# Supplementary material
Source: publisher figshare collection journal article supplement (https://gsajournals.figshare.com/ndownloader/files/22150416)
Supplement: Supplementary file 1 [file 22150416]

>Arab_Me14_ctg01_-_Arab_Me14_ctg01g1t1
MLHQLDRIVIDECHVLLELTQDWRPDLLKMVEMTEKGTQTVTICRDERTTRTNIAYQVLEYTRGTLEKVLIKLVAAKRSRYGPKAQIIVYCPTVDETKRLAKLLQCSAYYRQIGLDKEKARMVRSFTLGIEKLCTATNMLGLRLDAAGVRVVIHVAMCPLLLQYVQESGWAGRTGLDSKSIVIRACYVTKEGRVEKALGYKLERPAKEFMTVESCRRIAIDKHMDGRQNRQQCEMGESKCDLCERHPGSTKRQAVEEEQEEPEETQADTAAVAAEEQRRCIERAIVVKEQRVKIQQQ
>Arab_Me14_ctg01_-_Arab_Me14_ctg01g2t1
MNRMLRLRTLARTQAKRRNTPGIVSWDGDRLLIDKQSFSLADLWSMVKGLCETVRLQLFKDVLLLDLDERGCVQPGTTPLLEVSVDKLVDQPAELATGWSFLKHPDNQLDRWQDWLLDQVLDEAPLRERFIRGIDSTQRPERTLWRDDAVARYMKGVRQFKEGLFTLVHMSGGGPGRGTEITSIQCENSADGVGYRGVFVEGGLVSFTTTYHKGYSFSKRVKTIHRYVPWEVGELVVYFLGLGRPFIDDLQMLHNGVARPTAFIWEPEPEEQWGDESDSEESDDGDEYGEADREKARSANPDGYWGTDRIRRVLREQTFQYMNTALGTRAWRHAYPAIHRELARDGQARDWLEVLYWNKAPAKSNAQALQSSHSLKTEEGNYGRSMMESPFQTMAEREEFRRVSMDWHRVLEFASAWEDGRMHPGVRAEMVAQQEKQALQRWSSLAMVDLKAEFRRLAGRPDAEYRGKQEESLKAVMQQRLRVLVVIATGTGKSMLFMLPASVSPGGVSVVVAPLNALQDDLQDRCDQLSIPCAKWDGRRPPY
>Arab_Me14_ctg01_-_Arab_Me14_ctg01g3t1
MELFAQLFKHWPELRVVVCKPCATAIPPAQIVTHLKERHPKVTVATRKSLAAAVRALPNLAWSPGDVRVPRPAKEPVFGLKSREDGLVNEQKRGGDIRQKSKHSRNRVWRDSQSCQRLFRAVGWPAYVAVETSVGAATLADISQRVKADRQHQREERKAAAAQDKIKEGIRSQADPWLELTEWVPHLQGIPRAALLRAKQLAGGEVDARGKEEVAFNNTGLRDVCKAMERLIRKAFDSSRAEVVGRLALEIIERREAGAESNERPFYARHRVGTIKKYSQKLVSILCYLWRTYDQVERPPYKLTSTQDALLVSLQQIARSDDAAKKEKLEERCLRF
>Arab_Me14_ctg01_-_Arab_Me14_ctg01g4t1
MHWLAALDSAAERFDGGRRSFPLASEADFVRNYAYEPPNEDYKKLFFCQATISRSQRDPGARPHSAGWLIPTRDDASVCKPVFIAHSVLSAIWLLRETLADDVLPDNIWDRLVCAAESLAEDGMEEPPSAQKPFASPSQQASAPPLQQKKRPHLSAPAPTPKRAQTTTDETHPASPQLSQPSEPDEQLKDSPLHITTISNNNRRAEQKRSRTLATSRAKKRLALGLVAPGDKAPLPEQAAYTSIVQKDKSVVAWIIKQPVSDDTDFYSSTQTPYLTACTLLEKARVLGNQSSRYHAAQFLQAWRERGSPFRGGGELAGSQSRTGAGAKRLQLLSVRNDADRDFCFAWNMCTRYEAELAAVYIESRWASALLGQAYSNKIAQIWHNDFVSSNDRTRNQYRKGQIRTEAVAALVELIERTLCVGQLHVWIKLLKKECPDICAASKALKNWLGLEGIAGGPINEKKTLSIEAEAPATIYEVEEIQDSKDDETDNSVDDSTREQSHTSPKSPTPAPRLPPSAPALSPKRARTEAVETPAASPQPSEQLSELEEQPGEQPGEQPGERPRAGDDERGAYASISSKDKEVISWLFKQEAVGSNKKKLNFYDAVKTPYLKAREFVAKARALGSSSSQEHAAHFLQVWRKRGTLFGGRVAARYDAPSLQLQHLRAILVDPSQQSSADQAFCSAWERCNVYNKVIKLVHIKYRWAQALLGKALADKLALIIHNDKLGVNVFIKLVRKERPDVCLAAKQFDEWLGLEGIAGGEIKGKKTLSIKVKALETTYEVEEIKDSKDDSEEEEEEADRRVEIAQSQARFKSAPAASLRQITLPKLFKAI
>Arab_Me14_ctg01_-_Arab_Me14_ctg01g5t1
MGYEGGESWTFGDKLPGWLVYPERVESYRRGKLHPVKIGDIFQADRYQYKIVRKLGHGSFSTVWLAECTSDPRYVAIKILSSDASSTSKEVQINRIIRANATARGHIVTLLDSFKHDGPNGEHECLVFEPMGPAVAACYDPDYNPIHAWQAKSICKQLLTALKCLHDLGIAHSDSNPGNLLLSLTIPIQQPSSGGKCWSTGVKGNPQIPERIYENRPLTEFWDREVPVELKLSDLGAAFFSNDPPATPVIAIGLRAPEVVLQSSFDHRIDIWSFGCLLFELFTRAPLFVMPPFNLARTNTDHLHGTSNDNNLPQEGDGDFLPGADRNDQALQENNDDHLLQMIHALGPLPPAMFERWPRGKRYFNKDGEQIRSDVGESEIPSDILVGDTLEQRFQRRKPKKMTYNESAGLLAVIRSALKYDPKDRLSAAQLLALPWFNREYIE
>Arab_Me14_ctg01_-_Arab_Me14_ctg01g6t1
MASSLGKDDSIIIVGAGVFGLSLAYELASARGYTEITVLDRSLPPVPDGSSVDISRIIRSEYADEVYSRMAKEAMVGWRTDYSQHYHEDGFVLLAEGDNHPYVEKILEYGNKDPNTRARAYKVKETPSAIKQAYPAVHAKIEGMSAVHNPEGGWADAAGSVNSLAERASRIGVNFVTGRRGTVVGFEFNKSLTQVTGVRVRSGPSLRASRIVLATGAWTNTLVPNIGHAMSASGQPVGFIQLSPEEAAQLKPHPVLINMTTGVFCFPPSPDNILKLARHGYGYANRVPASYGAKLPQRPMVSAPNRDKDNSRSGYLPDDADQALREGLQQFFPAFADRPWSNRRLCWYTDTPDGDFVVDNHSTVQNLFFATGGAGHGFKFLPVLGKYLADCFEDKAPSDLRHKWRLRPVNQEQHGDKFGDGSRAGPPLRQLTAIEQANL
>Arab_Me14_ctg01_-_Arab_Me14_ctg01g7t1
MLNILGRVTGKSQPEESKESISAERGLPASWYRSPALYELERRAIFSSRWILVTHRLRFTKPGDYVSFKEAGFSFFLVKDRDNKINGFHNICRHRAYPVVSQESGCTAILSCKYHGWSYGLKGNLAKAPKFDTVAGFDKSQQGLLPVHTYIDMLGFVWVNLDASERPAVSWDSEFAGIDTQKRLQIFKIDDNYQFDHQWAMDGDFNWKTLADNYNECYHCPTGHPGVAAISDLSKYFVETNGGHIQHYNSNKDPNEDTYQIASTFYFPNASTTVSPHYFYIMRCVPVSASKTRMEYEVYRSKTATDEEFNKIHLLYKQVLEEDKELCNAAQANLNGGIFINGQLHPEKEKGPLYFQQVHRKLVMAHREIEKTENDGAQLWPASPKPKGIMKTAKLSEEEQFCAELEADSDCAGGSASEGGPLAW
>Arab_Me14_ctg01_-_Arab_Me14_ctg01g8t1
MEATWCSLVTKLEDMLEILKSCEHPGQITRSRLEHSIATIIDTSLQLRAQYPKLSQPIEPHESTSAASPQLDPPNDRSVQDRLLTAASSGDSQLPGTQSRKPTPCKPVERQVIASAKRKQDKDSDIRVANSVLHLSKRACRSDKTKDLGDSHIPELRKLQDKYSKYDKLCRMSVFEKLDDSLSSRMLCRIAAMQGGPAIRQFCTLVHHSRSRETNTGLLQVQGEGIERALCLARSLQVIVGRADFDNYLTRIAQLQMAMAIDGTDGSKTGRIRAAKETITDSMDRLGWPHEARPKFHWHLKRGRQWNRLCGSRRALIVFIPFRAQEPYNVNASDYLAMKGDELDRFHQLVDTPFEAAICRAAEWFQDSLIGSSDDVEFCWEKQHPNLRNGSEFIRETELTTRISKLAKAT
>Arab_Me14_ctg01_-_Arab_Me14_ctg01g9t1
MDGEVDLPALTPLPSYLYQLLNTNTLAARHFRKELRAYNAAFAFTSVDCTPTSRGAQGPGVQVFQIHGALYHRSGPVEVLKGSLPQYAQLYFYDPQYAANARHQRNSHLQLQILQDLTAMLYEINNPYISIYRTAQDQLNSSAADARVILTSRLTLALETGQDRRRENVPTSDELGLVIPDAAGAETSRPIVLAARNSSALFTISAAHPSYMPLHYVLMFPHGDSGWRPGLTLRNQDGSRLQTSLTQQTYYRYYLHPRPGQTTNPFRFYRLFQQYVVDIWAICDQARLAWIRANQAQLRADLYSGVADAVMGNNDAQAGPVGRRVVLPSSYLGSSRFVSQCYQDSMAIVRRYGRPTLFITFTASPYWPEVARELRPGETGLNRPDLICRAFHLKVQKLVADVKSNLFGTHLGHVYTIEYQKRGLPHIHLLLFLTPHNRKAFTDPVTIDSTIRAEIPSPVDDPDGLLTEVVRTFMLHRPCREHNLQAPCMVPQRDSAPPQCSKNFPKRYCLSTVVHKDGYPEYQRRDNGCTLAVRCKGRIVHLNNSWVVPYNPGLLRKYWAHINVEVCGTIHAIKYVHKYIYKGTDRAVLNVSEADEVKQHLNGRYISPSEAVWRLFGGCLSTQYTWSGPL
>Arab_Me14_ctg01_-_Arab_Me14_ctg01g10t1
MYFCSPLQGERFYLRLLLTTVRGPQSYADLRTFSGTEYPTFQAAAAARGLLLHDGDWVACFQDAVTFATGQALRYFFVAALLNGPVTDPAAIWAAFQADLCDDLPEAAAALLVSADPDAYLDYGLYLIEGLLAESGKRLTDFSLPACQFNWGVRLQNQLLAAELAYDTDGQDTAFWDTVTGLNMDQRAVFNAVTAAIEADHSTAHFFVQGLAGTGKTFLWRCICAYYRSTGQVVLCVASSGIAAVLLPGGRTAHSRFRIPLDIHDDSICPVAPGSELGRLLQAATLVIWDEVPMQHRYCFEAVHRMLQDVRSSPALFGGLPVIASGDFAQILPVVRRGQRPAIVNACLQQSTLIWPHMTVLHLRQNMRVLSGADNTCFAAWCRGLATREMDGLISIPDWMTVYYSLQGFLDHVYPPHLLQQAAADYQVLNGRAILAVRNDAVAVINAAMLAAFPGELVELVAVDSAEVEDNTTQDLPPVELLQSFEPPSLPPSRLLLKVGVPIMLLRNLYPSQGLCNGTRLAVTQISSRCIQARILSGEFAGQLRLLPRIRLTSTSRELLFIVSRVQFPVRLSFAITVNKSQGQSLSVVGVDLRYAVFTHGQLYVAMSRVTTLAGLSILLPAPDTSDEPSCTVPNIVYPEVLL
>Arab_Me14_ctg01_-_Arab_Me14_ctg01g11t1
MDSSAPADDVAAPANTAAADAAAALAAPANTANTAPANTANTAAANAAAAAAAATAAAATAAAALAAAPALPPLPLPLARLPPPPCSPCRPPRRPAQGWLLSHSAVEPQICARAAGPYTTCVVVTGQLLDLCANCHYGSKGARCSFRSTPAPVVPVPAIATPSRSRRQVAAAAAAAAAAPAPAAAPATPSKKRRRTTATPAASPAAAAAAATTATASKKEKKKEKRKRKKKKVRKCVRDVKKSVAALELAIDSSSLEDSDEDDED
>Arab_Me14_ctg01_-_Arab_Me14_ctg01g12t1
MAMVRTRPDLPRRDVLSLVPVYKLQLHLNDHIEFQVFEKSPDLGGTWYENRYPGCACDVPSHVYQYSFAPNPDWSRFYASSSEIHQYLKHVCKTFGLDKYITYNSRVTEARWDEEAGIWHVGVEGDAAGAYEAEILVNAGGILNNYKLPDIPGIHDFSGKILHSAAWDNKAALKDKRIAIIGAGASAVQILPAIQSTCKSVDIYIRTPSWIAPPVGLPPGRGANPLYTAEEKRRFREDANHSLITRKEMEANFNGMFAAFFKGDPAQKVLKNRFDEYMRELIRDPELQQKLIPEFEVGCRRINPSAPYLSALQEQNVQPIFDPILCIKPTGVVTVGTSDGASETSNTLHEADVLIAATGFDTSFRPRIPVVGRNGVDLRQLWESDPVSYMGTGVAGFPNYLSFLGPNTPISNGGLMGVLESTSDYFIRLLTRFCRERVRSFDVTQGAQHDFSEHTQRYMQGMISEELMPVFGPAGAELCVYRGSGVES
>Arab_Me14_ctg01_-_Arab_Me14_ctg01g13t1
MTDYPEEPLKRPTSNIVGTVETAAEGNIDLLVGEDDNPALAAKIHLINDAIDEIGWTGFHWKLFFLNGFGYAVDSMVLILQGIIANQAYLEIGDGGYQTGLTFALYAGLLVGALFWGFGADIIGRRIAFNITLFIASMACIVAGASPNWGALGFFISLIGFGAGGNLILDSTVFLEFLPSDKQWAITALAGWWGLGQALPGFIAWGIFDWSCTAASHCTWENNKGWGLIMFISGAFFFVLSLLRLVIIRLQETPKFLVNAGRDEELVENLQGLAAKYGRSCSLTIEQLKACGESRSSIRKRTPRGIMAELTHHVAGLFATRKLALSTSLVWLSWTMIGLAYPLFYVFLPTIIAHRIPHETTSVYLTWRDFVLTNVSGVAGPAIAGILVNFRYLGRKYTMSIGAIITMAFFFAYTAVHTAVQKLAFSCAISCSINVYYGTLYAYTVEVFPSGSRATGNGIAVALNRLMGMLSAVVGATASTGSSAPLYVCAALFLCSALLSVALPFEPYGRRSS
>Arab_Me14_ctg01_-_Arab_Me14_ctg01g14t1
MNFNLDFKVLAYPASNLSVDEPVSPSLCSLVFRCDDAKVATLLLVARTPTAHGTDSQFVLQYDADTLMPYTAKLCSGNGHVSQSQLDKILPVKGKGKKRPDIKTLDLSIKGPCPLWSSANDPAFSPKPGFEPAFQTLVDLAKATRVHVVLDYSHVRKQYQGMFKAFSRATRGLVGYPVEGLLVEQGLRKTSWKVFAPTEDAGAPPAYEGSRSQSSSSPIQPPRYWTPNSPTGSHASERTIPFSPEAAAAALRRAELEYQTDVINAAFEKRLSAHLDEVRALQVKAIDSAVATHLPAYLATDRLAEAVDAAVSRQLDTALQALLPNAVEDLLVPKDPPSSPATSFTSHDSRGNRHPKLPPLTRVGRTMLPHLRTHLNEQFHLYQKQQLQRFKNLADRTFDELERAAYDDRAREHADFETEMEEHKAEISVMKKDTLDGLWRQGNEMLEQGKDVCLDFGKDINEQLFGLCDKIDKLNRHALRRMVAAEVSKQQRKKEGLPRGWGRNMLSGEHKLLGRRREMEEEAWVDV
>Arab_Me14_ctg01_-_Arab_Me14_ctg01g15t1
MQRLLSPRFTRHLSSASAGITAAQSFGPQGDTTATIPTLIPSFATALLPASSLSTVPTLPPASPSLAIPLPSLILAQHSVALYPTTTPAPAALMSDAIPFDPQSALPSDGATPWWVVTEFLQPHGLPTEPSYVLLPPPLIPEPTATRDEESLSTVTNLLGPTLEPLPSSVNLGSPVIDEPAVPFPDVFAFDPDDWLWPFAAPYSPQAQPPILSPSFKPDAQGNLPTKKDITNRYATSDSTDSGVIETGKLIADVWTYEFYDTGLVHIDDTFLNPSTNIWGYLPDGTRIGLDSAGVYIGWEKRVPYGPEMLDVMKAFWLPEPQWFI
>Arab_Me14_ctg01_-_Arab_Me14_ctg01g16t1
MLLILATLFCVSGPVTATTKPQACWRNSTCNGPSHPAFTGPWEAFNLAPKSRSVEPQTLLSLPNGAPLGNYNHNGTIIKASSDGVVFDFGLEVGGILSFEYAMNGNSTNASIGLAFTEAKDYVGRKSDNSNGGQGPDNALLYPLNTTREGSYIMPDVSLRGGFRYLTVFLLASPNESLTVRRVKLEISFQPTWPDLRAYQGYFHSSEPLLDKIWYSGAYTLQTNSVPGNTGRAKVQTDRVGWNNAAYIGPGDTVLLDGAKRDRWVWIGDMGTAVPAAFVSTGEMESTKNALRAIFDNQSADGTLPKAGPPYLSKDSDTYHLWALIGFYNYYLYTGDEIFVQNYWSKYVLGVNRMLGKIDSRGLVNVTGTADWGRWTYSSERSSASMLLYRALVTGSSIADWSPSLPDASTHRTNWTVAASALQASIITHLWDDMRGAFKESINNTALYPQDANSMALAFEIFPASDPRAQRVSTYLTTNWTPIGAINPELSANVSTISPFISSIELEAHFKIGRPERSLKLIRSAWGWYLNNPNGTQSTVPEGYLADGSWGYRGDRGYRNDPSYVSHAHGWSSGPTSTLTEYLVGLRITEPKGRKWEIKPGTFDELERAEAGFTTALGKFSARIQVLKKTVIVEWDTPVGSEGYVQVPGQIGRTVEGGPGFKIVYRT
>Arab_Me14_ctg01_-_Arab_Me14_ctg01g17t1
MNHIPPHIPSPSSLAPHQYEQEHNTLVRPQSQQSATIDFLPSGTFATDFLSGTLTPSGLIGYGGEIDLDFSAIDLNFLNTYNTRVPFEAQTPVDLSLNPHNRTTAWNRSISGEGSDAKLTHGNISNSIWRFVPVPGVHGYSEQGDLSIPTQDHIEGTPESLVEVRRRATTEKLDSAARDKILAIIFSQVRSHILPALSAFPSVMLLDKLIQFFLAGPTPSARTWIHTASFVPGKARPELLLAMAAAGAVLTPDRSLRKLGFAIQEVVRNHAPTVWEADNTLVRDLEMSQAYMLQLAIGLWSGSSRKIEISESFQQPLLSMLRRGNRFRRSSYSVQVFGPEDVGFVLEQKWRTWVQQESFKRLVYHLLSHDAQASMSLLTNPAISYSELDLPLPEPQELWLAGSAEEWKEKYQTNTDMCTTMSPSLTECLAIPDLMQERKMVIDFQLSCSAFLYAMWGMVWEYRKLARLFFVEPNRNSVWDSRLTMMTRQQELLKVFDYYRVIYPNENMLLLELILMHLHTSLEELQHFCGLGETLEDTSHVQASMKEWASSKAARSAVWHAGQVVRAARQLPPSHLRDFYAISLFHVSLTFWAFGLASRMFSYDQESVSKARHTAINLQQVVHVDDEETLGTYRYTSLGVGTPVMHNHGYDAPLVPLSDLTDVMSVMIDIMGQGDSDPLMPNSPLVENLLNTMRRIRDTTIAKDST
>Arab_Me14_ctg01_-_Arab_Me14_ctg01g18t1
MPKRILHDEIAIVSGSSSGISAHIGHELEWRGANVIINYTYPKLREEAEKLAASLPTGSIAVEADTSTIDGSKKLVQEAIKEFGRVEILIKTAAFAVNKPFEE
>Arab_Me14_ctg01_-_Arab_Me14_ctg01g19t1
MRFQSVSVIAAAIATALACGGDHSCYGPLKDDVVLTRNVRRMQPDASNATTGPKAPLEWGQINFLHTTDTHGWLEGHIKEQSYGADWGDFVSFTRHMKQKANKLGVDLLLVDTGDLHDGAGLSDATSPNGVVSNPIFENVDYDLLTIGNHELYVTEIAYETFSNFSKVYGDKYITSNVQIKNPATGQFEYIGAQYRYFTTERGLRIMAFGVLFDFTGNSNVSKVIKAADLVKEQWFLDAVNYKDPIDLFVLAGHNPVRLNESSSSFDTVFGAIRGERPDVPIQGFGGHTHIRDFTVWDNKATALESGRYCETLGWLAMSGIESTAKKVKKNPKGVPNPTRSAVPPPSTGTVSASLQLPTSTSPSSLRYARRYLDWNRQTFAYHAKGSQNFNAFGTPKGAAVTSEITTERAKLNLTSLYGCAPETYCQYCKPYGTDGNIFKLLQTALSTVVVNETRKNNSRLIIINTGSIRFDLAKGPFTYDDSFIVSPFDDAFQFIPDVPYEQASKVIDILNAGPYQKKRDLENADFDFNTILADRDTCIDPPLTHSYEGVTRRSKQGGRLIRRQSTTPTPGYTTVDDFGNDGDDTVHSNIPHYPQPNDLQANGSFPLDGSLPKTVDLVFLDFIASYIVNALNSADVGGKFSLNQVSYYMDKKFTTNSYLPAYAKVAWQANVPNCPIGEGIGF
>Arab_Me14_ctg01_-_Arab_Me14_ctg01g20t1
MAPFKVAVYLYPSADILDFSGPVEIYSMRPASGETIFEVKTFGHHDRISSESGSLVYVPNGIFEELEANIADYDILVIPGADFDVFDRLLPSKEGKELTALLRKFVSLPPRQEAGARILQSVCTGAIILAASNVLAGRTVTTHHLGFDMLKTTADKAAGGDARIEVVKKRWVDAGTTEAGVRIINAAGVTSGIDTSLWIYEQLAGKEQADYVAEIAEFERRGEAWGT
>Arab_Me14_ctg01_-_Arab_Me14_ctg01g21t1
MTSSFDISKARERFPALQQDQVFLDNAGGSQALGDVIDSITQYLSKTNVQLGASYHTGTQSNTKYEEGYQAAAKYINAGRDEIVLGASTTQLFMNLSSAMLLNEGDEIILSKMEHETNVKPWLFMAERLKLKVTWWHSDKPELKLTAENLRPLLSTKVKFVACTHVSNVLGSIHDVSAIANAVHEVGALFCVDGVSFAPHRRVDVKAFGVDFYAFSWYKVYGPHIAVLYASNSAQQYVKPMAHFFNPTKTLEDKLGFAASNYEGVQAIPEIARYLEGSDQAIIEHEGKLQKILLDFLNSRNDVTVIGSASADSKERVPTISFVVEGISPKTIVVEAEKISNYGFRWGHFYSKRLCDEILKTGPEGVTRVSMVHYNTEEEIHGLVEVLKKVLPQSS
>Arab_Me14_ctg01_-_Arab_Me14_ctg01g22t1
MRTQLFVGSLVSSVTSLSLKELCTPSYAASKPPASGAYQGITVNAAHDGRDDLVHVSYYAPDSSTFKNRLLATGGGGLAINSGSTSVTGGVSIGAVGGLTGGGFGSFTTQGDVHFFLANGTVNWENAYMFGYQAIHETNVLEKQLTKNLKAFYYNTKLYAYYQGCSEGGREGWSQIQGFEELDGASVSAPAFRYAHQQTQHLYSNVVEKTLRYFPSPCKLDAIANAIIKFCDPLDRKTDGVVARSDLCKLHFNINSTIGLPYYCPAKSGGRNPFGPGGGASTPVQNGTVSGQAAAVAQTVIDGLHDTRGRQAYFSYQPAATFEDAQTKYNSTTQEWELNISGLGGEFVTRYLWLQNTSTLASLEGITYDTLKEEMYNLWQTYEDSFQTTWPDLSRFEASGGKILHVHGESDNSIPPASSVRYWESVRSIMYPRPSYNESTTKLQDFYRFFLVPGAAHCSANGYQPNGEWPQTVMRPLVDCVENEKAPDMLDATVLLGANKG
>Arab_Me14_ctg01_-_Arab_Me14_ctg01g23t1
MSPTLTHLAEFRLPDYPAASLTLNGKSLSIYDENSSLTNQEQEPSAVPTGIATILYRWSPAALAAFLDTDAWFSLTWTVALPENKACGESAKQLEIGRVGNQVTFGTLDASGDNFEIMCTFNIALASETAAGVERRRGEWVPNVRESMLGEADMKSGEEVEEVGARWVGDVLANKRWDAAKGVKHSFHVEYAPMDIFGDGIPMSPHWLYNALDLSKCTTCNTEGSAAKPLNRCGRCGTAAYCSSVCQKEDWRVHKWVCTMSMEDRGQAIKISEKSGLYKWDTARTMAAKGEEVASDNPFFETVQSRRTREE
>Arab_Me14_ctg01_-_Arab_Me14_ctg01g24t1
MKSVIAVAALAAVASAAPTKRATGPTDAAILNYALTLEHLEDTFYREGLANFTEADFKAAGFASDVYGRIKTISGDETTHVSFLTGALTAAGAKPVKECTYDFGVTSVQSFLATASILEGVGVSAYLGAAADIMSKTYLTAAGSILTVEARHSAYIRNVNKQSPFPQPFDAPLSYDEVYTLAAGFIKSCPSDNPALPVKAFPSLSASSKDMPIKTGSTVLLGTSGYKIEGTVYAAFIAVTGPTFVEAKAVNGGYEVVIPEGFAGQSYVVLTSCNTAATDDTILAGPAVVEISA
>Arab_Me14_ctg01_-_Arab_Me14_ctg01g25t1
MKSFTLVAAAVLAAGVSAQYSAGSVSTPVPTSIPGGCNPAHPGSCPTPYSASQVSVSKPASSKPASSKASSAPPASGSITTTITAKAGCPTGPAPDVIVTRSNAPVPSCEAGKNATKPSIMSMPGYGPPAPSAGSGSGSGSGSNSGSGSGSGSGSGSGSGSGSGSGSGSGSGSGYGSSYGSSGNGTKSTSTSSSNLPEFTGAAGRNMASGALVVLAGVAAYLL
>Arab_Me14_ctg01_-_Arab_Me14_ctg01g26t1
MTSPSNLPAMTSPSNLPAMTSPSNLPAMTSPSNLPPLPLPSGVTENYLHCPSNGLNFHILEAGYTPARDKPLIILTHGFPELAFSWRKIMAPLAEAGYYVVAFDQRGYGRTTGWDTSPFDKTDMSHFTLTTIVRDVVALVHALGYRQVQCITGHDFGAVTASLSALIRPDLFRSCIMMSHPFKAPAALPFNLRGGEEPPAAPVDIQAELAKLPEPRKHYKWYNSTSEAAPQWNNPPQGMHAYLRGYLHVKSADGSNNSPAPLNEWSAEELAKMPHYYIMPLNKSMPDTIADMMKTEDASATKRWISDADLDVYVQEWSRTGFQGGLNFYRTTTDPAKQKDVELFAGKKIECPSTFISGKHDWGNYQQPGAVEAYPNSCSDFRGTRFIDGAGHWPQQEQPEKVVQEMLRFLGSL
>Arab_Me14_ctg01_-_Arab_Me14_ctg01g27t1
MFSKRRRAASNPPQRAAPPPSASAALAATTAFVRNQASDANLSNAAAAAALRSHTSSPIPVGDVVTKRMVRRGSTSSQGSQRPQGLRRQSSAGSMTERSFRNASPGRGSPVAVPPVPAVPRILHGRAASLEPVHRRGASPTQRGGGAGGGGGGGGGGGRGDSGAGPSANAGSTQRVGSPLAQVSEEGQDQRQSINFSRPMSPALSVTAGGPSATHAWFTGPVVDHEAVQRMASTSQPKKAAATTRPASTHQLKPAGTAAQSRSFLPATSPSPRPVDPKSPDAVYDPSTRTFIHKQDAMHIHREQHQQPDDPAHRYVAQHLHSAAPMHAARARTPSPLRYTVQPEQSPPPSVAQPLLPEPHTAADTPRYEERPISPPPSHPRPAPAPALARQRPEDYTNTDIKPVDLVPIDLGQANTHQEPESDLSPRFTPNKDSAYPRIGSPPDTASNPRVEQVRGHVRTERPASLSPARHATFAPTTIEFAGLKHEPLPRSVSPAKSALKSSPSVSRRSNSPLAPNGLGFAKAASVSGASDTASESGYGNKKKKTVRVSFEQEPVLAGHSAYGDMDAPSSPAGPTPYQPIAAAQTEDEFEDFMKPRPALPSFGSVRDKTRPRDEDDVPQKVTETVSTPMSASVASVGEPMEASTDLGLAHIVAQDFASQKTATGDPLPPQLASVEGSGYASDSNYSTDGESSMRKHADPATAPQTLPVPEPKSLTKPAAAQPSTLPIISEQVVQVPNIAVLPATPSPYEHAEPRFQSMSAPGGWNDEEEQQPVASAYAPVQFAPIQTPASFQQQLSEPPSSPGHDGDTSDDDSSVYSDAYEDVSDMEGGFGSINAIVESPVIGSTPSPGLMNSKYADKSVTESPTPQSKSDTPSLARNEPVDQVTRDWEAARAHWSGVNRPRDHDDAHATQSPAHVESVAARVLQAPVQEEQLRAQHKPTVQPATRAVAETRPRVSMSQAPPKSSVSAQPTQTPDRPLKSALKKSTPSPAPAQKASGVPQMRTSMRGASPRDASSGQTQMRSTMRGNASPGPRAAPQMRTSMRGNGPAPTTNMALAASRQSVPVDPKPPRGALQKKHIPAGVAASQARPQSLPAPAPRKATAPAPTYDSDSDASASSFQRSRARRNNAGGFARTSMRGGPSGPTMRAAAPAPAQVRSISPSRVSQSTNRPSMRPSSPTPEPAKSSRFSIRSLSPGGRFRKKPKDEPPMPALPRSVPKPATVSRQPKGKTPAPARSSAFKSRFVDSSDEDEARPSRFTSRFEDSDSEPEPYELPPDLTPVRGIPRKAGEEDGDSTDLEEEAEAPKPSASAPANAAVTNGHGNDASTAQGTALAAGSLRDSKHAPSSPETKTKRGFFGMGKKKTAPAPPPAAAQTARPPTSDIPLPPQPRNREIGGPLTPIGEDEDKELGASPPAITASPQAKQSPRAPKLQRRSTPEWPLAPPPPITGEQRPMSSDGVAQRPRFGKRQSSQISTATSPVLDAQGRSVSFGRTGKKKKFQGLRRVFGIND
>Arab_Me14_ctg01_-_Arab_Me14_ctg01g28t1
MSQSTTLDAHLQSLVAGHSNRTALIQEVIPALLRTLPDIAQALRTTSVSQAGSANSFGDDQLNVDVLAENLIRKAIAKVPSIATASSEEDPIEKPVHKTQPTSEEQYTIAFDPLDGSSIIGPNWTVGTIIGIWDGTSALSTTEAPRKKQIASILGVLGPRTTAVVALRLPGTPGTCFEASLADGAISMTRPSVQLATAPKTKYFAPANLRAASENTNYLALITHFVSSKYTLRYSGGLVPDIFHALVKGHGIYTSPVTDQSPAKLRRLYELAPIALLVECAGGVALDARDGSPVLDTPIRDTEERGGLVCGNAGDVEFVRTRLLDA
>Arab_Me14_ctg01_-_Arab_Me14_ctg01g29t1
MLDADFTSQGLGQLSAEANAQSYAQDYGPPFWNINYFLEDYVNSLPSTQIMPADMGFSLGTSVEEDPANPKVEEDEREKITMLFLKTTCHNLSIEEDSDQNPWKTVIWPMTQQYPALYHALAALTCFHTSKAQPHLRFDGERHLHTSARLLSQGITKSEIPLDTALAATLALGFAETWDSKSATTGMTHIRSAGMLLQQMLSNQATMAYTPEEEARLEFLFNTWTYMDVIARITCLDLCPPVPESFVAATVGRLNFSTSKLDPLMGYATSFFPIMRRVADLICKVRMRDAPRNSPVIISQALELKRNIEDWLPPIDLETIEDHSQLMTDAIQTAEAYRWSTLSLLYQAVPELPNLTSYGELAQKILVYLATIPLSSPTLIVHILPLMIAGNDAVDAEDRAFVRDRWTAMSHRLVTGIVERALEITEEVWKRRDDFLLARSRLVDLESTHCAANYGPSSGAGSSPSSARPSSRRVSSFPMSAAFKKGVDTMTRSGCIEYTVRGSLHWLGVMKDWQWQGKASPPLVLCWDQDVLTSWVVLLG
>Arab_Me14_ctg01_-_Arab_Me14_ctg01g30t1
MAVISSLASLAIAEEGRPRGNFRLCTEVTPQCPAIATTYGYYPVLGVNAFFLALFGLCCLASLIIGIWTKTWTYTVALGIGSLLETGGYAGRIIMNGNPWSDSGFRLQIVCLVLGPSLVAAAIYLTLKHFVLYCGPQYSPLKPRLYPWVFIGCDIGSIVLQACGGGVAASGANNIKLLNAGNNLIIAGIAFQVATMAACGLLVLLFVWRYRKDAPMKGQLNEKSNYRLSKEQGNISLAKVKIFGAVVTLAYVTVLIRCIYRLPEMAGGWGNPLMRNEKEFLLLDGMMIGIACVALTVFHPGFFFPPFAAFRHGKRRVSSESD
>Arab_Me14_ctg01_-_Arab_Me14_ctg01g31t1
MKTSKYAPKTPLEQLTQSRVDKLKQDKDKTTRLLGRLRWKAELLMVSYFKAMELLQAGDQRNGHYESQKALARQAESMFKIDFFEFYAFLERYITFCLTTLGVSVSAAAPRNNINALRYITNPDLHRTRPLASHAFHANLLEALDDETCPLHGSLGVQDVRIQLGLAKDYRNAWKDADEKEVTSNWDSQDGASPRNVKLPELALDAMLRTVIVGCGHAHDVVQAFEGADVIGSGLSSHDFEPPTYIHDTMDMGDVPLEYMDDAMELD
>Arab_Me14_ctg01_-_Arab_Me14_ctg01g32t1
MPSFAFWKSSKPDEAKAPLLSDAAVAAELSAIVPGASRGVDLNPGNQDSGVFLFDDDAQEISEDHALDAEPIPLPMTEVLLEEHEQTTTETLVTDESLLDSDEPSPHPETPSLVPEQPLQTGASNVSEHSAAEETAQKPEESQIDSLQLEQHETAVESSKDEESHSPSSSPPVSLVPKELGPNLSVEKRLSPTALVKVETRMRDRDSGVYMSDSESSPARSRPSSIASNDNVLARSRVSSLSKPTAASPQRTNSIARLQRPAELNLGFNSAPDAAKPRSELDLRYDLIRNSKTQSKAALRSPTQLLQDRLNMSPRKKDVEEKVRVFTPPRATANGCMLPGPGAQTEAFTSTSVRARTEAGGRPAWWCKFDKLVVFDGLEQQGSGELGLKTRTSKGLSIARRLGDLETVVIPLDCPHCHEMLNRHEWKYDMRVCKRSVCWDCKERCKWELEQEKTASVYTPHTEANRERADSMLQDEQSRHYGMAKGVAV
>Arab_Me14_ctg01_-_Arab_Me14_ctg01g33t1
MFLFFAPAKKNWRGWRVSMSSTAFAHTSNQSRSIAERRRCSPSAPPRARAPSTSTEHEFELELEFGVESPPPWPSRLQNGGSAHPHQRQHQVQLQVQLQVQLPFQHPHPHPHPHPHPHTPPSSSAQTRPRHGPPSSHGAMASANGNGQPMPVRINGQTHGQPPTQAPAHAHAHAHAHGHGQAANLREMGFAGARSPPSNKSTSHVPCKFYRQGACQAGKACPFLHSDEPVTERAPCKYFTKGNCKFGHKCALAHILPNGHVVNGNMGRGHFGRVNIHSQDPPLNSSLLTMQAHMAPMQPGYPYPAQDDPYAMPKAHYDMIPTIDTTFSSHPGSNYGSPPNDNQRLALSPVQKGLGVMDVPLPASFDSQGISHMARYGPIASSVPAKFLAASPPSSYHADSSALRNLHDSAFGDGARRRAAVLGSSPPDSVDPPVGRRMLHSELAANRSRNLMSSSVGARPAYKDEDWDDTDMIGKFEEDLLPHSLSDLLTPQEKMRRFSRDQGDSESNSFSHQASLSRFGASPTPSDTRYGSPSAATASPSRFQSLWGKSRPMNDNFESGSLPGASAFGHVGSPLRNSSLHAGASPSLRAMARPPSVDTSPFVSSPPRQASMSMISQQFQRTRLSSRDEAAAAALASTPTSNPQHPGINRLTSGSSIGSSSGRLGNLDRAVSSSSINRERIEEEQGLFSMEEEEDLKKSQDGASTTSSTSNKRLSGLSWGSGGKGSPNLQPVGAQKSSVLSGLGKETGGGAWGR
>Arab_Me14_ctg01_-_Arab_Me14_ctg01g34t1
MALSNGTSALQVRALMTRVVSYGDTSVVFVFPTPSISTSVTYWTGSYPTVTGPEALDLQTAPLTTRSIRQTPLSELPSLELFASTWSSFRTMVTTVLDEAATPTQVPAIEPVYCGESGNFTLSFDDTTVGPNESTLLVVNGMKNPYHHLFYANGFTYVPDKWEPYPAISQPNIAMFLPLTGRLLPNTAFTGSLLPGEIGAGPRASVPAYWFNAHSGFFGCALSGLTACTLRISGYRYDGVLKQEVLVAEQNATLPACWGYMNCRLTEVAFTEQFRALSGIQFNAFTSGLGIPQVHMMDDLQLEWYDKTCAAGILRIGHL
>Arab_Me14_ctg01_-_Arab_Me14_ctg01g35t1
MPEVEELRELLDGLLGLVLTPLDEGPTANVRLLLRTEEDESLETLEKFGTIELDKLDEATTLVLLKVVFAKTAEDSKVVFKVKVDVLEGGIVATTPVELDNAEDVPLLLELIEELKIGKRDAVGAIADTIPVEELHVKLDPGVIGAPRVVLKSAAGTVELAVGGVTPAELDAVLVSELIRRLDDISLGPVAVKLVEDGLPGEEK
>Arab_Me14_ctg01_-_Arab_Me14_ctg01g36t1
MRGNKNKSAAHRRRQSQTPVKDRLTEVVAARRKAGSKSVDTAPAMPPLATIFDAIGNWFIGKNSDDNIADEASPFGSTVDSGASPSHTPLSKKAKKRIQKRHNQSIEIETFTPSKESTSVGLDHAASLRQHPSASHITSSQLINGSMDYSPRTALYERNDAKRPSDTALKRDSVISNNWEDVNLGRSPRTTKKPGPSKQNWRRLIKRPSWCPCRLYLWLGEFLSALARGFQGPRRADFFLSLGLFLVCSYVTYVALDFVLFGLIKGVKAQNVVDAANCSVVYVTIPGPIITISLIAATPSDPARGTYYYSVINGTTGWLNSVTPPSRSHIISAPILNPTPGPSSLVLSGSSVLTPSSSSSPGLSASLEPSVGITVTTTITAGNTVILSTFTLFASLVPSTPTPPILPTPPTTSSFDSTTLTEQPSRPYPSPVVSTDMMSWSSGITSMALTTSGVGASSPASDRPDLSSNFVGLPGIGTSASLVASPSTPGVFPTGDLSAASNPTVVTSSVISSGETTVSASTSSTSIDITPPNTASISLLPSTSTNLAPSTTTLPDGRTTFVTTPTISSNMLPLLGSPSTTVSTTSTMLTTFTSTALDGRTTTVTLVSTSTPLVTSTSIGMTTAAPVTLTSTLPGGQTTTLSTMTTMIGGATSFPVPPLSSTAASQDLSISSGLVPSSSDDFTVSLPGLVSSPGDRYRSNVVFYYSSVR
>Arab_Me14_ctg01_-_Arab_Me14_ctg01g37t1
MAPSKTKTKTPPHKSNDHKRYLADHVNEAAGSTLDLNGSDADGKALQKMEQSNDSDLEGFGSEHGEKNDQEESGEEEDSDAESVKIDMEEKKAEKVVLPKDAEEEELERLIFGDSAGFKQGLDNFSLSRTAGMYGDASDEEQADEADLENVADDNLFFFDTGPEAAPAGSVAAAKAEESEDEEDKPAWDDSDDERLVVSLASIPQLRKLRETAEDDMVNGKEYARRLRKQYVRLYPAPEWAAHATGKAKKRRRTTDEDEESGEESGSDMDVDDDDDDLSTQPLARLLKDADILSRNVARGPAKRRKLQAGTVDIQRLKDVSKAGPSAITSLSFHPTYPLLLSSGPSSTLSLHHVNPNPPNPNPLLTSLHIKRTPLTTTAFHPSASDSRIFLSARRRYFHVWNIATGQVEKVTRVYGHQHEQRSMEHFSLSPNGKYMALRGSSRKGGGVINILDTRTLQWATQVRIESRGGVADFAWWGNGSGMSIAGKNGEITEWSVQEGVVGRWNDEGAVGTTVIALGGNSGRNDWIGGDRWVAIGSSSGVVNIYDRRAWSEDAEDVKLSSNGGIPKAPKPLRALGNLTTPTSHLTFSPDGQILAMASRWKNNAMRLVHLPSATIFKNWPTEKTPLGRITAVAWGRPTEEEEREGSLAQVAVANESGHIRLWEVRA
>Arab_Me14_ctg01_-_Arab_Me14_ctg01g38t1
MPNSDLHVSLLKPEEAEQYMHIRHEVFRPSVNKVLYSRGEPSQETLKRVTEEIRDGVVNKGILYLKCVDTKTGEIIAGARWRDVKPKDPNASERTWEEVDEEFKRTEPYDESDPDLFYALHDLFSSNKRSILETRPHYALDTLVTLPNHERRGAGSMLVRWGTERADEEGVEAYLEASPMGAPMYARHGFEPVKKVELDLRKYGGKEVMEFILMKRPAKVGTP
>Arab_Me14_ctg01_-_Arab_Me14_ctg01g39t1
MNINQPVQGRAFAIPFTRAADPNAELTDQELRLPFLKKLPDSMRNHFVAMCGEYVGTVLFLWFALSGTQVANSIPSTGGQTVAEAGANPQQLQYIALCFGFSLAVNAWVFFRISGGLFNPAVTLGMCLIGALPWVRGLLLFFVQILGGITAAALVTCMFPHQGKINVRTSLGGGTSVTQGLFIEMFLTAQLVFTIFMLAAEKHKGTFIAPVGIGLALLIAELTGVYYTGGSLNPARSFGPAVVNHTFNQYHWIYWLGPILGAILAAGFYKFIKILEYETANPGQDSDHAANVERRKNLLLAAGINEYDASKVAEELTEKTAVAQAGGPDGTLVANGQGRRSQEVDRQGIYGTQFRHNSTHSKHGSDGSDLTYPPPQRPLATTTGSQIGRFSYLGERGVAPGNPAHVNALAAETRMDSPAMTTNDQLYAPLAYGADVPLGGSVHPDNEPRQRFGRTSSSYA
>Arab_Me14_ctg01_-_Arab_Me14_ctg01g40t1
MANNHHGPPFPFPYPQMQQMQQPPSNAHHDGQQHPPHPPHPQHPQHPPPPPPGWNLPGLHQQYPPPQPYMPQPGHAENQNNLPQFPSAALWPPQIPPEWLQLMQSGMQSGMAPPPMPGLNFPPPSLSQTPQAPTTPMAFPPHFPPRPAAAPLERVQEVTGTDREDREVSDAEGALRTTAAIAVRQRYPEPPRSAPQPMATPSRTGDVYNPEKPSAGQTTSHTSTPKSVQQASAVVNEMDLVQQQREEAKQFIRLLNSNNIGYHALAKENIDIELLRAMYRSMNLPSEPEPIPPPKANGTAAPKSSSQVLESPATASAPSTSQKTIPAVSTNVAAASVASAAASPVDRKDYLARLQAAKLARQSGPAKVSPPHTSPPVTAASSATAISTPQATTTPTRKQPVTDEQKARQTELIKQRLEALKAQSKQSATAPSTQNLAPQQSLTKPPHTPATNVPTQQTSAPGFPGIPGLFMNSAPNSSNGTTTPSRLPQSAPQKRHAPSDTEASTPRGSVTPYNRPFGHSSYVQQEDSMIIEVSDDESNGSDMDIDDDQLSTGPPVIRQAPVSIPGFPPRQAPAPVSQSAVSTPGPQTPATIARTGELNTKEQELAALKLTLKKKLAEQKRIKEAAEAAAAAASTSSHGTLSNQHQAQSSSATPAQKSQSASHARTPVAHATVQADASAVDSSRDKKRRRRTEIQEQLPSLDDEIASNEAEMARLARDLETLKANNERIVRDKERLTNELENLGIDTGGMSHADMRATKNEIERAMSPETDTVPRTASVLSRSILPNGESKAFASASADRVDDMGHAFASRAQPLVGSQANPRYGFLPGIGQAAPQTSAPAVSHPPSHLVQEPARSAPGDLQAGTDVNDLADTAVNAQAPNDRASATPMDDEEDFYSPPPLAEVSVGAEPSVTELPEAQVESSVANAPSPSEEGEVEMSESSEEEEEYEPDESIVDESVLEPPTEQAQPLEPRVIQSQSVGQSQVSTEDEEAYEPPDIEEEMTDVAPATDALQVEASSPGDADDGAMDIATSSSESDDSESDSDGETHSELGESGSETHATQQDTLIADGLAPELQAETVAMTAPVVVQSDEMPVIEEEPEIPRFTPYESPLRMFKSYRYHPNFSQDVDGGFLSMTFSHQIDPETPLCPFESAGGSCNDPECPNQHFRGMGINGEKLLVQLGTANPGKTQDERQQWNNGLRSVLQDLRQKNIKDPNGIAREIANYRRQFLKDETRVVNL
>Arab_Me14_ctg01_-_Arab_Me14_ctg01g41t1
MSAPAHNGPAHVRNSPFARGSGSAAAPSPGPTPRPLSIGHQPHPHTEAKMAHARHQSLTHLSSPPLGRSDSRLRSDSNRSSVPIGTFAPQFISEDSPDMARPGGIVEGENDFSGKRYVWLRDPKTAFVRGWVVEHLAGGRLLVQCDDGTQQDVDEDAVDKVNPAKFDKAGDMAELTHLNEPSVIHNLHMRYQADLIYTYSGLFLVTVNPYCPLPIYTREYINMYRGRGREETKPHIFAMADEAFRNLVDEGTNQSILVTGESGAGKTENTKKVIQYLAAVANSDTPRAKSGAKNLTNLSEQILRANPILEAFGNAQTVRNNNSSRFGKFIRIEFSRAGQIAGAYIDWYLLEKSRVVKLNPNERNYHIFYQLLRGADPTMKQDFLLDSKDTEDFDYTKHGNDAISGVSDRDEWNTLIEAFHVMKFTEKEQAGILRTVAAVLHLGNIKATKESRRADQATLDSNAEAQARKVCQLLGVSADDFLKALLHPRVKAGREWVEKVQTPEQVNLALDALAKGIYERGFGDLVDRINRQLDQTGSGGDDSHFIGVLDIAGFEIFDENSFEQLCINYTNEKLQQFFNHHMFVLEQEEYAREQIEWKFIDFGRDLQPTIDLIELPNPIGIFSCLDEDSVMPKATDVSFTEKLHSLWDRKSNKYKRSLLTQGFVLTHYAAEVEYSTEGWLEKNKDPLNDNVTRLLAASSDKQIANLFADCADPDDEVGGTRSRVKKGLFRTVAQRHKEQLSTLMNQLHSTHPHFVRCILPNHKKRPKQFSAPLVLDQLRCNGVLEGIRIARTGFPNRLTFVEFRQRYEVLCKDIPKGYLEGQLVAKMILEKLGMDKALYRVGITKVFFRAGVLAELEDQRDALIRDIMIQFQSAARGFTQRRIAHKRLYRAEATRIVQKNFQVYLDLQSNPWWRLFVRMRPMLGATRQAAEVKKRDEMILQLEDKMQQEAAERQRVEDDRRRAESDMQKIQKTLESERALALDKEEIFKRLQFREAELAEKLQGAIEDQDQLEDQLDALMEAKKKTEEQAEIWRKELEQAGQIIGNLETEKQDLEEQLARLDQQLQELEAAQSKRSLAEESMSQEVKMLQSHLSLKERKLQELESKLLTTEQDLDIKLAASDKEVQASKKQIKELLEDNRQVRQQISDLSSTSTSYEDLVRRKESELAILKADLKKYESDRQTFDAEKQTLASKHDDLQSRLREANAELEAMRSQKQQSDREAADAKRLLEDRETEDAQSKLLQEQIELLKSEMFEVQKELSRERQSRDDVEMLGEHKYDTLKRDFDALNDSKITIEKEMYAQQDVLRRATETRTAHEQERKEYQAELRNLREQYLKLQEDKMDADAEAERTQSRLALEKQAARQEELNFKDQQLDQLEAERDDLAEQVHSLTQMLADAEGFRERNDQQKERLERELVTVKGRLTASENDNRALLNKVQQKNLDIARTNSRAGETQRSKIMQLTNEKSKFEEDNKRLYRQLEDAQVSIASMEKQKEKLELTLEDLNHEINREAKSNRTAEKASSTVNLQLADVNRKLETERQLRTQAQANTRAVQAALDNNNRELEECHNQLMLLRKVFDPESAEVAISYDAAKPQISKAVDVAERLEAANQALRVATERYNRAEAQLDDLRERHEGEINDLDTRHANSKRALLEEMNSSQVNQANANRSPTHRRLDSENRKPFSTSTPTNQRHISNATNDSARSDRTVDTVAFNNRMDMAAELELAQNQLQMSEMRNAHLQGQLDQSPARNNSWQEESPSMRRVQKLERENFRLHDMLDDSAKKVSSLEYNLRSGQLSYQEVQTKSHEELFELLNSQEQSRKSIVQAHNNAINELADAKTAFDDIKQMKTALEAELREVSAELDEYASEREQEQANHNQLLQEFADLQIRLDDETSTLLDVQSSLSLYKSRADEYFNKLEQAEIAVLKASRAEQFARTQAREAEETCATFMAERKEMDGMVEGFQRQVQQYEERVEDLSTDLQAALQAKKRLQNELEDYRSQHAHDIEDGETSLEQTRKKYQTELSTLTNELDQERETIIYIREENGRLREEIEEMRSKWDDEVLNSSTWAKEKNRLEMTLHVVSNSRDEAANAHNEAQSKIVNLLSQVRNLRTNVDDLAAERDSAIEEKKRLETRLQEAADRLDDLSRSESPAMRNAAAYDRELLELKSGLAQQEDIAAAAVGKMRRAEALAQELQKDIIAEREANVQLHKEKGLVGKNLKDLQLRLVDLETKGYSGSAGKDVRFLHGRIQELEKALEDSESTRLSDSRAVRNVDRTVKDLQSQIERREKQNASVTEDLNKARDKISSLLSTIDELQSSDSGNQLAAKRAERELREEREKSVKLERELENHKNLRVERRSQLGVPGIAASDAGDARSRRGSSIGLLMGGEMGEAAPGEKKFGSFRSGLRRVSGQKGFFPYFRREVEEDVGGPVTTLKEEMKKQEGTVAAVKPRALVIAGAGMRRKHSYDTGVGLLEDIEEVESVLEKDSVLNQAFLGEDYEENEEEQGEDETLVEVDGELYKEKQVEIDVTDSEPETDNESLAEPQEDGCGVKRKRTIRVVIRSRAFI
>Arab_Me14_ctg01_-_Arab_Me14_ctg01g42t1
MVKAVAVLRGDSNIKGTVTFEQADENSQTTVSWDITGHDANAERGMHVHAFGDNTNGCTSAGPHFNPHNKTHGAPSDEERHVGDLGNFKTDGQGNAKGSVQDKLIKLIGAESVIGRTIVVHAGTDDLGKGGHEESKKTGNAGARPACGVIGISN
>Arab_Me14_ctg01_-_Arab_Me14_ctg01g43t1
MTSSLDQLKATGTTVVCDSGDFATIDKYKPQDATTNPSLILAASKKPEYEKLIDAAVAWGKKHGDNIEDQVDATLDNLLVQFGKEILNVVPGKVSTEVDARFSFDTKASVNKALRIIDLYKEQGIGKERVLIKIASTWEGIKAAEILQRDHGINTNLTLMFSLVQAIAAAEANAFLISPFVGRILDWYKASTKKEYTKEEDPGVQSVGSIFNYYKKYGYKTIVMGASFRSVGEVTELAGCDYLTIAPNLLEQLYNSTEPVPKKLDASNASSLDIEKKSYINDEAAFRFYFNEDQMAVEKLREGISKFAADAVTLKDILRKKIEA
>Arab_Me14_ctg01_-_Arab_Me14_ctg01g44t1
MATTQEAFRVQGKTAIVTGAGSGINYCFAKLLLDKGCSVLMADLALRPEAQQLLSRFETGAPRAVFQKTDVTEWKELERMFAVATAAFGDVDIVCPGAGVYDPPWSNFWHPPDTTVSRDAAGGGRYATLDINVTHPIRTTQLAIAAFLDSQARTGGKKKKKRKRVLIVSSIAGQNANLHTPIYVAAKHAMNGFVRSLAALDTRFGIRVNGVAPGVIKTPLWTEHPEKLQFISSDADEWATPEEVAEAMLRCLVDEALPGGSILEVGKEQTRKVEALNDPGPSGAGHTVSHLEGKYEEVYGLLERRGWGKSKL
>Arab_Me14_ctg01_-_Arab_Me14_ctg01g45t1
MSWLAYLSAAPIALIMLLRALSLVLPARLARQATFVAFSITAFLFLILCASYGVFASVFLRAIGYGGLSQWTVGRAFKWTMWLSTGITFRVDEAGGREEGGRRGGKEALDTRPAVFVGNHQTELDVLMLGCMFPPYCSVTAKSSLKYTPFLGQFMALSKTVFIDRANRATARAAFDSAANTMRNDRQSVFIFPEGTRSYASEPTLLPFKKGAFHLAVQAQVPIVPVVAANYSHVLDMKSKIVRPGVVDVTVLPAIPTTGMTAADVDGLVERTRNAMMDELVRLSHVSGSKQGNGVPLPRASGVEQFRKELRQRS
>Arab_Me14_ctg01_-_Arab_Me14_ctg01g46t1
MQLPRRSVRSIQELPSIYTVFPPHYKPVRTHSASTFSDSARSPDIEDGLEVVPLELCTDYSALSVSACLDEKEVFIMEQREGLEKPLPSVPKSAWGRTWGRMSVKYRVLAVLGLQALLLLTVGIALLAAGPKRSEDNHSEIRETGSNETNTATTSTLERGTFMVPIQFPQQQSSKCLARANESRAWQCAFDTMLQLSILPSQGEDADEPIMITLGLPSTSNRSVHCGQQAPEIGPTALVALDGSGDEAQYRFSAIYSRTVILREDQLGQEKTNSSPMQGQPRHTIFQPGLSLWRCRFNDTRLEGSIYAEKGGGSVSNVTDAAPEASRRLPYKLQLLEQRVPATGSVPYCERVVVGVDGGLEERNEKVSLEVSDAQSEAGSDEDQADTSCQCQWLIE
>Arab_Me14_ctg01_-_Arab_Me14_ctg01g47t1
MRFTSYATASALAALASAQTFTDCNPMEKACPNNPAMPQTWETDFTAGKDAIKGWKQTAGSLTYSAEGAEFSVAKKGDAPTIGSEAYLHFGYIEVKMKAAPGQGIISSIVLQSDDLDEVDWEWIGGVDSKTQMNYFGKGNTTTYDRMIEADVSSTQNEFHTYALNWTSESLTWIIDNKPMRTLNYADANGGKNFPQTPCNVRLGNWPGGDSENEGTRQWAGGEVDYSKAPFKMTVANIKVINYSPGTEYHWKDKSGSFESIEVVGAGNKDGAPQNNAVLESSASATGSGIPLESGFAAPSATGSVGSGNSGSNNSSTTCTEGQQQATPAPASGGNSDFNYPVPTGSAGTGDETPCSCGVATVTVTGTPPSGDAPPATETPSAPASSPVEGGTATPPTSTAIVSSGLPNQPPATLTSVVSPPPYATTGLIMDTLPAPSVPATLPSAPSTPSGVLPPSSGNATVPSPSAPAEFTGAASANKAGVAAMAVVGCALLFAL
>Arab_Me14_ctg01_-_Arab_Me14_ctg01g48t1
MASAAQKKLVVCGGNGFLGSRICRAAAHRGWSVVSVSRSGTPHWSSVTSSADAPPWSTKVTWAKGDILDPSSYNAHLESADAVIHTMGILLEADYKGVVSGRESPLSGLKRAFSATKAGTQNPLDRKDGETLRPMESDGQLTYEVMNRDTAVSLAQEASKQNVPTFLYISAAAGTPILPKRYITTKREAESIISTTFPTMRSIFIRAPFMYDSSRTFTLPIAAGGAVASMINSAVGGRLTWLMGAGGIKPLKADLVGEAVVEALEDDQVRGPVEVPEIERLGTRAWRKNML
>Arab_Me14_ctg01_-_Arab_Me14_ctg01g49t1
MPAPAPNKRVKNKRISRNIIIGSEAWALPPLGHPDRPKGIPDDHTKRWTVYVRQPDGDPSLSTWLNKVQFKIFNTYENPLRTCDNPPFEVTETGWGGFSIDIRLHFVPISGEKAQYRQHFLQLEKYGSEEQQAQQERTGCVRSEFLEVVHFNEPTEALFDALTAEDQWAHLVPSKSSSGSKKASLGANGRLKRGLPNGERSAQLPEKGGDDVPFSQEHEQGLIDSLMDKIAQVDRELEKETARREKTENTLKALREELGHEAAQQAAQQASGDRSRRRKRNTTTQAKPVFSQVHNSFIEESYLFTEKTPQQSVARLLLRPTKTKDTSTP
>Arab_Me14_ctg01_-_Arab_Me14_ctg01g50t1
MANTQEDAQPQHQSEEIQVPQIPQTDEPADENDDDIDDLFDSDDEDAPELIESNNPSDFTKTYNRQRKLNDPSVPADYKPKNNPQKPSANTNLSLDDQVASLSKHASKIRLDSRFSGATGGGARDKDKADRATTEQVLDRRTQMILLQLINRDTISELHGVISTGKEANVYHAISESPEDGEQTHRAVKVYKTSILVFKDRAKYVEGEFRFRQGYSKSNNRAMVKLWADKERRNLARIHDAGIPSPEPIALRTHVLVMGFVGDRKGKPAPRLKDVRFDGLTSEEEDAKWTDLYIEMLAYMRILYHTCRLVHADLSEYNVLFHEGRQWMIDVSQAVEHDHPRSLEFLRMDVKNVSDFYRSRNVEVLSERRAFAFITGEKGEKEVKDMEAISNTVREVMKREPQTEEEKKRDEENDDVFRNQYIPQTLDQVYDIERDAALVNAGEASSLPYQDLLANKVVREDNDGAEAGDSGSGGVDLSSSDESDGSEVDQSIFDKGPSRGKKNMDKEEKAAHKKAIKAEKQEKRKEKMPKHLKKKMVSSSSRRK
>Arab_Me14_ctg01_-_Arab_Me14_ctg01g51t1
MKFSILTIVPLAALAAAFPSPQNADRPVATGSCCVANTSLKQDVCNVNGQSGRCVPSAANNCLFPYLDMAGVRRLTNLTGGGQLTCIEDNRLQCDANTLKRGRPLCRLASEFGKIN
>Arab_Me14_ctg01_-_Arab_Me14_ctg01g52t1
MHLNLRTIGAGLALLMAVVSGSSPFGSLRSRAETFENPVIWQDYPDLDVFRVGDVFYYSSSTFAFSPGAPVLKSYDLVNWAPVSHSVPRLNFGPRYDLNNATDRAYVQGIWASTLQYRESTDTFYWMGCIADGPTYVWTASGTNAAANNGEVEHWNWTSQGTLPRCYYDNGLLIDDDDTMYMAYGKTTINVAQLNADGTAEVKTEPVYTSPDEVYIEGSRMYKINGTYYIWVTKPADDEYVLKSDNVWGPYERRVLVDSIEGPLSSAGNAHQGGIVSTKDGQWYYVAFLDAYPGGRIPVVAPLTWTEDGWPQVVRVNNEWGKTYPIPVHTNKTVPATTGVDSFHGSSLSHEWEWNHNPDDSAWSLDKGLQLQTATVTDDLFTARNTLTRRIPGPKSAGTFRIDVSGLRDGDRTGAVLFRDIAAYIGILKSGNTSSLVMVDELTLGTNWVTNSTGTISATGPVLAPNVTEVWLRIEADITPAFSSTTAVREATFWYSTDGESFTQLGGPFSMANTWQFFTGYRFGVFNFATKALGGKVTVKSFDLEQL
>Arab_Me14_ctg01_-_Arab_Me14_ctg01g53t1
MENFEAFLENATSKASNVIPGAVLAVVDKNGNYIYKKVSGANGVHKDAQPLEFDQTYFIASCTKLVTTIAALQLVESGLVTLEEPLDRHLPELASQPIVTRTQHGQLEYHQATVPITLRHLITHSSGTTYEWLDPTLHAWRASRGEAPALVVDGDVAKGYAVPRTFESGTSWNYSGGLDWTSLLVERLTGTTFEAYVEENIAKPLCIQTFTWHLSHKLYVAEKRMRVSTRKVDGTLEDGPNPFWPEPVKEGGGAGMYSNVHDFTRVLADLLKDSPVLLKKSSVDEMFTPQFTPGSSALRDLHANGAVYQCTLDDSMEGVFANQGLGGLLVKKDVNRENYFRPAETLSWSGLPNLAWSVNRERGLATFFATQVAPWADRKTWDVIARFETATWRNLSA
>Arab_Me14_ctg01_-_Arab_Me14_ctg01g54t1
MPSQSSYLRPGVLALGLAATSSFVAAAPCDIYASGNTPCIAAHSTTRALYSAYTGALYQVKRGSDNTTINIAPKSAGSVANAAAQDTFCSGTTCLITIVYDQSGRENHLTQAPPGGFNGPESKGYDNLAGAIGAPVTLNGQKAYGVFVSPGTGYRNNKVSGSATGDAAQGMYAVLDGTHYNGACCFDYGNAETNNLDTGDGHMEAIYYGDSTGWGSGAGSGPWIMADLENGLFSGQGAKKNTGNPSITSRFVTAVIKGGPGKWAIRGGNGATGALSTFYSGARPSGSGYNPMHKEGAIVLGIGGDNSNGAQGTFYEGVMTSGYPTDATENSVQANIVAAKYATTSLVSGPAYTVGDSVSFKATTAGYTNRYLAHTGATVNIQVVSSSSTTTLKQAASWIIRAGLGNSGCYSFESKDTAGSFIRHFNFALHVAANDGSKAFKEDATFCPQSGLSGSGSSLRAWGYPTRWIRHYLNSGYIASNGGVHGFDAAASFNADATWATSTGLA
>Arab_Me14_ctg01_-_Arab_Me14_ctg01g55t1
MRLQSSLLSLAAATTVSLASPLLTYQADQKVGYLFTNFPVNDEQVYMHLSVDNDALSYRQLSYDGTLETARILESTIGTTGVRDHFIINAQDSSKYWLHATDLKVNALGGDFINATRFGSRSIVVWESTDLATWSEPRLSAPLANVSAGNVWAPESYWDHTRNEYIVIFSSRYWDPADVERTGPSPPNKLMYVTTKDFETFSKEQVYFDPGYPVIDCSLIPVPEQGENVWYRWVKSEVDYRIWQQRSSDGILGTWSNVGDAPDGTRVTFADRYSNNEGQLCFRDNQDPGLFHLWIDQSSTETYIPAQARTLDDMAAWQLSDTTSFTKNTKHGWVFPLNQQQYETIQAKYKFI
>Arab_Me14_ctg01_-_Arab_Me14_ctg01g56t1
MKYIAVALALATAVAGHGYVNNATIGNKPYTFYQPYQDPYTSPAPQRISREVQGNGPITDVTSADLQCGGYTEGGIVGSKPAALHAEVAAGSAVDLYWTLWPDSHVGPTVTYMAKCPDAGCNNWMPSATAVWFKVQQTGRTGTSNTWGATPLMKAGGVVTYTVPKCIPSGNYLVRHEIIALHSAYSYPGAQFYPGCHQLKVTGGGSKSPSGLVAFPGAYKGSDAGITYDSYKAQAYTVPGPALFTC
>Arab_Me14_ctg01_-_Arab_Me14_ctg01g57t1
MVINYSKWDALELSDDSDIEVHPNVDKKSFIRAKQAQIHQERDHRRHQIKTLKYERIINDGLTERIDRLLTALKSHKSKLADGANEDQLVFQAMMESMLDMKENAPPPPPEGVHEHIKDKPTYPQMMASMVDIVKKEIDASKSTDSRYDQFIAGLHKEKERVEDLQKQLLAKLAELEKEDKRHITSDDIKDGFSHSSVMKADQKKPASTPSSSTSRTETVELLNAPKRPEATRTDTGDSGADADIEEGTAAHDDDDNDDDVEASPLAKKFAAIKAGDWYACLQFLMQHSEILKESETDGLLVEAFNSELDGKPKHARQCVHQGLLLQYCRQLGGRQGVELFFKRIQSKDHQASKMFNDDVDSTYHRIRTRAAEILKERAENPAGAEGVEQIQLHAVDPGTTINIQVPPEKSTAEDPQEREMEIMARGIFETFPPGLQRALETGKLDEINKVLAKMSVEEAEEVVEKLGEGGMLSVEQGVIDATTEEGQKTFEEIERSRKMPGQE
>Arab_Me14_ctg01_-_Arab_Me14_ctg01g58t1
MAFTEDSLKAKLSSLNETQDSISTVGQWILFHRRHAERIAAVWLQRMKESPPNKKLVLIYLANEIAQTSKMRKKEEFLRAYEPIITEAATVAYKGSPHDIQNKIRRVVEVWRQRQIFNQAVQQSIEKSMNDLDSSRSVGRKPALGGSLFSSSTIPAELAPVAPLATSVNKADLAAKPAVATANQEYEKVTNPNYTIPSAPVHAAGLSTLVKKLAVAEGAAAESIKARQALIAGLEQLLATNKSKLEQDQTQVDDLKTRKDAIESRKRQVEDAILQGLSAIETNRISAAPLPAVTTSPTGQDRPRVEELTPPPMESFTPVGSPQQGPAQVVEPVPDIGDDVMPEPVSNPVIPETAPAPQGHTTMPGFATSMGDTNVPHDLLKSLQHARPGHEGGVYGQHSYETAAKKRKMSNHAEDEYAAFAGDGDMEGIDSNLGELI
>Arab_Me14_ctg01_-_Arab_Me14_ctg01g59t1
MADRFPSLDEFDAGQSEARGDATNFDALGDDANDDFLSRERAILGDDADQFASENDKLATVEDGDDDLLGGDFGGQANVGAQEIGGFESSFPAIDTTNEHMAPGGTITGPTLPFLPGQPAPSFTPQRSDSPEPDVIREWRERRELQIQHRDEVSAERKSKTIQEAQQNIDDFYENYNNKKDKEIAKTRKEAEEFLANRDDTTAGGTSWERIAKLVDLSGKGTKGGASGSEKARFRELLLSLRKDDKAPGSTGY
>Arab_Me14_ctg01_-_Arab_Me14_ctg01g60t1
MSEKKDDMSPVVLAPSVDEGQMAVEKQMHDIGADLYLEVRQYTREELDAERKIVLRKIDWVIMPMICMTYMIQFLDKLSLNYASAYTLIPDLGLEGQRYSWVAAIFNFGYLFWALPANYLIQRLPVSKYTGSMILLWSILLCCHVAAKNYAGMLVLRFLLGMFEASISPAIMNIVSMFYTRSEQPLRMCVFLAFNGMATMVGALLGYGLGHVHSPHITTWQLIFLVIGLVNFVWAWVFLWMMPDSPATAKFLTHKQRIVAIDRIAGNMIGVKTKQFHKSQALEAFMDFKVHCLVLIGLGCGVINGGVSNFASSLIRGFGFSGIYATLLQLPTGAIEFLVVPVCGLAAGYFKDSRCLILALICLPPLGGLLGIRLAPLSQRWSLVGCTWLQYIVGAPVILSWNLLTSNIAGHTKRSTANGLWFVFYAAGNIAGANIFFAKEKPRYFSALTGLIVCYCGMFAVAVFLRQYMWWENKRRDKKFGVGEDEQAIRDGFNDQTDLQARHFRYAL
>Arab_Me14_ctg01_-_Arab_Me14_ctg01g61t1
MPETTKVVPLTCHGHSRPVPHIHFSSIVDEDQFYIISACKDGNPMLRDGVTGDWIGTFLGHKGAVWQARLSSDASLAATASADFSAKVWDTHTGEALHTLSHNHIVRAVAFPNQPNPQILATGGMEKKLRIFDLSQGDSAPSYEIGAGVHTGTIKSIVWTSDPNILITAAEDKKIRWWDLRTQSMIGEYAVEGVVGTCELDNTSPDGILSVAAGNSVYFFNSLQPGSLIKTIKTPYEIASVALHSGARRFITGGSNQNDTWVRLWDFDEEKELETNKGHHGPVWSASFSPDGKLYATGSEDGTVKLWKYTAGAYGLWR
>Arab_Me14_ctg01_-_Arab_Me14_ctg01g62t1
MFNTVRLTTSLLRSLRPATLNSTKYFSTTTRTMDAYKKAGNRKDEPPQHEMVHFAGLLSSKREFGDFRTVLHTGLFSQIVAMEVPVGGDIGDEVHTVDQILMFTSGRGLATVNGKDQEVKAGDVVVVPAGTQHQFVTKGDTPLELITVYAPGEHLPTSVHKTKEIGDKEEEDGIDEAPEWSQKSKKENVDKGLVNESGKY
>Arab_Me14_ctg01_-_Arab_Me14_ctg01g63t1
MRGTAAFVAKAWHGPGPLFSSLQPPRITTTSPISVLSRALNTKPTPAHIATPQARCASRCASSLFPSSAALRFAPVGATRRNVFQQPMRMLTASRTLAEAQVKTPTRQRKSYKKEMEEKGAVDLEENDGEPEESQGFVKSEKATAARQVNLSAKLSKEGSSKASGGMGEIWRLIKIARPEMGTLSWAFVFLLFSSAISMSIPFSIGRILDAATQAEKTDGLLFGMDMTTFYIALASVLCAGAAANFGRIVILRIVGERIVARLRSQLYRKTFVQNAEFFDANRVGDLISRLGSDTIIVGKSITQNLSDGLRSLVSGAAGFVMMGYVSLKLTGILALIGPPVAVVAFLSGRSLRTLSRKIQKNLGTLTKIAEERLGNVRTSQAFVGEVQEAARYNRQIKRIFQLGKKEAVVAAGFYGSTGLMGNLTIIAILYVGAGMVKSGVISIGELSSFLMYTAYAGSSMVGLSGFYGEMMKGVGAASRLFELQDRQPTISPTKGEAVRSARGPIEFKNVSFAYPTRPAVGIFKDISFKIDQGTNVAIVAPSGAGKSTVASLLLRFYVPTAGTITIDGRDITALNAKQLRRKIGFVGQEPVLFSGTIAENIAYGAPQATRAEIVAAARKANCQFISDFPDGLETHVGARGTQLSGGQKQRIAIARALIKKPDILILDEATSALDAESETLVNQALGKLLAENNTTISIAHRLSTIKRSDRIICINADGQVAEEGSYKELSSNPEGAFSKLMEWQMSGGEGDTQSVKNPRPTEEGEIERELENETEEEASQNRV
>Arab_Me14_ctg01_-_Arab_Me14_ctg01g64t1
MQHKLPHTATSHPNDPIPREPRELPQLALKPAPPSAQPEHPSPKSSGESMLWSQNSSDDSEAPMTPNTEPDHAVEELVDKLQDLPAAAVNFNGQTRPRRASTTLISDSPTDIRRILGDGETATKLISQCCGGGCCLLKTLQPDTSSSSSVPVVVPDNVAFSSLHLKLGPLALDSELTDTTPLPPLTMSFEPLPSKDIKHVSEVHKTPPKFVQPHPPYDVYSAPLYHARELTKPGAEKRTIHFDIDVTDYPDEGGVDFKVGGAVGICPPNAPHMVDDMFDLLGVPKFLRDKPVTLKTKTGRWPTIWGEDQPRELLTTRRELLTWCVDIQSNPPTKNLLRVMAEYADAPNEKKILEYLCSAQGQAAFCDLRTTSHLTVPQILSAFPSSKPPLPSLLSVLTQLMPRFYSLSNDPHISSARPGLPGTRRLIEMAVTIHEAPDWHAPGATRTGVGSGFMERIAHQFITAESEGVDPRSILDIRVPMFRGLMANPLSKQFGGEGPMVLIGAGVGMAPFRGFILNRLKNANCANKIWLIQGVRDSMLDELYSGELGDHEREIKKVVQSRKTRVSGQTEAKYVQDEVRMQADIVWFVINALDGRIFVCGSSKGMGEGVEEALIDITMQKGNLSREEAHEFWANKKNDGQYIAETW
>Arab_Me14_ctg01_-_Arab_Me14_ctg01g65t1
MVHQRGLLDLPAELQVHIAAYLVAGVEYAESAPNLLHLALTCRRLAPVVREVLCLAPVLQSSKAHLLLYFLFKYPNLAKTIKSLTIETRETWEAKTYPVPIPRLEPDVLDHCKRHLRTLPIRKWTQDTIIASLDAAHFKDHGLLLSLILTLVPGLKKLYLGGSILLNFPIFHAMIFSEPEAPTKPDWTEGPDLSWVVALIGPKLTALELPIDFRRTVEDSIWWPSSISQIPEFFPNLRWLSLPHMAATKRARGSCCDMIPRSLEALVLTDARCTCFEPWSTRLVDEATATSLFPALARISLYHRYATAPTHDTVTTSLAHAGIEVREYVPDCCLRSGAEFHHPWKYTPAELDALSDARHAGYAVERDRAALQCGSDEE
>Arab_Me14_ctg01_-_Arab_Me14_ctg01g66t1
MSATHHTPRSSPLLALPAELRNVIYGYVLAASKRIICAQFEIEEDHAHKYYEKGVQVRTSGIGASPHNSKATVESNQLQHVCRLLRRETSSFVPSSHIVFLRRSDKHSIKTASVTCSRWLDTLARSHIDALRTITIHEGIPWGVADHDFAACSGIFDLNAVEHLARFCSSSPHIQVKIYLARFDKQLKGFCRRSLIGYIVSMAVRKEDCCAAYGCTSGEARAVEDAVERMSSVWGGYAKDKPPLPENLRLFPVGQFQCDDWPTNKSRPELRSRIKRWYEEGI
>Arab_Me14_ctg01_-_Arab_Me14_ctg01g67t1
MEDNGKAPMPVIGTNGAGVRRAVDEPIVKVQPPRREDLQPSYARVIEPDDADADNHGWYGGMVNALGGIVGTLGAIPCCFCCPNPYQPVSQGNVGLVTKFGRFARAVDPGLVYINPLSEKLLQVDVKIQIVEVPKQVCMTKDNVSLQLTSVIYYRITSPHKAAFSISNIRQALIERTQTTLRHVVGARVLQDVIERREEIAQSIREIIEETTAGWGVEVESMLIKDLIFNQDLQDSLSMAAQSKRTGEAKVIAARAEVEAAKLMRLAADVLSSAPAMQIRYLETMQSMAKSANSKVIFMPGPASVGDLATAMDAAGPSGQQTDPIQHTVNARVLEEM
>Arab_Me14_ctg01_-_Arab_Me14_ctg01g68t1
MPPRDANWIDGLRGIASFMVVCGHLCTALVPWLHSPAPDAKTAPHLFQLPFFRLAVGGRSAVAIFFLVTGYVNSIGPISKSRAGNHDAAFTGIARSALARSGRLVLPTMAATFVTWFMANTNAYHMTKHVDSTWIRQGWHRQEPTLWAAFTSLVKVETETWTVGWNEYDGTQWTLHLFLEGSMLVYTTMFATVMVKPKARMLIYAVLYIYFWQMGEGLAIGALKGLNIVTGMFVAELHNHYKDSATSVLPAPIPAMMIVFGMFLAGYPQDSPQNAHWSHIMQKIMHSITCDKADVRRYWDHLGASTVLLGIFFSARARKVLTSPVFNFLGRVSFPVYLLHNTFIKSVLTWMIYLPSAMNPPRNEKGEQLDLQRGSTTHIFIAVVVFFYLLYRCAALWIKHVDPICANIVNAATKWAYGEPQQREPRPILSNGSASPKQTSVLPS
>Arab_Me14_ctg01_-_Arab_Me14_ctg01g69t1
MGVSSSQPFPSSQDPVLSSNTAKNVTTPSLAERVPRCTPTMDDEAASQQLMSEARALHTTDHDGPAIPLLLDGASQDTITKTPGSSAKKAKKPRRKPPTASHNNLQDAFPGSSLPSYSLKELQAFVGPSPSKKKTSASTIPSTQIEVPATQTESQLNTAPSTTPLTTSQAATTSSSKKKKSGKGKENTQAQTNLHNDMQEEKTQPDVGSPSAGVKARNPRRKRQALNSQAELADTLIEQDTIPATPYEKTTEEPIAPPSNPIEGQTSQKRRRKNKPHSSVNSPDFDSNKIVETSIAEQEEAPGATAEGSRDHVGASNAEEQPLIPMALLDNLKAERLQSSPAGSALRKTQKLPENKSDAEAEADLPDAVETTTPIKTPGTAQSTKKRKRSRKDKQAPKTPLLDWDPPVRSLDDPPTQPFNYEDMDELELLPENDNQSDSKTASCGSRRKRKSTNSKKASRPSVGGLARTPSHRSSRSRADPNRNYQRDHDDDGRTAAEIALDSSHELGQPPDKRTSGEYTADEKELLRRAIRDYQERNGLEVADLVEIIQWTHVRRKEMGSNTTDQTEEQYKRDSSVFWDDVGSAGLMRQSSDIKRHVRARYHTCRRGHWSQEEDEILRELADSHPGQWKLVATQLNRLELDVYNRWKDYVRHGESRMTKRWSKDEEEKFVKVLSTVCQRVEDHLAETGKPPLDDYTPVINWHEVCREMGDTRSRLQCQSKWKQMRAREPPATVGVEIKPRKTPEPGQVGVEEPQKKRDKSRAKKEGESAGAIAEASPLGPEDMLWGDKFDLVGHVVEQVVADGCETESQIVWQDIAEQMKQTWSVRTLQKAYKELRELVDEQEDLTASLGALLAYMNENHKSEMDDRYIPLPELDAGGEDAPVSHSSQKRKRMSGVGSGKSTAKRNKKGTPSTTKAYKSKELITDSDNAESEVEG
>Arab_Me14_ctg01_-_Arab_Me14_ctg01g70t1
MASATGIPPNAAAARGQSEEEPLLGRRGDASQPDGQPLYQNLWTGTAAIAQGGIWILAAIVWGSILSQKLIFFSAHPLLNSAGFLLAIQAALVLQPTHTPEQKRSGTLAHVLFHVGGASALTAGLVIIELNKAGPGHEHFKSPHAILGLTFYILVYIQAIVGFTQYYTPSLYGGVDKAKSIYKYHRISGYVIATLGLATICAATWTTYNLNLAHMQHWAVIVASVLVLAGTVPRIRLSKFGLKKDEGQIRLQS
>Arab_Me14_ctg01_-_Arab_Me14_ctg01g71t1
MRTYTHNPTPNPSQRPSNMCTSYEFNYLRCQREVKRNCKHTDHFRCESGMCKDDDHVHATLTRAEKCPVHAMGEEKKSKRAAHKDRERCEWPETNCRPM
>Arab_Me14_ctg01_-_Arab_Me14_ctg01g72t1
MFGKAAILNALVSAVSAGTILWDGRFNDFTSSSDLNKWSWANQVGPYQYYIHGSGPVTSYVNLSPSYKNAGDTNSKQGAKITIDSTAKWNSDMWRTELIPQTKAAINSGTVYYHFSIKRGSTNVPSATNEHQICFFESHFTELKYGWISGEQGTSNTNLQWMVGGQSKWKVELKADEWHNVVYEINFSSQQVTFWHSTGNNTLVKTAGPFSASTSSNGADWHLGVLRLPRQGNDGTGAEDWYFSGVYVESGSLTTSIVSPK
>Arab_Me14_ctg01_-_Arab_Me14_ctg01g73t1
MPIFGSHSCAVTQPKSRLISGPMHARHVGGVSITGGTGGNTLLDSYFAPSSLEPDELPSHTYAASGRIEVPRRSNTFTDAVRRPSLSLKRSISRLRTGSHTRSSEGHKRSQSDHHATTATTRSDPTSTQLVQRKPSPIPARPNLSLDWGIQDSASSSESPELFVAPEPPPKDIPRVNPKISMYSMSANSVVTDYETPPRKEVPPPLPGRPRRADSVTTIGFDKVPAEERPMGFKEIAAVQNYKDRMVLYEKTRDYWANAEHGLAEWTGRTGGPRTTQLRREEKRTGYDCFPIVETRR
>Arab_Me14_ctg01_-_Arab_Me14_ctg01g74t1
MLRGAANQGARWAPSRNAMRRCLHSGLPLDLAAQAGSSAASRQQAGRWTSWEYRSLDRSLDRLQHAACRALGPGSNEARCSTLDGGRWQPERKRSTGADAQTLARLSRRGRVSDNNNSNSNSNSNSNSNRNATATATEQSSGAASRDSRRRPTQKNVLATARTTGSAPAKCWQRADGGLVQRAFLDDWDAAPVVWIRVQSSQCLVAVVAVVAVVAVVPGVAAR
>Arab_Me14_ctg01_-_Arab_Me14_ctg01g75t1
MDSERPHLSITLPRNFMFHFRDGAAPQTPEPEPQVADLQPPPPPRQTLKVRRRRATLVQHQVELDLSMQEKPIPTIEATDFHFCSSNALPSPPSALDNAYLSPPTSFGRLVSPPKTPAHQVRTIDIFDGPQHWDDLETNRSETSSRPTSSSGFSDSSISSRGSMYSYLSRGGSCTSPEEEMCDPFSFDSLEMKYNQPSSPLAAHQQPRSAKKLKLRATFTEEMDFHLWRTYMNYLQDPTVTPFKAVPLTTPPNGVCHRVARMARKTWKAPSVSRTAGVRAAVHFGSHSGTPDTVKALKSGSTTPIARPNKSYLRYPTEKQCRKRLRDLARQRPTLSAYYQRLLHRSPSPLQSSPPSDKSEEPCEPQPQPHQKPLSSPFGQDTSSFTFSTRDMNVSLATSTAASMQMGNPLSQLANDLTPRPEQKSWSRARSSAHQKSQSLHVGLGLGLSNVLGSPFQSSSTVEMADAGSSSHNAQTWHAHTGLPTPRLGSPFQLHAPRPKSRVFKRRALANSFEDKTRNRGNSTVDDIFGAPAESSHRRVRSRGFSLGDMMEGAGSRRLPLSSSGPPELNPFANLRPQLPSPVHTSPAIMTEAHRQGTFRLGTPFGGRPSNTFPRASTSYGGFEPPASFEQRFAAAPAPSEH
>Arab_Me14_ctg01_-_Arab_Me14_ctg01g76t1
MPSIALTLRTARTFSRSSTKTYLNLARNFSSSLRRNEINKVFPSAQAAIEDMKSDSTLLCGGFGLSGVPDTLIEAVKSNSSITGLTAVSNNAGVVGGGLGLLLESKQVQKMIASYVGENKVLEQMYLNGELELELTPQGTLAERCRAGGAGIPAFYTPAAFGTVVQTGELALRHNSDGSVAQYSTPRDVKVFDGKSFVMEEAIKGDYAFIKAYKADRLGNVQFRFSAQNFNGAMARNAKVTIVEAEHIVEVGDIEPNAVHVPGIYVDRVIQSTAEKKIEKTVNAKDPADAVNALGSGDAANKRERIVRRAAKEFKNGMYANLGIGMPMLAPSFVDASVEVQLQSENGILGLGPYPKKGLEDPDLINAGKETVTLLPGASCFGSEESFGMIRAGKINLTILGAMQVSARGDLANWMLPGKVKGFGGAMDLVSNPSMTKVVVTMEHTDKKGRPKILKQCEFPLTGKACVSRIITDLCVFDVDFTEGLTLIELADGVTVDEVRAKTGADFKEAAEIKPML
>Arab_Me14_ctg01_-_Arab_Me14_ctg01g77t1
MADARGEYWYFEPGVDSSKITVPELRSILLKHGVGYPSSAKKPQLVALFNESVAPQAAQVQRTHARTKRTTRGIVDVPSSSNSTVDDAEDDTLVAPTPATRRTARRTTRGATEDAEDAAPASRAKTPSRAVPAKHSRALEPEVDERPAARRTRKSITPAYKEPTPDPEAWHRSGPESPFTQENPFQSGSSPAVPDATSRDKSRRRTLGSELKTRRKSDAHRRRTVEPSADQYDEGIVVPSRKTFDVAAPHAKEEEHESTDAGEEFTPEEQLELVRDRAKSGQVDILPPRRRKQPSKATGTLKAFSATLLLTTAAVFGGVWRQEKVEVGFCGIGREATSLAGVEVPEWASDILPQCEPCPPHAQCYRALELTCDRDFIRKDHPLSLGGLIPLPPTCEPDSVKTRKVTAVANKAVEILREKRAQYECGEPDAEGKLVETPEVAEEELKQELAAHTQKGMSDKEFSELFDRAFPETVLRDEVVETKNATTGKRHLTSTSLAKLSLTCSVRRSVVQSFERHLLQIVIFFLLVASGTYGRYSFTRSRAMEARAKQLASDVFDRLANHAALSYQEPGAYPERGVSMAQLRDDVLRNEFSSSRRQKLWERVQKKVEFNSNVRAAVRTANSGDVARMWEWIGPMHLIEDGRSSGKRESGRFNIENTPPTASKEMTEKRTWNEGLPRLAPHIAKEGARKHQHNRQPVVLTNRQTKSVKMVNVPKTRRTYCKGKDCKKHTQHKVTQYKAGKASLFAQGKRRYDRKQSGYGGQTKPVFHKRAKTTKKVVLRLECTACKTKAQLALKRCKHFELGGDKKTKGAALVF
>Arab_Me14_ctg01_-_Arab_Me14_ctg01g78t1
MTDTKKKSVLVVGAGSVGAIAALNLQVGGLALVTVALRSNYNAVKEQGYTIESCDHGSLKGFKPSVVRNTIPDIVAENLPPYDYIVLCTKSVPDVGPTSVDLIAPALLRNNTHTALILLQNGLNIEKPFLESHPKTIVISGVSLIGSAEPTSGHIVQNEPDRLLIGAFPHPSICIDNASKKAQGFVAMYSAGGKTDCKYSPDVLHDRWRKLVYNACLNPICAITGVDSGRIRLADGGLEGLVRPAMGEIVAAAKAVANVELEEDVIDKVIDTDPMESWAKPSMQQDLEKGNFIELENLLGEPLREGKKAGVPMPTLEVLYQVARAIQWRTKERKGLVKLPGQ
>Arab_Me14_ctg01_-_Arab_Me14_ctg01g79t1
MKLSTFLITVFAAAAVAEPCTSKAPVSTPTERVEMCTKICAFRPIQDCGRGGYTKQQGKCWSCCKK
>Arab_Me14_ctg01_-_Arab_Me14_ctg01g80t1
MLDPTFHITTPRLHLSYLDPSNDAHMEYIARLKNSPEMRAMEAQTPARFNPQPLTLSTARAAQAAGAERLERTGTGRYIISLRDPDRAFTEQQEREYVGTVSMQLQRFPDAVCPAVPDVGFALLAAYQGRGFAREACTALMRYFSEVKGHVRFAGFTHPENLASQKLFTRLGFENRGVRLVDGVVVSDGVGVEVAVWVKGVPEDVDLASLNIGSRRAVGLVAGCRGEEADDLAVAGL
>Arab_Me14_ctg01_-_Arab_Me14_ctg01g81t1
MRSPEGSRQTWAAIWKSLFAVGIFAQVTILLAFLGSYLGFYTHETLPSSIRAFTSTSNNDGLTLRHIIHHGAGQPGPRARRLDVTSDRMVQAEAVGEFGPFVVKKASITIEKPSKIYKYDGQRPMWSTMSPLWVAEDVAGPDVEDKDTVISLASMSEDAYKPGPEDPEWMDVDENYNSSVPFGWDDSGIRGHVFTDDTNSTIILSVKGTTVAMFEGNGTSGHDKENDNLFGSCCCGQGGSYWWKQSCDCMTGTYSCDDKCVREELRKPNRYYLATVELYEEVLRIYPDANIITTGHSLGGVLASLIGLQHGIPAVSFEAYPQAMAAKRLGLPVAGDVAPLRKNTGGFHFGHTADPVYMGTCNGFSSFCSIGGYAFETICHTGKRCAYDVVKDWGWRQSTTTHRLRYAIDNVYKKYDKAATCVDEDVTCVDCFLWKFEDGTHTKPATTSTATPTSRTRTRTETCKTPGWWGCRDETSTIATATATATLTNPVITSPPESSISTCKTVGDWHFEHWYAVTDDSSLAGLAVKTKPPP
>Arab_Me14_ctg01_-_Arab_Me14_ctg01g82t1
MSATRHAGYHSGGRRSTELDVFSPNDAPDRASTLQPESETPTSQYPRGIRLILITVGLVLSIFLSALDSTIIATAIPSITTEFGSISNIAWYGSAYIITNAALQSCWGKAYNYFPLKTTFLLSILVFEAGNVICALAPSSVVLIFGRVIAGCGGGGIMTGAFIIIALTAGPEYRAAYMGVLGVTFGCASVVGPLMGGALTDGPGWRFCFWISLPIGFAAASTMFICFTSPLRPREASLREKLVQLDLNGGVLVSTSLSCFVLAMHWLGIHSSNSPRVIGSFIGFASLLVCFVINEWMMGDKAMIQSHLLKNKMVLANACYIFFLAGAYFPLLYTLPIQFQSVNNVTASQSGVRLIPLVLGISAFTMIANGLLTFWRHYKPFLLVGAIFAIAGNARIYTSNASTLTSEWVGYEILSAIGIGIALQIPMISNQALVPADNMAAVTSLTLFMENCGTALFVASSEAAFTNGLLSSLARNLPDVDSKNVLDAGATQIRSLFGGRELEQVLGSYLDGCKTSHIITVVCGATAGLISLSNAGPVAVTWARLRIRKAHER
>Arab_Me14_ctg01_-_Arab_Me14_ctg01g83t1
MPTTPVVAMVMAPIHLLTYSALLGTELYQSFIMTKVAFQALPRSAFTSLQKRVFPIYFKSQSLLLILVALTLPPYGPASVVHNKSDWVPLVIAGGTAALNLSVYGPRTLRFMVERVHQTTRDSKPLTDSKEISVEMKRLNRLFSKAHAMSIHLNLISIIATLCYGWRLSSKLSFEAA
>Arab_Me14_ctg01_-_Arab_Me14_ctg01g84t1
MRLTLLSFLPATLALPAILQSRADEPVYWLLAGDSTTATNGGWGDAFLATTVAEGSSGVNYGHSGSTTKSFRAGGDWDKVINEIGSNKEDYRVYVTLQWGHNDQKPTSGVTITDYKTNLATFASEASSAGATPILVTPLTRRTFSGGKVVENLVNETAAVIEVAEANSLHWINLNEASTKYVNAIGSAAADKYNLASGDRTHVNEWGGVVFARIMSDLLVGKYPEEFESVTKKNETLTALIAAGTVA
>Arab_Me14_ctg01_-_Arab_Me14_ctg01g85t1
MDKLDISHSNLAWTPDMFSFIYNSNPGRVVFKPGALSDISAELDRLGCKAALILSTPQQVNAAEQVTTLLGSSAVGIFSNATMHTPIAITLQALAQAEDKHADCVISVGGGSTTGLGKAISVRTGLPHISVPTTYAGSEMTPVLGETVDGVKTTRTDPKILPNTVIYDVNLTLSLPQNLSATSGINAIAHAVEALYAPDTNPVIRLLAKEGIHALAKSLPVIVADGANLSARSTALYGAWLCGQCLGSTTMSLHHKLCHVLGGLFNLPHAETHTIMLPHTVAYNAPAIPEASRDMIDVLPGADGDCVRGLNKLIDGLGMGKALRDYGMKEEDVEKAADYALRNPYANPRPIVLEKIRELIRRAWAGEEARSDL
>Arab_Me14_ctg01_-_Arab_Me14_ctg01g86t1
MGSKNPATSVPQPSLKDLNTDNITANVNLVNSSNPSPRFRFLLERLVVHLHDFARETRLSQDEWLKAIQFLTATGQICSDVRQEFVLLSDILGLSLLVDSIDHPKPAGSTEGTVLGPFHTHDAEHMEHGDNMSHDQNGEPLLVVCTVKDKEGNPISDVKIDIWETDSSGMYDVQHAGRDRPDGRCIITSDQDGEFWFKGIVPVPYPIPHDGPVGKLLDVLKRHPMRPSHMHFMFEKPGWDKLITALYLRGDPYETSDAVFGVKESLVVDLGEVDETTAQHYSGTHKGMKMLTYHFVLVTEEEAAQLRLEKTREATHKLNPTAEVENGFIGF
>Arab_Me14_ctg01_-_Arab_Me14_ctg01g87t1
MWNATYAESHQYYTLPELVPIVLKVLSLQHTSKVSLAKESTNSSAAFDGKSTIPIWLDGKEVVTADTFDVYSPLNQSKLYSCSSANEDDVSLEIQSAQKAFLTWSQTKPHIRRDIFLRAADEYKRRKDELRNYSLTETRASDAMFNVEHEAAYQACKDVAGLIQIASTGKMPIVSAEGGSSAVLNEPFGVVLGIAPWNTPNILGIRACLQPLAMGNTLILKGPEAAPATYWGIASLLHAAGLPAGCLNTLYHRTQDASKITNALISNPMIKKINFTGLTAVGSIIASLAGKHLKPLVLELGGKASAIICEDADLGLAAV
>Arab_Me14_ctg01_-_Arab_Me14_ctg01g88t1
MPLNIIIVGAGLGGLAAAISVKQEKPDHRVQVIESAPALAEVGAGLQVTPNATRLLKRWGLMRSLEKLASSPQEFTIHRYSDGALIGKRDNFGEEMLAKYKSPFWDMHRADLQIGMYERARELGVEFRFGALVKSTELETPSVTLSNGDCVEGDIIIAADGCPSPPIPTGDLAYRVILRVEEIENDELRRYFETPRVVLWAGPDCHAICYPLKGGSLINIVLLVPDTLPEGVARAAGGLDEMLEIFQDWDPRLKSLLTMVPKVEKWKLMHLDELQHWSNAEATIAFLGDACHPMLPYLAQGAGSSLEDGAALGVLLSRADHRQDLPEILKLYEQLRKPRSSALQKRSMIQVFSFCPLRCAVRPLIERRGTSITCLTGLNNEQGTIY
>Arab_Me14_ctg01_-_Arab_Me14_ctg01g89t1
MLHLLPSGLLGFGQGAAFLGICLTSYWIIPFLHGLTISSTRNVPGPFLARFTRWYEYFALLRGKSHVEYMQLHDKFGAVLRIGPNRYSFSDPSDVKIIYELGSKFTKTEYYHPLLAPNPDDQNIFAIRDPAFHKMRRRKIANLYSMSTIVSYEGAVDRMNKICMDKLKKYAIEDRELSLPDFLQWYAFDVIGDITVGSDIHAAYLQDLPDQFNESFRMMENEGDVTGMISGVHMANNYLAHAGIIPDVHPWVMRLQSLIGNKGAAMFLDFTFRQINKYRASNTKDTVTVGSDSFLGKLIYLQKEGKVSMSNILDACGSNIGAGSDTTAIGLSSIIYYLYNNADVLAKLREEIDKMAQQGLISDPITFQEAQSMPYLQAVIKESLRLHPAVGTILPRKVPEGGATLAGTFFPEGTDVGANAWVLHYSKDIYGDDAASYKPERWLEPKGTNDLRETMMFAFGAGSRACIGKNISLLEMTKLLPQIVRKFDFVFDNSSPPETYCAWFVYLKYNVQVKVRAIS
>Arab_Me14_ctg01_-_Arab_Me14_ctg01g90t1
MTTPSKSLTGKVAVVSGSSAGLGAAIVHELAQRGASVAINYPYPSEKTNAENVAKRLGRDTKAIIVEADMSTMEGPRILADKTAEAFGKIDILINCAGINRPMSLDHPDEASIEASWHEVVHTNGRGTFLLTRAALKHLSYGESRIINIGSGVSRAPGSDSSIYAGSKGMTESYTQCWAVELPRKYGCTVNGVAPGIVGTDAFYAAPQSLRDFLQPIIDATPVAPRIATPAEVAWTVAMLCEKEAAWLNGLYIPVAGGALIF
>Arab_Me14_ctg01_-_Arab_Me14_ctg01g91t1
MASEILSLPFAFGAILLYTLYRIFCYIQFHSKYRFPNHVSGRLPLLGNMLQIPKHPSDQRPYFASLARKYGEMFTLKLGSQYWVFLNSHRVVGELLDKRGALYVSRPSLPMVGDVASGGKRVVFLPYGETWKWQRKVIHEILGPAEKSVYGPFQDVESRALLHGYLTQPDDWHLSNAQYSSSVIMSMVFGRRTTLNDETTSRIVAVNDELTKAFEPGSNLIDAFPILGQIPFAKSLQPWRWWGDNLYKTALRNFNSEFDHLVERQKSGKVPKCFASEFLRLGRDKNVSHEDMVFLFGSLIEAGSDTTRVSLNQLAAAAALFPDWVARAREDLDKICGSNAERLPNADDAPDLPYIKAAAKETVRWNPSFGEIAHSLTKDDEFEGYRFPAGTTFSWNHWGIHNDPSEYPEPERFWPDRFLNKDIDKPIKGHLGFGTGRRVCPGWHVASNSLFLGIARIVYCFDFQTVPGEPIPVGKPFSIGMSKPYQVKVVVRSPAHAELIKRECASAV
>Arab_Me14_ctg01_-_Arab_Me14_ctg01g92t1
MHITPSTLFPRNYQMSAWNYDHTRFEAEVFELEVLGQVPADLHGAYYRVQPDHAFPPMFGEDEVPLNGDGNVCVFNFQNGHVDFKNRYVRTPKFEAERAARRALFGRYRNKYTDDPRVRDVLTRTTANTHVIYHANKIMALKEDAPPFEIDAATLETIGMVNYNGTFKCPTHTAHPKADSTTGELVGFGYEAKGDASPDICSFTVDKSGYLTEEVWFKAPWACMIHDFWVTENYVVFPINGLKASLEQMQQGGEHFFWDENLDHQLLGVLPRRGAKPEDVKWFKTAKGCYSHTINSYEEDGKLVLDANVWTDCVFPFFPNSKGKKFHYDPRNVRSPILRYRFDPKGSSEEMVHPENVIVEGVNEFGRVDDRLLGKKYNRYWILTIDPTKQVYTNGTAAQAGFNTLVCHNFETGKSQSYYHGDNITFQEPCFVPRSENAAPEDGYIVLLADLYSESRSHLLLFDAQEIEKGPLAEIKLPLKLLDGLHGSWVDGKDIELATRGKR
>Arab_Me14_ctg01_-_Arab_Me14_ctg01g93t1
MVQFYADSTLQKHHNHAFQTVPITNQDTVLPPGLDTKTFERVLVKLREVVGDDNVAVGEGLRDFRDPYPLQVDENQPSAAACPISVEQIQGILRIANDFSVPIWVCSQGKNFGYGGPAPRQSGSLVVSLHRMNRILEVNEKFAYVLVEPGVTFFELHGYLKARKIPLWVGAPALGWGSVLGNTVDRGIGYTISGDRHRDIRSLEAVLPSGEILRTGQWAVNNSPSAHVCNNNFGPQIDGLFLQTNLGIVTKLAVGVDLAPPAFMNIKLHGPQVEDLGPIVDSMQQLWLEGVLQNHGMITNINHFASHDLPKHAHQKEEGPLLPDTITKLKEKYRTGYWRASFDLYGTPEIINARLARVKAVFATHTPDLDLETTFFEGKDGGPVDALDVGTLSAGVPTMVPVKLADYNLPADNSGAGGHIDTTLILPADGKTVVDWFAQAKKIMEDEGVDPFIGCHVFRHYILFVQEYVFDKTQATHRERGLRVVKSLLSAAKAAGFANYRSHVQNMDGIQDLYSYNDHAYRRFVETLKQAIDPKGIVAPGKQGIWPQRTLGKAARGEPEKPSTP
>Arab_Me14_ctg01_-_Arab_Me14_ctg01g94t1
MSCSACYSGHDHAGPTTGSEATMFELDVYITEPPESSAERSQNVIVLFSDAFGWSTTNLRRLADSYARRTGCRVYLPDFMYGGALPAWVKSHMDRITGKSSGIRDYMMKPILMIQAAYYIIPFFIRNPAHKRYGLAVDFVSRLRAQLPTGAKIGAAGFCWGAYATTHLARCDNISNGNLPLIDAAFTAHPSEVKVDDFSGIKVPYSLIIGDIDFAMKIEDVKKVSEILASDTTLASEVVVLPGARHGFAVRGNPNDASEREMADQAEDQLVRWFSKHLH
>Arab_Me14_ctg01_-_Arab_Me14_ctg01g95t1
MTDRTPTTNRALWLHSFSSPLKMVDLPVPHATAGSAVIKVLNTVIVPYTEEIHSGRLPIFNLSLPLVPHPSHIGRVHAVGPDAVSLRPGDLVYFSPFITARDDEDLFVIQGHHGGEDPMAKQLMDGEWRNGSLQQFQKIPLENAFVLNTERLCDFLGYTPADLHEISFYAMGVGAISEAARVCASETVLIGPATGTFGGVSSEVALALGANVIAIGRSESKLERLRNQLGNHERLRTIVMTGNAEADTAAIRAATPGGRGVDVYNDWASGGLEGSPFFAAAIRAVKRRGRVVLSGGPAGTINVPYAFVMHQDISISGKLGVGRIGIKLTISMVESKLLLLGTRGGATHNLYSLDDHKAAIHAAKESGGFKVYHDVMPNSW
>Arab_Me14_ctg01_-_Arab_Me14_ctg01g96t1
MSSTGEWLTPNLRDYEEPTTTAQVAAITRAASTADFKIRVRSGGLLFVCASLVEDGLPIITSRLNKSVVYDSATNVVALSPGYRIQDLATLLRCLERFLSWGHNQDVGAGAFLLAGGPGVRSSRQGAEVSCDDLVDTIAPALYELPTRLTTGNIRPLDCYPGEADQALGLPQKCYVSVTKWWEGPKHDARNVAWMRRIFDRVVPRSFSDPCEATFSRSAHLRRHQKTHRAEKPFVCQFCPVVSSRRDVIVRHTRNFHPDAVPNARRQTRTAAKTDDTHRPSAASSLSSERSVGSVPARQPMHQSQGHTLRQSYSPERSPARSQAELRTTDVHEQLTIALSQSETAVLDQIEGPPQEVSLHIEPEQCELLVQDQAADPDRSQHDGLECHQEQPEKLPSIPYEMLQASLDYAFDFDLLEFPATNYTESALAPLADFPALSPSDMSNHLAPSPGINSQIPLDALYLEAQNCSPPIANSAQTSCPSAADHSEDASYAGALANLGIYDLDHAKTTFSFPSKRVVYRFVDAYFRHMAPHMPLLHQPTFTIASTPSPLLIEIMACGALYLCERTTAVELHAVARRFMCNLERQNDVQESDGKFEVWTLQTYLLMSHFGAYVGTFAMHERATSMFPQTIKLAQDALQELNSCQTLSYMDWVYQETLIRCIVHTIELGAALASTTKEQCFTAPFFDTPFPLPSSNTIWQQTEKEWQGFFQQPDSGHVQDCIFAGQNPASPISDLGLVTLISLILWRTCSFEAFAGSYRLDLSADLVNRTGRAVRVLDTLFEERVKRDEASQTNPLLRIARALLNSVFYHLYASETLTGMKRLLDYPRKRKLSDTSARMIDLEHSSHLSIALCRAAESLQYDCQMGIHYVQRMAPHRFGPVISTACYEGGLLLSWYLKNRSTLFSNPEITAKLDQVIHELSTELTTLRETSNDRLLDLPLMVVAELLSDRSVWQFPSDVSEKLKVLTQFSHGVSFHTMLPA
>Arab_Me14_ctg01_-_Arab_Me14_ctg01g97t1
MSNPVRNVILIGASGNIGVWVLKQLLAHPNHPEVTVLTRENSTAEFPEGVKVFRSDYSPASLEQGFKGQDVALSFLNYDIPFEQIKVIIDAAVKAGVDRFIPSDYGIRTYHKRYEVSISAYKRGIVQYLEAKCGLISWTSIICNPWIEYVCPTSHELNCKSLTSYKCLLDGLLGFDLGKHEATIVDDGNSPISGSTRSYVAQGVAALLSDPAAYHDSKNQYVHIAGHSYTPNKILSILEKLSGEQWKTEYVKAEDMKAEGRKLIAAGNPWGMALFVRAVTCSRSPDGEIVGDLRSLSPWDERLGLKLHDLEDDIKGTLAGQFPMIHQPPVIIP
>Arab_Me14_ctg01_-_Arab_Me14_ctg01g98t1
MSSHSVVQAISPSEENKKGMTDHNECDTSSHEHGYEDAELEPEIHWRTYVALLAMGLINYVAVVSLQAPPAVLSFIGNSLNAPDTQTWIPNAPNLVCGAIGPILSSASDIFQARKNILLIGCMMGVIGCAIVPGSSSISRVIVGQTIKGFGYATTPLLYAIPSEILPNKWRPMAQGIVNMAASCASVSGPLIIGALVEADPVRGWRKYWWIEMALWAASLISIFFGYNPPKRKTQDDSLSWVQKLRKLDILGSLLLTAAVTLILVGLNLGGGQYSWDNSRVIATIVVGGVLVIAFGVYEWKGTNSGILHHDLFLPGKPNGRTFAICTGLFAVEAIIFISFTIFYPILTQALYESDPLKIVARGTPYWVAMVICTPIWAALSSYYRDVRWPMFGGFMIWTAGVVGFATLQPSTDFNAVAFAGLSGIGFASPVVMIMTGVQLSVPHSLIATATSVATSSRALTNSITTSIYTAIYKARLSSAIPARIPKAVIAAGLPVSSLPEFIQALTSNNPSALSAVAGATPSIIAIGAATYKQALADSIRLIFIISAVIGTLGTICVLLIDNMKQRMNGQIDAPVEKLHEKGIKE
>Arab_Me14_ctg01_-_Arab_Me14_ctg01g99t1
MRCDVAITAFLASGATAAAVKKGFVTTKGTAFKLDGKDFYFAGANAYYFPFNDLAADVEKGMAAGKKAGLNVFRTWGFNDRNRTTVAGGLPQYGGEGAGPSPNVLQWWNNGTAEINLAPFDKVITAAEKTGMKLIIALTNNWADYGGMDVYTTNLGGRYHDDFYRDPKIKAAFKKYVKAIVQRFKSSNAIMAWELANEPRCGADGVRNLPRSESCTPATITAWIDEMSTYIKSVDREHLVTWGGEGGFHVASDDWAYNGADGGDFDRELALGNIDFGVFHSYPDWWSKTVPWTVQWIKDHAAAGRRAKKPVVHEEYGWLTDDKRLEYLGKSDNQTRADVLGLWQKTSLKEKMSDMYWQFGYSGFSYGRNHDDGFTIFLEDAEATSLVYEHAKKVNALN
>Arab_Me14_ctg01_-_Arab_Me14_ctg01g100t1
MCRYTRIVWNSCDHSVLSSSPEHTLLCPQATQFKLKQGVHRAPASCFPLGDDLENLTGGDCNGAVVHTNAVFDFCDTCKENLDLDAALPDSTASLVEEVGEYAEDDLQQLAIQRDCLLACEQESLTAMAAFDTLSTHRSSHLKSALGAIRNSYIRTLLLSHGTTKYSTFFIRAFSACAQLLHTLDLYIALRVPTPLFSELFGLVGTKLQQAAKRLRTFTKLTNCLDKYEPATNAYEAAVNKYADKLAVRLGQPAVPDVCAFAHLVRDVPVYVQRALQTRECVGRHVIRELEARADRVCTPKAFSARERNTKGLRVNIEIAENPQPDTKDVPRLRNAGDTLEVMYMPGLETRGRLSPLGVGRGPWWVRGVLEQHGDGEIAREEVTVLSRGQTAQEPHISKLGGQSNLATRKVSVGPFEKLGPMLPEDTAFFGQTLSGSDGEVSGYIADDAGVISNANEDQGKDSALTTKEKKGWKRDGDGRMVKRKCSA
>Arab_Me14_ctg01_-_Arab_Me14_ctg01g101t1
MSSVKSRRFLPRFLRRSSATSTATRSNASGGNDASPRTPSTLRKSLSLSKLAAHSATELRGEALHADAERDPRLARSEVQKPEGRAEHLHSHPHPRSQPSHHTNTNTNTTTNTNTATNTATATTTITTATTTATSSSSPSPARTRTSTTASTDAALPTACPQVTLEAPTPIHPPPVAAAVVADDASALSALASNAAPTACPQVTLEAPTPTHPPPVAAAAPVADDASALSASASTAAPPPASPLRRQSLVAPPPPADHAAAAQPALPALSALSAAMLHRKIWVKRPNASATLVQIGEDDLVDDVRDMILRKYANSLGRSFDSPDVTLGIVPRDAGPGHERTLGPEEHMCRTLDAYFPGGQSVAEALIIDVPVRRTPKPSPRVPLYYAHHDDAQHAQTEYFPPMPAVQPSPAAAAYGPPQPPHSIAVLTNGGQLPPLPSPGAAAARRTHLARPKYGPRQNTASPTTLAGGIPSAATLARPLNRDRHNSSASNDKHSQASNAPIPTPPAPIDPPARTQHDTPPTLRVASPRPEKKRRRKPAPAETPSLPAGLLDGSVPPINVLIVEDNIINLRVLGAFMQRLKVRWERAMNGREAVTKWKAGGFHLVLMDIQLPVMNGLEATKEIRRLERVNSIGVFSSGSSETPHNGLDKQGASHTELAEDDKLGDRSLFKSPVIIVALTASSLQSDRHEALAAGCNDFLTKPVNFVWLERKVKEWGCMQALIDFDGWRKWKDFAKDSDSTNNKDTSKMSTSMATIAPTKKSTNAKSAAPAPAANTPETNGSSSAEKEDKKGKRRSLVQAPPTLPEDESETPTPDADDT
>Arab_Me14_ctg01_-_Arab_Me14_ctg01g102t1
MQLWEVGFKRRGEADVSVLADRGGICLKPPQQRLQPPAGTLLKQKEAEEDEDEDDEEEEEEEEEEEEEEEEEEEEEEEKEQKTVCRLGQQQ
>Arab_Me14_ctg01_-_Arab_Me14_ctg01g103t1
MDPREVAIQSAIADLNSGVFTSQRQAAKAYGVPRSTIQERLSGRQPNAIAHHQQQRLTPEQEQFLVNWILEEDSRAQPPSHPRVREMATLILHMNGDYEPLGHKWVTHFITRNPRVASIVGRKIESARTTAANYETIRAFLELFERTRIELGIQYEDIWNMDETGVGLGVCSNSRVVASLSKKKAYVKSPEDREWVSIIESISAVGKKLQCLVIFKGKHLQSTWFLAQGSKVYLLYLPPHASHVLQPLDLAPFLVLKSRYRSGIRALSALDDAAPIKKERFVTSYNKARDEGLSERVIRAGWKAAGLCPYNPDLVLLSSQVSGRPITPPPSTQALDDVFATPQSSQALYKAQQLILSESHSRSTRLMLGKAGKAIARANTRAARLEFENQRLKYQLDSATITYSRKRVQVNPNERYSNVEAIKAAIDRAAALQAEQASRQGEDEAKKAAAAAAALTLQSMCTEWQL
>Arab_Me14_ctg01_-_Arab_Me14_ctg01g104t1
MPLDDRHASRRPPCLSTTTKSTVCGSPTGAASDPPSFFGHGQARANEDVVRISFTSVKGNLITALGFVHAYVQLHL
>Arab_Me14_ctg01_-_Arab_Me14_ctg01g105t1
MTTMMTMMTMMMTMMMMMKMMIMKMMKRKKTREKEEDGEEEEEEEGEEEEGEEEEGEEEEGEEEEGEEEEGEEEEGEEEEEEEEEDGEA
>Arab_Me14_ctg01_-_Arab_Me14_ctg01g106t1
MATVNRLLHPIEHHREKKSGARQPSIPLHDRNDSAMDKPREAEKHTLAQWEAQRSALTPDEIDKDPEHKPVGHSSKVLRQEDFELIKTLGTGTFARVWLVRLKDAQQGDQDKVFALKILRKTDVIRLKQVEHVRNERNVLAKVAGHPFITTMVASFQSMDALYMVLDYCPGGEVFSYLRRARRFNEPTSQFYAAEIVLILEFLHEREGVAYRDLKPENILIDAEGHLKLVDFGFAKKVENRETYTLCGTPEYLAPEVIRNTGHGTAVDWWAFGILVYEFLVGQPPFWDQNPMKIYEQIVEGKVRFPSAMSAPARDLISGLCTVDVSKRLGNIAGGASRVRQHEWFQDIDWDKMYRREVQGPIVPHLRGPADTRNFDDYEDESGNRDPYTKELSDRWDEYFKDF
>Arab_Me14_ctg01_-_Arab_Me14_ctg01g107t1
MSGEIENLAPSFAPFFGMSGIFFAMTFGCMGAAYGTAKAGVGIAGIGTYRPDLIMKSLIPIVMSGILAVYALVISVLIASDIKPPPEKAYSLFAGFMHMGAGLSVGLSGLAAGYAIGIVGDAGVRSFMRQSRIFVGMVLILIFAEVLGLYGLIVALIMNTRAAG
>Arab_Me14_ctg01_-_Arab_Me14_ctg01g108t1
MGDGRWVMGCRRRADDSLADDDDLVRGAMEPRPSTAARSPPHSGTAAERLVCSPPAANSTSSPSCRLPALARPHTTPCSPPPRSTTRPPGPRGPLAGETAPAPAPAPAPAPARILAPRAPGPAPRAPGPAPRAPGPAPRQHLASTSPAPRQHLASTSPAPRQHLASTSPAPRQHLASTSPAPRQHLASTSPAPRQHLASTTAAAASSSASAASTSSSRPAARLRCKLSTPAPAPAPAPRVSVPLALRPLHATRTPSVFLGEPADAHHAGGPPQHAQPTGGARDAAFANIFGASPAMAGRSQTMTSHSHARIPDRAATMSAQTADMMQRAPPMRQPVNGYGYDRRPPAPYDQRTPSAYDQRTPSAYDPHRPQTHDQPLQGHQRPMLPPNGYHPDPRSSQPGPHTQRQPQPQPQYLPHPLRPDRQPYGQPQRFDPRPSPPGQPPFSKPTPSRFPGPAAPAMNNDPYRSQSLATGPRPNFNPPAHSYQSPANTFRQQPYMNHMARTTAQGRVVPERPDERTMSMTSYRAEGDFGPQQTMMSGRVIPGRRRESDGHDMAPGEQRSLAVSPPLNLGPGTKTRNASQGSIPQMRTMSMASTIAPSIAPSPSDRTDTMSSSVTRPSSTQTTNSNNRASGQSHVAPVVPAPQADKQRRAPLVYPALLSRVATTFKDRVQISEKEKDGLVYQSAFTGADAVDLIAFIIKTTDRNLALLLGRSLDAQKFFHDVTYAHRLRDSTNEIYQFRETIMEEQAEVNGVFTLLTECYSPTCTRDRLCYSIACPRRLEQQARLNLRIQPGLKREESRASLHEDTNDEEQKLWINTVPKDVADSVSDKEKKRQEVISELMYTERDFVKDLEYLRDFWMKPLRNPATSPIPEHRREKFVRTVFSNCQEVYMVNSRLAESLTRRQQKEPVVRNVGDIFLEYVPHFIPFIKYGANQLFGKYEFEHEKRTNAAFAKFVDEVERMKESRKLELNGYLTKPTTRLARYPLLLEGILKATADDNPDKEDLPKVVKMIKDTLSKVNVESGKAENHFNLMQLNKDLKFRPGEYVDLKLTDENRQLVFKGTLKKSPTETTGDITCYLFDHAVLLVRTKTVNKRDEQKVYKKPIPLELLVITQMDDIIPRLGIAKRPSGTTLMGAGAKAIQAAAPRADPNKQQGYPITFKHLGKGGYEMTLYASTPISQQKWMEHIESQQRSLRERSNIFTKTIINEGFFSAAIRVTCAVPLDGGRKLALGTDAGVYIVDRKPKDASMRPKRVLDTKGVTQIDVLEQHQILLILADKTLYSYSTEALDPDEAQAAAKRPKKICHANFFKSGVCMGQQLVASVKTSALSTTIKVFEPKENMANKARKSGFAKMLAQGQDQLKPYKEFYIPTESSSIHFLRSKLCVGCARGFEVVSLETLETQSLLDQADTSLDFVVRKENIKPIHIERMASEFLLCYSDYSFFVNRNGWRARPDWKITWEGNPQSFAIFTPYILAFEPSFIEIRHMESGGLVHIVTAKNIRWLHSSTREILYAYEDELGNDVIASLDFWQAANGPAHKQLLEGALFVSHHGLNPNDHLVRHAPASLSASAQHQDLYTTHC
>Arab_Me14_ctg01_-_Arab_Me14_ctg01g109t1
MPPRIVYGKKATARPVSASYIKFLSPGEDQLFSSTNKEEVQTQTNKGSSQSARTTEERIQDELVALEAQLGGLAIDNDIIKQDGLPVEKKLTSRSRKVLEDRDANTVPKKTSEHIEKPDKAELKGTTQPTELATPPQTPVARPRKKRSKPTTTKKRAQPPTPESTPEHDDVHVRYISPLFSFSDGKRITTFEQWSSELEPHFKITKIAEASFSEVYRLSAISATAGLGEESVLKVVALKTPPEAPLPCQTLERAIRDRKGQMAKELEEREEKDAYKSHVADVLSEVKLLQNLNQIPGFTNFRALTVLQGRPSSSFNNAWKVWNKARPRGKKSYFPDPSKKTSYEDTQLWAVIEMQDAGMDCEKLMESEGLGTIWEVWDVFWGVCMSVAKAEEACQFEHRDLHMGNICVRSSRPESDVAMPTAKDPLRRRFRFTGLETTVIDYTLSRADIVTHQQTPTSSPSTLDAASQPRPHFTGNEVAYLDLNKDPALFEGDAAEEYQYEIYRYMRGAALYDNPLQSEPCPEPKVPTTPRPAPKKNIHIRFGEIPETPQKPSLETATDTNVWRRFHPKTNLVWTHFLLHKLLNHLKGYEPEHQSTTDIMANVDLGDDASIPGAALRVKKKAIKLHRVLQRVSELLCPVALGQAGSLKSVKELVILAVEERWLRVGDVSG
>Arab_Me14_ctg01_-_Arab_Me14_ctg01g110t1
MKGFSALLLLVFAPLSYAQSQNGTDVLAFAVKNLPPCALNCTLTIVKSSTCALTDIECIKGNQKLIDNLTTCVKASCRPKDALTARRFLTKLMDAPVRNKTMQGTLTSLIVGGMAVLAYILRIVARLTWFGGNWGFDDWVMTAAIIITIPLTACAILLNELGMGTDMWLVSFENITKILQIFYYTELLYLASIALTKISVLLFYLRIFPHQGLRRIIYVTIVICAMYIIAFVTATALQCLPIRFAWERWDGEHHGKCVNLNADAWASAAVNIILDLVVIIIPMRELSKLAMSRWRKIGVMLMFLGGGFVTIVSILRLKYMIQFAHTDNVTWDYLPIGYWSAVEAHVGVIVACLPAIRQLQRSICERIWPKQDTARRLYYEENSRDSNKKNGSKYFKSRIWSPKTDQSQLSTLGRSTVDKDDFVHMDDLEKGVRTGGTNEGGSLTWHYSDRSLNHSFKSNEDVQSLTDTAAPVTGSPLGGIMVHSEYSVDRGSLRSYLPRISYKEEALMDTRKWI
>Arab_Me14_ctg01_-_Arab_Me14_ctg01g111t1
MGPMKRHHLLPASVLQPILAVDPTAFPTGMAKKAPFQHIANAANLGCRFCSIVRDGILSFADGEEVETVALAQNMESRSGNDMKKLGHLYPLSVKFQTLNRSTELIFYTNDGFVTKLMPHFTTAAHVSADPSSPECFLKAREWLNCCLQNHGSLQCPSVERATLPTRVICVGDEVNQPYLYESKPGEEGVWAALSYCWGKTKVVTTTMASLPRHKSGIVLEDLPKTCRDAVLAARALSIPYLWIDALCIVQDSSSDWQREAARMCYVYENANVTLAAPQSASSEIGLFLANPNRGTTRVKIDIDGRIGTVYVRKDLSLPMFPMHRHRGDPFNTVTNNTGILETRAWTLQELLLSPRTLWFGSAELGWSCRSSTACECEPEQTSEHMQNDEEFGAHQTLRVSSLPLPKHAKAIDWTKTWHELVQKFTIRDLTVSTDRLPAIAGLACALKTHIQSEYLAGLWRSALDTQLLWVSLWLALNHSNGPPPPFEDDYAPSWTWTSVPGQIRFLERLGHRISTPIWQIADVQFRRLDDNEFGRGKGSIAIESYLLKLHWDNDQLVWASLPDGDGCVEESTFAGKDDVLWDPRSQTQNRSDLMHEPLWFLPGHLSRNQKQCHGLVLEGPSDQSAFVRLGYAEAKFDSSGARCWDVWKRRSTWKAVELM
>Arab_Me14_ctg01_-_Arab_Me14_ctg01g112t1
MPIRSEWSLAREGVTGDTLTRLLQLTAFNPLITLPLFLAGKYTFDGGRVVAGHATAWKHLKTLVALGLLDRLSRWLDNAVTNNWSNDTYVWSQEVVVVTGGSDGIGKIVVHLLAEKGIKVAVLDVQEPTYEAPPSVRFFQCDLTSPSSIGSAASSIRSTLGNPTILINNAGVARGKTILDTTEKDLSLTFKVNTFAHYYLTQQFLPHMVANNHGMVVTVASLAGYVTAPSMVDYAASKSAAIAFHEGLAAELVTHYKAPRVRTVLMCPGYTRTKLFEGFNSKALFPETVAEEIVKAVLGGRSKHMVLPELSWAIAPKLRSFPLWAQYGARKKMDNMMRGWKGRQVVQPSEKEEVGEKKVEDSTVLVEGE
>Arab_Me14_ctg01_-_Arab_Me14_ctg01g113t1
MWSRFTGKTDGGSSAPKKDDDEARRRRSDTARSKRDRGSDMRSVVSSASTRKPSSRRTDSTPSTIASYATAFDDTPRARAPTNDHLYHDPRDERYARRDDDDDDDDDDDDDDDDNDGGRGGRDRRSSYAESSVSLARDGKERKKEKEKEKEKEKEKERGSKDGKKSEKRKSMRSDRSSVSQSQSQSHSRSQSQSQSQAGGYRGEIVNEPRALNRSFSGQIGSEGFSQFPGQAGAPMMSGALPVGHQYPASPHMSSHVQDQFPGQDPVQYASGAMPGHNVFGAAAEFYNDQGQSVNNQPGVRPQPPSVIIGQDTPHLVAASAQANPVADTGTGSAADFYGGSTNPPASAPKPPRPTSMPGAFVDDGIATQNPPRPDGSKPSKTNSFPTTAAGLAGGAALGYAMGHSSSSAQYATSASTSHVHHSTSYNNTNTSTPGGPGGSSSMYYQADLPSTAAVNGSYSNIPAYQEATADVPPPKPPRPGKPDKHSSSSNIGMYTMAGAAGLAAYGLHNHNSHHTSDHAHHAHTHTHTHIQNQTHVMPGAFPGQGYTGAGPSPSPYMSGGMAHQHHHTGPVSKFVDWWKDHEDVQKMEEYTEYIGVCRYCFDPRSSVLDAPRKHHYYDRRRRSDEYDRPSGGIDKKSRYGLKEKTSRTSLHSSSDDKRKKSSSGAGWLAAGLGGMGLATAGKALFTSGRNDFDDTYSIKSGRDTHSRHSRRSRSRESDRNKRYSYGSAGIRHRSRSQDRVSIMSTGITKEQKEHRTVRRHGSRSSSSSRSRDRKSGLGTAIGVGLAGAALGAAARRKHRSHSRSRSPHKVVVQHRRNSSSEDERRRRRSQQLRHKSSRSSASGASFIDISQEHQAQGGFLGGFFAAQPPKEKRAKRASSTHKTKKKGFFNFGNGSSSSSSESDMAFGSGFVRRTKTKRSSQNLKKQTSDERLKATLAGLGATAAAIAVAKANRRDIGKPLPEVVAVRERRNRRRSSDRRRPGASSQYGDDEWEDLPDDGTSSSASDGGLVYGDLDLRKTQSRESLNSNGSGTNKWGWRWGFGKKKRRSSDNLYDNIASTPLARPAAAAAVGAATATVAGSRFSHHDSESSSQHTLQTVYPVASSDPTSFDARRTSSISTPQALITTGPGAVSLQQPQPMHQVPGSIYSTQPTSQQGYTTPTGPPVFSQVPIPPPYPTQAQAQNIIINNHQYPAPPALPRRANSSPVQKSSWKRDAAIAGLAVTAGAAAIAAAKGSDSDRPSSAQSNVRFNLTKEQAAKDVRERRKEQERRDEEEEQRRAQQQKEDDLRREEDERRRREDELRAAEDERRREELRREDELRRAEDLRRDEDERRRRELQRQQEEARKFMEVGRLAKIETDRIEAERRRQHDEMVARETKEAEDRDRREREARAEIQRREALEREEEQRRRERHEADAIEAERREAEIRADMDRRRREQDAADRYNSDRDRQRLDYQPTGSSVSSVATDVRRKEQELQDRERDLVKPDNWKSTAASAVAAGAVAAITSAAISSHKNINKERDQRRENWRHTSSSEKEVEQSYQAYKPGKASEYKPTNVKSYEPSYAQIEPSKIAQDYADEDIFDPTIFKKKETTQDIFRDWEDRYTAKPVSQADFFAPKDLLENDNLPKVRPIDPNEGAPDLHVYESLDDYGASQPKGPPYPPSYSFTATRDGRGPRTPDPVPTLNLIQATPPGSRAPSIRSVSMPSSPNIEPVEDKEDPRPKNAPSRVSWGENQFHHFDVPTPESYKEQFISDRELKEHDKQYSQDKIIVERDSPESGPKTTTHQPYNGAESKTPKPKDAAPSTQYISDKKDEPTWDSIEGAMSRKSSKKEKKQKKAAAAAAVAAGALTAAAIAQNDKDDDPSDWDYKHMDNRSTISNPFSDSKAARSTIAASTVSSIPSMGEAYKSPSPYFDYITESETGLSSTSKARDTMPDMRNVTVVPDELHMPGEFVESPAINKFSEPAKKVMAEEDWIASSSKKRKNGKRKSDDTDKETALPNVLPRVEPEPVRAREPLQEESLRTMSKELQRREKEAKRMSMMSVQSWEMSDDSRPSSPVAEHDIRDIEPLRTVEPSYNAPPRDLPSASEVSSYNWGASDDTQSSTSVSTVVPYPRPTSVEEARAMETSSSGDVPARPKEVSNSRDAPRHGESDIGSSYSKATSAALAGGFAALMGASTKQDQDRIAAEREHARQALEAASNHDPRREEPRPPPNGTRLPDNNDQTITIPSYAFENGEESADVKTPRRKPEKRHSSGKWSPSVGSPLRSEMRYDDYLGREVRYTSPEQHRVEAPRIPTQSSFIPAPEPPTSRNIQDSGYYAPDDQPRKESVERDSDEFFSAGSEEREREKSEKAREQMIDSYNAYQPPKARSDYDETSTYVTAFSRPDDESERTRNDLINAYNAYEPSSRSQHDQDDTSTFVSAFSRPEDDTSTIIASRTKHDGDDDVRSTVSSRSKNEEDPDREERRRRRREAKAAQSGSREQSRDRGYEFDDGSERKRSHRRKHADESGYISDTKSTVSEARSEANSDRRRKHKRRESERDGSTESRVRSRSSAASEPSDPYDAERRSSRRKSKRDDDFDDGASMVSTSSRRDEDRSSRRREEKEKEKRSSGLFGLFSSKSKENLAESSKSSKSKSRDDEDDEERKHRRRKHRSDRGSTYGSDDDDAKSTISTSSRSHREKRSSRSERGGEDRDRRDRDDEKDRSLSRHSAPPAKSDRQGSPYDEQSFLDDRVVAEATPLPDDETDAQAQGDGIIPGNRAEALLPTLEGIHTYLTPSGAIDRPRTPPHLSIEDSRALLTRLTGLQPWQLEAFPDELPPLPISGPNSPTRSPEHARPTSSFGERRLSSSTAVPIRFRKPPVSPAVQQREFGADHEATPIPVTQSSPFRRHVKSPSKEFIASREFRPLYLVERNRKSDEIDEYLPALPSSGSPSRASSAKESETETEGEYESAHESADYESALESPHLSASETSDDPFFDPLSVVSELISPHPGPELKHPELVDREIEEITESGQATPKASDFAASAQTEPLLPAGPSHEALSAALEHAQAEDRGASSPGLASPLAASPFFDEKMMRKVPTDRDDDFSPTKSSSLLQEAALGALAGGVVATALRHRSPSPELKKPELTHTSSSSSKKRKKKDKGKGPATSQFPFSESGEDHSEESVTPYIPQFVENEEDWSKNKPDSIVTDDDTLVGEPSAGPSLAASKQAQTEKVLDATQPHDEPDVDARHSIVGSARSDETEREVLEPAFAEVQKGNEVDVMDYLVKDDGALTPAGEEAPAVVPEQKAEEPEVAQQTVEEAITAPAPVSVPASVSSSVPAPEPARSSWGSGLWGAIGGWGKKKQTPAQTETPEPEVSTPAPVVEEKSTIEPSADIPTVQEKEEAYVPPAAAVAYGTSLAKDVTQERTIAPLALVTDAPVKEEEVDSYKSLPRTYTPQTAFFTDDGRPFGFGMMPVLSEGQNDKVATPGDVETPAKEAAKSLLSATEAESSEPSKEVPATIEQPTIEEALPPVPFDTPVAAADKEVAQSTPGKKKKSKKGKKASTQLPEPVAVEEAPAQQATEPDAVQETPMQYVTPQKTYFGDGGVPAFSFPQPASMPTLDREVELAAVEATSIQQASSEPAAVQDKPQQYVPPQTSYFGDGGVPAFTFPNIISAPAEDRDFTLEDTPLTKEHTGDVFIEPRKVADDSVNKQKAQQTTEVELVPSIREIIADVPGVEPTIDIHDAVVPKDEEVAAVSVIEEVVAPVLSKKKSKKGKKSKYESTQPSTPVDTRPSSPTGEAQRDSIVEDVPASAPVVAESSAQSGLGIADETRQHASPMDAAAVPLPPDTQDDERDLSQTEQAPVELALADTETQNDQLAQPLSEQSTETPTPAAVVAEEDWGYTPKKKGKKGKKSKSGIQTPEVQVESALESVAEPMARTTEPISSSQEPADLSKDVDIPADNMIDPASVPLPDVQDEIEDTAELTIEHPESTPVIEKSTETPRDLATPLEPAEANIETDAWLEGEPLDHASTLLEKENPLELADTALPTDTPAIDDEVAVLSKKDKKKKKKKGKGTETPIEEACAILEEPQTVAKSTAAEQTSEAIPAELVPAQEPVEATEVVQPAPGATSPTANTQAVSYEVEDAATAAPAEVEAPQVVNESQLVEPRPAMEDETVVLSASTSKKDKKKKKGKKGKSADESSTPTLEAESVALPVEADRSELVPEPRSIDIKTSGEPSIGDLALADQALLDPVDVPLPDDTTEKELPPPETAAVEQALPEPANVPLPEEFEDREASYAELASEPQDAQLFESEQTDPAGRELVNTTKDQTVAGAAVAHNESVVKSKKSKKNKSKKGKAVDTEPSTPATEEPPVVIEVDSALSATEPVKKDVLKKEHVAETLNNDASGIEKVPTVGLPIQDVITRDTLEPAFEHTPNTTEPAREEVEVITPVADIPIETASAVEEPLTASIPAHVDPHNVSGRAVDKQSAVHETQAIDRAPAKEEPIIDPFAGLTKTQRKKLEKKLKAEATQKEAEGASLPSTEPVQEDTQEAAPANEAPTENLSMAIEKYPATYIPTQDALVPERQEPVVEETPIVELAPAHKNASTTDEMSVPEDAPALPDMQVVQEAPAADPFAGLTKTQKKKLQQKLKAEAAQKEAEAAALTESRSVEQTSQDPISAAEVPSEAAAVIEEAPVTAELPSLDAQEPIEEPAAEETSEIKQSVQEDLPHHTAQPTPKEEPAVEQTLTAEKVSTVDPHAGLTKTQKKKLQQKMKAEAAQKESKVSASVVEPMEGPSQDPASAADKPSEMASTIEEAHTAESPVVESIPSVEVPASIKAASTLAQTPATEPFTQDNASRDVQPTAGDQTVAETTPVVDEAPAVDTFAGLSKKQRQKLEKKLKAEAAEKEADALLTASESVQGNIEGLATATDVPAGTPAATEEVQALKEATVAKPISTDVAAPAATETLTEAQVEAAEAASSEKAILAVDASAQDESLSQSALPSAEEKTPVDPFAGLNKKQRQKLERKLKAEADQRDAERAASEARAPRSADDATEEQIQTPAPATEEAVAATEQTTTAGVPVQDVVARDNVEEKRTTDLALQSAATPAQESVIESIAEATAEVDPFAGLNKSQRKKLEKKLKAEAAQKEIDEEAARAQEEIKSAEPTTSVDASASIQPAEQEQTVIDDTWPAEDMLTEDASVTVAPTEQATTILEPSMAVDVGVSSSNDALEPAVVTEELSKPADASAIVAEESVVIQEPSGPSKNDKEEKKKKKGIPSQLEPEVAPAELFEPAPTTDIVSEEQPEQGTLQTNELARMDMPEEAAPALEKSLPEPAADTVAEHPSLEEDVPLPDSTISTEPIETPLLEKDTTTTSKKSKKKKKGKKGESISEPQTPVTEISEPVLPSADAKQVSEDALKDSVATDPADAVEAPQESQSAAIVEPVLESTDDTTTGASTAVSNSEPVNEQQEVATDTPTTEEKPEAAEEVATSKKSKKKAKKDKRTSVAESELSAPVDILAEEATTVSLEDDPAPASQVPESTDTQTNETVPTIEITPDAVVAAELESASEPTPIPVVPGEAQPIEQAPAEDTTIPSKKDKKKARKNKRVSITEDALSAPSTPTGEQDKELKSEAASVVATARPEAFKDAIAEPLLTETEQPAPERSTSIETNVKQVDDTLLSRNEEVAKQEAGQDEAAPLSKKDKKKAKKGKRVSIVEDSLPGTPVKEEDRQLLLDEQQVVTPSVPSVPDVGQLSSEAPVQVETTIVSEPEITVLTASEPIATEPPTLEPSAIEPSAADPIQEERAVPLSKAEKKKAKKNKRASTTENSELATPTETPTAELNNFTFDSPSTSDREIDEVPPTEEQAPTVSLAVEETTKDKIAEDAVPVQPTDPVASVVEVTNDADVQEDSATMSKKDKKKAKKAKRASVVDTEQLEPVTPLEASTDITERPDVEGPPTQAADPPASATVGALVEAKQETIARSPALPVEAVPDDRPPPAPVEVPEPVTSVEVQESAMDESALLSKAQKKKAKKAKRSSTVDGETSQPSTPAEEVVKELAPEAAPSTLPATNEPKLAQMLDDEADAWTGAASIKKNKKKNQKQQKQTAIDPFLADEATRAANVSEPQPSPSPPLTSETPLTFSGIPAQYPQTNTDGSVGIADTSAHGLDDTMSVSKDVDVVEEKEFSADGERDVTLLDAAIEQQETEKEQDKMEELTGEAAIAEPSVRVHPTESASVAQPEPLAEPSALVPVDHPQAPTVEEDATDEPASIVVAQIEPTKEKDVDTTTQSTTKKKNKKSKRTSASEEPIIEPEEAVLKPGASVNDDHAQLATDDQIAEQVTASAGAPKDTSKPAAMTDNMNEQLVTEPRTIDLVTIDLPATEHTTDDASRVVVASTELPVPESLLEETTILPTKKDKKKGKKSKRQSGTATPLPEIESSIPIESLDTLTTPQIEGAQAILESHMQPEVPASINAEVKEQLPTAEPAVDVAEDIQESAATAEDQQLAPVPVSKATIEPHVQNLQSVDATPEQVTDEPALSKKGKKKAKKAKKQSGSATPIEESLPVVEPPVEENSIAIQPETIVGGSSKDVETLAPEVVEPEQSAELTTQFEPQQEDVQSTVERDVKPTLMEAGSTAIDNQPEVDVPVETEAVPTSSKKDKKKKKKSEKQSRAATLAEEATSGVATEKVKGIIAPEIAPQAVEPIAEPLVEPVVEPVIQPVVESKDVSMDVAPVSLQESPKAEAEAIKSDVGLRVAEQIQPLDASSAPAFEPTSALVGSSQKEEIQPMPDASIEPIQSAEDDWAHTPSKKEMKKREKAKESGVEMPVTEGPLDIISHSQVQEAGSASAASIEAIEQSEVVRKDIVEDAVPQQSTVREQKLDPLPAPDAPTEAPDVAVQEKISTSVSKKDKKNAKKSKKASGTATPVAEDVPIVQQEHTQEPADTESGNIGVPMDDRAPQTNPSHLTTETEPIPVVASRDIEATPAIPPPTNIIVEQSSQTDRSKQAVQTGIETATADDDLASSTSKRSKKKNKKSVAVAGNPALVEVGATGPVFDPAVPMEGNIIAETDRVILSDAPAPAEIDTTPGAAQTTDNETIDSAVAKGEDVATGNSQDTLVQNAQQEPVSEPISVEASTPLEPSLEPAELERLVLSRELSKKEKKKAGKKSNTAATEETSVVETMASTEGPETKSAAVPSEPSPTDQDIRISPQAGLSEPEPVVEPTVESVVEPAVEPAVEPLAEPIVEPVVEQEVKDLQLPAPDTPISASIDIKAREISAENESSAEQKKSKKSKKDKKAKKQSLAPDAAEEFEDKRPETIEPASLPPSLPVEAPVIESVAVDTPLPEQTPFEREVSATIDVVNSQTVDTTQHETSETVNTPLPGPTSTEEQYVNLPADIPEVIRQSFKAAVPSAEQETLDSASALPQAEYVVEVTQEETSAPLSRKSSKKSNKGRTDKDLAENTTLASQPTLSATEESVESKLILDEIKVDPMIEDAVAQQPPPFVEPSPEVPIPDPELQNTDVGPITEQVETGAHTSGDVAQPMQVNSPPLPEASQLNWESTPAQTAPEVPIGVNAEDEQGSTPSKKAKKEKKKAKKSKGVSEDLTPAENTPPAVPEEAIAVPITIEEPAPNAMATEVVQESHVSSDLRPDAANVVPKGPFTPTEQPKAEITEPVTISSRRGIAIQPEVAETEGMPVPAEDLEGTLARSTSKKDKKKKNKGKKESDRMNETEDKSTVASTSVEEVSRTVLPEQPTMQPEVPPNTIVDESEAQKSASPIPSDIQADAETKESFSSLQAVRDEAVDLRQRSEALELALASNDRLDEPSTSQSTSMFDIVNSLSEKDKKKARKSRNSDLPEPMTPAAEPEAAVETTARVEDVAVKTDELTTVLSRQRSKDEKRKAQQLATKDVAMADVLGTDEPTKVVETKEPRMQDSEPTNLAEPILGADSIAVDVASPSREIVTEELPLPSRKLSKKDKKKQARLAAAAQEESVPETHEDVYVAPYTSPAQNNRPATIEEQERTQVVDPDIATAPLEVALPGPVNVESGPVFSDNSRELSLEDTLVPAPAAEEIDATVALTRKESKKDKKKSKKSISSLDTTVSNEQAIAPSEPVFEVPSTGLDQRIEPIDNTPSMSEVQELRQAERAIRELELDQTNQGNAQTRRNVKLDVVLPSQLLKDKDQDSKEKLSTSAKTEQTLEKTSTTVENTNVGTTQPSTPAKTFDTISEDVLPTLNKKGSKKHRLAALFEKQSPEQLREAERNLRRGGSGSVKNLAEQYESQSRSVTPLQIVTSKSISRAASDDRLRSASPRHDVDFAATVAAGLNESGFDPSYVINNPSFYRSRSTSRQEEYEVAPDDEVATARRRASVSKFGSMGRASASTSPTKETVEPIDRAIPKGIEVPLAATDVPSFDPMDVLNDPAFGRRKSPPGVLEEADPEELYASSKNKTLKGRKKRITDTAKTALSMQDSVEQTAAETPVVEASYIRPPAVEARADSTTCELGFGAPVNEPVRVLNTLEQSPKKDKSVDKITIGKTSQDGEQRGRTMVRNEPSGLPPTPKQESKPAAGIEVGEYPFPRVLTPEVRESTVRVLEEEKKDKKSRKGKERVEAVTETSLQEHHKRRAHPVSFHEEQPEEKRLHKIEAPSSNRATAANVEPLWSFNELNDGAIHATDSAMKAPTPQVKETVHEERQHPQGPRTPRKKSERDAIDRQQAEASPALPEYSTPRRFESPPTSDFVTKERTSYLFDSSPSTRAYGTSPTVAPKTPNFDSPQTNESHGKTPVDRPRQEQVSPIRASKQSESYQSVFGDPTEKEDATTPAPKRARTPGTQSLGTITENSPDDSSLLKKGRSITDVGSAERGVKSLRRTERNRSFSDRVMSPPPITPTPANRRSTPLAQEVSGRETPSRETPWHQANDPIDRSVALSPARRLPHTTPDPIKQQLAEIRDAPGVRSQQSFSNIGKLRSPETERPMSSMSMNSNASTHSLRRVEKAQSGDLRAASRLGEASALDASSVEQPNLSGIALAAGATAAVAAASKLRGEGKGRRASMAETFEAMGEAPRSPMSPTRAPSLRKRQSMQIMDLQTQLDQLAEHNKLLEVERLRAEEVFQAQQHQRQIDEQLVAEAVEARDRQIHQRDIDIAQLKDTLQRLREEIARLTELNNTLTEANRNLTNDANERYAQLQSEGQLVHQQWQTSQRELEGLRSQHDRMTRGMEDALREEIGAALDDRNAEIHRLETELSSAREQIKGLQKQILASKKPSESFLTIRDEDYFDSACQQLCQHVQQWVLRFSKFSDTRACRLSSDIQADTRLDAATREKMDKRLDNAILDGSDVDSLLADRVKRRDVFMSIVMSMIWEYVFTRYLFGMDRDQRQKLKSLEKTLSEVGPPRAVAQWRAITLTLLSKREPFMQQRAQDTEAVVHEIYSTLSTLLSPPSHLQQQIQASLRNVMRLAVELSIEMRTQRAEYIMLPPLQPEYDIHGDLVAKVTFNASLMNERSGETTSNDELEARGAIVKVVLFPLVVKKGDDFGEGEDEIVVCPAQVLIAKPNKKKVVRVMSGAMSMHSRASSKGRSAVSLAPESSVMDLDDSNMI
>Arab_Me14_ctg01_-_Arab_Me14_ctg01g114t1
MVPTSSPRLPEASLTVYTGGTEELIIETLGRVGQVLNFRLVYDKETGRPKGFGFAEFADADAAASAVRNLNDYEIMGRKLRVDWSNDNGSGDNAPSNQSAPPPMNGQAPEVAQAQPSSTLGPLPPGVDLPPNLTCPDAISRTLSTLPAPQLLDILSQMKGLVMTDPAKATELLRQAPQLAYAIFQSLLLLNLVDPSMLGALVETAPAAAAPPVHALPQPQPQPQPQPTPLARPPTSYAMPPGYPPQAAPTPPQPQPYAQPPPQAQAQAMNNDALYAQVMALQPEHIAQLPPDQRNQIMQIRQMLMAGQRP
>Arab_Me14_ctg01_-_Arab_Me14_ctg01g115t1
MSTGVATDTAPQAMKAVSSHPLAPLSASEITAAASIIRASWPAHTDLHFKVVTLQEPPKAQVLRYLEAEHAGESRPHLARKAFLNYYIRNTNKFHEAVVDLTSRRVEHNVLLGPFIHANGDGDEIVAIEKIVLADENVQAEIAKLQLPEGTVVISDPWIYGSDGVNDEDRLYQCFLYLRDPNNAAEADSNHYAMPIPISPVLSTESMKVIRIDIMPTGADNTIKPVEKYKVQPPNEYIPEAQALRTDLKPLNVVQPEGASFKVQQEGTSSVLSWQKWNFRVGFNQREGMVLYDVRYDSRPLFYRLSLSDMNIPYADPRAFDLGDAGAGIMANNLKLGCDCLGSIFYLSSVLSDDKGGVIDMPNVVCIHEQDAGIGWKHTNYRTGRAAVVRSRELVLQSIITVSNYEYILAFIFNQAGEVTYEIRATGILSTQPIDEGVEVPFGTVVHPGVLAVHHQHIFSLRVDPMIDGYDNRLVYDEAFPMPRSDFNPHGTGYYVQETIVEKSGGYDTAYENNRTFKIQNHNVRNPINGKPVAYKIQAPAFQKILSDKDSFNYKRAEFSDHNVYVVKHRDGELYAGGTYTNQSRGGTGVRSWAERKENVMDTDLVLYVQAGINHVPRIEDFPVMPCEILKIHMKPVNFFDKNPALDVPPSEQGFNKSNLLSEQHQQPSVEARVGQDGSCCGPKL
>Arab_Me14_ctg01_-_Arab_Me14_ctg01g116t1
MKSFAAITLLCAALAEVAHGHYIFQYLTANGVKGAQYQNIRRNTNNNSPVTDLASTDLRCNVGGGSGASTTTVSVAAGSSVTFTADQAVYHQGPVSFYLTKVASAAAADGSSDWVKIKEIGPTFSGGQSTWDLKDNYSVTIPTCVAAGEYLLRIEQLAIHNPGSPPQFYISCAQIKVTGGGSKTLTPTTKIPGHVKATDPGFTANIYSGFTSYAVPGPKVATC
>Arab_Me14_ctg01_-_Arab_Me14_ctg01g117t1
MSLLNTNTSIFTLHYSRSVASSLTLFMSAGPPLGQPWCANIGSNPNINRDPPPPPLNVVQGSAPPASGGQAFIERQQSPIYGPPVPIGVAPSFGIAPPFGAGIGLGMLPPMPFMDPFMYGGGGPLAPIRSGNFIPGAQGGIGFGLHAAGGMPFPPPPPGALATGVVPAFAPAAPLWAGGGLAYGNVPTVAGGAMGGMMGGMISPMVGMGGMGIPGYRPAPMAMDGNGGAPPQPEQGDITQIPGGVPPGITHVEAGEHTIFIQIKGNVCPWLSPGAQFLTEVLNISSSTGLNRLIQICNNNAGSDDCENLAITECIELGNGLWEKGQTFKYGDAVARVLTMKDAGWDNKRNRTGGQSLHIWLHRI
>Arab_Me14_ctg01_-_Arab_Me14_ctg01g118t1
MFMLRNLSKFVFGDSSKETIVEISQGQLYLVRPRSVKGYSELIFKDAAATVRRTGQEFQYQLVVQRAYEEGEEDLLAEEGGEDAGLDALAGDKDEKTFLLDEGLQFRTDVRSTGEKIFAWRDLSGDVDDLWEFVCDPSVKPETAALFERVALQCQYERKFRRSHEHATDDDLEALAYYEDSIPDASPVPSPTRKALELPPTHEDLFPNTTKEVMVKKTTSKAAAPQQEEEATAAPLSAAQPKALDLLAEENAELHLFDFPTGTFKLQDANVTATVTEIGDWQYWLHIVGDEREWLGQPIVDDINPVFNYEFKSFIFNHYLEDGSAYSWLLRFKNQENLESIQNGVMQALWEHLNQVKWQKAKDTDREYVLEAFQDMTMEDAPEEEEEEDEEEFEDANDQHSEHYDSDESEDDTETAPKDGDENSQLAVGYKHDRSFVVRGNKIGVFKHTADNQLQFSTTISNIMTPKGKAFNPNKVMLHQQDQGMILQNLDNPNSLYRMDLETGKVVDEWNIHDDIPVKVFAPESKFAQMSGEQTFLGLSGNALYRVDPRLNGNKLVDDQLKQYATKNAFSAAATTEKGHIAVASEKGDIRLFDRLGINAKTLIPALGDPIIGMDVSADGRWVLATTRTYLLLIDALQKGGKNDGKLGFEKSFAKDDKPQPRRLALTPAHVAQFQHETKAPISFTTAHFNTGLDDTETTIITATGPFIITWSMKKVLANRRDPYNIKRYAEEVKADNFKFGSDKNLIVALPNEVDMVARRALQKPTRESIAFPSRVGQLSTPRRGGNRSSYLGRGDIVNSPY
>Arab_Me14_ctg01_-_Arab_Me14_ctg01g119t1
MAVNRIRGAFAPPKKGETFELRAGLVSQYAYERKEAIQKTIMSMTLGKDVSSLFPDVLKNIATGDLDQKKLVYLYLMNYAKSHPDLCILAVNTFVQDSEDPNPLVRALAIRTMGCIRVDKMVDYMEEPLRKTLRDESPYVRKTAALCVAKLFDLSPSMCLENGFLEQLQELVGDPNPMVVANSVTALVEIMEAAPETKAMVITAQTLKKMLLALNECTEWGRVTILTTLADYKAVDIKEAEHICERVVPQFQHVNPSVVLAAVKVVFLHMKNISPELLKSYMKKMAPPLVTLVSSAYEVQYVALRNIDLLLQKQPDILSKEMRVFFCKYNDPNYLKMEKLEIMVRIANDKNVDQLLAELKEYALEVDMDFVRRAVKAIGQVAIKIESASEKCVNTLLDLINTKVNYVVQEAIVVIKDIFRKYPGYEGIIPTLCQCIDELDEPNARASLIWIVGEYAEKIDNAGEILSNFVDAFAEEFTQTQLQILTAVVKLFLKKPDQAQDLVQKVLQAATAENDNPDIRDRAYVYWRLLSSDPQIAKDIVLSDKPPITSTIRSLPPQLLDSLLNELSTLASVYHKPPEAFLGQGRFGAEAMQRAAIEELQEDARENPIAAAAVAAAASGQSAPQSNMENLLDIDFDGSAPASLQKEPSQGQSGLEGLAGTPQRVASPAASGAPQPQSNMDDLLGLFGDGGSGGGAPSAPAQTSNDDVMNGFASMSMQTNQPPPATQQLGGEASKKTNQDLLDLF
>Arab_Me14_ctg01_-_Arab_Me14_ctg01g120t1
MTHTSTAKHDASQAITCIPPLPTEIWLQILEHDDPKHMWLSVRNSSSMYRDCVERLFTSKYLPKLSIALSLPRRDPATGKMRWRGDPIPGSQLKMTYSRLSEDGKHLRLESPAVVKDRSSERTLEELKDAGTLPKERLEEAPAYVSMSSLSFAGLTVDVPVQVDWDEARKIWVWDIEWSKLLSRFYDAKEKQAKRWPSTSREITKHERRTR
>Arab_Me14_ctg01_-_Arab_Me14_ctg01g121t1
MRFSTLFPMLLVAGVAKAQFGGFGGGGFGGGFGGVNPGQQGQQGQQGQQGQQGQQGQQGQQGQQGQQNQQNQAQNGQNNNNNNNNNNNNNGGGGGGGGGGGGGGGNANLALDPNNVQANSAATGLEAGAEAGQAASDTDNANFINVCSGKTLTNGLQVREGSCNGIPMGEIPAANQMVSAVFTSPQNGDVVPPNTAMKFSVQIANLQAGTFTNPDNTYYAAPQTLSGGQVVGHTHITVQDLGNDPNPTQPLDAETFAFFKGINDKGNGNGLLSADLADGLPEGFYRVCSMTSSSNHQPVLMPVAQRGAQDDCVRTIKVNRANKVNKDSSKVNKGSSKVNKGSSKVNKDSSKGSKVQVVVDVDVSGGPDLLPVGLSPRETYSHGMARVVVRGNTSTASVLRKDSKLLYRGQTT
>Arab_Me14_ctg01_-_Arab_Me14_ctg01g122t1
MTPNMASPLRLDFVTVDVFTGKQYEGNPLAIVRIPQSASVTQEQKQRIAREFNLSETTFLHENKPDAKDDKWRVDIFMTSKELPFAGHPTVGTACYVLSRIAEERGITKGVIEANFTLKAGPVGLRYDIARKRAKAAIPHDVHVHTKRWSKDDLFKLQPGLAAAYEQSQIKTQDDCPIVSIVKGMTFILVELESVEILAKVSLAGQSIEIDGLDQGWDDTFIGTYFYVRTGKSDGGATQLRTRMIEGPLEDPATGSAASDLVAYLSLNEGKAGETLKYELVQGVEMGRRSEIFIDVVMAKNGEIETVYLEGGAIQVMEGRLTV
>Arab_Me14_ctg01_-_Arab_Me14_ctg01g123t1
MSSTHSRSGSDDTNATSISYILEHVLQYPGSYEIPLRTMYTLNCVPRAQPLPKDLARGHTPSNSNGGASPTSPQFAWNSTESATMSFTSELMTHLNKLPLQPSSLPPTFIVNFVSRCFHPDLNLVDFPQALTALDYLRDLENRRRKEMVAAFERLHIHPDTYENDMESMAETFPGIALWVRNVEAKNRKAESYYAQIWIGVRRWIMINELSIQPFNKLNCMGMLNTLLPPLHDSSKLPSPVLNCEVLKEERDSFFDYIRLVQKNGPDVLKPIMNHAKDPGDETSWSAIQRTVDKYLRVTKNMIDDCLATTGPESFKAYAEERKGKKTDSGVSFGAERRPSVGSTSHEQHEEEPMPSYASAPKSASKLERITREFKRMRVKPRPSVEEIVQVNSRTDTDYVPQAAEAKGKKLKKARSFASLKFGNGSSLSLTSRKGSDASEAFDPEQMKKARAMYDATVNRH
>Arab_Me14_ctg01_-_Arab_Me14_ctg01g124t1
MSTSRAANPLQQMHDDDDRLAPPSSAQSNIASKRAAKLHPLALSTAAAPVRRTFFAPWNSSSTGHQRAENRLSGSTSWRASRSLKLGEQYKGGLAGGKRIADAVGAGSEDFGKDGRKANGCWEKGAQGLRTDGQQSLADIWSSSKAGKKSVSEKKILLAESRLDLDQDTLDATLEPQETPIFEGLCFYVNGSTAPLVSDHRLKHLLAAHGARHSIALGRRTVTHVILGTANANGGAGGGLAATKIQKEIARTGGKAVKYVTVNWVLESIKTGRRLPESRFAPLKLAHQNQGSVLGMMNRSNATRITHG
>Arab_Me14_ctg01_-_Arab_Me14_ctg01g125t1
MGIKHLFQLIQEHSPGAVKTGEIKNQFGRKVAIDASMSIYSFLIAVRSDGQQLMSDTGETTSHLMGLFYRTLRMVDNGIKPLYVFDGAPPKLKSGELAKRFQRKTEAQAGMEEAKETGTAEDVEKFSRRTVRVTREHNQECQQLLKLMGIPFIIAPTEAEAQCAVLARGGKVYAAASEDMDTLTFDSPILLRHLTFSEQRKEPILEIHLDKVLEGLNMERKQFIDLCILLGCDYLDPIKGIGPSTALKMIRDHKDLEGVVEHIKNNTKLTIPEDWPFADARTLFLEPDVRPADAPECDFKWEAPDVEGLVKFLVEEKHFNEDRVRNGAAKLSKNMKTAQQSRLEGFFKPVEKTAEEKASLKRKADEKLEAKKKKQKEDAKAKKQAKAKPRTAA
>Arab_Me14_ctg01_-_Arab_Me14_ctg01g126t1
MTTPVSFDWKDPLNANSLLTEEEQAISETAESYCQERMLPRVLDAYRNEDFDRKIIEEMGGLGLLGASIQGYECAGVSSVAAGLITRAVERVDSGYRSGYSVQSSLAMGGIEEFGSEELKERLLPQMAKGKLLGCFGLTEPNHGSDPGSMESVAKPHPFKEGYYSLSGSKTWITNSPIADVFVVWAKLQETGKIRGFAIERKDCPPGTLETPAIKNKNGLRASITGMIQMDEVPVPKENMFPDVEGLRGPFSCLNSARYGIAWGTMGALEDAIARTREYALDRKQFKGNPIAKYQLVQKKLADATTDAAYGILAAYQVGRLKDEGKAAPEMISMIKRQNCDRALINARTLQEVFGGNAVSDEYGIGRHVANLFVTQTYEGQSDIHSLILGRAITGIQAFC
>Arab_Me14_ctg01_-_Arab_Me14_ctg01g127t1
MALKRINKELTDLGRDPPSSCSAGPIGDDLFHWQATIMGPSDSPYSGGVFFLAIHFPTDYPFKPPKVNFTTRIYHPNINSNGSICLDILRDQWSPALTISKVLLSICSMLTDPNPDDPLVPEIAHVYKTDRSRYESTAREWTRKYAI
>Arab_Me14_ctg01_-_Arab_Me14_ctg01g128t1
MHAIRPRPTCRAHNNFSPSIALWQHFIAPNERLQPWQLKSPFATEAPRSHDDGVLVPDRGVGASELKDASGSILIKRFKTDRGNWRSRDLSPKPGELGEQKQGVSRRGHIPGTRQDAEKLLIYAKEAYEKASDYQGVTVQPIRPHGLFKESHLPWASSNKGAKSGEDRLELEIQAFHEYVRPNRAESIARKHVIEQVRRHVQKILPEYVLEVFGSERTGVAFAGSDIDLRLVPKHIMADTAQAKLPPTPEDRAKRRRDLKRLHRALLHKHKHDYMLPTVRWARYPLITLQDRASGLDVQLVLSNDTSVSRELMQRYMTEYSYLPQLYSVVKAILDIRGLSDVFRGGIGSYSLFMMVVASLKHKPYPGNRVGGALTFFLRFWSSFKTKGLGVSIEPPEFFDKSQQVVMHAKATSHIEEGHTPPLPAWMLTLRDPADETNDLGRKTIAWKHIQTTFGNLAVKLREDVKVNTRPSLLAPHVGPMYMLHQARRKRLTKYGEYVATEGGKHAEMGEMTRSFRKVSTAIERQGAPVAPRAAATINEAAGPATRKNLAATSQAVGENEASSERSAHEPEAVSWQKQQNMVDKTERPGGSLPIFWTWARDEEQAARREDQSGSLEPSKSHNYSISNPSGF
>Arab_Me14_ctg01_-_Arab_Me14_ctg01g129t1
MAPTPRPTNDGAESFEPQESEHPALHPSITNVPVTPGFGLNEEKELARQTNNNNNNNNLPFDPETATPGPVWGDKGSYFPKHQEKDRASSTEQAEGARTGEELLRRLSVVSDSSKKNDLVDIDPRAAHPGLNLSGRLISATFAVPYNLGYSKGNDWEMNPRHGTSALFDSFSYLASSSSPWNHTLVGWTGEISNAKAAVETPIQPTVNKAAAPIPVDSKKPAQTPQQPSGIRVGREDRERLEKQLERDHGGKIVPVWLVDEVDDGKDEYVMKDQSRWRTYAEHELYTILHYKQNEPADGRAARKSWADYYRMNKLFADRILEIYSPGDIIMVHDYQLMLLPSLLRQRLPNIYIGFFLHVPFPSSEFYRCLSRRKEILEGVLGANMIGFQSFSYSRHFSSCCTRILGFDSSSAGVDAYGAHVAVDVFPIGINSISTKRQAFEAPEVEERIKLIREMYADKKLIVGRDRLDAVRGVVQKLQAFEMFLEKYPEWREKVVLIQVTSPSAVVSDGGDNTQEKMVNKISDLAAKINGSYGSLSFTPVRHFPQYLSSDEYFALLRIADVGLITSVRDGMNTTSMEYVVCQKENHGPLILSEFSGTAGSLSGAIHINPWDLGGVADAINDALNMSTQERDEQHQQLYSHVVGNNVQSWTNNYLKRLLTNLSSFDQSFATPALDRAKLLLQYRQAKKRLFMFDYDGTLTPIVKDPAAAIPSDRVIRTLKTLAADAANAVWIISGRDQAFLDEWMGHIPELGLSAEHGSFMRNPLSDQWENLTEKEDMSWQQEVIDVFQHYTDKTQGSFIEQKKIALTWHYRKADPEFGAFQARECQKHLERTVAKKYDVEVMTGKANLEVRPRFVNKGEIAKRLVLEYGEAAPEFVLCLGDDFTDEDMFRSLRQSKLPIDHVFSVTVGASSKQTLASWHLVEPSDVISVISLLNGSADAGNVGAVAVVEGYVPETRV
>Arab_Me14_ctg01_-_Arab_Me14_ctg01g130t1
MGGVLVMAAVGGGGGGGGGRAVEQGGGVLVMAAVGGGGGGGGGGRAVKQGAGCHGDANHVSYLLDEGWGGRSVGRRLAEQGAPSDNSERDGWDGGAAASRARGVRALEARGEAAERLAERLAWAFAASRMSQAV
>Arab_Me14_ctg01_-_Arab_Me14_ctg01g131t1
MGLFEKMQARLELYRLEQRYTRRDKRSTFISEAQYVDGEYVYASSPSPSSSTKSAGTTSSRRFSKMPTLPAVRIRELARAGTSRS
>Arab_Me14_ctg01_-_Arab_Me14_ctg01g132t1
MSFNTESESAKSASHSIHGVSTEPAVSQDAKATPQTGNQNQNIMATIENDDDRLLVKIGYTPVLQRHFSRWSTVSYAISILGVLGSVPATFGVPMSSGGPATFAELVSAYPTAGGMYYVTKHVVPPEHVAAWAWIIGWCNFLGQAAGVASLAYTISQMILATAVMHTFDGGEATFTPNAHQTVLLAIFVLCLFGAICSFPTNWLHRIILWFAPINIIASICICIALLILTPNKQSASWVFTTVTDGSGWGSKGFSFLLGFLSVAWTMTDYDGTTHMSEETHDAAIRGPVAIRAAILVSGITGWMLTVTFCFCMSDYEGIMSTPTGLPVAQIFFNAGGKTGGTIMWFFVMLVQFFTGCSAMLANARMAWAFSRDAAFPFSGYVMTILFWSKVNSRTHTPVNAVWLVVAFCSCLDLIGIGSTLTITAIFNITAPALDMSYIAVIIAHRWYEDRVVFHPGPYTMGRWSKPVNGVAVTWVLFISAVLFFPTVHPVTFSNMNYAICVAAFIGLFSALWWYAGARKSYTGPRTSDTISGLPPEDPEDILSDYDDRYTP
>Arab_Me14_ctg01_-_Arab_Me14_ctg01g133t1
MLILESSETHERCLALAIFMSGIPIGPAPNPTFTVTLYRLRRIVRIIGAFFVGVFLIFLCNITLYKITLEENIQSCSDLLRLEFSQNTEWKRLISCEHHPKSMANGEISLAGAALAVALTALAIAVGQLLQQVFSTAEGYRRCQHSVLGPWARKTRLTWRRSQFRFEVKFTTPDIILQTNVPMPVSRKMLPRLPVKREVVAVDHSGANATSIPVEGREETSTDQVGVGSTETSHSGSIAHPSKILSDPSLAMIRGSLESIGVSEEIIESITSKDGNFELMCDLRSMFCPFLPLRGSSVTTMSNVLCTDVETFATHWARILLRRHLEQYILQEFQSTHLKSLLGHLVTYAARWPHFFYESLHFQMSQQSRCPADLIEFAHDVFDETTAYFVDVRKRCGIEYKDLVLAHLHLGAAAWTKSKPPPY
>Arab_Me14_ctg01_-_Arab_Me14_ctg01g134t1
MAYKTTKYSRQTSCYISAALFWGPENSSSGSCATIWPNLRVLDVSTGLERSTGDYWLRSAAEYPYRERYDFPEPEDSDSDHPDSEMWRLAGRWPSRQFRTRPEPKFFDELAISIAHAAANMPKLEYLDLEFNASHQSLLDPSITSFHQGMRRTGGPPIRGLGILLSCV
>Arab_Me14_ctg01_-_Arab_Me14_ctg01g135t1
MDDKAQQSQSQSQSQAQSQSQSQSQAHAPSSLMPDMQDTPPRADVDEILRRKRKAREYKACYPCRQRKVKCDQTVPCKTCVVREHPELCTYHPPSESHPPAKRISMGLGQNGHDFNVNGLVHIHGGTVTLPREDWEHICAKLQTAEKSLNELKNSISSVSEVAPPLNGFSPSTSTALAAAAPIDGEQSHVRTQGIHTRNDITGQTIHIGPSSVPALVMALGRGEDAQWAPGLQDLLGKKSMLPIFGLDNESATYPFVDLWGLPHGSISRATELANALPSDSECLSFFRCYRETAHAVYPAVADIEGVESDLLLFLINRASSQGASGVTDQQIYGKDFHWIGLVFAVLASGCQCSTLSRRERELTSQVYICCSFECLRFTNFLSHANIENIQTLLILGNVISNNMNAGVAWSLMGLTVRLSQTLGLHRMCPSSTPVQQRIVRSKVWWALLWQDSLLSVSYDRASSTTTIDHTVPLSNHTAPGTRTYVESMYRLCKVGLDIVRERQKPQTSQDALIRITEHRNELQEIMVDAADYLKDSRRCRSMRDQLEHWALYLHISYITSELCRPAISPTTAGLDLSKTLRKTCIDSLTNTVEAFLGLQNMTPFATRSWAALHRSLSCALLLGILGEHNRNERARGLLQNIIQVLGDFTKDVDPNELATPITRSVSALERLLRITTSVNRKTSESGSLASPPMNTFTADDINAALTNGDGNAFSQSPLLGLDLDSSPYALMESIVWGAQKDG
>Arab_Me14_ctg01_-_Arab_Me14_ctg01g136t1
MAEEGLVQPKTRDFSSSSNPARTSSDTSASEHTHVDHEKHRPVVRETTHDGADVVNLPIRTLSNDANLEEYTQETLDGQIARIHTNKTGKIERYELVTWKVDDPENPKNWSKAYKWWCTMCVAITCFVVAFNSAVITADLEGVSETFHVSEEVSLLTITLFVVGFGVGPMAFAPFSEIWGRRPIYGVTLFFAVVFTIPGAVAQNIGTLLVTRFIAGVAFSAPMSLVGGTLADLWKNEERGVPMAAFSAAPFIGPGIGPLCGGFLGDAAGWRWLYWIQLILSAIVWILITFTVPETYTPTLLARRAKKMRKETGEDKYVTEQDIDTRPFSQRLTLFLIRPFQLLFRELIVFFISLYMSVLYGLLYMFFVAFPIVYQKGKGYSASSTGLMFIPLIVGVLLSAACAPLVNRHYMRLVKQHNGHPPAEARLYPMMLSCWFIPIGLFIFAWTSYADLHWAGPALGGFPVGFGFIFLYNSANNYLVDSYQHQAASALAAKTFIRSFWGASVVLFTNQMYDRLGDQWASTLLAFIGLACCAIPFVFFFHGAKIRAHSHYAYSEDEENKGEKQAA
>Arab_Me14_ctg01_-_Arab_Me14_ctg01g137t1
MSYETDNYEQRDRSPRRRSRSPRRSRRSYSPRSRSRSRDDYRRSERRSRSPTGGAQGSGNYQSYGASRGGAPRSTENKDNMMQSIRDSSQQDRRVYVGNLSYDVKWHHLKDFMRQAGEVLFADVLLLPNGMSKGCGIVEYATREQAQNAVATLSNQNLMGRLVYVREDREAEPRFTNPSTSRGGFEGGIGGRGGFQGGFGGPPGGAPGGGGRQVYVANLPYNVGWQDLKDLFRQAAHTGSVLRADVHIAPDGRPKGSGIVAFETVDDARNAITQFNGYEWQGRNLEVREDRFAGNAGGFGGRGGFGGRGGFAGGFGARGGFGARGGFGGPGFGGRGGFGGGFGGGPGGSPAGPGFDPNGPSNPPNPFTDFAASGGEPSNLIYVRNLPWSTSNEDLVELFTTIGKVSRAEIQYEPNGRSRGTGVVEFEQSADAETAIAKFTGYQYGGRPLGLSYVKYTNQNNGDVMEGTEHTGGLTQDQIM
>Arab_Me14_ctg01_-_Arab_Me14_ctg01g138t1
MSADFCAGYVSGAVGIIIGNPLDLVKTRLQAGSKSAADASTSTSTAAVAVPRGFGWHFENAGTVGATAPILGYGALNALLFMTYNRTLTLLSESPAAPDSFAKVFLAGATGGLASFVVSAPTELIKCRAQVSTEKHATSWSIAKQIWMRDGIRGLYYGGGITSIRDAVGYGFYFWSYEWSKQAWTSPDDTGRETAMKVLMCGGFAGIVTWATIFPLDVVKTRVQTQLLQPAPGQRGEQQTLLHAEGRGPRMGAMQIARRAYQTEGAGVFFRGLGICSVRAFIVNAVQWAVYEWMMRLLQHP
>Arab_Me14_ctg01_-_Arab_Me14_ctg01g139t1
MPSQPTAQGWDFGSVFDLIDSGDVHDVGSPKLETRTPLVRPSLAAPDGGIRLGSFVKLFEDLGIAEDAPLPPLSPLDPDSGISNAGDVLLPSPQFELDVSLSEPTTSTDDSQTVLTKKQRKRARQQAEKEQEQKQQESRQQEQKHQAKGPFKEAQRKQLQKRLESVFEARPVIATAAPTPTPSLPLKITQIEQTPSKKSRSRSPSKQLQSESPTKPASSNSSIKPSRPTSPVKQLRAQSRSNVGAKIRPATPVPVMEVQQPIASPQKKAPETPAPVKSQRSAPKERLSSTTQPATPQVQPTQSHHAHIAPSATPTPFEYGSGHGLVPRTVRPVTLPRSSQSTVIAQPTTPTRVPVPTPARNFTTPYNAPEAITVRPSVERHLHFHAKLLNTFPEDAKYIVAPRQLVNEKTMAEGIHVFVDASNIMIGFKDILRKYGVRQHDMAFDSLALLLERRRPVAKRVFAGSHREANPLPQIKKLVDTSKAVGYESILQEQVFISREDSEKKKFFDDVKRLGWHKANQLRSGSGSDSETGPPAPKTPSAPRWVEQGVDEILHLKMCQSILDTDVPSTMVLATGDGAEAEMSDGFLAHVERALKRGWRVELISWRQQTNGGYRNKKFRTKWAEQFKIIELDDFVEDLIDTA
>Arab_Me14_ctg01_-_Arab_Me14_ctg01g140t1
MLSPTKVAGLSAYIPHRVRRKWRATKSRIHSRQSVTSSIASLETSWSPSDTIKALRTHPWSIYDAQYLFLAIVAIFSLSVSEAPGPFAKTFAATALLTGILVPATRQFLLPLLPTLTWLFLFNSCKYVSPEYRPAIWVRVLPALENILYGANLSNIISAHQHTVLDVLAWFPYGLVHYVSPVIVCGCMFIWGPPGTLPTFARAFGYMNITAVLIQLVFPCSPPWYENTYGLAPANYSIHGDAAGLKAMDRILGFDMYTSAFQASPVVFGAFPSLHSGWATLETLFMGHVFPKLFPVYVFYTMWLWWSTMYLQHHYAVDLVAGSLLAGVCYFFGRANFLPRIQPDKEFRWDYDYVEIGDPQDGAGYSMLDIYEEFQPQSDSDDWASGSSSSYSTGGRSPVGARSPTDDSQSLWDGDTVASDTEPSKH
>Arab_Me14_ctg01_-_Arab_Me14_ctg01g141t1
MRLAVRWFPLLLCCWVGRAGAAVDCAPSSGTFAINSPDDVATLNQCTAFTGNVTVAAKQIEDITLNGLKAVTGTLQITDVEGVLSISSTTLESVSTLILKDLPKLMTLTLPALSNFSKLDFTGLTALKGCEIATGAVQRDVHEVNIVNTALETMDWLKWPVASTLTIAANTKLTDFKLPYDRIAAGSSYQISINSALTNLDFSQLTGIYGSLMINGNKDSQLGFDKLETIDGYVRLSGPFTNITMPALTDINGALRAESSKNILSFCNWLSVQNRLFGHYDCTANGTNPPTASKTTVTTSRPTSAVTTTSASDGDNTSYNDESSLSTGVIIGIAVAMVVLISITLTASALFFRRRSRHKAQATAISEKGKTRSSSTLGEETNAPGVRYELGGRKSARELPGAGPVRELDGESLQEVDEGRLYFRDQKPASASPMGRFELP
>Arab_Me14_ctg01_-_Arab_Me14_ctg01g142t1
MEIINVFLALMSFLAVALAGQDRACKEGSLKCDGGSPGGAVFVCNDGVWIVLMACRSYENCVKKPVPHCTWASADAGSADSDPVPGFEGLPAEVSAAADDLKNATVADTVESSTAANNGSPNWNVCTPCMRHNDNCRQSCTFQGDECDIACGWKTSSVNLTTGDLRQPTVSCGDFCKWPYQ
>Arab_Me14_ctg01_-_Arab_Me14_ctg01g143t1
MKTFTTILAFTGLSILAAAAPPGTQGSCGNCDTLPGPQTGGNAQIPLRSSANKSDGKAYKCTTFGNEVRISSCTNQMCGLCMIFEDNDCQGDILHWGGPGSAFEGKGARSYFCI
>Arab_Me14_ctg01_-_Arab_Me14_ctg01g144t1
MKYLTTIFALMSLTTLAMAAPAEPAHNSQLIARETQPWAPGSYCGKCVLQEGGQLRELRTSVPVNKCNTLAEDEHYSSCTNQYCGVCVVFKNNDCQGDVVHSGGPGAGSFDAKSARSYYCM
>Arab_Me14_ctg01_-_Arab_Me14_ctg01g145t1
MKFLGVTLASLGLASAASVSNKQKVSYDDWKVFRVNGPSNTAKFQEVVNKLQLDVWKGKPSSGDVVDVSVAPEQLSAFEAATKDFETKIMHENLGASISEENTFSTYAAGAAPSATWFNSYHALADHYQWISDLAAAYPSNSEVISAGKSLEGRDIKGIHIWGSGGKGSQKAVVWHSTVHAREWITTMVNEYAAYQLLTSTDATTAAFKNKYDFYIFPVVNPDGFYFSQNSNRLWRKNRQTTPTASCVGRDINRNWPHKSWSQAQGASSSPCDEDYKGPAAGDGVETKALKAQLDSLAAGKGIQLYMDIHSYSQLWMYPYGYTCSGTLPNSASYASLTKGAIAAVKAVHGTTFTGGPICNTIYQVSGDSVDYAIENAKAKYAMTVELRDTGTYGFVLPATQILPSSEEMWAGLSYLLKNMT
>Arab_Me14_ctg01_-_Arab_Me14_ctg01g146t1
MGEIEEVKDGRVVRETSSSSPSDLSPQPTIDEGEAQKKKTLWQKFITPGSVLQIIAAALFAIAIGLIVTTQVSDIPDAAVALLAIPGQLWLRALRAVVLPMIVTAMIMAVQRLRTMTQGGGKAGKLARWTIGYYLLTTILAVAHSCLLVGLVWSKLMTVVGGEQLQVDEADQETIDEREAFAIHEVVVDMFYSLVPNNVVNAMATDSLLAVLVTAVVLGYCIKPGSALIRAIEEIEQIIMEIITVLICLAPIGVFFLIMPNLFRLDIAEIGINLGILIGGTLCGMILHLFVLIPIIFFAMTRKNPYTLWIRCSPAWITAWGTASSAATLPVTIRCVLAQGVPVTVTKFAVPLGCLINMDGTAIYFPIVVVFLAAMQGITLNAADYIVVVLLSTLASIGTTPIPSSSLVLVVMICGSINVPVTGMYAVVVAIDWFLDRFRTMANVSCDTFAAVIVTKITGIVDDPENELADAHAGTSHGVAEMDPNTLRETHGNGKV
>Arab_Me14_ctg01_-_Arab_Me14_ctg01g147t1
MFAKSIVTVLTLAVAATATLDPATSNTKGKYPSSPSCSVTKTSKAIQAAECSHNTRVSGKQTFAVFTQDHQYDGNHGYPYGTCEAYTCAPGTAMKSSKDKWTFFWSNAGESSGDGAGCIKSPKDGTCGCENSDGTFVYGASNCK
>Arab_Me14_ctg01_-_Arab_Me14_ctg01g148t1
MELPALAPSPQPSVRDTLKTSSGLEDDPARAKRAHQACLNCRKRKSRCLLEEQGTIPCLRCKRDGLDCVLGGSNRGGRRVRRKRVDETRPGLPSLTAAAPDDGSFHALGNLGTWSHDAHDTGAQQQQQQQQQHSQQQQHSQQQQQQNQHQHQHQHQHQNQHQHQHQHQQYGDNVQATSSNSSNTDELPFNNLQNPSDALGILARVAGESSSHDEHSHAHHPGAEAGVGRAAAAPGELSSMNAPPPPLSFSYPLLDRGILTVHALCQLLLRYQANYHPFYPLAPAHAFDTTRLSDTVRKEPHLLTALLLIASKDLVNEPHIYEACTEHMKGLVANLAAGGDAGIEAVEALLLLAEWAPYTQRGSAKVGKGEEDKESWMHVGIALRIAYFLALDKYSFRFVDQAKDPHHNRKRLIWTAAYVSDRHISIRIGKAFWSRGPGPLTTLRREDYPSLIPKNPNEEDYASIFQANLELTQLFSNAPQRVFVNNVGAVGDARFIYEGLDAAKAILTTVNNFVSPETSLRFMPLRYFLYLVHAGVFLYRARCTGVISGDEDRAIRAMINETISRLQRSAVGVETGIQHPGSRYSQLLKLLWAKVPRKDKSSRSAFRHPGTSVASNPLDANGFPLLPASATTAQSPRTSSVGTGESPALTEQMGDFGWTDLGAVSDFAIHGNAANGAPQDDSALWNGFLPLDMGWSANGFSLDGVGWDGTANDLGMLF
>Arab_Me14_ctg01_-_Arab_Me14_ctg01g149t1
MRALTRAFSSLSHSFPHPFITPSTTTAAASPRFSSRTKPLPHAHHYLQPSPRAYPGRGLHDAGTARRYYSRIDARPFGPFAGLDASTRPAPNMEELSKTLKGIGLESVPQEPNTYPDLNPFDIYRSHITELLAEVSGVDRKIIYPTLAWTAKPENGDLQLAVPALRLKGKDLKAYAQELADKFPESPLVKKPVVTGTFVGFFFKPESLTSIVLPLIFKAGQSYGFNKSFGLKEDGSKKKMVIDFSSPNIAKPFHAGHLRSTIIGGFLSNLYEGMGWDVVRLNYLGDWGKQYGVLAIGFDYFGSEEELVKNPIGHLYDIYVRVSNIQKEEADKVKLLKTEVTKDKEEGKDTSAKEAEITKIETEGIDEQARKYFKGMVDGEPKAIGIWKRFRDLSIEKYKQTYARLNIHYDVYSGESQIKDESMDLGVKIMWEKKVCEDSEGAVIVDLTKHSKKLGKAVIQKKDGTSLYLTRDVGAAYERMQTYHPDKLMYVVASQQDLHLAQLFKIEELMGWKDISSISQHINFGMVLGMSTRKGTAKFLDDILRDVGDKMHEVMRGNQAKYEQVEDPEKTSDTLGISAVMVQDMKGKRINNYHFDMDRMTSFEGDTGPYLQYAHARLCSIYRKAVTVDASLEKLDFATVDLSELQEPHAVDLVRQLASWPDTFLNTFKTQEPTTVLTYLFKMSHAVSASYDHLQVVGGDKKINVPRLALYVAARQVLNNGMRVLGLSPVERM
>Arab_Me14_ctg01_-_Arab_Me14_ctg01g150t1
MKWTHKVKTAKEWRKPHALYRIPWNYKSLALGIGGRSGKRDTVTMLWDPPDMWELLRSVIVQPPLQDDRAPVLRAAEAKAASFREKASNCGSAPPALDRNGDNQGGGPPSDSPRMLVWTEACGGSVRIRRMMLRPIAEGGTPWKQLQPMPGQARALLMPAI
>Arab_Me14_ctg01_-_Arab_Me14_ctg01g151t1
MADVARLQAVGGAARSSSRHQNGHTPTPRRSRSGHYSNDIQYAMDFIVQPPRSARVGHTIPGSIIVRLRTTNTYPDDAVVDSPNLMAVAALVPGPSSTASSDPNVLNTLLAGHRIDSIHPFADDEADGSIASMDMAGSQGVGYMRFPDLAVRQAGTYRIRITLLRFGSAVQVVDSSPVVVQNAGPATAYASYNGRYPVASY
>Arab_Me14_ctg01_-_Arab_Me14_ctg01g152t1
MRYSIILGAAALVAASPAPQAFDPNGLDAVATLTQGPPVGVGPAQETAYQPGAAQSQAAAAATATAIAQSAKRSINEKSLKARTFWWSWHSLKQISPAPAPVPSVTSTTSTSTVVPTTTSAPVVAAQTTKAPSTTDGVVPSSCTPVSWTNTYAFTSDSACPTAIEVGTYCGFINPDDPCAPQPAGKGVPPTDDTVNGFLNNDAYKQLAVGAQTPSGYMQSFVNLQGATTGNGYLSYKTLDSYDVATCSKFCDDSDTCTGFNIYIERDPKWNPHQCSCDNPPSTINYKCSIWGQKLTKDTATNTGSGRDSFQVVITGSNGYNKATYTPPTPPSCSRPQNCGKKLLNQAPYCMGQKTFPGPFDPSLCAAYAQAQNAINRKFGIIGAFLSLFGMNKGACIQFQAAYLEKAGLGFGTHCRLFTKKFTPDQATLDISVGGTSQWGCQQAFTWDVDVNASFTWGGWSRKN
>Arab_Me14_ctg01_-_Arab_Me14_ctg01g153t1
MSAPPKCIVAYSRRIAVHTRGSHGGLKPCAPFFGLRAAPVLQHAFHSRRVEQLDTGVRSLTRLRPLSLQQRITKVQSTAITRYASHAAAEPHDEETPTSPPFSAGPYSNLTIGVPKESYPGERRVAITPQNVKLLLKKGFSRVLIERGAGVEAEFTDEAYEQAGAETVDRRNVFSEADILLKVRALSVEGEDSEVDALREGATVISFIYPMQNKHVVDRIASRRATSFAMDMVPRISRAQVFDALSSMANIAGYKAVLEASNHFGRFLTGQTTAAGKIPPCKVLVIGAGVAGLSAIATARRMGAIVRGFDTRSAAREQVQSLGAEFIEVEINEDGSGAGGYAKVMSKEFIEAEMKLFYEQCREVDIVITTALIPGKPAPKLITKSMIAAMKPGSVIVDLAAEAGGNCEATEPGKLTKSDGVTIIGYTDLPSRLPTQSSTLYSNNVTKFLLSLVPKDKKDSYYDVDLTDEVTRGSIVTYDGKILPTAPRPAPPPAQAKPAPSPEDQVASVVALTPWQSQSRQVATITAGMTTALALGKYTSPLFMSNAFTFALASLIGYRVVWGVAPALHSPLMSVTNAISGMVGIGGLFVMGGGYLPGTIPQTLGALSVLLASVNVSGGFMITKRMLDMFKRPTDPPEYPWLYAVPAVLFGGGYVAAVSTGMAGLVQAGYLVSSVLCVASLSGLASQVTARRGNLLGILGVMSGIIASLAAVGFTPDVLTQFAGVAAIGTIAGLAIGRRITPTSLPQTVAALHSVVGLAAVLTSIGSVLGHTGDISTLHLVSAYLGVLIGGVTFTGSIVAFLKLAAKIFSKPLALPGRHLINGTLLGANAATLGAFLTYAPGAPLIGAACLVGNAVLSFIKGYTTTAAIGGADMPVVITVLNAYSGFALVAEGFMLDNSLLTTVGALIGVSGSILSYIMCVAMNRSLTNVLFGGIAATPQTQTKIEGEITKTTSEETAEALLNSENVIIVVGYGMAVAKAQYAISDFVNALRAKGINVRFAIHPVAGRMPGQCNVLLAEASVPYDIVLEMDEINDDFSDTDVTLVIGANDTVNPIALEPGSAIAGMPVLHAWKSKHVIIMKRGMASGYADVPNPMFYMENTKMLFGDANDSCNAIKRALEEKIKGL
>Arab_Me14_ctg01_-_Arab_Me14_ctg01g154t1
MSLPILFTIPPSNRHEFLVLDGTSKPTLKALNKQVTSTLASSPNCAEFMGKYKASGGASQEVIQEFRVHWSSKEYDYKVWPEFTVVTEENLGAVLELLQREPKSGVLEIKVGKAE
>Arab_Me14_ctg01_-_Arab_Me14_ctg01g155t1
MSPQANGNGTNGTNGSAHAPTENKNGDLYRDYADDRNATSEEVTYTTSNGVPYPHPYEAQRAGENGPLLLQDFHLVDLLSHFDRERIPERVVHAKGAGAHGYYTTTDSLEDLCLADIFKQGKTCPISVRFSTVGGESGSHDCARDPRGFSVKFRSDEGNWDVVANNTPVFFLRDPAKFPHFIHTQKRHPSTHLTHADDSTNFWNYASQNPESIHQFMILFGDRGIPDGYRKMHGYIGHTHKLVNSKGEWVYMQLHFKSKQGTGFITQEDSANYSPDYSTKDLYQAIEKGDFPGWDVMVQTMTAKEAEELWENQKINVFDMTHVWPQDQFKLRKVGEFFLNENPQNYFAEIEQIAFNPAHLVPGIEPSADPVLQSRLFSYPDTHRHRIGANYQQLPVNAPRVPFRMGNFQRDGQMAFYNQGARPNYLSSIQPIQFKKRSVELNQVHGAFQGEAIAFLSEIRPEDFNAPRKLWEKVFDDGAKERFIKNISGHMETCTDEETIKRVISIFREVSDDIATRMEKATGIKGYAGISDLQFNGSHNGMTRDDSKRAANGKEKKYHERNGAPQKGTNGIPCWLLDPAAGGAPLGIWAVRWLAGWSTCNFVLSLVRIGQASRAPHLLSSNASPAIQDARPHLFSALGARVSVCREPRWRPSGEQGASRAAGHVGSSVPGVRRARPGWRQRQLHGGRAMSFTRSAAAVRSSEEALERIPVPAFVPLSAPPASPPLHPRPSCEPRAAFIALPVHFGSCAALRQRTANSSPSPSPSPSPFPLPTLRCHHYPSSSVPPTTRPRHAHSAHHNAPDRQSASLQPTIPSNRATVTATRAMSPRRSSRARTTQPPSNAQTAHSVSSSSVSSARTDRATRTDYKQASPHKSSTPHSLSSEEPEEPLHDAHMDRPLTRRRTREQDVDEDDPTKLDDDLDDDMVEEDEVTRCVCGYQEYPGPPSDATKSLEGDDLSGLFIQCDICKVWQHGGCVGIMDEAASPDEYFCEECRKDLHKVTTSPKGQKYSRYLPVYDQQHGKKARKSSVSKETVSPSSRHNDRNARASVDSLGKRRSTMNSRAAYDEDEVLRKVLEESKHEGAPPSENGNRKKRSRDDSEETKPEVKRQRTNSRTPSNSPVVESEDDSTKASAPKQKPRGAAARSQREKEQREKEREQERTEAANRRKGRAERRKADELEASEVTPTPTEEPIMPAIASASAPPEAPIETLKPAPAPRRGGRPPQKSRGRLGRNQYSRDTLPAVNGVSPANEVANSPQTSGTNGNNNGHDSSDGATGHKIAKTKNSRLHKLSWNDIMRPAGAMQSYIAQRQVEMAGEKASPAPAVQPPTNGEQHQAEAMHADTDLSAFKDLNTTQMMDYLSRDLVHWQKMVIDQKEK
>Arab_Me14_ctg01_-_Arab_Me14_ctg01g156t1
MFATPVIAPMNVIPSSYSKHGSRRPEHSLSTYSTGSHFSADSSPATSTLNLTRSRASSDASNSSSSAYSAFSLRSSKHSRNTSTSTTASSTPSVGSTKRTGPFRALSDSLHVKRRLQKKPSSQQVPQCQSDPVSVPTSMLTPVTILGPERVTNLQRADLLIRCRDDDYHVDRSIMCHHSQWFAKVYSKVNSPKMAKRIVDLSADDPGAVAAMIQYCYQLDYGDTRSDSNPALYSVVTLRPHLDTYLLAERYGMPGLKNLAAQKFEKLSIAVLTTVGNEDEFPQSIRDLYAPSRRTRGNELRRTAVKLCADHLGSAVLGIGKEVSGILALIDEIPEFRSDLFKEIAKRWK
>Arab_Me14_ctg01_-_Arab_Me14_ctg01g157t1
MDRQVKRKRAFSQAFQLMAQARHGENNDQTAKRILSYSLGSAASHFQDPYEENKIPSILDYSSVPESIPGTQIRYPPPVNLRYANSALYNYASLQFELYGNGPGPELESSIGVIPSYVEPKRQFEGPVLREAALPTPQIVRGKSIFGPSPYIRPSPYIRPSPYIRPDYNFSSNDLIESYAKPGPAIYGDADSPMSDATTAVGPLTPSALKFSDLSLNSQGYSLPSSSLRDENQVNRATVRVVPTSSFASLFPEIKPNEVIILFDKGIETRKVDKYPLCSASRFFANLLDGPFLDPCLTLCIRLRDDFPYAITTLLHFVETGSYVWDPQAFRKYPRLTTLDFNVHSYLVGSKYGISALRDRAIHAYLSIADHEMKLGFSALSGDCFPDAQIPLSGTSDVSPTNIDNDGEAVTMPIDRFLNSLVLLWKNTQSRHDMMRTAVLELIKRDLNNLLQLPFFVTLMTELVRFGDDVVASLGDDGFEVKAFQTPVGGRRAFTMMFGV
>Arab_Me14_ctg01_-_Arab_Me14_ctg01g158t1
MDAASTNTSGQRAFLRTCSKTISPPKNLKHETEEVHDGPRKRRRHAADLDNETSTKTDNFYSPVNHAFYAEHPYRSLDASKRGIRLLKVSRNAMTGERNFTLTEEIPLAVARDTYTAISYCAGDPKDTRKLLVNGLEFNAFASLARAIDETCHYCEVEHDEAHPVLWTDQICINQSNLAERSHQVSMMYDVYENARAVAICLSTSDTGNTESPAIRWLKDIHNHIPALLEFEEDVESSAWPLKWNPDVPENKFESNLEENAPGHEIFREFTQLFRSKANDREFSRGQLGFFDLLQARWWSRAWVVQEFVACRNATFITGYEHTPWMSLATVVSALAALQFATSPKSWSLYSPSTSVDGAKREFKLLDSEVVASSTISLKMCSNPGQPKSTLGSMLHLLDPKRRAASDPRDLVYAFLGLADPGYAIKPDYSSNNSLANVLLRAACRIIQYERSLELLLFALPRSHDLSLPSWVPDWTNLTTDAGSRPQGCHAFAWRDPEAKFVSNNTVLEVTGFPLGTVCKKQPLSSFCHIFDKYRVARGCYIHVGDEVADGDQPWILFGVGSVFVLRKVKTTFRLICKARVEGPSRKEYVVGSKTCKPERVRIS
>Arab_Me14_ctg01_-_Arab_Me14_ctg01g159t1
MGNGAKAQQKRDRKGDAGPKEAKSQLKSNSAAQTVKCKTCFQTFQSTTNRKLLTEHASNKHSKQFADCFNETDGVAK
>Arab_Me14_ctg01_-_Arab_Me14_ctg01g160t1
MGHHHVQVSRKTRLRAVIAISFCFFVAEISVGFYTHSLALVSDAFHYLNDLIGFIVALVAVQVTERKDAPQDLTFGWTRAQLLGAFFNGAFLLALGLSIALQSIERFIFLQHVEDPKLVLIVGCIGLTLNLISAAFLHEHDHGDGHGHSHAHSHGQPAHNHDDVESLSTVSMQDHHLEHLHLSLAPSKHGMDLGILGVLIHILGDAINNIGVIISALIIWFTHSPSRFYADPAVSMWIAIMILISAIPLTKRSGKILLQSAPLGVKIEDVKHDLESIPGVLSVHELHVWRLDQRKAIASAHVVVSNPDVESFMGKAKVISECLHAYGIHSVTLQPELSVQRVSDDEATEVGSAMTTARLSSEKCGVPCGSVCEELKCCK
>Arab_Me14_ctg01_-_Arab_Me14_ctg01g161t1
MIMRWLLSFVVLAIAAVVKAASFTGNRLLVVLDEQAEREKYSVFLEDLTARGFHTTVESPKGDKVALFKHDERTYDHVLLLPAKSKGLGPALTANSLLEFVKKDGNILVALSSEQATPTAVQSLLLELDINIPSDKGALIVDHFNYDSVSAADKHDVLLLPFPAALRSGVQNYFGGEGHIAVPRAVGQVLGNDSPLLSPILRAPSTAYSYNPKDEAEAVEDPFAVGQQLSIVSAIQAHNSARLTVLGSAELLQNKWFAEKAKLGDKAVTTANREFATKLSAWAFKETGVLKVGKVIHYQDDGASKKLNSSIPESNPTIYRVKSDVHYQVEISEYSNDRLIPFVPAVNDNIQLEFSMLSPFHRLNLSPISQTANSTVFGVAFKTPDQHGIFNFRVNYRRPFVTNIDEKRQVTVRHFAHDEWPRSWQISGAWVWIGGIWVTIAGWLAFVAVWLYSAPSEKSAKKTQ
>Arab_Me14_ctg01_-_Arab_Me14_ctg01g162t1
MSGIPPSPRFYQQPLRYLKWASFNKPAYFYSIVVGCAGPILVFTVPSIRRYLGEEPIPKIPLTYPIPKGQRPRPTGFDDE
>Arab_Me14_ctg01_-_Arab_Me14_ctg01g163t1
MNQAEDVEIILGHKRRYKFHSGTLARNSTLFAEMLSERNAAKLSSRARSAGVKIRWMVELTRLPDEQFPAGHLELVELTSTGERADGRSGLVVNENGRIPQANQAFANYESILYAFYNKELAVDDTDMSAALFDCYQLLQISDYLGCTGLISKPIEVALFKHGQDLFRAIQGVPYAWIELAYRIRSELIFRECVVHLVGNWKVFKTKYNMIDRLRDIPSVRGLVENYHHILLEKCKSLELSVLSHYPQVIRLPSEDLPIKRESYGKDILVWMALTFFRHWVSQRLITGKGRDAPDCGYELFFALGNGGDAYMDKSVINQFHTRFPMTKKAMNVLENHLYEFKECIKKVVDDSKVLRSHCQLDVHRFPVKYLTCTEFARDDFPWLKEERETRVMPAKRTYKLGGNEIARSNLETVRKLQRSFSGERQEELEYSEEEEVVVVVEPEYESETGKRMRYE
>Arab_Me14_ctg01_-_Arab_Me14_ctg01g164t1
MASFAYKTLFEASILAARASDNDRSAIQDYRSHCTYDTCPLSASYWGYRPSLGANLAFLILLGISTLGYIGQGFLNKAWLGFTIAMVCGCALEVIGYVGRVLAYNDGFTENPFLIQIICLTIAPAFLAAGIYLCLSRIVSTFGSENSRIKPLSYPRIFIPCDVASLVLQALGGGIASAKTHQNEDPTLGNNIMIAGLAFQVVTLLIFIVLALDFATRTIGRIRKLGQDALDPRHAKLRNSWHFKGFLIALSFATLCIFTRCVYRVAELSEGWNGHLIKTQRYFIGLEGAVIVAAVLALNIFHPGLCFREALDARTEPKKRSNKTWYGRKRNVATEQSSEEGIRIEK
>Arab_Me14_ctg01_-_Arab_Me14_ctg01g165t1
MNPLKVEDLGGIQGDILLNGLPKKAEIFCFFTIRAAQGFCQNIQKVANSNIATGKDIKDLREQISKLDKGNIIDVAKTNIAFTSRGLTKLANVQTSLQNGISGLQNSAPSFVGGMQKDSERTALGDPVFNNWNLNQNGGGPIDGVLIVAGISMPTVENELKNVLRSLNTGGEVVAELFREVGFEREKLPGHEHFGFNDGISHPQVFGINDSPSLTFKLDDVVQSSDTSNFVDPGVIVVGRHGDENNPKPQWMTDGSFLVFRKLEQHVGKWNDFVVNKWQEAGSRGPDQFGAQLMGRWQSGCPIQLQDQRDDKSLALRNDFDYGGVTQPGVCPLAAHIRKAHIRNHFNPSRIMRRGIPYGQDFKNGGADEGRGLLFAAYQSTIENGYRFIQTAWANQPGFPSGGAGLDVTIGQGKATDAPTPFQIGSKSVNINPINDFVTPKGGEYFFAPSMSVLKAGFNIDKFQAKL
>Arab_Me14_ctg01_-_Arab_Me14_ctg01g166t1
MFRSGLVPALCTYLTSLFPYAGYEWNRSSPLRSSPNTSSSMYPDRPIRPLPARSLRARLSPEQADSIVFPTNPPSTGPLFNFPYTSSERGNRALRTGENDHHACHCGHTHSEVESEEDEDERGAPLPSSPSYHYSRSAPGRTAIAASGYHKPGSASSSVDGYESFENTNNKKKRKIPNMGSNSSHHTTLSADVASMSIAHAHENGEVDDGTARYGPAPSTPQHNNSGTGIAGAGRGRFGRSGSGRSERRVLGNSTNLANAKASKRPSEQSGIISTAIANAQATPPPQGNENVSLLQQEAAKNSATKTQFTFTCGSDSANKMVWPGQENGPYPQPPGAYPTTTAPPPPQPQTARARPPVRPDAHVVSTQGTQTSPNMNGVHPPSNRGAPPPKAGQAPQQAPPPRKPTRSASKLYAYAARKRRTQQEYANFHNPPSQPWICEFCEYEDIFGRPPEALIRQYEMKDRKERRRLAEKRRLLEKARMKGRKGKKASKKAQNNANNAQHAQNPPPGGYDRRDDGLLDPEDDYDDYGDYDDGPNQPCCHHGCQHTHPPPKVPPLPPADPRLGMAPVSNGA
>Arab_Me14_ctg01_-_Arab_Me14_ctg01g167t1
MVANETLHKYGSDDGWHGVIEEGAEFPPEKDRYHLYIGLFCPFAHRANLVRHIKRLDSFLPISIVKPYPKGEPGWRFDETYPNATPDHIFNSRFMHQLYFRDDPSYTGKYSVPLLWDKKTNRIVNNESIEMLKWLPHAFDSLIKDDKIKGIDFYPQELQGKIDEITPWLTSLICIGVYKAGFNPTQEGYNEHVVSLFAALNKLEKLVHSNGGPYVLGGKLTELDILTYPTVVRFDTVYVQHFKTNLGTIRHDYPVLNNWLKNLYHNVEGFKESTDFQHIKENYTKSHKDINPLSITPMGPYPEVEEGYESDWSKLKPGEVKHPLVVEAGSKL
>Arab_Me14_ctg01_-_Arab_Me14_ctg01g168t1
MASSKTALTMVRSLALVGAIIVFAFGIWSLVIIRDIDNRGENVLDSFQTRLVGDATSWSQFIAAAAHGVARTWILVVASSITTLAILLVTMSNRHYWLRIPSAIVVFVEFTATISSIAISSCSLSVALSIRAFSTPPYVTLDSADLAFFALLDPLSRTLAITSALTSAFLIITCTGGLISLHKRHRQKKDVRSFEPTISALGMNRGFYAVYPPPNPTHDAIPTMYDPYRAFRKEPRGPPNAKQVAFTSEGAWMSRKHSRWSASTTSPSGTEGDTMRLLELKRARRAVPVRPERPWSKSWSGREGTHAVL
>Arab_Me14_ctg01_-_Arab_Me14_ctg01g169t1
MSLCVACNKPLVVEIEADDEEQCEMAGSSSGKAPAAAPETVPDDVQLSCECHFHWDCLLEAYHVTECPSCGKNIASVSLSGEQQVLCNLNNEGGLQENLDLLPLLTEESYLKAYPEDRKCRAFLEFCREGDYKAIIDMLQDDEVDEVDEDEDEEMGDDDQPDKEVGIDRLLRYQDPIGEMQSGLHAAVQAQSREVAWLLLLLASNLDLMQFPPEVFQEAAAMGIMRGLTEDKVDIRSLKDANGKFAEDYANEIGGVWNGWTGNGRLSI
>Arab_Me14_ctg01_-_Arab_Me14_ctg01g170t1
MAGGSKRGGFRGAGTGGYKRGYTKKRSPNDEDEAPRASKKSKGDEDEEEDTAPLVPKLQIDDDNNPFVAINNSSKRRVTVSDFKGTTLISIREYWTNEGGELKPGKKGISLSVEQYNALLAAAPILESVLRKKDIEVARPDYEAKLDATAPVEEAKEGQQTTAKADDDDNDHEGDDKEE
>Arab_Me14_ctg01_-_Arab_Me14_ctg01g171t1
MGSTLKVFHALSILSLVTPGINAAPAGAKLELKAFKNVENKIYKRQDAGGLLDTCSYCPVIRRLSSYLPEEVQEQADNLNNQLRDLIAAVGPQLPGGIPALDSLLNPQQGGLPTDILGGGLSGLGGLPIVGGLTSALPTNILGDLPVPTDILGGILPGAGQGGLPTDILGGLATGLPTDILGGLATGLPTDVLGGLVPTDVLGGLLPTDILGGLATGLPTGLPTDILGGLVPTDILDGLATGLPTGLPTDILGGLVPTDVLGGLVPTDILGGLATGLPTGLPTDILGDLVPTDVLGGLVPTNVLGDLATGLPTDILGGLATGLPTDILGGLVPTDVLGGLATGLPTGLPTDILGDLVPTDVLGGLVPTNVLGDLATGLPTDILGGLATGLPTDILGDLVPTDVLGGLVPTNVLGDLATGLPTDILGGLATGLPTDILGGLVPTNVLGDLATGLPTDILGGLATGLPTDILGDLVPTDVLGGLVPTNVLGDLATGLPTDILGGLATGLPTDILGGLVPTNVLGDLATGLPTDILGGLATGLPTDILGDLVPTDVLGGLVPTNVLGDLPTGLPTDILGGLATGLPTDILGGLVPTDVLGGLATGLPTDVLGALATGLPTDILGGLVPTDVLGDLATGLPTDILGGLATGLPTDILGGLVPTDVLGGLTAGLPTGLPTDILGGLVPTDVLGGLATGLPTDVLGALATGLPTDILGGLVPTDVLGDLATGLPTDILGGLATGLPTDILGGLATGLPTDILGGLATGLPTNIVPGLPTDVLGAIATGLPTDILGGLLGGLPATPPTNTTGGLLGVLPAVNSLLSGATSGLPVVPAVLPAVTSLLGGLPVVGGLLVGPTSALPAAPAPTGLLGGLPAAGGLLGGLLGPTSAVPTAPAAGGLLGGLLGGLGGATSAAPAAPTAPAAGGLLGGLLGGLGGATTAAPAVPTATGLLGALTPPKTTVPRIIQSGTIVDKAYNWSFYNNGAVQVEKNFLFPRQGILSGLLPDRTFSGLFVDGLHIGDHVVPYPPSYLPLLSGVKLPLISSLLSTVPDDDAEDTGKR
>Arab_Me14_ctg01_-_Arab_Me14_ctg01g172t1
MSTATANKPPATGTPARSTPSRVSPSSPAAANRTPARSSTPTTNGTATGVNRTRSVRSGANGAPVSARAAVKKPAPPSALRRNSSQVDSPTEEDSAAADEQAAFLQNLKERLLKAETEAEERQKQIEVLNARLDDAHAEQSKLEERAHEEEEKVESLENEKREITRQHRELEGIYEAERAQAMKEKESTQTREEELQQTIQRLKETMATKNVQGVDDGEAPLSRASSFRNNPSRTNSSQNLENFAPPNSVQRSNSRNNSKLIHQKDKIIEDLRLELAEYQVKMLEVENAGGGRTRELEKQLLETRMTNARLMEDNESFQLLLGEKTLNGDLSRGDFLRESSHTEDRAPSRNGPSTSLADELESAEEAPDVELVRKLEAEVNSMKDQNKALTLYINKIIGRLLTHQGFESVLGNDLDDSAKPNTNKDLPPPPPEKESEAPAGFLQRAKSVVGAGPRKQRPTSIMGPPTSAAAVHEDPSTAPSIPISQRAPSGGNPHRRSASILPDAANIVNTMYRMPPPAATPGQTSPGLVSPRNSFFGIPIAGQNTSNPTSRAASGQQNIPEDREIDTASVMSGTTTTSGGASGHVDTPSPPRGRLERSDTSGPMTGKGMRPLRLVQNEEEASKARKAANRQSWFGGLFGASNPANAQQQQQE
>Arab_Me14_ctg01_-_Arab_Me14_ctg01g173t1
MSRVSTPSLPTFHASNGGSTSSRPGSPRLQPPAEHKRSGTPSPKQSITASYSILSRQETAQRLQTSETHGLASSDASARIHAHGRNELPHEEPEPLWLRFVKQFKETLILLLLGSAAVSLMLGNLEDAISITAAVTIVVTVGFVQEYRSEKSLEALNSLVPHSAHIVRAGQEHSRATGTATEEIELDHLKDTTAALAAAKRKSTTISATLLVPGDLVLFHTGDRIPADIRITHAADLSIDESNLTGENEPVGKTPDTITPPSGTQRAPSPFYASEGAGTVGADIRLNDQKNIAFMGTLVRSGYGQGIVIGTGGNTEFGAISASLQEIESPRTPLQLSMDQLGKDLSYMSFVVIAFIGLVGLWRGWKFLEVFQIGVSLAVAAIPEGLPIIVTVTLALGVLRMSKRDAIVRRLPSVETLASVNVVCTDKTGTLTTNHMTVTKLWHFDELAPIDVKKKHDTDNLDSPTRNILRIGNIVNNARLLSDEAASASTAAVLSSTMGDDNSLARSRWVGQPTDVALLDLLDAFSEDDVRERLGTRKFETPFSSERKWMGVVISGKSGADLNSSLDVSYIKGAIERVLDRCDAYVNAQGKEANLDQSRRQEVLRAADAMAQEGLRVLGFASGPARKKASSGTLTPAASSASAMGDDEHYRGLVFAGLVGMSDPPRKGVEKAIRRLMAGKVKVIMITGDAETTAVAIGKSLGMPINANSALGRSVIRGDELDQMSDEELSRAIATTSIFARTSPEHKMKIIRALQARGDVVAMTGDGVNDAPALKKADIGISMGKLGTDVAKEAADMILTDDNFATILNAMEEGKGIFYNIQNFLTFQLSTSAAALSLVLLSTFLGFQNPLNAMQILWINILMDGPPAQSLGVEPVDPAVMALPPRPRHARVLTRKLIQRVLQSASIIMLGTLTTYYREMSVDNEVTARDTTMTFTCFVLFDMFNALTCRSSTKSVLTGEIGVFDNKMFNYAVSGSLVGQLLVIYFPPLQHVFQTEALGLLDLAHLIAVASCVFWADEGRKAYLRYQTRRGYGGGYSTALANATGTLLILILIVIVILIAAVEQPLFPAHDPEQFPQLKQPC
>Arab_Me14_ctg01_-_Arab_Me14_ctg01g174t1
MFLPEDLLFKSGQLARVWLAANQHKKLTKAQVLQDKIDEDIQVIIRPEGAAGGPLALRLNGQLLLGVVRIYHRKAHYLHDDCNDALWKIKMAFRPGNIDLPAQTHVANPTSLTLPDMITDLDLLAPMPDPALLLSQTLDGDLAFGNTTLSDWDASQFLSHSVEQPRQPEMELDDEDQLRLDIGEDFEPLHLPFDEGTSIEVARRESLQRPREEEFGTELKDLRDDMEFQVDTGEDMTDLAHGTELNLGLDTEMGGMAGTELPLPLPSSVAGDDVPQLTREDSPLSELGEEEATRLAQEVAEQDPTVFEPEQEEESIHQARAKRRKVITQDAETMISTAQLRDQQTNRDKILKQASFLPRDPLLMALLNMQRSGGFVSSILGDGRSQGWAPELRGILSLELVSRPSKRKRDNAIAGLEQTEGEAAVEVEKTPQLEIEQDEPTLGVDDFNLGGDPTIVEDDEIIHLPSDIGARPVEEEEDEAFSPIPDNFDDTTVPLYHPAESGPISLGTKHAVHLLREQFGPDAEESESMRQKNTIVFQELLPEAQTSRADATKMFFEVLVLATKDAIKVEQPGTALGGPLRIRAKRGLWGQWAETAASGELASQSQAAAQTTAVDAPAESILAGPAEVSVSA
>Arab_Me14_ctg01_-_Arab_Me14_ctg01g175t1
MLTRHPRIPNVKSAQFSLYPFRTRALVQLAASGFRRTLATTLNTPPTPRFTDSPAPKTSSVLYARTVTNMDTNILAVDPQRLGGITFTESTTDLIEEWHIDYAEGKDYQSLKRAAEEITNTDTPVAFPTETVYGLGADATRSSAVKAIFAAKGRPSDNPLIVHIHSLPQLRELLSDNGASQTEVDPIPAIYRPLIERFWPGPLTIILPVPEKTVLAPEVTAGLTTFGARMPRSILALSLLRLCGRPLAGPSANASTRPSPTAAEHVFDDLQGRIRTIVDGGPCEVGVESTVVDGLSSPPSILRPGGVTVEQLRQCPGWENVTIAYKDKQEGGASKPRAPGMKYRHYSPKAEVILFEAGAARPGTEEVTRKSKVGIIRTKSWKPALGLTAQDTSVRDANGQANGTAHADTTSTNPAGASSRLSNLLRSVIQHQIPHAQRHTLDSIDTEVWDINLGAETEGVARGLFSALRELDKKGVEVIFVEGIDDTTGDDIAAAVMNRLRKAAEIRT
>Arab_Me14_ctg01_-_Arab_Me14_ctg01g176t1
MHFPSTLAFLSSALALALPTSAHGSLTGPSISPSLSTATTTTTDPYMNTETRTARSAKKTKTAFATVTRIMATSAYVTTSATASHLADPPCTKGECEEEGNGNGRTSATVEMGTEIHADTDLDASAAPTTTATTTTTRPSSSRAISRLTRAANSTGRLGAMGIVSVNNAAMGTLDTAVTGGVPGGSFKPTAPDRESSAWDAERTSLLSTTPPATATAAAAAAAAGGTTTSRSASHAAGGDGDGWGLGGFEWPGFGAAETTPSTSAATSIAPASAATLTTHPGDGIAWSGTDNAIRLQLHDRALLGPGGMGKGELRRGLRRHGGNGGDVRQRECRVCGTEGKVLCRGDVAVGVCEEGCLVMKMLGKGRGNGCEDE
>Arab_Me14_ctg01_-_Arab_Me14_ctg01g177t1
MENIADRPTSELDHIPTAWLLTGLVVFPFVIYQLLGFLSPLIHNLTAMRISEIYVYPIKSLRAVPLNEAVATQYGFEHDRQSGYRSSPDTEKLEHFGVDLLSSATDAFNMGEKYSRWFSECLGYEAVFLYVGDNKRAVIFQDMQPLTPDPLTAFFKKNIPFLGRYVEQLMGIRQTEPWRIKFHDCAPFLITSKTSLDDVSARLEGEKMDMTKFRPNIVIEGANEPWQEDYWGKIKINQKTEMIMAHNCIRCQSVNVDYNTGKPGLGPSGQVLKRLAKDRRIDQGAKWSSVFGRYTFWAPNAPKSQTIKVGDKVHVTKVNEGTTIWSWPGLGSIPKPS
>Arab_Me14_ctg01_-_Arab_Me14_ctg01g178t1
MPKDSRVSASFNTTCAVSAALYWLLCACIPSTNSLRHLVTLVERSQARAEAKILTTCHQTTATVQLSKQDHALKNARPTSSAQATQSLSLVLLTWKPASSVAHRAHPPLCACSPRLPYKATLQGYRLRAQNPPTMANTQIRRKDTTKGPPLRILSLDGGGVRGYSMLIILQELMHRTFVESEGRAPKRHEIPKPCEHFDLIAGTGTGGLIAIMLGRLRMDVETCKDVYVRMTRKVFETDKTFAGIPYRSTLFKASKLEEAIMECVREHTIYDDEGNDNHDGLASSADLGAPMTPGSALHQGRIHRSASNASRYSQIGMAPVNMRVAAMKWGNPHALLYDNREERTKTAVTAVYKGTKKAGTGQIWLRSYDSRKVGNEWPGREIGVFLSIGTGKRPDGTSTQEHLWWEGFVSGGIGDFAEARRRLISKIEGCEKTHKEMKDHLARRQVNPENYYRLNVNVGVGEFGMNEWNALSEISTNTRMYLAEKDVQGMSLDAAAKIARIHRAKLRWERAERGQNPLAAASPPPSKPLPTIPDRLASPSSFPLTGHLRWERAERGQNPLAAASPPPSKPLPTIPDPIGFAVELPAEELTPEYMSTMQQSDLRPAPLQPHRPQHQDNDKYLVVSSDEFPQPVGSINDMPPRHSGELVSPGRTSDEQFSTDRPMSYAGSPRISYEPPPRPPKTPLQDGKAPPPLSAHPAFRTSPSHRTSPPPGGAFARPPPGAPLPYPDDDGPPPVVNKASKPEYTR
>Arab_Me14_ctg01_-_Arab_Me14_ctg01g179t1
MAVRFIPADQIDETFKSKYTDLISAPLGSKIVSFSDEWFAAASNLTTKTAPISRPGVFVHSGAWYDGWETRRHNSAPFDWVVIRLGTASGRVAGVEVDTAFFNGNHAPEIAVEATFADSDEDVKTEAYAAWEPVLAKQECGPSQRHGWLLPAVTDKAYTHVRLLMYPDGGIARFRLYGHAVPVFPAAASAVFELSATVSGGVATSCSDQHFGTKDNLLLPGRGHDMGDGWETKRTRGDHVDWVIVRLGCSGQIDHLVVDTAHFRGNFPQRVQVFAGRFDADPAHDDGAWVEVLAPQKERAGCRDGVPCRAGQCPGPDVFARQAGDYPPTAG
>Arab_Me14_ctg01_-_Arab_Me14_ctg01g180t1
MDITDREHGFQDDPPPARQLPADLPTSLNDRRPVSAYLPEETEMYDAWQGQSFLTTPMPARPLSFNLSLDDPSFGDEDMQQLEDSDSRLVQMLAHQARLKNDNAGDEAKVVADDKLSHQEKREALQGLFTLATSNGELERVKRLLQGKAREYIDTDAVDAEGTPPLVYASCFGHDDVAAILIQEGAKVDIQDKNRWTPLMWAMTNRHKGIVKLLLDHGASTDVKSSGGRTAFDFVEPNSEISDYLHESGYAIGNAGVDDFYNAGLENDRFEQEMQENDMKRRMMMESAFNLEVDIGNLGLDEQPESPEEPEEGQDFIWDRCLNDQMFVFQESELERILDIIITNMTPQRSPSQKPVPANILFLAARYAHYHASADLLETLLVSAMGKINQVVDKYQWDMTVLAFWMSNATLLLHYMKKDTGLATAATEFQLQMAELINEIFILIIRDAERRMDKNLDSSMLEHEPMPGFEDVQFQHEWKIFRSKPKAKPLEPLEKRFRPPSPKARAKPSPRNITSLLSSTLFVLDLYDVHSVITAQVLSQLIYWLSAEMFNRIMSNRKYLARTKAMQIRMNVSTLEDWARSNNRQPEHYENGSMTSTGDNTVESTRKHIEPLIQLLQWLQCFTSIGEDLESLVGTIQQLTRLSAQQLLHTAKYYRPEVGEKGLPKSASKYIVHLQQAAAERKTRARSPNPSQRGADAEPTTPIKPSSGATLAPEPSPAPSRVSGELEREEDDAPSELLLDPSYMLPFSLPTSTDMLISYGAGFGGVNRERERKYIPTVPPEFMAKLDLSGGSKNGGYYEESQWNDPSYG
>Arab_Me14_ctg01_-_Arab_Me14_ctg01g181t1
MPMSEAPHMSPETRFSAIFARLSELPNYVWDSDIEPFHSSYDNWHFFGHQTASYANERPPSRGRSAIASSPASHSPDAHRPSVVLRHRSSGSDASSTTAKTHATATSVHKEGRPVVCRVSNHTLRLEREYQLSKLVVTKSDPACRHFVRPIEFIRLPTKPGEEPLVASIFEAPGQNYLKDLVTFGPNWYNLTNHDKTSEPTSHQPSTGVPLLTFLDFAVGATECLEILHHGHEMVHGELRGDAFHFAENGHVKMINFGSGARSFENGLTSAGWNTLSREVGIELKLAFIAPEQTGRMPAEPDSRTDIYSLGILFYTMLCGSTPFDGTTALDVMQNVLSKRIPPASSGRIDIPEALSLVIQRMTQRNIEERYHSTSGLKFDLTRIRELLSEGDGEGLKAFQIGSKDISCFFNLPLQQIGRDKERQTVIDVIQRVAKRRRGGVKVLNSLSSNSSFSDGRLEFQYDDFVSDTSSSRNSESRLNSVPSSAPVFLDQTRTQWSQDSTTHTRDSTAEESPSGRPHLLTTGRGPSNNSIEALSSLSRSSPSNDSTAARNTSSARAMRRKGRCEVIAVGGATGLGKSRLVQSVQSTARSNGYFASAKFDKTKRAPFDPILKVMSSMFRQVFSEADVSTEFHGSLRNFLKNTGVWAALRSYLNLPDWLLNTNGATPRTPQQRDVDTLNASRRASSPALHCGSSGHTAEAWLRSGGASKSTKFMSVFIDVLRLFAVQKLCIWTLEDVQNADSESAELIHHIVQAKIPLVLILTYTDEEGIPRELRPSMHAATKVQLFPFTEAQTADYVAETLHRDHQYILPLVAVIQEKSRGNLFYIREILDTCYRKQCVYYSWRENNWLFDLDKVFEVFESTEYGSSVTNDFITKRLLELPPDTRKLLAWASLLGGAFSYDLISKLLNPKYAPADAERLPLFGENECIVTALNGALNAFILMPAESESRFRFSHDRYLFAAASLLEKDWNTSMMHYEIARIVSSGGEWHDDAMGDSKALYMRSRHICLAADLIKAKEINRAPFRDVLYQAGETASESGARSTGIYYFAHCLMLLQDDPWDESKHDVSYQETLQLFVRSAECYWHQGMLDEALSLIRTTFQHARDPCDMASSFILQSRVHAVREDSFGAFQALKDCLSLLGSPIPSTTWQECDAEFQKIYARLQETDTNDLLAREPSKDDRVAMTLGPVFIELLSAAFWSNSLLFYQATLKLINLHLEHGTTAQVALAYIHLGSIAGGRFAMLNFAADMGAIAKRVFQMYPDDAYTLGRGQTLHPLLLGHLQAPAADLIPHLESALDLALTAGDRLLTLLNFGVQAHFRVIACYDLVEIEAYVDDIPLDLKNWQQDLRGGVLLMASRQYARALQGKTEIRDASTVLTDEEHDSKAYIEWIDKTASNPKRPKTYYLATKLPILVLYGYHDEACALGELLLPMLGSLWCQRLNYSVMYHLSLAYLAVLRDDRKHPKKDQMFKHVLATINQLEALCTITDVNYRSWIHVLAAVLAEVNDDPPTATLNYEAAMDHSEIHGFTLDEAHALELYAEWLIRKKANRPARHALKDCISVYRKISAYGKANHLINKYEFLLRGTVSLTTMDVAVQTTMIDTGNTSFRLEQNEDQEQLLGTETAVDRTQNWIVPETGRRHESSHDLRDGFSAVGLDMLDLSSILESSRVLSSELKVDKLMAKMASIILESTGGTLCGIVIEDAHIEWSIACVASNEANSDNKDSSGVTSFPPGQPLDTVDDMVARQVTLYTLRFRENVFVQNLLEDDRFSNVSDSYLKRNPEGKAVICIPIVHSDHLLGSIYLEGPPNSFTERNTQVLRLLVNQISISLANALLFKEIERVSASNEAMLEMQKRALAQARAAEIKAKEAEAIAVRNMKLKEEAAKAKSLFLANVSHELRTPLNGVIGMSELLKASLLNQEQQGYADSIRVCGDTLLSIINDLLDYSKLEAGKMNVQEMPLSLNETITEVVRALAYTNAERGLKTIEQLELNPEMLVMGDPVRLHQILMNLLSNSYKFTPRGSVTVRAVVDQEGPDWVDVTCSVIDTGIGIPEEQKKKLFLPFSQVESSSARSYGGTGLGLSIVKALIENVMHGRVSLESKPGVGTTVSFALRFTKVPLARALAQNYTRDADPMAKFSSQENNGHEQSSGTCIDLSTIPRADLRICIAEDNLINQRIAISFVQKLGFKCDAYLDGFKTIDALERASDNGRPFHLVLMDVQMPHCDGYEATRLIRKHSNPEVRNVLIIAMTASAIQGDREKCLDSGMNNYLAKPVRAQTLKALLESYLNKTEAAKEIPNLQTEVKKLVSEALSEAGAGQQLDGAKREADGSRSSMDEPESRSERPRGVRMSTTVRWHDGTPDEPDGQNGS
>Arab_Me14_ctg01_-_Arab_Me14_ctg01g182t1
MSTSTPKPSTGSGWTDRERLAYLLSLLEHSGAKPNIKTAPLPSGRSVIACERMLSRLKAALKGELDALRDGAAMRGCTNGDATNATTARDSEGSGSQASKATRGAAARKRKGGDGAAAAAYADADADADADVEVDGGVKKRSRNAKAGAKARARAKDSTIEGRGEVEWEGGVKKEEDEAEAEEVDTKEEEV
>Arab_Me14_ctg01_-_Arab_Me14_ctg01g183t1
MASAETNKPKSWSDRELLVYILSVIEHSKVTINYANAPAPAGRNSSGCAQKMGKLKKALRKEIDAVKNGGLAGDAKAKGKRKADFEEGEVEEKARKRGRARKIAEAESEEVAEVSEEEVEV
>Arab_Me14_ctg01_-_Arab_Me14_ctg01g184t1
MTQSTSNTQRPVATRQLTTTSGDFCQSNSPDVRKHLGTYGLTPPAVESYDVQAQRCLRLLAMKATPLEKFQYLTHLKASNVHLFYRLLSQNIKELTPLIYTPTVGEACVRWHEIWTQPEGMYLSFSDRGNLRQILDNWPHDVDITVLTDGSRILGLGDLGVNGMGIPVGKLSLYTACAGIRPEATLPLTLDLGTNNKALREDPLYMGSRLPKVTAEEEKEFLDELMAALTDKWPNIVIQFEDFKNPFPALERYQNTYSMFNDDVQGTGAVIVGGFINAVKASGVPVKDHKAIFLGAGSAGVGVAKQIVEFFKKEGLTEEEARRKFWFVDSNGLVTHDRGDKLAEHKVYFARDDNNGRQYQSLARLIDYVQPTILMGLSTIGGAFNKEILQKMAKLNNHPVIFPLSNPSSKSECTFEEAVLNTEGRCLFASGSPFPSMEYNGKLLTPGQGNNMYVFPGIGLGAILSKATSVTQDMIYASAESLSTSLNKQEVADGWLYPDIRRIREVSVVVTRGVIRAAQQNGVDRASELRDLSDEELDAYIVESMYNPFKDGEQLGEEVAQLVAQTNGVNGVTNGVTHSHL
>Arab_Me14_ctg01_-_Arab_Me14_ctg01g185t1
MSSCFGFRGRSDDQQPLLPQYRDDTTLQRELHQKLHSYQMIRALGKGFMPSNEQLIINLRTLLAADILNPDNPELSDSGRLLVKFTKQWLHQFIDLLLHKNSEDQIQDFLWYLSKARVEVDVADIARSATRSKAKADTFAAYQSLQTVGSLLLTNSDFRIFLSDLNTVGREVFKDTAFTISDVAKEVGKKVEPSEAEQKALKEPGADAGNGKAVSSEELNGEVTEVAKAVGSGVVEVAQETGNSIVDKLQGAEGDSLSYRLKKTVTNLRQKRDYSDSVSTLSLLLQRYARTYSRMAEEAVGTVQNDVDTNREMDKAVKNFWLLMSSFGDRNEWKELETRFHKLLEHSKRDPAFEDLLMDIGNSLQKLLTDPDFFDHVDEKFQELRKKSSSVGNESSLRKDVDAFFEQAQRTFAAVTRDEDVAKLISSTFRIWSILSPQHSYTNTELIQDAINVFVPLIISAIQYVPIPRLEVSTPEIDLLLENLIIEPGKTINHTSFLPFRFKVETYNDFELRKARFRVASKATSKFTIKIDGLSFRADEIGFLLRAHSGLLRLADEGIASFQMDERGLDIHLDVEIGKERQEQILTLRAVRVNIHKLSYTLRKSKFSFFGWILKPLLRPVIRKVMEMQLAKGIADAIHSANRELLFARERLRATRISDPDDLRTFFKAVLTRLTPEDDPDLYTRVGVAAPGKGVFAGKYAPGSVVKLWEEEGRRATERIDDWDEGGWRNDVFDMHTQMLS
>Arab_Me14_ctg01_-_Arab_Me14_ctg01g186t1
MAVAVDSDIDNSYEIKDLQHSLRSANLELSLARSKHSVEAVVKDEDIRKLRVRQCLLEGDNSDLHEQLEEEQARADELEHALDDALLNLDEQKAEGEAAQNQIRTQSREIANLKAELKAMENVTSDSNKILSEKLALSREISSLRPEVEHLRAQVESNQGLLSEKLSLQRQFTTLQVELENEKRTSARTISKQGKKMEQDDDLRNELEEVRNELATEKKDRIKAEAAVAKAEKAVEKVQADLESQQRATEKLEAKLEKLAKKDTKASKRDDANDAALQELRQELDHEKALRIKAEKALKNASSESAEVERLREELELEKKARHKEEKAAKKNSQQTGQTGNAQEELEEEKRERKKQEKEYTKTLAELQGRNTVLDEKLSAFREKLRTTKEKLKEKEAQLEKVERAQTAPPSKSAAETTKAAKNIRKRVAASVEPETNLGTPGDVPAKRFKRGTSVSAMGDTSTFSLTPFLNRTGSVAPGSPIAEEDEDAEVDTAPIKAPKLKANPLVPTASVKANPKPRKKTALSTVLAAVSEEAPDASQTSDSENPAAQKIPLNDAADAGPTLKTKKLAAAKQNPRKSLMSFANFTEEPTAETKKKKKRKLGAATSKALFDDDDDDDAVAPSSSQPKPVGLGMGSGKGLFAARALGKSVLGKVSRPISGGFGMLSEEAFAFSPLKKDRRRAGDSILK
>Arab_Me14_ctg01_-_Arab_Me14_ctg01g187t1
MRWFQVLTASLLPFTALAAKKTGDKYTDARAKSLEIGRPLKLDDGGYASLTKGQRDFSVAVLLTALETRFACVLCREFQPEWDLLGKTWIKGDKEGKTRTLFGTLDFIDGKNTFQSLQLKTAPVLLFFPPTVGPNAKVDAQPVRYDFTSGSQSAEQIHAWVSRHLPADVPKPKISRPINWVKIISVTTAVLGGITVIAIASPYILPLLQNRNLWAAFSLITVLLFTSGHMFNHIRKTPYVQGNGKGGISYFAGGFSNQFGLESQIVAAIYGVLAFATISLAIKVPRIADSRTQQFAVFLWSGVLLCMYSFLLSVFRQKNGGYQFWLPPF
>Arab_Me14_ctg01_-_Arab_Me14_ctg01g188t1
MLYLVGLGLADERDITVRGLEIVKKAERVYLEAYTAVLLVDKEVLESFYGREVIIADREMVESSSDDILADADKVDVAFLVVGDPFGATTHTDLVLRARELSIPTRSVPNASILTSIGTTGLQLYNFGQTVSMVFFLDNWKPASFYDRIAENVTIGLHTLVLLDIKVKEQSLENMARGRKIYEPPRYMTVAQCAQQMLEIEEDVKKEGVYSRESLAVGVARVGAADEKIVAGTLEQLTEADLGAPLHSLVLLGRRTHDLERDFLLEFAVDKEKFKSVWARDYEGKQ
>Arab_Me14_ctg01_-_Arab_Me14_ctg01g189t1
MMFVSGETGEPSPETTTLIESIVQDQVQHMLRECTSLATRRGSKSISTDDLFMLIRHDRAKISRLRHFLQWKDVRRSVKDSDDKGGDAGADVGTGDADLAAGVMGGGTSGPGPEAGKKAKRAKVDLVWDVHSFFTEFPPLKDDVEDEEEEEMNFATLQRLKNADERTKNMTREEYVHWSDCRQASFTYRKGKRFKEWAGFGLITDSKPSDDIIDILGFLTFEIVQTLTEEALKVKDAEDAFKKSSGGEQNRLKRKRERGLFDPPEEAREPVQPAHVQEGYRRLQRGNNKSRAMLNFTRNVHRAALKLI
>Arab_Me14_ctg01_-_Arab_Me14_ctg01g190t1
MSETLQTPAERRYLRPSLRSVTMIQPKTGERVKRSFTLRRSSHRNTESTEFLLAPGQFDPARHADLGRMERLWEDFKSRMWQAIAYATSPTGVGILKCSLAYILGSLATFVPQIAGLLGKNDGKHMVATITVYFHPARSAGSMIEAVILAFAAFTYAAFVSFSSMAVSAWFGYQHHLIIGHVIVLIVFCGAGLGLVGWTKHKLGSPLVNVACSLTSLALITVLTKEGAVQNATFSYVKIWQVLKMIIMGCTASAAVALLVRPTSARTEYRNTFIQSTDAMAENLNAIARSFLSGAEQDLRNESFVKTSNKSQSTYKTLVKNLGEAKFEHYVLGTEQEYKISARLVKCLEKLIQSIGGLRSAAETQFTLLAQSNTNVGTPSDGVHANGTVASSIFSEHTLSQSPPQLNSPSLSHTERRTSILASIDELPEPTTGDTSMQPSADVSDDESTQQGNLSRLPSFVQSNLTPADMFSVFIAHLGPPMKSLTYTLGEVLSELPFGPGPEYNMTINEHFRHSLVDAKALFSNAKREALDVVYKTKIPSKTSSAAVAADFEEVAASCGYFSSSLENFAEDMVVFLDVLEELKTNVNRYPRRRSWSWLRFWQRGRKNKRSSSEDTENSSLIDEGTNQTPGGSHEIHNPIYRRSTRGDPYKSEKEQPLSYRTWVALSVFRRDDLKYAVKVGIGAVLYAMWSFIQPTRELYGHWRGEWGLLSYMLVCSMTIGASNTTGFQRFFGTCLGAVYAIVAWIVADESPYLLGFFGWLVSLLCFYIIVGKGKGPMGRFILLTYNLSALYAYSLSVKDEDEDDSDEGGISPEIWEIVLHRVVAVMVGCIWGIVVTRLIWPISARRKLKKGTSLLWLKMGLIWKRGPLKTLLEANLGDTHKPHSYMSEREELELRRFLSHLETLCTAATFEFELRGPFPTKSFKVILGATSRILDSMHAMNVIILKDLKASEGEKEVLKYTKKEWTELSWRISHLFSVMASSMKLAYPLNDVLPNVEHTRDRLLAKVFDFRQTGLGKVIAKDEDYELLYAYALVTAQLAYDLGIIGQEIEKLYGVLSEEDLKVNLRTQKRLAASVVGCGKRKIWLDPNETSEIANANSRQTIRKLVQDGLIIRKPVTMHSRARARELNAARRIGRHRGFGKRKGTADARMPSQILWMRRLRVLRRLLVKYRAAGKIDKHLYHELYHLSKGNTFKHKRALVEHIHKAKAEKARDRAIKEEMDAKRAKTKAARERRQERVQQKRAAQLGDEE
>Arab_Me14_ctg01_-_Arab_Me14_ctg01g191t1
MEDFGENDEMAAMMGFSSFGAKKRKFDQANSPKAQDGYSASGANSTELGVRTKASSDEQQGSEDPLGAVSSVQQTPKPPAPASGLASFLARGQALPEKPTKPTRFPREAPTEADPSASETVSFGGPSISRGELNTLKFGIKNESGDAAYFLPSFVEDPWERLLSNR
>Arab_Me14_ctg01_-_Arab_Me14_ctg01g192t1
MSTTHAYYPSYPSTSYPINVPQKPGYYYPPQQHFGRISASPPEAPDSTTTSGVPSYEVSASSSHYAGSHSDYDSSSGAASVDLLDYMGNRLNGSFDPLPLDRSLAKQAQTSGELNAKHRELLELQALAQRRLAGAQASFSSGMRAAKEVQKDLQWTQKRVDSLNNRAAQKYPDQYRTAQRRYPAPVDY
>Arab_Me14_ctg01_-_Arab_Me14_ctg01g193t1
MFNRDRLPGLPGSSPRPPPRNDGYGQPPQQQPRQPPPQPGYDSRMGGYDDRQQQGYGAPQQRMPARAPPGGSGSARQLRPIKSPGGNAYAFGNLVAVSPQDYPPTPDGSDIYILLNGNYVLSARPTQGCQPGEIGLTDAQRTWAGITLGPQDMVTVQPYDAFSQAGGQSYLGGVEVEVGFAARKTTDVPYDQDELATQFKKNFENQLLAPGQQLLLDVKNIPLRMSIRTVQLVDLSMEKSDTSAPPLTDPRARGILTAHTQVDFFKDARTDIKLKASNRRPAANSIIQPGFKFEDMGIGGLDTEFSAIFRRAFASRIFPPGLVEKLGIQHVRGILLYGPPGTGKTLIARQIGKMLNAREPKVINGPEVLNKYVGQSEENIRKLFADAEKEYKEKGDESGLHIIIFDELDAVCKQRGSSGGGTGVGDSVVNQLLSKLDGVDQLNNILLIGMTNRMDMIDEALLRAGRLEVHMEISLPDEQGRAQILKIHTTKMRKNDILESDVNTDELAKLTKNFSGAELNGLVKAASSFAFSRHIKVGTMAAINPDVENMKVNRQDFLQALDEVKPLFGVAEEELGKRIRGGVIHYSPFIKDILDEGRLYINQVRKPGSTPILSVALHGPPGSGKTAVAARMAIDSGFPFIKLVSPEDMVGFSEMQKVQQLDKVFRDAYKSPLSVIVIDNIEMLVDWVPIGPRFSNTVLVALKVLLEKQPPKDRRLLIFATTTERSVLTQLDLFSRFDAEIAVPNVNTQAELAHVLQESGAFSDRDQQRAISEIQEITGSTEIGVGIKKILTGIETAKQDQDVPGRFARVMSRAIAANRV
>Arab_Me14_ctg01_-_Arab_Me14_ctg01g194t1
MSSGNTFEDLSGISTSSFSNPYQALIAACEDDPAQIQKKYAFHRAARNSQQKAKMLDASFPGVSIDPILLRLSDPTIEPGYVDPRHCLVFWVRPTQKIKDLINRVQQELLTVAPNLWLMPRDCQHITALEVTHSKTAEEIQKLVNQMRDKVPAITDYTSRHRVRLIKPTIGYDASALALSFVPAAGEGLHSGRSSKDDQFTYHHLRRDLYDLCKDTGVVVDSRYVVPSSHLTIGRFISTKDLADEMGSPDPKKMETFITKIEEINRWLEEEFWPEHNDGKIPEGGEFNLGEETGLDYRMGTLWYGGGESVHRGEGF
>Arab_Me14_ctg01_-_Arab_Me14_ctg01g195t1
MCEPCIKWDKQCGAPTKRRLNTNTRSFLGLSTPEYDRPTPTQELVRGNGRRRSTNQASRRASTPAPQTTTLPSRSRATARKSTAATSHSYESEILNEPTAPYSDTSSSVGQQPGRNGPKGETRTNNRLSQVQSKRSAPGINSVTPEHAAALLNSTLIRSSSRTSTRNNIVASRAIVQEATPDDSAEEEAEHTAIDYDMVKVESAGSQLITEINNAARPSPSPAIETEIEDIHMVYAPAPVTEILAAGPTSSPRRHAQVIIPQTTRPRRSRGRPSYVDLISSDGSDQESEDNGKHDNEDYDEDDDDVWDPLDADDESDVDEEVESNATIESSGDESGDDEDLDAVIIDPEPSSALRRRALLGSSRSQYSSAPKLGKGIDLNLPPLSNIHDISVDMASKARELGLCDVLRKLAGCPIDVATMCSGTESPLLFLQLLSEALEAEEQPPLNVEHNFSAEIDATKQAYIERNFHPPILFRDVRQLGDDAATTATTAYGAEEQIPGDLDILIAGFVCKDLSSLNSRKKTVDDQGETGDTWRAIYYYAKRFQPSIVLLENVKSDKNVWDDVVSRWSKIGYEAAWVYCDTKNYYLPQTRERMYMIAINRKLYGKGVEKAVAQWQLTMEKLQRQCSSPYEAFLVDLPVSVVNHSILSSEPEWSLCKLRYDQIRSEQRLGIRRPITQWSENGTLHPPDFANRKWYNSQSSRVYDAIDVAHLQAAQQGHDSMHKMKIWDVSQNVDRFKTGTGLMPCITPGGCGFASNRQDALNGSQTLVLQGMPLDKLHFAGETQRECQDLAGNAMSTTVIGASLISAIIHGYRAFRSKTSPDAFEPNSQRKTLQNQLVRASTMARHELQFADSKTLDVTRLLQEAGLASRMCACEGDQQISEVIIKICSECGHTACAICASNPRHHYVDNITKETRRQTPNEFVSFWKARLPSRLGLREFPNLGTIVSQLQRAHNSNDAYVRRIAEVDLSSRQFSLSEFVRIDNGWRVIYISNDARMELSIGAKVQWLLFVHCSPDIPGNSDLRKALETPIARATVDNSLLDAGWELFVPSHQSHSLRIRGSNERSKSWRNRLGLPDYQTETVPAHIHIQGNTDETSVLDGDYEHLSQCGTAESSLYKRSAEPVLYLFLDPNPIGEVADDSFVFSRDCSRKKYGESRIITTRLSPIWRPWQINDEDGHAVDAVHAGSWVYIPTRLTASTLTPTVSILAPGTPLTGLELECTNAITVLDVHIPEQLPTQKLSEYSWALERVRTAPSLAGWQAVGCRTYGDCVCAPAYPSLLWSVDNAGKATPHEDRKAAAIFERGFKTRCPVFHIQATARKNQTHIEIGINISSLIHRARGRLARSGNVSGSVASSWRLLTDHAEIGPSRFPRFQLRSNATDLPFSGRLRLENKLRGAQPRSLTWMRAQEAGTSLTITEVEEAVHASLGWRAEARAETSVEVRGGVLADLPSFGKTVTTIALIQSELEEHLPEDILKQNQSAANHLPKLIDSAATLIVCPPHIAIQWQTELELFLGEEQYADFDVRIIRDFAELRRLTIEDLQQSRVIVVSWSVLSDDEYISELAWVTGTPEPASSSCRAFDAWMDGINQDLPAQVSKLQTMDLLEFKEATEDRLQQRLQQPEFQATLPLRLQHGSNYQSYEAIQAAAAGKKKYNAKPSLKRKPSRSDGNAVPLLHMFRFNRIVVDEYHYLNDHKKLKNMFTAVSVRKIAAHKRWILSGTPALANFTDIDNIASFLGIRLGRFAVGAGKLTQTEEFLVDDQTAVERFLSKTEVMSRQWHQARHERAQEFLDLFVRQNEASLDHVPCHEELRAVHLEIAHHAVYLELSQHLISQRMQVRKLKNKAESDRTSRLNASLNNSKTAEDALLKAALLYETSRGESGLDTLVQKRSEQRLETEREISRLMRAFEGHKRAGFKGLKPADPKKAEKEENTVPKLYASFAQDIKKNMWLGDADATANARRLLKKAEADPALGGLKELKEVSSDKKVKEAKTIMSHLRESCIELALRTRSERFITTVQQLLQPLYENTQECIPCDAPHCRAEATVSKLYLASQCGHLACEPCIVSRGDDENCVMPGCSCTVQGVNLIKATDLGTTKEKAAGHSYGRKMDDIASLVMELPSDDQGLVFAPNDETIAMLGEVLDHYSIPYYTPVGCNSRQAAKIIEEFKVSGSEDTDDRPKVLLLNLTSETSAGVNLTNANHIIFVSPLLVESQYKYDSAMTQAIARSRRYGQEKHVHIYHFAALRTIDVDILEHRHKRTNGITAADSSACLPPTPLARKEKTKLIQNKEGSMALVPVPWLIDDEVRRKMRVEQEPEKFTSLINFSEMFEDGEE
>Arab_Me14_ctg01_-_Arab_Me14_ctg01g196t1
MATDAKPHQATVEDYFSDDGRGNGVRIEAFTPDPSPGKANVRTKRSNPEELGLDKTPTGRVPSNSDVKSDSGYSSQSVAGMSSADSAASAMSSQRSQPVVPAPAAPAAPAVPAAPSPTPAQRAPRPPQPRQQSTQSIPSAQPAARQPLSRRDSQASRRPPTADRRPTITQPTPKRRDSRNLDDCTVPGCTKCGPDAIEARPRQPRRPSMLHTQPAESAPDVSYPHPYDTRSQLSDPAQYQNASSRENRAPRTYHAQGGPVVQPAISRRLSVNARRPTSYHGDIPYNWPQPGMHASHPSPPQEHGPPLSRSAVYGNMPYGQPPMPSPHMQPYPNPNPNPPPQAFYQAQQMQPVYDQQRPPLQARASASSGYGYPTTPVLQVERTDRHMPSARYHTNPPPPPTSVQRQQPRRDYRNQEEYDDSESESESETGSEEEYEPEYPPQRPRMIMAPPDSQSQRGASKRRPSLRHANTMPAPPAPEPRRPQTVIVPERHDPRVRHRRDSRADRRASVSRPPLIPPVKSHSAYDSPQARIIVEGSRSSRRESLQAYDGTFQEHRTRQQKYNEPRRPDRSSRVYENVAVGHDYERDFDDDEEEDEPVARAPLRRHETGTESRRRHQRPVEVRQAADAEDYISAKRGDRETYADQTYEMAKKRSSRTSGGPSEAESSRSKGSDNGGEIRLRIGNDAPVTLSLNGDMEGRTLQLVPIENGMNELVISGNARGGESTYRSERGSTRGDRRAIMPASQPRREAEEMTERSSQSSRRKRESRVDPSEPRRLLQRQPRRTERREPEYRY
>Arab_Me14_ctg01_-_Arab_Me14_ctg01g197t1
MLNVQIQVSSALRAMLVTGIILAPAVMATPAVQDLVDLRVVINAAANTIGDLNNPNRGWGLFGDSSQMGTANLINNVTSTILQSKFQIDTNKTAWLDSMNVTNATDPSVNTTLPSAWTPTLPLSSSMALPSTLPTSTPTLENTTTDLSTPYTDYVSSIPNLSTSLTSLGRAWHREMNSPVSEAIGVLQESITTLQTTMLQNELIDSSAILRTIRASGSLESAQQAWSRFLNLPGRAGGSDLSEDDTLAPGKRSVQRLAPANGKQYTHKELWGRKELSKIGEPNQDDAIVEWEAKAEDLKRGTAQPFSA
>Arab_Me14_ctg01_-_Arab_Me14_ctg01g198t1
MSSMAVEAKSLSSLTALASNPPAYPRNPTHVKHEPLILYIARVPGSKDVFLSPMKPREKVVTAEDIQSSLYFVHVEHPQDVNLIGLPDYEYSNSSETRPNAANRLSTPVIQRKAVANTPTAAPSRKPVPGTLTPIPNFESRQNVSAGHYAQRPGMLTPGYEPRRSYDSSRSETENDTSTFQPRPDVNTCPTGISLTLIRRDPASGAQWNVARIDDPTITEVSSAGLAESATRRKPGAPLYIAISNPGYSKFLHSDYEQRPSLPARASDLSIRSHQTSNAPPRSSMDHHLETSSKDDNVFRRRLWMEGLQHGGGFGHRKNGSHDYNSSRPTSRSNYDDRSSADQPLPSPSFLTREDQAYGTLQVSERQSSFRGYVFTSPWNGRCEFITGASGGSLKCRHIIPGLQGGPPAAATVSEMRFNLPSANKAPSPKEESSKRSSFFKRGRHSRNNSSVSVNRDDNVDDARSSLDRMDLSLGQEFAGGGFGGKQAKLGKIILEDEGLKMMDLLVATNIGLWWRAYEKAQAAARGD
>Arab_Me14_ctg01_-_Arab_Me14_ctg01g199t1
MPDDLESRLKSHARAFEGLMSLIPAKEYYGKDESITSTQWQKKKKQTTEERQAAKRAKLDPASHKTAQDVLDENARKRKRELEGEAEDDAVSEAPSSDLDMDIVKETPLEGIKKAKKQKTKKDAEAEPAEVVREGRTLTKAEIKAEKKKEKKKEKQTQKKNKEEARKASQAEFKEGLTAPKETKKPKEVDVDEEEDDESDGLEDSEDRVEALDVSGLVDAEEGQSTAPTSTANSNTSTAASDASSSTSPEEAPSKNAKKEKKPLQIDEKSQEEFRTRLNAKLEAMRAARKADGPDGRPAKNRAELIEARRKKEAARQAAKKAGRQEAKEDEARQKAEEQLARIRGGSGSPSIFPARSPEHERSFNFGKVAWEDGQELEGGLSKFLESRKKKGKSDTKTALEAAQKKQARINSYDEEKRKDIQEKDLWLNAKKRAQGEKVFDDVNLLKKSLKRQQKQKDKSKQEWKERLTNVTEGKEKRQKKREENLKARRDSKGVKGKKKGAPKKGGKKPAKRPGFEGTFKGK
>Arab_Me14_ctg01_-_Arab_Me14_ctg01g200t1
MASTKPLTMLARGPSATALLRHSQFSPRFASPATVALFSTTFARAATPAGPPPPGFRLPPQKKWDEGESALDKAGKYFLLMEMFRGMYVSLEQFFRPPFTIYYPFEKGPVSPRFRGEHALRRYPTGEERCIACKLCEAICPAQAITIEAEERMDGSRRTTRYDIDMTKCIYCGLCQESCPVDAIVEGPNTEYATETREELLYNKEKLLANGDKWEPEIAAAARADAPYR
>Arab_Me14_ctg01_-_Arab_Me14_ctg01g201t1
MFRTALLRSARSAVRAAPRCQASIARPARAFVQPKQITPAAYFQAVRSYASSAGLSQEEVVGRIMDLLKNFDKVQDASKLNGESHFHNDLGLDSLDTVEVVMAIEEEFSIEIPDKQADAIHSVKQAVEYILAQPDAH
>Arab_Me14_ctg01_-_Arab_Me14_ctg01g202t1
MASTSGVVRRRGAGAATGSAEDEGARVASPAPRNDRDRAPETSYEDSENGHKIAFDPRDISENAERSKQPKLTLMEEIILMGLKDKQGYLSFWNDNISYALRGCIVIELAFRGRISMQKDSSRRRFPLADRVIEVIDDTLTGEVLLDEALKMMKSSEKMSVNSWIDLMSGETWNLMKIGYQLKQVRERLCKGLVDKGILRTEKKNFLLFDMATHPVAEGAAKDEIRRRVRNLLTNRTVVLPGSQFLPEELEFRTLRTVAMVCAAYAANVLENALTTLGHEARERAFAQVDELLAEYSQWPFARRAGGGQGVGANLGQLINDEINSGKDKELQIEVVAACLSVFTRLDSLL
>Arab_Me14_ctg01_-_Arab_Me14_ctg01g203t1
MPSPTGADAHAHTHAHAPTPQDSSHSQNGASLQNGAVQQPTNASSAASSFDAPGDNNAIRDGKQKAKAVLAASGLNMESPTADAANGASRKRSHSGSRKPSAAAHELTDGQKTRQTALLNRYIARDLLDSVNKYERSKYSEQVYGELNDLRDFYREEVFPVRRQHPGAIFGYGYGGYGNGITDTQTNPRDPRSQLPQLLYPNQAKRAGRRAAPQLKVDREKGTQQAEQVEELVPVRLDIELDRLKLRDTFTWNLHDRVTDPLLVARTLVEDFQIPPELHQSVIHQVDREIREQIQDYYPHAFFDDEPLDPQQSYSAYKNDEMRILIKLNITIGQHTLVDQFEWEINNVLNSPEAFARQMAADLSLSGEFITAIAHSIREQCQMFTKSLYITGHPFDGRPVEDVDIHDNFLASPLPSVFRPMQSTKDFQPYLYELSHAELERAELSIMREQRRQKRSVNRRGGPALPDLKDRQRTVRTLVVSSVLPGAAETLEESHLFKATRKAREGRRRGVEDDSDDSDSDDSVMESPAPAQITGGTARTRGMRGAAVSAQAAMRSAIGRSATPEIAQLQQETREAARTTRSLRYEAREESVPEPITLIVKLRISSAKLREWQKNPRAFAKPASTPMMAPTSLPARGTPGANSMPPPPSPAMATSSKPSEASPRPPSTPTPKPQPKQWQYKPDGSLEAPWPAPAQSQTPPSPPWLQQALQDLRDRNPDHKFESTMRYVVMNEAHENRETGKIESKAVKLDGLFPSDPLPPNHKSYYLPRIRCQDCPGKLYNAGPGQTVTNFELHLKNRQHMSNVSSRIGRPVS
>Arab_Me14_ctg01_-_Arab_Me14_ctg01g204t1
MAEAQVVDYTLANPDTLTKYKVAADISQKVLKEVSGWISEGASIVELCERGDKLLEEEVGKVYRGKKIPKGVGHCTTISPSSYVTPYTPLKSDAEESGATLKAGEVVKIQLGAQIDGFAAIVCDNVVVGASGEITGAEADLLLGTYYANELLLRLMVPPGLVAHGDEEEQKKNAARKPYTQGQMTQMLEKVAKAYGCNVVESTTIWQFEHNEIESKKKIILSPGEGVRGEGLPEVGEVWGVEVGLSLGSGKIKNNGQRTTLHRRTANTFGLKRPTSRQLLSEVVKRFGTFPFSLRQIEDEKVAKVGVVECVRGGVLRQYEVVVEKDSKPVARLFSTVAVTKNGLQRLAQPPALDLEKVKSDKKIEDEEILKILEQPIGKTSIKKNKKKKKKPAKKAAAGETAAAEEESDDE
>Arab_Me14_ctg01_-_Arab_Me14_ctg01g205t1
MPLRKSARGPRSSTTPYASPTGTPSDSAKEKHQRSIIEWTEPAIQNPTPSFEEHGFARHGVLEQMGALGMPPSSKVKQRTRAMGGDTAARKSLAGKGNICSDEVGSTPEVTPAPELEPDDSERQEEEELPLELLPQDEDEDDDYVPSKTKKKMPASKTPVRGKTPVQGKTPVQAGTPVKADTPKAASTPTSPAVQTVEKPRDSETTQRAKIALLAAAESAHRNRKPRLGEALKQLMRMSSSDPSIAYVVDAVVHQHQTTEQWSTFRENIKALKKSVKCEAKKKRKHDQRNGSLVDSPRISQQPSPRPSSEVAPNDSVSFDHDNEEGTHVMRSTDCTMEDAYPAAASTAQALPSPHPLSTAPALSAVEPSVETAPQMPSKSPRKKHVSNDYLAPGSEMDVDGGASSAAPTPTGNTPDAGDGSDSELSDVNEEIVQKGPPTPAQSKEKFSTPAPAAAVKKGKNAAVARAGKKHANKGKLFGKHAHKQQPATAEQIEDLEQVYQMRKEMADAQPLRQFELPFPQSDVRFDDEILETESLTESMIAVGPPVDSDQPRRAGRMPHGAKRLREDMSRFSSPQLESAAVSRPSTPAVQPAIKRLKLNNGQAARTKRSPVKNRDGGPIAGVAFNGGGGSRQLGPDDNDPNSPQSESDDLCSACRGTGEFVCCEGCPRVFHLLCCDPPRVQVPEGSFYCYECTARLSAPDDTAIETYPSLGLLFKALERTNPRAFALPQEVQNHFEDVSARGDGSYFEEMKKFPLAKSSGYGYQRPDYTKVLDGDKPILCVQCGVSSGNKRQMLKCDFCNAYWHLDCVDPPLANPPHISLEASQRDAWRCPRHIEHDLRSGLLMQNDLNGAYDDAEMSDATFTRVPRKIRRRKNPEIVEPTFSRGMRNNGLIDIVNDPDDDTDGEGNYTGFEVKDVNSKVYRVPERGLIVDFLSKVKSRKVARNHAVQNNAYIAAQRKASMQNFMTHSFQQQQAALNLTRLAKKEQDIGLSEGTIDSLVLTLTAEAPEEVVASMDNSALPPVAADERAQLLKLQELIQRRLNAS
>Arab_Me14_ctg01_-_Arab_Me14_ctg01g206t1
MTPNTIISRDSNAIDTLTHSTYPIAATMADATYYIDEDVGHDSPEQTGDESLPYKSLGYAIYQKGEAAKFKTRKSVTGELAAGADPSSRMEWKDAAKSALKKAVNYAKTLKKKAEKEGEQLALRAKEQAARNEVLEEAKKVVLDEDRSLPAPIKIKLDDTDASKITLGDGKDVKGTRVRVFGRVHRERKQSKVLFITLRDGYGYMQVVLTGKLAETYDALTLTRETSMEILGELRQVPAGAHAPNDRELHADFYRVPSIWKAAGGDDAITNRVSKDTEHATLLDLRHLTLRGETASKVMIVRDAVEFAFNQVYKELRLRKVSPPALVQTQVEGGATLFKFGYYNEEAYLTQSSQLYLETCLPSMGDVYCIEKSFRAEKSLTRRHLAEYTHIEAELDYINFDDLLTHLEEVMCRVLEVATSDPVIKQHIMDLNPEFQMPERPFKRMKYQDAIDWLVEHNIENEDGEPHKFGDDIAEAAERRMTDIINKPIFLTHFPAEIKAFYMLKDSEDPRVTESVDCLMPGVGEIVGGSMRMDDNDELMAAFAREGIDPSAYYWYTDQRK
>Arab_Me14_ctg01_-_Arab_Me14_ctg01g207t1
MADPTLYTFPSPLEGYQNLEPLPQHKAADGKSYVNPPAEKKSEAYTSFVSPITNSKRGGFEYGYHSMSKAEELKFATELWERIRREFPELRIYQIWDRPLGPHPMGMFEVNIFTPEQFGAFIPWLVINRGPLSALVHPNTDQEERDHTQRATWMGQPLPLNLRLFKKMSKA
>Arab_Me14_ctg01_-_Arab_Me14_ctg01g208t1
MGREHLTNDEFFTQLGNLFEHNRKKGHGSVYLTQKRLTVDSTSTPPTPTKVADDPLWDTHPENPLPVLVRASNNRSDKKAGTDRQDVAKIVLSTIVKPDDIDTFYIRYAEACKTGMSSLKKRDRKKGKKDKKKKKGAETK
>Arab_Me14_ctg01_-_Arab_Me14_ctg01g209t1
MRQQYGGPKLPADLRNQFGDPANRGKSSGGRNGQVNRKDRRKAERDQKKSQKTRLKKAPPSSASHVQNGKRQQAVQEEESEVDWEDSEDEPTSVKKEAAPKSILKRKVQPDKDDSPVPAKVSRAVQDRLDQDDKEIRALEKKLGKKKKSAGGGGDDGLDDLFGDLGDFSDEDTLENPNAKRKRTEDDDWLASKRRKALGTAAPSAPEPDSEDEEDDLENPFSEDDDLDSEDMDGEDDEDLEEGDLDDGMDDEEDDEEDDIENPFSEDELSDDEEPAPRVRENPYVAPVAANAAPTTKYVPPALRGPPSSDAEALSRLKRQVQGLINRLSEANILTILKDIEKIYANNPRGYVNTTLINLLIDMLSDPSALLESFIILHAGFIAAVYKVIGPDFGAQIVERIVSEFDQHYQPNKDGAGKHTTNLMSVVSELYTFQVIGSNIVFDYVRFFLNELSEINTELLLRIVRAAGPQLRQDDPTALKDIVVLLQKSVANVGQQNLPVRTKFMIETINDLKNNKMKTGIAGASITRERTTQMKKQLGTLNSRNLKATEPLRVGLKDIRDTDKVGKWWLVGASWRNQAQSDVPAEEEKEPGRKRVEIDEFDEDGEVDLAQLAREQRMNTDVRRAIYVSIMSATDFKDAQIRLNKLNLKKAQEVEIPKVIIHCAGTEKTYNPYYTILARKVCSDHKTRKSFQFALWDIFKSLGENQDGGADSDDEGDDSKDVSLRKLVNQGKLYGTLMAKRVLSVTCLKNLNFPYLQAKTRTFVEIMLVTAILETQKGAKGERQETALLQTFVEADQAPEMVAGLQFFLKTVVSKTDIVDKSEKETVKWGCKAVIRVLNRVLATTTLEED
>Arab_Me14_ctg01_-_Arab_Me14_ctg01g210t1
MFRSLAPRAVQRATRPVSNSTFCASNIYFQNRLRRGYASEAEEKDLVIIGGGVAGYVAAIKAGQAGLKVACVEKRGSLGGTCLNVGCIPSKSLLNNSHLYHQILHDTKGRGIEVGDVKLNLPAMMKAKDTSVASLTKGIEFLFKKNNVEYIKGTGAFQDEHTVAVNLVEGGETTVRGKNILIATGSEATPFPGLTIDEQRVITSTGAIALQEVPKKMVVIGGGIIGLEMASVWSRLGSDVTVVEFLGQIGGPGMDQEIAKSTQKILKKQGLNFKLNTKVIAGEVSEQGIKVNVEAAKGGKAESLDADVVLVAIGRRPYTAGLGLDNISLETDDRGRLIIDQEYRTKIQHIRAIGDCTFGPMLAHKAEEEAVAAIEYITKGHGHVNYGAIPSVMYTHPEVAWVGQNEQELKEAGVKYNVGNFPFSANSRAKTNIDTDGMVKFLADAQTDRILGIHIIGPNAGEMIAEGTLALEYGASSEDVARTCHAHPTLAEAFKEAAMATYDKAVHY
>Arab_Me14_ctg01_-_Arab_Me14_ctg01g211t1
MSTAELDQRCNGLRNDLKAWEKQFAAQHNGKRAGREDIKADAVISQKYKEYNRLRTQPPTKAAPQTPSKRTASRKHISEVERTPIAPPRAPVLTPLKRKREEEIAEEEADAASERLSPQGPAFIGPTPQRDGIVLGLFDNLAAETPSKRRIIFGEIEPNIFQTPTKNLEVASEASLESRARGDRTPLSVSKRNLFNQFITPKKRKLDEEGTPSSALKGLATPAFLRRDNALDRIEEADETTPRPAPWKRRVLGRSLSAMIQAMRKDEDDRLDEEADIMRELEMEEEGIPAPARQRASQMLVEDSQVAMPLGPDRGLESGEDEEDEEELGRDGKPRKPWKKKGLKRQTRRVIMRPNAVKPKPVPQFQHDDRDSDAEPTSVPETQAQANDDPAISEEDNSDYASDVSHSAKKRKAPAEKADKLPEKKEGVVEKVKRKISATAHANYQRLKIKGKGGNGGKPRGRFGKR
>Arab_Me14_ctg01_-_Arab_Me14_ctg01g212t1
MADKELQSALQQLHQTLKSRNYQQATTLLSKAKMALLQLNALIPQENTTKKQLQAARETLELGAIISIRLKDTVSFTRYFQQLQPFYALPASTLPKDGSQASKVTGLYLLLLLSEGDYAGFHTLLETLEVAAAQEGKGLEDDQFIQYPIRLEQALMEGSYDRVWGDTKSERVPSEEFGMFSEILIGTIRKEIASCSERAYPSIPISDAKSLLFLDSEGSVVNFARESGWVVKDGRIYFPQQEDDYQSKDILVTSDQVIENTLGYARELEMIV
>Arab_Me14_ctg01_-_Arab_Me14_ctg01g213t1
MKPEALDAFATQSIRPGTLEAAAASPGETGRSMTEASVTQQEKVHLPEQRRPPLNRLNTPLGQRIDGTEAAAKVVEEAAQVVEGVVQGVKAAIHEAVLWAEKKAEVLAHSEDHAGPYDSPATCAGGVSDLDVMATGVLPATIPVQEDGKDRELDGGHKSGGRDSRL
>Arab_Me14_ctg01_-_Arab_Me14_ctg01g214t1
MASSNHPLLLAATVAHGLLALGHMSKGLEQFKHASINALPTTLRGAVKAGWYEGGGFLLIMAILNYKWAQTGLLDVYDKSIAGLLVAILAGAAASYFQSGDKPTATALSVVAILQGLGAKGASP
>Arab_Me14_ctg01_-_Arab_Me14_ctg01g215t1
MASAAPIQNRPYRSHKVPACTRCRSRKIRCHIDIPGEPCLSCRERRLKCQYVESSTSSPTEENGDRKPAKRRRVSNAEMAEGPMRPQSAPVLHKATTNPSASIIMASHLAEDLDIFNRHLAKHRKPGGEASETSNYQTLNHDAEDPIVYLTVPRFRTGLPPGSGCGRSQLEILEQIMGPFKREVIELYFKNLHYHFPVLDEEMCALLRNGQLGKVPNNLLCVIYATGSPLWPRSETLKMHPKPDAHFVWNKAISATLEDFLSPGMSTISTAILDQIGRPSVSIVGNITLCGKTVSLAQTFGLHRDPSQWRITENERSVRIRLWWCVLITDTWASVAYGAPPHITKGYYDVPRPTVSSLVSHKATQQQKQATVCFVHFCALTELVGLILPLIYQIEPDRMQLSQQVAHFKRELNSLEAQLPTWLPLPNQPGSSNLWFCFLSTRLLLARVTLRSAVLEGDSSLGRDRIHQLRAASSAVLDFLLSLGELQFQDFWLPYVTHLLVHAITVSLRCTVETQDPETRNASVTRLQRVIAHIQFARDNYDWDIAIYCLERCAEPVSRIASLNFREPAPPSETELTSVAPNPNGYGSGVEVPPVQTFDDANFLLSDILDPNAFDFSWEALWDTPSGMTNFAI
>Arab_Me14_ctg01_-_Arab_Me14_ctg01g216t1
MTIPDEVDIIVCGGGSCGCVVAGRLANLDHNLQVLLIEAGESNLNNPWVFRPGIYPRNMKLDSKTASFYYSRPSEWLDGRRAVVPCAHILGGGSSINFMMYTRASASDYDDFQAKGWTTKELIPLMKKHETYQRSCGNRDLHGFEGPIKVSFGNYTYPIKDDFLRATESQGIPFTDDLQDLTTAHGAEHWLKWINRDTGRRSDSAHGYIHSTRAVHQNLHLMTNNKVEKVVLEGDRAVGVKVVPTKPLSPGQLTSRVIKARKQIIVSGGTLSSPLILQRSGIGDPEKLRKAGVKPLVDLPGVGLNFQDHYLTFSAFRAKPGVESFDDFVRGDPAVQKQVFDQWNLNGTGPLATNGIEAGVKIRPTEEELTMMDKWPCPEFRSGWDSYFKDKPDKPVMHYSVIAGWFGDHMVMPHGNFFSMFHFLEYPFSRGSTHITSPNPYDAPDFDAGFMNDKRDMAPMVWGYIKSRETARRMDAYAGEVQSMHPFYAFDSPARALDMDLSTTNAYALPGNLTAGIQHGSWTMPLDIKKGKAPSPNFLNSNSQHVLEDLHYTNEDIEHIVTWVKRHVETTWHSLGTCSMAPKNGNSIVKHGVLDERLNVHGVKGLKVADLSICPDNVGCNTYSTALLIGEKCAVLTAEDLGYSGAALDMKVPTYHAPREIVGLSRL
>Arab_Me14_ctg01_-_Arab_Me14_ctg01g217t1
MITTRLAIRGSVASRRATAQLLKSLNTSSVRPAFMVVQHIQAPAYQRQFSSSESPKIQKFFEKKETEMVRRTPAAWPHPEFSENQMDGVQIAHREPQTASDKAALLATRVLRWGLDKATGYKHKEGAMTEEKYMIRNVFLESVAGVPGMVAGMLRHLNSMRRMKRDNGWIETLLEESYNERMHLLTFLKLSKPGPFMRLMVLGAQGVWCNALFFAYLISPRTVHRFVGYLEEEAVFTYTRQLQDLDAGRLPKWEKLMAPDIAIDYWKMPEGHRTMRDLLLYIRADESKHREVNHTLGNLNQKEDPNPYASEYKDLSKPHPSKDLAHQKPTGWERHEVI
>Arab_Me14_ctg01_-_Arab_Me14_ctg01g218t1
MSDKRISFKVDGEVQGVNFRSFTQKQAKSIGVTGFVSNASDGTVQGEAQGSEDKIKEFIQHLNKGPSAASVSGVEHNDISSKSGESGFNVQ
>Arab_Me14_ctg01_-_Arab_Me14_ctg01g219t1
MDSMPTPPPERGSSPEPWATPALALNAVPQLDRSVSTASSVSSHSGRSVSSRLSESGIPGKRRGYMRPEGTQFSDSAKNRESVMNLGTIAHLQYYFARTGLLDTATGRVAKSRKPGSRSPGGTEAEVDMSILSPVSPSLAAYDFGDSLVESPQDETASMDWEGGEPMMLPPTVSTYKQNPVYVPPPPDMTVLRRELRESLDEASKHLQELEKRFTGDDPLESGGSGPRSADAAGWHEIQGLNLLDVTTLAIRAAKNYYTAHEEPQRLYAIKTERDIRKELYEVLEVLKRLAIRNFANGVQPYEVAQIRQWIASISDLLDAEEEKERLEHAQRESWAWREGDWSGRERERELLFLKSFDNTTDSLPDWTEPTESEPQTPFLLALQNGLRLVHLHNSLVRKSRRHFEEIKQYHTDTAKPYRCADNLRYWAKAAELRWDIKLDVDVLGVVQGKDAAVWKKFDAAVLQWCQGVREEITCEWLKQKNQIRAPTLHIRNPSCEGL
>Arab_Me14_ctg01_-_Arab_Me14_ctg01g220t1
MTQNSFRGPAAAAAPAAAAENDSMSSLRTPHLVDSPASSEVAATPPDQPAPASSSTASSSPRTQLRRTASLNNSSSSILDSTTKLARNVSPALLARMKFLNQASSTDSPSKNAPSPGAIGRIAEHKIKQLDDFHSTKRTFSIERRGTAWSSGTGSQLGTPLIPQLTGESVPALVMERDLESDISSVISTSDRVLPSESEAETDDVLDMQKYRLPDITKTKSLSQTIAESDTTPVADLTRPPTPPPKDTPPLRIEDEVSVLDNHNDMDVASHFARRHLHRTNSIYTLSKASFSNQIQQLTSMKLPPTTIASEITALPSSTLAGRALHSSANDIRLWMAKATEVLNGLDADDDVEWAAAAGREGLADVDAAIGKFEGLITVYITAIEDLQSRPDIALLPLKDQTTLVTQMEEIVGNWTEIKRTLKGIKNQVEIAMEWEELWNSVLGEIGAEVETLSRLVFEMEERRHRVISDSVAESAEKFDIADLETIVETPRQNKMHNNRLSMPPTLTVMSPISPIPQIEQESSRLLEIFAKLQPLRASLDFLPMRLASFEMRASTMFPSACDELMRRKEQLEKQEKTLEAEADALREELGEDKWVHSFRQAGSKAVAMYDSCMKSIERLQQAIDDGDDEKLGSRISTYKDKRDHYPPSIKRVLELIDIEMKHRSTVNGEILRIQQDVRQKMSDLEGGIQQMDAILDDVSASRKLRDSVSTVLSARTEASSAIDTPGSSPASSVVMSRKGSDYSSMTPAGRKSRQSSTSTTKSSLPPNRRYSSLPVIPGSTTRKSLPATYLEPTISRAMACTPTRTAHSSTPAIERPSTKPRWNTSTNMRDTVVGHHHKPLPATPLRSLSGQSSIPVRSPLGRSSMLSPPPVHSATATPAKSSLKRPVASTLQSPSTPLKSPTFVHSSFSTRSPASGRRVTIAEDDSSPPIEDSPISRRATRPASAMNSRRTSLLPTPKPRTTSASTLTPASTPARATSRLDNTEEGRKSKAGDGRSSRVSSRQSSLGVTGRQSSLGISGRQSSAGDRPVWR
>Arab_Me14_ctg01_-_Arab_Me14_ctg01g221t1
MSSIYFGFPQCYDSQPVSSVMQKATAFDQIQHMLANLAISNYGEPNIYNPHTDTLHEANSKPAYERSPCAPTKSFPHPSTSGYTELDTTINTTTHHRLPTPATPVPSHAPWTRDLKELADPLTYEELSHLAHLKTARHESAFTLMQARREVEIETEKLNRLDAEVSAMQCGRRC
>Arab_Me14_ctg01_-_Arab_Me14_ctg01g222t1
MGNHSSKPSCSTASNQYALRTQPRLCMWIMPLTHFDYHVHRNCDRFSRTAEYFPKHHTFIRELQKVLKREGVQPRELEFLKSFPENNSTIRCLAFFDKQPTPEDCCIILEHCPVGDLHTFYWNRAASINNGAFSEAFMWSIFSQLANAAAFLHEGIGCKNAGDANLWRPIIHRDIKLKNILVRSLGSNDDFSEITIKLSDFGVAAYYDPKAASDLNFAGIPAYGRQKLPGTRESALQQAISGPLKQCKEKWLEENAGKKPYHGDLSRADQAFWWAREAAPEAIPTNLAIDDQVKDDPQVFKRAEQLSWNGAEDESR
>Arab_Me14_ctg01_-_Arab_Me14_ctg01g223t1
MTSLKRSRSDPPPPITIEDTASGEPPQPSPSPTAERARTFDVRPTYQHEESQSTAQQRRNSTFGHRRKHSPNLQWHEEWTDESWKHGRVLLVDYVGKEHAPEGKRKVVSKEFCDVDSLRRFYRKKSVSDQAALRVIHVQNAPWATRFLLGKFNIDGSHDLVGTTFGKWAQYERPLVRNNKPVPNGRTFRAQRDPWRGISRASFSCDYLKHFPRGKIQKPKKGTKMMELNGYDADDQPCYAYDALVQRLSVYVQLSNGTPGSATDPDIPNPYNEEEFEDYQRLKKSYGDVNANEHREKYIPKLNTLDNGSTIIVFESSQSGDVKDTLIGARQEIESRWRRLTFYLSREETSSDEALTVECMDYILKDIFKALAYNWDRFLATCEAHVGILEDKIYENPADESRDQELWSNSALWLKVERLIWKHLDMVKDMRTYLHELASGDPKEDEEWLGNTPTELERLTKQWERDIIAPTTALADLMYKSVGIRDARHSLQLGLSMWRLSWITFIFLPLTFVCGFFGMNVDTFESNPSIKWFFISAVPVLFTVLVLWYGVKHSLSTQRQNPLRRGVYESLYYDLAVNYPHLWTRRGPRSGLTFVGTWGLIKWRLVTRWFGGDKLQRKGDYDPAVDEFGTWSRIKRYLVRRWLPELRIVVADTLPKNQAPGEERLDSIASFSKDLGAIAELMSIATPVALAEIEPTAASRLQRRIPAERLKSLSPTRSDRSGSGRPSSEGGASEVMIDERGASEDERSGDEERDWEMERARQRRMRLNVPFENGRLT
>Arab_Me14_ctg01_-_Arab_Me14_ctg01g224t1
MFIRIAQLALLLCFALLVLGAEDYYKLLGLKKDASERELKKAYRSLSKKFHPDKNPGDESANQKFVAVAEAYDILSVEETRKIYDQYGHDGIEQHKKGNGPGQRHDPFDLFSRFFGGSGHFGHHGGERRGPSMEVRVAIPLRDFYNGRKTEFTIEKQAICSACEGSGSADGHVETCDTCGGRGAVIRRQQLAPGLFQQVQMQCDACNGKGKTIKNPCPICHGSRVVRESETHELDIEKGMPDGVRITYENEADESPDYVAGDLIVHLVEADAALGAQDHERTDGTFFRRRGPDLFWREVLSLREAWMGDWTRNVTHLDGHIVKLSRKRGEVVQPNTVEILKEEGMPVWHQQLENNDGLQYGNLHVEYVVVLPDQMEKGMEKDFWGVWDKYRKKSGVVLDKALNRPEGEIKMPDADGHDEL
>Arab_Me14_ctg01_-_Arab_Me14_ctg01g225t1
MATKATTVAPLVQQYITSQKVGVVVSAGKMSRAVKVRVAGQEWNKTFRKHFPSHKHYTVSDPNNSLVEGDVVRITSGHRTSSTIRHVVTAIVAPFGEPVENRPRVLNADELDTLRTQERLLKDVRAAERGREASVQRLAQAAKQGVRIPTLEEAVEKLRVHEETEKTRAANKGGKEAHRGQGGQTETKRERRKAEKVKSRAERHAAERAESAKKQVV
>Arab_Me14_ctg01_-_Arab_Me14_ctg01g226t1
MAKARVSLQRHAEQINVHEDGQNEEEVHSELGESMDPLDESGHTVDSSDEEIEDAVAEDMSRFEETFVGINKRFRLINRIGEGTFSTVYKAEDLEYNKFDNSWDIEERENKKWSSPGSRKRSKRPHYVAIKKIYVTSSPIRIFNELELLYDLRDSDSVCPLITAFRHLDQVVAVLPYFQHRDFRDYYRDMKISEMRLYFRSLFTALRAVHQKKIIHRDVKPTNFLYNPALQRGVLVDFGLAEREGTDWHPCACHLSDEDRRHRVTHSVYAQTQSSGHNTSSYPKNDTRNSRRANRAGTRGFRAPEVLLKCTQQTCSIDMWSVGVILLTMLSRRFPFFHSADDIDALLEITTIFGRKKMRETSLLHGQVFETNIPSYSESGHSLEKIILWCTGRTGDKTAPKKELEEDEKEAVQFLHRLLECNPAKRITADEALGHPFLAKAHDDNEGDDGMVDLVEA
>Arab_Me14_ctg01_-_Arab_Me14_ctg01g227t1
MEARVDFDINEAIKLFDSDPATIPAPEAPRALQECEDDPEALSSLALINSELNPVVDAVAESPDAITRSSVFDTLQFLLKCVPARPACASNKTTAHESDLTVQSRNSAQIPPAALGKILDLIVSALSTQADIVHADLEAEDQDAIPHHKTLLEMYAFLFRWTISAVETRALEKSASAPAARGRGKTGKSKAGSSKDGTWDAAAQLETALDRVSKVLKLKLGRIFVTTSERDTFVGLFTKPVYHILENEARVKNAAIRNHCFRVLCIAVKHHGHAYTAQTSINQCLTYFEHLSEPMAEFLHTLADAYDYSQLAEDVLKDISTKEYSATDLKGPKSVSTFLIKISELLPNLIIKQGALLNNLLDSEAYTLRCAMIEVCGNLINMLSKLSQDDRSEAHKRNIDIFFDVLEQRFLDINPYCRCRVMQVYVKLCDLPHMSSKQGRKRRQMAADFSEQSLRDKSSNVRRNAIKLLSKLVETHPFSAMYNGLLSTESWEQGLEGIDANIAALKPPEELQERAPGEVDESMLLDATQADAGTAKDPAEMNEEEQAALVVKLQKDAETVQELEKFNKARSFVRQALRFIEVINDAAEQVMQLLSSKNKSEVIEAMDFFTTIDAYKIANARLGIKRMLRLIWTKGNSDEGKGVQAHLIDCYKGLFFNAPPGCDTNQAANYITRGMISLTFDTTPAELISLEQLLSTMMKQGLVNSLVIEKLWAIYGYQKKDISMRQRRGAIIVLGMLALSSPDIIVQEMETCLRIGLGKFGHRDFGLARYTCVALRRISAPPGKQQAGEAQAPAVKLPNDHAVLVRLAAMCELESDSKDWFGVADQAISAIYVLSRHPDVLCSDIIRQVAKRVFSPKAPSRPTSSSGPKGDGSDPIDVDEEMPDAPALDAPQPKKQNSALALSQLVFIVGHVAIKQIVHLEICELEFKRRKAEKEKDKKAAPRKSLAPEPTPLKKGRKRGAAKDPTPAPEAEADDLDLMAGTNEDDFTDAIAHVRERELLFGPQSLLANFGPLVSDICANNTSYNHPTLQAQAALCLGKLMCVSQQYCEDNLNLLLNILERSQDAVVRSNLVIALGDMAVCFNHLVEQDTEFLYRRLNDSDPSVKRTCLQTLTFLILAGQVKVKGQLAEMAKCIEDSDKKITEMARQFFSELSTKDNAIYNQFVDMFSTLSADTALDEDAFKRIIKYLAGYIEKEKQAKQLSAKLASRLPRAENERQWRDIEYTLGFLQHKDEEIQKMLSEGFKVVQATA
>Arab_Me14_ctg01_-_Arab_Me14_ctg01g228t1
MGKRSISEVGDAELSRKKSKKDKSEKSKKSVAVDAVEANGDNVDASEAERKAAKKAKKEAKEAKKAKKVEPAPAVEEDEDAVKAARKAARKAEKKKAKEAASANTTAPTSVATSAVASRVESSVTSPEPPASGEYQEDKELSQLPQSEIDAFLTKHVVTIDDPKPGHKLRPIINFKYLPIKNEAFAKFTTPTPIQAAVWPSLFAGRDAIGVAETGSGKTLAFGVPCVRYIQSLPKNKRRGVKAVIVSPTRELAVQIHDQLVTLAGPAGLGVVCVYGGVPKPPQIEACRTASIVVATPGRLNDLIGEGSCDLSSTEYVVLDEADRMLDKGFEEPIRQIITQCPKKRQTLMFTATWPPSVRELASTFMVSPVKITIGDNVSGELRANIRIKQEVEVVDPRAKEQRLLQLLRQYQSGKNKDDRILVFCLYKKEAMRIEQFIQRSGFRVGGIHGDLSQDKRTASLAAFKEGKVPLLVATDVAARGLDIPAVKVVINVTFPLTAEDYVHRIGRTGRAGQDGLAITLFTEHDKGLSGSLINVLKAANQPVPEELMKFGTTVKKKGHEAYGAFYKDTGDMKAATKITFD
>Arab_Me14_ctg01_-_Arab_Me14_ctg01g229t1
MADVTELRCWPSCVDALDWSQDNIIALASDERVELLFPNTVSYERDNEVPQWQHVPLQVPWFSNDELPVKDTAPLPNYSIGEEISPSVPTAIAWSPSGLAKHRRCALAVLTSNLVLSIWSAEGKLQAESSWNRRLLLNDALADFFSNSVTAQTSRVASDAEEQTRLRTRIRAFTWAPALPSASNTMGTQTSYGQEYLVIANDDNQLLFLGVDSPTSTLGLSQSWKATVLTHMSLELEEDCIFTGPLFFDDLMKQQRFISHVAWSPWLMQHDCYHSVVVYATNEEVRGRLVVHSNDRITLGAEVVYSGTSLRHSGPISWCPRIDEDGKLTLALFTNSGLVYLTISGNDASIVDEISHDLDGRWDQVSGAVWDYEKLPSPRLHFSSLLSTVQSPTAVLEKSSGALASVKAPNWKEKIENNLVLFSVKNDLKGHSKTKVWGLTPSPLGDFIAVCNSLHPSDSIEYGPPADRRGTVALSTLRQYSKIRESFPLRNTTAEGILFSLKKLVENTVEDADQIPAFAEEAVDKLVQAYGPIAVSEDVASTTIGTSDLKELVKIFKTITLFDENTLRDRYSVLVSYACNDISSNELPRSLISYRLATALQRLPSTLSQTSFSAEILLQHKQLVVLINDLLFSDGVAKAATEAADGQRGLVETEEVAEELASGTDGGAMDTDTTPENTAPSSHDQAIGTNGLGLDSAVAVSDYCDFCSAPIPFADLTIATCMNGHQFPRCGISLLAIQAPGITKYCGICSTPFLSEEFVQAQEVQEEMPEPPVTLSRVLFQACDVCIYCGGKFIG
>Arab_Me14_ctg01_-_Arab_Me14_ctg01g230t1
MYEDNGLVGTHHPPSRQRLITVHRPAWKQKAQYIEVGGVRGKVEHALAEARQDHVRSGLRRRKRSPTTPRAKSVKMGIDLDRHHVRDGHRKVPKSTNPYVKLLVRLYKFLARRTDAPFNKVVLRRLMMSKINRPPVSLSKIIATAANKANAKTNEGKTVVVVGTVTDDNRLLDLPKLSVAAMRFTASARARIEKAGGEVLTIDEVATRFPTGANTLLLRGPKNARESVKHFGFGPHSNKKPYVESKGRKFERARGRRRSRGFKV
>Arab_Me14_ctg01_-_Arab_Me14_ctg01g231t1
MADKRKVGVLGGGQLGRMLIEAANRLNIQVNVLDVNNSPAKQISAHDGHIEGSFKDAAKVKELAQKCDVVTVEIEHVDTQMLEEVVGQVVVEPSWKTLRIIKDKYAQKQHIKEHGVDVAESIDLEGKGAEGLKEVGAKYGYPYMLKSKTEAYDGKGNFVVKSEDGIDAAIKALGGRPLYAEKWADFSMELAVMVVKTKDGVLTFPTVETVHEDSICKLTYTPPRNVAATTAQRAQDLAKKAIAAFEGKGVFGVEMFLLKDDSLLINEIAPRPHNSGHYTIEGCDMSQYEAHLRAILDIPISQEDLRLKEPSIMLNILGAQSPDSHEKTAQRAYTVPGAKVHLYGKGDARPGRKMGHITLTAPTLREAERKIQPLIDFVDEQKGKALGPRTEGPKEEPLVAVIMGSDSDLPVLKAGLQILEKLDIPFTTRITSAHRTPDWLRTFSKNASSTSVRVIIGAAGGAAHLPGMCASWTTLPVIGLPVKATHMDGWDSLVSMTQMPRGEPVATVGINNSTNAALLAVRILGASDEAVRERLRVWMEGNEKEVMRKDGDLLEKGWEQYLTSMSK
>Arab_Me14_ctg01_-_Arab_Me14_ctg01g232t1
MSQEEKVRSSVDAARDTALPVLPTINPDAPTPKPNAPASFHPAVYVATWITLSSSTIVFNKYILDTAKFQFPIFLTTWHLIFATIMTQILARFTTILDSRKKVPMTGKVYLRAIVPIGLFFSLSLICGNQAYLYLSVAFIQMLKATTPVAVLLATWSMGIAPVNLKVLGNVSFIVLGVVIASFGELQFVMIGFLFQVAGIVFEAVRLVMVERILSSKEFKMDPLVSLYYYAPACAVMNSIVLLFTELPTLTMNDINRVGGLTLFANAGVAFLLNVSVVFLIGKTSSLVLTLSGVLKDILLVLASMFLFRDPVTLLQAFGYSIALGGLVYYKLGGDKMKEALSAGSMKWAEFGQTRPALRKLMVFGAVVVSMFFILGSLGPRYAPDQTGKLYNGVQNGIGHVLGEKGA
>Arab_Me14_ctg01_-_Arab_Me14_ctg01g233t1
MGFAPSQIVMDEGKMGSSMALCPEMHQQPSNTATQSVNEYASSAGLQHIIMRRNVPWKKRLFGALCLAGPEMASNPPLCVYLPVLYRSQALQQQQHVLPGMDSVDSALANARMR
>Arab_Me14_ctg01_-_Arab_Me14_ctg01g234t1
MLNYARQTLKRVPSFQELLQGTMGSNKEEINVDVLVIGAGPTGLGAAKRLHQIDGPSWLIVDSNETPGGLASTDTTPEGFLYDVGGHVIFSHYKYFDDVIDEALPRDDDWFTHQRISYVRCKEQWVPYPFQNNLSMLNKDDQAKCVDGLIDAALEARVANTKPKDFDEWILRQMGVGIADLFMRPYNYKVWAVPTTKMQCAWLGERVAAPNVKGVINNIIHNKTAGNWGPNATFKFPAKDGTGGIWIAVANTLPKEKTSYGKNSTVTKVEADNKRVTLKDGRVVKYNKLINTMAVDALVDTMGDKELQTLSKDLFYSSTHVIGVGLRGERPERIGDKCWLYFPEDDCPFYRATIFSNYSPYNQPQKDVKLATQQLADGSKPESTEPQEGPYWSIMLEVSESSMKPVDQENMLKDCIQGLINTEMIKSDDEIVSTYHRRFDHGYPTPSLEREGVLTKLLPALQDKGIYSRGRFGSWRYEVGNQDHSFMLGVEAVDNIVNGAVELTLNYPDFVNGRKNEERRLQDGAQIFKKVGDNYLNKQE
>Arab_Me14_ctg01_-_Arab_Me14_ctg01g235t1
MSLTNGTPLDIAQSAREGSRALAVLKTEERNAALITIHKALADGKEEVLAANAKDLEAANKAAAGGTLSASLVKRLNLGGPGKYEDMLQGILDVVELEDPINKTTAKTLLDDNLTLSRITCPIGVLLIIFEARPEVIANISALAIKSGNAAILKGGRESSHSFAAIASIISKALSSTAVPSSCLQLVQTHDVIADLLKLDTYIDLCIPRGGNKLVRYVKDSTSIPVLGHADGICSIFLTNDYPAEKAVKIIVDAKCSYPAGCNSTEQLLVEESALNTTLPVVAEALLKKGVSLRCDPSSLSALQSKLDSHSSALLQAAGPEDFDTEFLDFIIAIKAVPSIAEAISHINAHGSHHTDVILTNSESTARSFLAAVDSASVYWNTSTRMADGQRYGFGTEVGISTNKIHSRGPVGLEGLCIYKWVIVGDAHVSSDYGAGGKKWKHQKMAVGDEESVAQNEEEKEVLRKFRANKGQ
>Arab_Me14_ctg01_-_Arab_Me14_ctg01g236t1
MRSTMRALAALASAASLFAPSIAQTYTNCNPTVRTDCPPDSALARTVNIDLSSASDSFTPQSNPTYGNDGVSFTISKSGDAPQLTSKWYIMFGKVDVVLKAAPGAGIVSSFVMQSDTLDEIDWEWLGADPDEVQTNFFGKGQTTSYNRGAFHADAGSQSGFKTYTIEWTPEQIVWQIDGVTVRTLEPANAENQYPQTPMQIKFGAWAGGDPANAAGTIEWARGPTDYSKGPFTMQVKSLKVADYSTGSTYSYGDTSGTWKSIKSNGGVIYSGGDRPVNSDSPQITATATGAPLPFSPSRTSSDYERPSVYPWIPGTSSATPEPTFGNYPGLPSGWTVSDSGKVLPPSSAPPSPLASSTASPAASQSASSGDSKPIVWTGYDDRGFTTIYTSYPGTTQAPVTQLPSTQAASQPQPQPTSSAKLSANAVLENNAAGTDLPVPKANDGTALVAIRGAFLAGIFSVTMSLMGYDW
>Arab_Me14_ctg01_-_Arab_Me14_ctg01g237t1
MFKLTLLTLLLTSTLSFTSATFPSHKIRGVNLGSLFIVEPWMSRRTWRDMGCGDAASEWDCVVALGQDKANTVFQKHWDTFITADDFDKMKEYGLNTVRIPVGHWFVEDTIAPGESWPRDGMKYLDNVVGIAASKNISVILDLHGAPGVQVPNSAFTGHTLPGAGFYSPPNYDRAHTFLRNMTERAHTHASYASTFMFQVLNEPEHNHDSLVTDYYPKAYQTIRDAEADLKTPSLDRLTVQMMDSSWGAGNPRRNLPKGATDLAFDIHRYLTYSSTPATKADYLRASCTDAFDSSDNDNDNDNDNDNNDNDNDNDNDNDNDKPLVIGEWSLAIKQDSEWSNEFSPTKEENHDWYRKWWAAQVQAYEKHKGWVMWSWKTELGGDWRWSYSGAVEAGIIPKNQFGKVKAMAKC
>Arab_Me14_ctg01_-_Arab_Me14_ctg01g238t1
MADYQEEDLFDDLYDDEPASKPTPAAAAPPPPPPPPAEPEPKTEPQSAPPQETTQDAAPSWPESAVGGNDTNMDASAYDNAQNDDDNYGPINVKEDGKMFIGGLNWETTEDSLKGYFTQFGEVSECTVMRDSATGRSRGFGFLTFKDPKCVNTVMVKEHYLDGKIIDPKRAIPREEQERTSKIFVGGVSQEATEEDFTNFFKQFGRVVDATLMMDKETGRPRGFGFVTFDGDAAVDATLKQPLQILGKPIEVKRAQPRGNMRDGEDDKKFGRNNKFGNRDGGNNGNSGYDNQNQQQQGGTAGMTPAMMAQYWQRMQQYFQQMQQQLAAGGGGMPNAMGMGGMNPMQMQQMQNMQQMMGGGMNRGNGSPNPQNMGGGMNPMQMQQMQQMQQMQQQQMMQQGGSFGGGSEQGMMGGGPRPAYTAQEQLAFEQQKYEQQQARRQQQSGGYGGQGGPTSWEGMYDDAPQPSIPSGPGGGRGGFKHQNNNRQRQGSSQPPTGPSAAPINAPTGPKNAGKPGANYRGGGRTNNFRHQPYGGGRG
>Arab_Me14_ctg01_-_Arab_Me14_ctg01g239t1
MKKQQQEMVPEMVQLDRSASHSPFWRTTSNTSNASTQSKKVIGASYSHADILSFGSLSVSGSTSRPRTPPSAGHSRDSSTAPRRTSSNVSPRAARDTYGSFLRQSNNDWGADDQDDGDIMFEDDEDEFGLPSIANARRKGRRKEPSKGREVAGTYAHTRNGLGSAGSTAWRSIDSGDIAEERGIPSYPTAKKREGKILRPQYQEILRDPANSMHLIEHPSLPPNATAKQIEEYSARTTRINKFKRILQASTISLSDLRDSAWSGVPSEVRAMTWQVLLGYLPTSSERRVATLERKRKEYLDGVRQAFEKGTAGSTGAVAAGITRASSFPSTIRGRGRGLDEAIWHQISIDVPRTNPHLELYSYEATQRSLERILYVWAIRHPASGYVQGINDLVTPFWQVFLGAYISDPDIEFGMDPGQLPKQVLDAVEADSFWCLTKLLDGIQDNYIAHQPGIQRQVASLRDLTTRIDDGLAKHLQNEGVEFIQFSFRWMNCLLMREISVKNTIRMWDTYLAEEDGFSSFHLYVCAAFLVKWSDQLRKMDFQEVMMFLQSLPTKQWTEKDIELLLSEAFIWQSLFKGSGAHLKNTSSRGVGMGPDF
>Arab_Me14_ctg01_-_Arab_Me14_ctg01g240t1
MEQPTRPPFEELPLDKEGPPGNAWGLYGFDDELGALNMITPATVKAAAQEIRTGERVSLDWNLNLPSHPSFGRPSFGWRMENRTHPDGAKRFVNDDHLDINTQSSSQWDGFRHYGYQQAARYYGGRTQQDIENTEIIGINKIAHSGGITARAVILDYPRYLQKQGKAAIDALSSHAIQAKELKDMLAQTGVQARNGDLLLVRTGFTEQYDKLSEQERKELASKPPTFAGVESTKETLRWIWESGFVAVAGKSLDQDETDDSSDAPSFEMAPLVGDHNKPGGIWKGEAWEDDMQGGGLLHQWLLGGWGVMIGEMWDLERLCEKAEELGRWTCFVSSVPLKVPSGVASPPNAVAIF
>Arab_Me14_ctg01_-_Arab_Me14_ctg01g241t1
MTTVPTFLSLPPEIRNRIYQYALTPATGLVYREDEATRKQKAFFCDSQIHCLSSTVSLDLNSLVELGQSKFHRPYRLRGVLGFVIIIQDTHQRSRNKRFLNDTSGTLLLLDKIRIQYPDLCVIYEPPCWRLDATAALYKACLFLGMLYSTVLRGNGIAPLLNPTGSFSITQLLDKDERDDPSWLKAVRVWRANHTMSLTATNFRFRPLNLDKNMSRSKGLVGLATAFDAESYRMKDAARAQIRQWVEIGL
>Arab_Me14_ctg01_-_Arab_Me14_ctg01g242t1
MSSMTKISLLALIGAAAAHPSYGGHYKFHSHSKPYPTGGWSGNYNSTQVPAGTASYSQDKTSTIDVTSTSTKTIYSTVYPTPTSAVVENVSSKATGQCGPATVTITSTEKATVTVTPGASSAYSASLVSSVVALPSKAGEYDASSYIVVSSTPAAEKPTTSSKPADVTSSKPVVTSSSKAQYEAYTPSASLPAVTSVAQTDYSTAVPTSSVAASSAAASSSAAPKPSGTPTYSGTKRGLAYNDGELCASFGSNFGFAYNWAQTESKDVGAPFIPMMHKISDSTAEAWLANVDKAVKAGSKAVMGFNEPDIVAQANLTPEAACSGWKEYMNPIASSHPDVTILGPSVSNSGNDGQGLSWLSTFHEVCPDAIVHATNIHFYDIYESATIDRFKAQVEKAAAMYGKPVWITEFGLNPGSASEEQAASFLKEAMDFCDSSPLIQGYAWFMVGTGENQLNSASGLSAVGQVYAGSS
>Arab_Me14_ctg01_-_Arab_Me14_ctg01g243t1
MIAGRGRQRIRPPRRGLHGDEIDFENTWATIEAAFREIHTKNASKLSYEELYRHAYRIVLKKKGGDLYQNVHNFERKWLGSEVRAGIQQLLSPNLLVGAQSLGGTTANERRVAGEKFLKGLKQAWGDHQVCMSMLADVLMYMDRVYCADHRRPSIFNAAMVLFRDEILRSPVSDHDARWLLGLLNHVILDQIQMERDGDVIDKHLIKSCVWMLEGLHEDETESEEQRLYNVSFEREYLDTSREFYKRESELLLRDSDAGAYCRHARRRIYEEDERCKQTLLESTGPKIQKVVEDELIKNRIHELVEMESGVRYMIDNDRLEELNVVYDLNRRVDEKKLELTQAIQKRIVDMGTDVNNDAIAASQAPAPVPAPAQAADPADKNKKVAQEKTINQQTVAAIKWVEDVLMLKDKFDRIWRESFEADGLLQQAVTRSFAEFINSPTFPRSSEYISLFIDENMKKGIKGKTEMEIDAVLEKAIILLRYVQDKDLFERYYKKHLCRRLLMNKSISNEVEKQMISKMKIELGNNFTLKLEAMFKDMTISEELTAGFKKHVEGLGEKDPKRIDLNINVLTSMTWSLETIGGTAEDGEGRPRCNFPTAVEKVKRGFEKYYNEKHSGRQLTWLANMGSADIRATFKKVQQKDGSYKERRHELNVPTYGMVILLLFNDLAADQHLTFEEIQAQTNIPPSDLVRNLQSLAVAPKTRILVKEPMSKDVKPTDKFFFNDGFNGKFVKIKVGVISSGNKVESDRERRETEKKNDDSRQFCIEAAVVRIMKQRKELSHQQLILETLSQLAGQFKPEVNMVKKRIESLIEREYLERIDGAKVDSYRYLA
>Arab_Me14_ctg01_-_Arab_Me14_ctg01g244t1
MRSSVSFLRSCARTAAPRAAWVQPAEYIPAASKRFVHTPRTSTVTRPSPIILRAGLPSLARFESSSATLPQKNTSTQAPETRLDREQVPSYELTFTCNVCKTRSSHRLSKQGYHKGTILIACPDCKNRHLISDHLKIFSDKSVTIEDLMKEKGNLVKRGSLSAEGDVEFWDDGSSTPRSAHFHTESSPKGEERLTDKNQTSSQTPKE
>Arab_Me14_ctg01_-_Arab_Me14_ctg01g245t1
MSKIFLIGATGYVGGTVLSQSLASTETSLKTLTVDILIRREHQAGRLRETYGERVETVLWAGLDDTVPCFFGEGTGLFNRQALVIPLVLRYVVQHGYGFKLNDQANFDWVYVVDLADYYIPLIRKILERPDRGVGHIPLGKKGILFPTVGRALVAEINQQAVETAFDADILLCEDTTQQREVRCVPIQEIADELIVGRCDIAPRG
>Arab_Me14_ctg01_-_Arab_Me14_ctg01g246t1
MTQFNINIVSDTICPWCYVGKKRLEKGIAAYKQKHPDSDDTFSTQWFPFYLNPDAGKSLDKQETYAKKFGKERTATMNQMLAKVGHDEGINFKFGGNTGNTRDSHRLVQLGKTKGPKLQTRVVEELFAAYFENEKDITTQEVLIESGVRAGLDEKEVKEWLDSGKGGAEVDKEVQDAREQNISGVPNFTINDHFQIGGAQEPAAFVQLFERIKKMDGSL
>Arab_Me14_ctg01_-_Arab_Me14_ctg01g247t1
MRTTASQLLLASLALGSAVTRGDKKHHGISKDDFIKVDGLRLYDSKGALHYLTGMNYWACMNLAADDQSGGNYSRLVTELDQMAAKGINHLRIMAGSEGAPTPQPFRMNPPLMNAPGQYNDEIFKGLDICLAEMSKRGMRATMTLSNEWQWSGGFGQYISWANNNTQIPYPESWNLTASPQRSTPGTGWGNYTKQGVDAAPYSEFTGFANLIYNNSLAEGWYKDHIKTVMTRRNTVTGRLYVEDPTIMTWQPANEPQAANALGYVGIGLLPNPDDLLFPWVDRTTAYIRSLAPKQLISLGFEGKQGEFYFKHAQNFSTIDYATTHCWVQNWGIYDMYNSSEANLKAAQDFAVTFMHNSSKWAADIGKPVFLEEFGMARDNWENKDKDYPYLSSASTTHKDQYFRTIIGTVMDEFRNGGAYIGTSPWAYGGVYRPEMQHVNEFGMIWAGDPPHESPGWYDLYDTDQAMEIIAVQQKTIASWIREQGKNGTDC
>Arab_Me14_ctg01_-_Arab_Me14_ctg01g248t1
MRSPIEFEKDHHYDRCRDSIDSDFSSSDNAAEPLAQADDVVPPPPPPPYSAFSLNRRRFMLGVVTAAGFFGPLTGAIYLPSLVLFEEIFRASATAINATVAMYMVVFAIAPLFGAVASDVGGRKLVYMVGLGSFLVANVLLATLPAHIALLFILRIFQAFGSCIVFSVGAGTVADITEPAKRASALAWFLMGPQLGPVFGPVIGGGFADVSRWRWVFGFLALTCLPVYCAIIFCMPETLRSLVGNGAVLAHQPWFSIPKLRTQPNTDIKGPKVPRPSFRKFMRLLKYPPHLIVSFNGAFQFAGLYGLYISLPTVLKDTYNWSTAEVSYAYLAPGISMFIASIIVGRGSDWLRRRSIAKSPDGKVAPERRIAYQIPGFFIAAVGKLMYGWSCQNRVSPAAGLIGSALASVGTSIVFVTSTSFQTECDPAQTASLVALGGFLRNVAAAIAAVVMDGLLDKVGVGWTFSIFGAMDLLCIPGILLIIFKGAEMRAALKAQQTHG
>Arab_Me14_ctg01_-_Arab_Me14_ctg01g249t1
MASYLSLVFVAVFVTIFGVVSFFVYLFTPPSNFPKNIPTIPFYYALLPLFKDVDQAELYRRYMKDPLEKYGAVKLFFGGQWNILVRKPTYIAEVFKYEDVYAKAGNQIKIPHSLVAEYTGENIISSHGEKWKLYHGVLKPALQADQDSTKIWENSRLLRNMFLDSSKQANGAGIPIYVPLHRVALANLSDVMYASSFETMQRPDAPLHALQMKIKPIIFNPIFMNFPFLDHLPLKMRQLGRALNRNFRNTLRTSITKGHNHVCDPNNHKNVACRLIGAHGEGRLSDKDLEDNMVSTFLAGHENPQLALMSLMYLLGAHPEVQDAVRKEIQTLYPAGASGDYEPSYTEIHDLPLLTAIIYEGLRMFPPISQLINRRTTEPVLLGGKISVPKGVFLGYNAYSTNRDIEFWGTDSDEFKPERWGKNMNEINHLYRKANSKGAFISFHGGRRACLGQKFAMQQLRITILELVRRCRAPLPTRSEDEVPVIVSWFDKMIRKSSNYTWNIPKSLDYA
>Arab_Me14_ctg01_-_Arab_Me14_ctg01g250t1
MAPFNKGVSTYHCIQGLYWRESNGELLAVEGSNSKSLPEVWPQLKDEILSSTASWARVQLPSGKEIKSLQITSDVPALSNIKSNFPPSYQKEELHTLIAEIEHDNGRVLGMVTSKPKSLASDSFSIWAERFILLETQFQPFANISDSSTPWAAKNREICQTIAEIFERKLKNLSKDDQWNVCGREGFLNRVYGFVDKNLPILLALPAFPCKSPNPNKAGGIMPDLAENIALDVLYDFIKEVNAVYEPGATMWIINDGHVFSDCIGVDDEMIDTYDACMAEIYKERFPGQTAPAPAMDFKGLKNIFNSDSEGFQTLKKVAGNAHKMPHPVKTKMTGEAELCRRLMLGIGGADRAFIRSLIEQQEPETLGLYRGQTRFMLEDLADVPSVKSLSGKQKKKTAALVAEEMISRNQGYSNLVELLLPNYVRLSIHAHNNKGPKFAIRLLPKHMVRPIDDLDNRMEPVAAYEFQIPTPWHNCMIKVEGDDFLYLARSAVAKKALASADYTGSWVNGPDGSYFSLKRATAWVRTPTKLIIPQLSVEKVAIFDQKKGTIVVVSPLAERQRPIVICSPVVGRKNPLVVTNSGNGGRPIVICSPQSRRSASSLWSPVLQKVRNPVGSPIVRTKTSIAICSPVTEKNGATVTQAPVDNRPFKRVDSHWVRPGEKTSRLRMFVQNNLPQLRTQAV
>Arab_Me14_ctg01_-_Arab_Me14_ctg01g251t1
MRPLDVFRVVMPIITLQFHGAAATTNTTLPRTYGIVLFRMFDLLDVHGPIEILQFLSGLYKIDIALIAETMDPVTSEPLMASMNPFNSSVYPVLPPSHTFATAPELDVLILAGGPGWRNPALNATLDYIARTAPNVKQVLTICTGSALAARAGIMNGRKATTNKTSWPNAVKAGPNTTWVPHARWVEDQSSTPPIWSSSGVTAGLDLMLHFVEQTYSERNATFIANILEHQRITDPSFDPFARKECVSNRAIVRSLHERVFDSRDSVAGITMWNISGTINSPGDQCTCQEDEKSQWSNSFPAPYPYKAYRCATYHLERRPQKEGLLQGVSFVAPICKAPLLGAY
>Arab_Me14_ctg01_-_Arab_Me14_ctg01g252t1
MDHSGHGMVASTTATVMSGMSDMSGMTQTATGTAAMASNTGMSMGGGGMNMGGGCKISMLWNWYTVDSCFVSRSWHITSNGMFAGSCIGVILLVILLEALRRAGKEYDRYIVNQYLASHATVAAAASSASSDDDSRKNPATTAAIAPTAQSFRPSVIQQAIRALLHMLQFAVAYFVMLLAMYYNGYIIICIFIGAYLGYFICGWESFTVGRGGSDRMQENATVCCG
>Arab_Me14_ctg01_-_Arab_Me14_ctg01g253t1
MAGGPSPSSTSPSNLSNSPFLHGSLSSSNSSSPPKLFAQSTMTADVFAPSHTYNMPGAIGERRPMERNGLSMLSFGDADAPPDNRTRHAIFLRKLPSNSDKEAVRNILLFAKDLVDCEMVPQTRFSEDKGFASAIAYFQTYDGAKEARDLLNGKRNATQDATLIVEVLQDGLGGAIGSRRNTVDSGSARHGSIASSTGIAGASSNARQSSRYNGTFQNMEKMSPPNGTPGLGNGEFGVSNLFSPTSPVQTSFASRNLGKSVINDEADDDNDLLNESIGYATGGPPAQSNMSRRATNPNPPVPVSRFASLSLNTNSVNGMGSPPLNSYTSPRSAATMQSPGPALSAMSPHNAPSALNTGPNTGFQQYSSHFARPTYPPVNPADQNPPCNTLYVGNLPMDTSEDELKAVFSKQRGYKRLCFRTKQNGPMCFVEFEDTSFATKALNELYGYMLHNSVKGGIRLSFSKNPLGVRSGQHASMGSASSITPSTPLSGFGSGVGAPPGFSTATGPPPGLSAPPGLASQSHANANNGFGMYANGGFGMGPNEMSSSMRQPMATGGNSFGGMGGSYSAYMMGR
>Arab_Me14_ctg01_-_Arab_Me14_ctg01g254t1
MPPRMRSSKFSSLPRPSPSQSSTRPQSITQSAQPSRQFSQTPCQQVTLRRRKFYEWLNGPGRQLKEPIPKSTNYLGAYDRYGNLVRAGPWYQRGAAKPQEEGQTKLTETTNEAAASTDEAKTPEGQESLDELESAARQADKKKADAAGKQDNSRLPPETAEDLRPFPLNQYFRSQPVLSEDLREAIYQRVKRDGATVSLASVEFGVSNERVGAVVRLKQMEKEWVAQGKTLAVPYSKAVLNMLPTTPHIDTSDPKNKGMRPVIHEPINDLIVHPATRQQLWVPVAESRHFTREDAGKAFDNNLLPADERIPHPELVKAERELASGLSFEERRKLAEERFVAQSAQKKREEEAKQAEMRAQKVVPQRRWDFVFKDISVESAGRNGRDARGVGWRYGLPHQDRKKGQVKIPTKVEA
>Arab_Me14_ctg01_-_Arab_Me14_ctg01g255t1
MAQKATKTLAAANTKRLNTTLYLTLSIHTLFWLLRALVFRSSFTRRSLFLYLILSAPQLLINLQFERLSRPTHLPDGSIKRPGEDLDAPGLTEYMWDVTYWTYGCIALASLFGDWVWWGMMVVPVYSVYSLYGVYRGFRGGGGGYTDAAGVPQPEAAQSKRQAKMEKRGGQRVAYR
>Arab_Me14_ctg01_-_Arab_Me14_ctg01g256t1
MSPPPSAANAQLRQLIHYHLDNGFTENALFLAGRLHALDTRNADAAHLLALCNLRLGRYKAAFEHSKNKAAQAQHLGCVHVFAQACLRLGRFELGATALEKARGLWHGRNHWNKHSETSRRHVPDAAACFCMLGKLWAAHGDTKKAIDYYVEALKLNSFMWDAFTGLCDIGAVVRPQNVFTITPTMLESISHAAVNGHAPQVALPKEDLETNNPFVSRPEDDPFNPPTRQRGDVGLNMGGTNLLSKLNGRNPAPSATRHHNVETPVANGQDPDEDDMMMGEGGGPVMTERGPADIMHAPGRKIRMQPFAAVEDPPRMRPMTSRMRTKTNPSDGEQTDIPRPVNQNGHKRTVSGHSTHTQHTQASQLHAVDPTAAPPRRSARLFNHISSITSTRTTNRPPAAAPSRDPETRERRELRKVKATGTKGRTGTTSTVGRVVSGNRKPTLDATEPLEPKPRPLSAAAIAPPPPPRMASQTDTARDREALTWLLDLLHRIGAGYSYLSQYESVKALGAFASVPVAQRDTPWVLAQIGKAHYERAQYADAEKAFKKIREKSPSYLEHMEVYSNTLWQLKDEVALAHLAHTLIDQDRLSPQAWCALGNASSLERQHDDAVKCFARATQLDPKFAYAFTLQGHEHVANEEFDKAMQAYRNAISADNRHYNGWYGLGNVYERMGKYDVAEKHYKAASQINPNNAMIIVRIGLVLDRMKRIDVALTYFDAAVKLDPRSIMARFRKAQVLLKLDRSEESLKELLVLKDLAPDDANIHFLLGRCYKKQRNRATAIKHLTIAMNLDPKSHGVIKEVMESIDQDDDGAWSSEEDR
>Arab_Me14_ctg01_-_Arab_Me14_ctg01g257t1
MSPKRKPKTQALPTPAPENISNREYYRASETTDTSPHADELMEFPPGPPAEEQQDGSGERSEVQSREQDDGGFVELSRPGRPSPSPSDIVARCELEDARAMGDLERSTRGLERRERKRLLIALQERRRRDREVQAEEGERRGGEERNAEYDEMQRKGREEV
>Arab_Me14_ctg01_-_Arab_Me14_ctg01g258t1
MADPTYRAAQPGEFFCPAGGKCCETKSSSSVSRKHSSDALSLRPAGRSTALDNQSPGGSCGGQTPFWTCAQAPSFYGCCNEDPCLNNSTCPEGKLEPAFWDRPDQYEYFKDLNILLSSTAPRSTSSPTPTTSSKPSSGSKVSGAVIGGAVGGSLAFIAIITAVVFLLCRRKRRNREQRSRSSSGGPMEENKPEAGELASPLSAAPPTYSWDANGNSPVQQRWVHNHASGHELPGEDSRDPHRSPYSELHSKSSLARIAELPGGTGVKELDTPEITPKPSHKEFENDMVKREYGLGLNTTQKESGEITGKR
>Arab_Me14_ctg01_-_Arab_Me14_ctg01g259t1
MDSSAPADDVAAPANTAAADAAAALAAPANTANTAPANTANTAAADAAAAAAAATAAAATAAAALAAAPALPPLPPAPGPPTAAALLAMPPASRACTRLASRPVQRQLEFRAGYEPSKFNLAVRQQNLESALAQVVGRVAPTECDSCQRAAGPYTTCVVVTGQLLDSCANCHYGSEGARCSFRPTPAPVVPVPAIATPSRSRRQVAAAAPAAAAAPAPAAAPATPSKKRRRTTATPAASPAAAAAAATTATASKKEKKKEKRKRKKKKVRKCVRDVKKSVAALELAMDSSSSEDSDEDDED
>Arab_Me14_ctg01_-_Arab_Me14_ctg01g260t1
MQVPCSACGALHWIDERKSTTSVTDPRFTLCCLDGEVDLPALTPLPSYLYQLLNTNTLAARHFRKELRAYNAAFAFTSVDCTPTSRGAQGPGVQVFQIHGALYHRSGPVEVLKGSLPQYAQLYFYDPQYAANARHQRNSHLQLQILQDLTAMLYEINNPYISIYRTAQDRLNSSAADARVILTSRLTLALETGQDRRRENVPTSDELGLVIPDAAGAETSRPIVLAARNSSALFTISAAHPSYMPLHYVLMFPHGDSGWRPGLTLRNQDGSRLQTSLTQQTYYRYYLHPRPGQTTNPFRFYRLFQQYVVDIWAICDQARLAWIRANQAQLRADLYSGVADAVMGNNDAQAGPVGRRVVLPSSYLGSSRFVSQCYQDSMAIVRRYGRPTLFITFTASPYWPEVARELRPGETGLNRPDLICRAFHLKVQKLVADVKSNLFGTHLGHVYTIEYQKRGLPHIHLLLFLTPHNREAFTDPVTIDSTIRAEIPSPVDDPDGLLTEVVRTFMLHGPCGEHNLQAPCMVPQRDSAPPRCSKNFPKRYCPSTVVHKDGYPEYQRRDDGRTLAVRCKGRIVHLNNSWVVPYNPGLLRKYWAHINVEVCGTIHAIKYVHKYIYKGTDRAVLNVSEADEVKQHLNGRYISPSEAVWRLFEYPVHMERPTVVPLAVHLPNEQIVTFPANATTAELSARLERSVTTLTAFFQRNADHEYGREVLYQDYPSQFVWHLPSRTWHVRQRGTAIGRMYFCSPLQGERFYLRLLLTTVRGPQSYADLRTFSGTEYPTFQAAAAARGLLLHDGDWVACFQDAVTFATGQALRYFFVAALLNGPVTDPAAIWAAFQADLCDDLPEAAAALLVSADPDAYLDYGLYLIEGLLAESGKRLTDFSLPACQFNWGVRLQNQLLAAELAYDTDGQDTAFWDTVTGLNMDQRAVFDAVTAAIEADHSTAHFFVQGPAGTGKTFLWRCICAYYRSTGRVVLCVASSGIAAVLLPSGRTAHSRFRIPLDIHDDSICPVAPGSELGRLLQAATLVIWDEVPMQHRYCFEAVHRMLQDVRSSPALFGGLPVIASGDFAQILPVVRRGQRPAIVNACLQQSTLIWPHMTVLHLRQNMRVLSGADNTCFAAWCRGLATREMDGLISIPDWMTVYYSLQGFLDHVYPPHLLQQAAADYQVLNGRAILAVRNDAVAVINAAMLAAFPGELVELVAVDSAEVEDNTTQDLPPVELLQSFEPPSLPPSRLLLKVGVPIMLLRNLYPSQGLCNGTRLAVTQISSRCIQARILSGEFAGQLRLLPRIRLTSTSRELPFIVSRVQFPVRLSFAITVNKSQGQSLSVIGVNLRHAVFTHGQLYVAMSCVTTLAGLSILLPAPDTSDEPSCTVPNIVYPEVLL
>Arab_Me14_ctg01_-_Arab_Me14_ctg01g261t1
MPTLNTDMSVKTELSQKDAFISERSQHRNSRITEYQLAVEEEGESIRTASECAEPLTPASHTSGDVPFSHSFHPEDHADELYETSKPAMGFDAVDALHPTVKDETRPELRPTSAHSNGKNATQHKAQASSERRGLGRRVGSFVRSRLHRRNTPQEDPKDLGLEPHISRQAPEARSDINQLLVVDTAEESTNIDSSAISFPRPSSRLSSLSLSRSPPRSSRAVTPPPFSDSPISDTPAEEKKRKSGLERKPMSSTALSSLSPSKPGITWAEKAHGNKRHTWSRRRSASTDQMPRFGQDENKPTAGMLNTFSKPPEKGVGMKARRLSLNLPSDYIIDQCELEKEFKSSSLMPGKRGKVLGKGATAEVRIMARRGVSKDEQLVAVKIFRERNPEETEEDYIMKIKSEYSIAQSLHHPNIVETLRLCTNRGHWNHVMEYCSHGEIYSLVERKLFAGGVEGFYSREDRLCFFKQLLRGVDYLHSHGIAHRDIKLENLLLDKNGHLKISDFGVAEVFSGEHPGLRASGGQCGKNMGAVRLSAPGICGSLPYIAPEVLAKRGSYDPRPLDIWSCAIVYITMTFGGCPWQAAKTEFEYYARFKRGWEQWLANHPDGELFEGPDGYPKCGKLFNMIEGPAIRHLILRMLHPMPDKRITIHEVLNTSVIRNVDCCCPENYDDPKCCSDGPNPVSAYKRFSPKKPLHHHIPPKPEHKSRVLFFEVGEA
>Arab_Me14_ctg01_-_Arab_Me14_ctg01g262t1
MSDQKKYSNKLQGLRILIIGGSSGIGFCTAEACLEYGALVTIASSNSSRVEAAVSKLQSAYPSAKSGVYGLTVDLSKSDTLESELKTLFDQTVKNMGGEKLDHVIFTAGDALATMKLADMTMESILKAGQIRFFAPLLAAKFVPQYVKNSHESSYTITTGSISERPMPDWSVIGSFAGGHHSMVRNLALDMKPIRVNGVSPGVVDTELWKMPKEEKEKLMEQMSKKMATGTPGKPEYVAESFLSCMRDYNMDGAMIRTDGGGLFM
>Arab_Me14_ctg01_-_Arab_Me14_ctg01g263t1
MRLHAALSLAACLAPVSAIFEDDAYHIDFHYALLGLPKRDATFFQKPYGGSKASLLYSISENQTIGAINPKDGALVWRQHPASEPRSKGHLRAADEQDTIVSAAGNRVTAWSSSDGRLVWETNVDGAVVEDLEILEQEDGITKDEAKDAIVLVSGTSHGVKRLDGKTGRVKWTYEDTSSDMPFQVSTSPTTIYYISLHPSIIGAGSKLKVTSLSPITGKKLDQYTLSSDTEITSRDHIVFAGANTAAPILAWTDKTNKVLKVNIIGTKAVTSFNTPGNYAIEKVVLHAPGHVNSQAHFLVEYQTAFGHSAEVYHVDLKKNTVSKAYSLPELQVRGTFATSTSDANVHFVRITEDEVSVVSSTSHGILGRWPTAGSPALAGGYPVHAVSEVVVKSGAATATRSAVLFSNGQWALIRNGEIAWTRPEFLSQASSAVWAGLPEVETLAAELEVERHQNVVSAYVHRVKRHIQDLEHFPAWAQSLPQRLLGSVVGKPKESTVDDIQQDTFGFHRLVVIATESGRLAALDVGSRGKVLWNVHLERFADTKFEYPTLKAHSGYVEVKDPSFDGSVFINSTTGGLASSVNLQMHMPLVAEGQKLVSFGLANGVLTGTLPNQPSSESIWSFEPPSGERIVGYTLRPLNDPVASIGKVLGDRRVLYKYLNPNLVLVTAVSDSTRTASVYLLDSASGQLLHTMSHSDIDTSRPIPSTISENWFSYSLTVDSTSSPESRGHQLIVSDLYESPLPDDRGPLGASSNSSILEPSSSQGDAAKPYVLSQSYQIAAEISHMTVTQTRQGITSRELIITIPSTNSLVGIPRQVIDPRRPIGRDPTANEQAEGLSRYTPLLPLDSKWHLTHKYEVLGIRDVITSESGIESTSLVFAYGHDIFGTRVAPSFAFDILGKGFNKIQMLLTVAALFVGVLFVAPLVRRKQINSLWTIP
>Arab_Me14_ctg01_-_Arab_Me14_ctg01g264t1
MSQREYHIVVLGSGGVGKSCLTAQFVQNVWIESYDPTIEDSYRKQIEVDGRHVILEILDTAGTEQFTAMRELYMKTGQGFLLVFAITSASSFHELAELREQIRRIKEDDNVPMVLVGNKSDLEEDRAIPRPKAFATSREWNTPYFETSARRRANVDEAFVDLCRQIIRKDANERRHPQAIDPRTGGGPRRGGGRRDRERRPRHRPKCAIL
>Arab_Me14_ctg01_-_Arab_Me14_ctg01g265t1
MSAPNANKPNEGIVGQIGNSIANAANYVSETVQGNAAEASKEGNKQQAKGNVPGQDSISDRVSGAMGAASDKIDQSKHEGSAEANKRSV
>Arab_Me14_ctg01_-_Arab_Me14_ctg01g266t1
MALNFLSRRSLKGEKATLGTSFGSHFTPLGFIQLFLRFFQFVLGITVIALYAIDLDNARKAGKYTDSKWVWAVVCGTLGAIMALVAMLPSVKTWFFFFVDFFVFICYLIAFGIFGKMYIPENAEGNGGITRMKNAVWVLLMNMLLWFITAAWGGIAFWRNRSARTTHTGRANTHV
>Arab_Me14_ctg01_-_Arab_Me14_ctg01g267t1
MADERPTGLKANKGIELLTWGTPNGWKASILLEELKEAYGKDYTWQGINISQNIQKEEWFTKLGPNGRIPVIVDHDKGGFAVQEGLAILTYLTRHYDPEHKFSFDDDLDVSRAEQWMAWQHGGLGPMQGQANHFNRFAKERIAYGMQRYTGETERLVGILDKQLKDNDYLVGNKYSIADVANFGWIHMLRFSGVELDSFPNLKAWWERVLARPAVQRGLSIPSKSGFGNDTYLQKLKDDSEFAQKEHELREKVNAAKEQYGYKYSSP
>Arab_Me14_ctg01_-_Arab_Me14_ctg01g268t1
MYLRTSAVSAALWLAVSATPTYGSSTNTTIEFKHWPANASRALSNMIVQNANQSNYAVFDMDNTSYRYDLEESLLPFLENRGILTRENLDPTLKLIDFKDTANFTETLYSYYLRLCEDDDFVCYPWAAQVWSGFTLRELKGYVDELMALNTTIPTQYWDGDEVVNSTVNSPQVFRGQAELYNALMDNGIAVYVISAAHEELVRMVASDPKYGYNVPPQNVIGVTTMLVNSTSGFLTNARKQIVEGNYDPEANLDLVLGPYLWTPATWFAGKWAAILTYIDQWKRPVLAAGDTPGSDSYMLFHGVDTAKGGIHLWINRRDAYWEEMQGEIRNNTAAQIANGREVTADKNWVVVKPADIL
>Arab_Me14_ctg01_-_Arab_Me14_ctg01g269t1
MAGILVMGVALGLQEGGKKIKEKRDERKAKKAALAAEAYGPAESSSSGAVRGHATHRDSRPGRKSEEARREQQHHSFSSEEAHGEDAPPGYEEVVRPTYEEAMREDLHRN
>Arab_Me14_ctg01_-_Arab_Me14_ctg01g270t1
MPRWAASVNRGGVLDRIEAPVTLRGYLLCVFAAFGGILFGYDSGYISGVLAMNAFKQQFGGPSTAEDAYHGRLYQTWEKSLIVSILSAGTFFGALFAGSLADWIGRRSTIISGCGVFSVGVVLQVASSTVSVLVAGRLIAGIGVGFVSAVIILYMSEVAPKAVRGAIVSGYQFCITIGLLLAAVVDNSTMNRMNSGSYRIAMSLQWAWALILGVGLFFLPESPRYFVKCGRLDDAAKSLSILRGHPADSKFVADELAELEANYQHESKNMQSGWLSCFSGGWRSPSSNLRRVMLGMALQMMQQWTGVNFVFYFGTTFFKTVGLKNAFVISMITTAVNVGSTPISFWTVERFGRRMLLIYGAVGMLVCEFVIAIVGTVSEGSHAASMCLIVFTCFYIFFFASTWGPAAWVVIGEIFPLPIRAKGVALSTSSNWLWNFVISFVTPYMVDEEYGNLKTKVFFVWGATCTACVVFAYFLVPETKGLSLEQVDRMLEETSPRQSSKWVPHLTLGGHGETSSLESTEKAGLGARHEEDVSRVEHV
>Arab_Me14_ctg01_-_Arab_Me14_ctg01g271t1
MSAGPLPHPQPPTTSTPPAPPASSAEPTVTTSNTSTQPHTPHTPQRGDTAQPLHHDETPHPSRHDETPHHVATHDNTTHDNTTHDNTTHDNTTHDNTTHDNTTHDNTTHDNTTHDNTTHDNTTHDNTTHDNTTHDNTTHNNNTHDHGDLQPVTHLEPDSGSDTDSAFDANSSTSTSLASSILSYEYSNGRRYHGYRSGAYVLPNDEQEQDRLDLLHHIFTLILGGNLYDAPIHPPPRRVLDIGTGTGIWAIDFADEYPGSEVLGTDLSPIQPTWIPPNAKFYIDDAESEWVYSLDERFDFIHVRTLSGAIADWPKLTRQAYAHLHPGGWLEFQEPVALCESDDGTIDLAEALLRWQALCNDAAKVFAKDIRVGHTLKQRMLDAGFVDVAEKVVKVPIGPWPKDARMKEIGRYQREHMAMGIEPYTFGFIGKILGWSEQECRVLIAQVTNDVRRKDVHMYIKFYFVHGRKPQSAV
>Arab_Me14_ctg01_-_Arab_Me14_ctg01g272t1
MAAALAHLMASAAAALPVLAASLLTYALALAVYRLHLHPLAKFPGPRLAAVTSWYEGYYEIVKIGHYSRKISKLHDEYGPIVRVTPHELHIRDSLFFDDFYAKNLHLDKEGWDVRFGTEGGVLTTVNAAFHKRRRAALSPMFSRRSILDFIHIIYRHIDTFSVRMQEFEARKEPLNLTHAFPALTGDIIMDYFFGFNYAQLKHPEFESFHDAFQKIGGAGHIATQFPFMIPMMNSIPDAVTEWLQPAAKNILKFKRDQWSNIGRTMAGDPVKTNDAKKTVFQEILQSKLPDEDKTQKRLAEEAQIVVGGGVETTAFALCIASFHIINTPRIYERLHADLVAAFPNRSTLELYPLEQMPYLKACITEAVRLSYGLSARNPRTRRTTPLQYKDWLIPPNTNVSMTIPEVSHDESIFPNSHAFIPERWLDNPLTPDGLPLERFLVCFGRGTRSCLGINLAWTELYLILGMMFRRYRFELHEPNVEAVQLGHDFFIPVTKLDSKGVRVFVESVDH
>Arab_Me14_ctg01_-_Arab_Me14_ctg01g273t1
MTPEEASSLFQKFMQASPRTHAQFGGSGLGLYISRDLAELHGGRIGLSTQAGFGSNFEFYIKVRRDQTAELAEPPLDLQHMNMASPAMQQHVVPTRLKSEATPENQAAHEQSSSDSKPTILIVEDNLINQRLLRRLITKNGYDTLAANNGEEALGALSTSSWNPLHAKTHGGSAQRLDMVLCDLEMSVMDGKTCVRRVRQLQGAGHLSSAIPMVAITGNARAEQVQEMKACGFDEVITKPYQMGQLLAVVGKYVRQTARQPTRQPTRQST
>Arab_Me14_ctg01_-_Arab_Me14_ctg01g274t1
MVMYEGPLALLLEYLDASLQPTFVLHLLDPDPNLNRETQEVVLQHTNPALQRFRSLHAELVDLSQTTAAFTNSFSSLSHSGRTLHAGLLESLVLFCGAKWTVTIVGDRWLVAVSTEQHGGWTVSTAAPEGRGAETQKSTNAALSIRDIPHRPPLGEILPHGHLGDLDHLKWMREYNWASSPCGLVELWPAELRHACEFALATSDPINIAWGDQYTLLYNQAYSVVVGEKHPRAMGRPFKENFEQWKEHYNLRRILVRDGFSEETFANLYMAPMLAADGSVAGIFTHVHETTHEVISERKTQILTDINKAMAIAFGVLDGASSDVHFSAVYSTGLKNDTLDLTLQATAGLNENHHKTPPRGDPDVPQFGLNRVLLEVCRNYESRILSTYDDSLTQSTLDQLREYDLRVPCREVVIHPLRNFIENNVAGVIVIGTSPLRKLDEDYRSFLGLMTKQIENGINVVKGIEKEKELHKAQITSKLEERFWRFAEKAHVGMYMYNTDDVLTLWNTAFEAIIGKSGEKLTGPMAWLDAIHPDCIADISSIWNGYTNSKHEEAIAFDIQFKKPWKSQKDGVEGSLDRTWALGTAEKIQAEQLSEALEQKRQQENFLDVTSHEMRNPLNAIFHCASELMDNVKFKLESSDASKGILELFAPEIRASGMNTNLTIVINLLSNAIKFTKKGKKRDLEMTRTLT
>Arab_Me14_ctg01_-_Arab_Me14_ctg01g275t1
MSSPFSTQYVTGIYLPSAVLLIGTAAFKSEWLPYALALTAILTGAVLFSSQGGGRKVLKPDAFQEFELGEKTVLSHNTAIYRFKLPKENDILGLPIGQHISLAANIEGQPKEVVRSYTPTSSDNDKGFFDLLIKSYPTGNISKYVANLKIGDKMKVKGPKGAMVYTPNMVRHFGMIAGGTGITPMLQVVKAIHRGRAAGDKTEVDLIFANVNPEDILLKDDLDALAARDPKFRVHYVLNNPPEGWNGGVGFVTADMIKEKLPAPASDVKILICGPPPMVAAMKKATEGLGFTKARPVSKLEDQVFCF
>Arab_Me14_ctg01_-_Arab_Me14_ctg01g276t1
MATSQLTKSVVEAIKERRTYYQLNKEAPISDSKIKELVEQAVLHVPSSFNSQSTRLVVLLNKDHEQFWDYVVEVLKPLTPEDKFDGTKQRISGFRAAYGTVLFYEAPEPVENLRKQFPIYAHHFGDWSEHTNAMHQYALWVALEAEGFGANLQHYNPVIDQKAAEHWSIPLEWKLRSQLVFGGRAGEPGEKQFQKTFGERLFVHGSKE
>Arab_Me14_ctg01_-_Arab_Me14_ctg01g277t1
MAGFAEPDTVPTQRVFYRPAPVPEREPAPRRALPNGPCNYRDASVGPCGCDQFWDKSSAEIHDGSTHHRPPSERVPWCVCGHHACFHLRTSRAPEQPPSATQTGAKHLEQQVNVEEAPSAHEERIQKSFHGSSQRLQRPAASEANGSGRMLQSRDTPSQVSTTGLPGLPSMCMLPHDRRPAADDEARHAVNRPRGSVAGLGLSMLNMESMRSINRQQSASPTVADDSVPPPLQRAFSEPERASTRDSSMPADSIRLLSDLRGPLEQIKEFNRNLHLDVAGDTIPNTLDPHDFIQSATEAATPSIRGTPDLRAADNAVQQGKKLIDALSRLTSNKPGPNGSPNKPASVTSVPSQRLRQINSPSGQQEEQLQKVLRSASPQDLQKLVSYLAPLHNLLNSIPNVAKTMRELGSRLDVLENGSFNYVQPEDLHQTLEMYDDRLITVEHRMDEHDRMHQAIDADDSSFSHSRRRIDNVTGSFTSNQSLQSTTSSALILAAMDRKDKEAELGDIKDRLEVLESAALPTMLNPWEVEVILLPWGRELRGIWFSPDQPMHDSSKPTTQDSEEWTQARTLKLAQSLQNLRDTDSSPNPGVKGVFSDTESGWSSQAISDWASGSTDDWLYPKACGANNLVYKRLFSRGFIRNVTLQSASARDIQATLSHAFSDVMEWLHFTDRDEDQMVATHPALRASFIPLRKVMKESKLRFLTPSEMSSSAHWSAQFLAAGVIMRVSGGKRRLYVTQREAYVQRSDEMGSSWTWPELRQLPRYQPDQDLQMDGNDEHCQPVPEADAKEACWQYAATYDAPPVSVQSSFSSHQSVELSMRPADRQWRRSITPSSILKNRQQQPLSPLSLFRQQRPRSLSRTVSTSVLEVPGSAKRRLNSSPTKHASSQPLHARAPSVSVARLKRRRVTYSSSPRQEEAAPEEAQVTVCNPTPRRSREPPSPHFTHPALPRSSSDVTSRPSQRSTTRTSNPAAFAYATPASGPFIGGPAFGGYNQGGDTEPDDDDDGNEDADDADDDDDGEQSWHGVTDGDEVSVSSSDSGVGVGAQEMVSFSGDDSGFESENDASQSEGDRTPTAQRRRLDEDEDEDEDDDVDGGDGDEIFDTLLEVLEPRHHQCTLYECDSS
>Arab_Me14_ctg01_-_Arab_Me14_ctg01g278t1
MALDIKELAKEWLELDQDKSTRDEIYQLLHHGNTAELELRLRNRIAFGTAGLRGPMQAGFACMNSLTVIQASQGLAAYLLKTEADVKKRGVVIGRDARHNSEKFAKLTAAAFVAKGIKVWWYETPSHTPLVPFGVRELGAAAGVMVTASHNPAKDNGYKVYWSNGCQIIPPHDTGIAQAILENLKPVTWDTSIVDEPCLMVEGSLDLVRDNYHQAVLCAAQPAHPIKLNPDLKFVYTPMHGVGLPAMKRCAETLGVASQMTVVEAQAQPDPDFPTVKFPNPEEKGALDLAIQTADAASSNLILASDPDADRLAVAEKVGDRWHIFTGNQLGLLLGAYIFERYPASKPREKLAMLASTVSSRSLAALAAKEGFHFTETLTGFKWLGNVARDLEKQGYQVAYAFEEALGYMIPQTVHDKDSISAAAVFLTAASQWSEQSLTPYAKLQQLYERLGYFEDANTYLVSPSPTVTAAVFTDIRALGSPHPTTIGPRRIMRWRDLTLGYDSKSKDHTPDLPVDPTAQMITCELDDGAVFTVRGSGTEPKIKLYIECQGKTSEDAKKGANGILQDLLREWFKPETNGLRLA
>Arab_Me14_ctg01_-_Arab_Me14_ctg01g279t1
MDVQTQRKARIFSRREIEGQIANGRAIVIVDNRVLNVGAWMPYHPGGDKAMRHMIGRDATDEVTRFHSSQTLELMNRYQIGRIEGRWTNFLPPIQGGKFRTQAELERLSEDEYLESCSSSDHETASSTCSADQSPVFEPADKTSSIRQRTTATIARASSSSSVSSIGLDDASGPPKMSVLDRRTQQELDLDKAKYPSTDPQTQDRITQKYRDLHEEIQARGLYNCNYSSYAVECLRYGTFIALFLYALYSGWYITSAIPLACVWHQLTFTVHDAGHMGITHDFTTDTTMAMFIASYMGGLSACWWKFNHNVHHLVTNDPEHDPDIQYIPIFAVTHRFLEGLTTTYYERVMEYDAAAKLLVRIQHYTYYPIMLFARFNLYRLSLEYLLGGKGPKKGPAWWHRYFEMVGMIVFWTWYGYGVVYKTMPDNFSRFWFVIISHALTSPLHVQITLSHFAMSTTDLGIHESFAQKMLRTTMDVDCPQWLDFFHGGLQFQAIHHLYPRIPRHNLRETQKLVQDFCNEVDIPYALYGFLDGNKQVIGRLADVARQAAIFAECQRTIAAEGDYGLH
>Arab_Me14_ctg01_-_Arab_Me14_ctg01g280t1
MTSPAAAAALPETEDFESITGAQESAEPASSSSTTPTPTPTAASSRENSTSSQASVVHAPASSTQSSAATQIPSMHRPSLARDRTLNVSGSPSPASSALNSRDASPARSLQRNTNAPPASTARSQSGLRSRKSSTDVSPNRGPGTNSPGLSAAAIQRALSSTSIPQLPPVSSSDSVKAPRPLKSPSALVSGDSTPHWPHSPRLKSPPPPDARSHSRSRRNSLRSQTRRPEAPSTPSIVVQHSSPSPASTSRAPAADEAVTPGDQDEPIMSLSMKAPSRGASGVAPKLATVQESSLPATPGFDGVEPQSFTPTATTHKKFEEDRNDVSSSKVTEDLSSRNNNANNNNMHTGSGSDSGTKNGRKGKMQEQRSSSTHRVSSNVSTKPSLTSLSSRARDPPLRNMTVETETVPSIAQATISNQDRSASGRVDGSLRLKPSNETIRPKKERKPPKRKAPSIHSGTGRSSQLSYHYRIPSRPDMAPRSNTASSYGSQMSLRSYDDRRSMLTMSPPASPEMAVSAYAPSLSYFYSNTNSSSRKASSKADVFEQKVASAVDEANSSDSDATFIYESNPPEHQPHRSRGHHSRTPSMTSIASLADPRLAIRNEHKNPGKKSSMKFTNPYNNPNLDLDGIDRGEGTIRLGSGRAGTGSHHHHIGRHGQGRGALSHILLNDDAASSMSQSSRGRGPSSRHPSQPNSPRFHNFTVANGTVNGNNKYGELSAYDIDAGIVADDERTPLIPSSRSPRVRTPRRRDSVTLSNLQRQLDRRHRNEGGWCRRFAGCLVLSILLLVVVFSSVGLVFATTKPLTNVGIYEIRNVVASQEELILDLVVDAVNPNIIGVTITDMDVSIFAKSKHVGSDKWWHEHGNGVPHNNEEDWQSIEASDVVEATDKTPDGVDEGTDPIEDPDVGEPRTMLLGRIFHFDSPLNFDGSFWQRHCAESIGEIRLTHPGNKTEAGGTKRWEEVSQYPFELIVRGNFKYQLPLSTRDLSVVVTHTYHYDPDAEKRRLIKADESRVEPTKTEHPAHAVPSKPLGRYDRRVVPTLQCR
>Arab_Me14_ctg01_-_Arab_Me14_ctg01g281t1
MLSRRFLSLAAWLVAFAAAQSCVTDNDCSLNGLCLPSTKTNATSTCRCDPGWFGDDCGRLDLAPAARYTGFNETNATAPNHYSNRGNSSWGGQIVQDRDDPKLFHLIYDQFAYGCGLSGWRPTSFIARAESTSGPQGPYIWRQNITSSFRHNAYVYWSPADRKYLLWSIGVNIPDPKQCGGINKAQWPNNISVSSAPTIRGPWAPFKILINGTNPAPAPLWSPNHPTGETILAAEDLSIFTAPSYDGPYKQVFSAPWNTSNYSPTWAEDPFLWRDKRGHWHALAHWMIDITERGVKYPRVGTHMYSRNLTGPWTFKLQEAFNSTVNFTDGSVETFNRRERPKLFFSDDGEVTPLYMVNGVQRLGSSTESYTLVQPVGNKWRELEAGLGFS
>Arab_Me14_ctg01_-_Arab_Me14_ctg01g282t1
MDAMITAPAPEPERLTEDLDNLSLSPFGVARSSVNETPLSDDEVRLMTDYFHASLYMCLGMIYLRRNPLLRDPLTLDHLKRRLLGHWGSDAGQSFTYIHMNRLIKKYDLDALFISGPGHGAPAVLSNSYLEGVYSEVYPDKKEDEEGLRRFFKYFSFPGGIGSHATPETPGSLHEGGELGYSISHAFGAVFDHPDLIALTMVGDGESETGPLATSWHSTKFLNPITDGAVLPVLHLNGYKINNPTILSRVSHKELEALFVGYGWTPYFVEGSDIPSMHQAMASTMERCITKIREYQKQARDSGKAFRPRWPMIVLRTPKGWTGPRKIGEHYSEGFWRAHQVPITDVLTNNESLKKLEEWMRSYEPEKHFDKDGKLIPELRELAPKGNRRMSANPVANGGLIRKKLHVPDFRDYSIEVKKGGVSKMGSMANFAGFLRDVVAQNPKDFRVFGPDETQSNKLDKIYEAGKKVWMADYFEEDEDGGNLAFEGRVMEMLSEHTVEGWLEGYILSGRHGLLNSYEPFIHIIDSMVNQHCKWIEKCLEVEWRQKVASLNILLTATVWRQDHNGFTHQDPGFLDVVANKSPDVVRIYLPPDANCLLSTMDHCLRSENYVNVIVADKQEHLQFLTMDQAIAHCSKGVGIWQWASNDKGEEPDLVMASCGDVSTHEALAATGLLRTHLPQLKIRFVNVVDLFKLIDSSEHPHGLKAHEWRAIFTDNVPCVFNFHSYPWLIHRLTYGRKGQQNLHVCGYREKGNIDTPLELAIRNGTDRYSLAIDAIDRIPGLGNKGASARETLLNEQIRAKNYSYHEGLDPKEIGDWVWPF
>Arab_Me14_ctg01_-_Arab_Me14_ctg01g283t1
MSDPVEVKAYGGDHHVEKAYSQVEDAHNLDEKALAAQYKAAAIEAENVEHDMGVLQAIQAYPMAALWAFIMSCTIIMEAYCVFLMGNFIALPAFTKQYGVPDGEKMIIVASWQSALQMGGPVGAIIGVCLAGPLTSRIGYRWATITGLMLLNVFIFVFYFADSLPVMFVSQLLEGIPWGIFIANAPAYCSEITPIQLRAPATQMLQMFWALGAIIVTGVTYFYNTLDDESAYRIPIALQWMFPTPLAILLWMAPESPWWLVRKGRLEEAEHAVARLGRAATLNASEAVAMMRRTIDIEKTVKDPNHLELFKGTDLYRTLIVCGVYAAQNLTGNLIANQAVYFFEQAGMKTNTAFALGLITSALQAVFVMLSWILTSYLGRRTIYVWGSLINVGFLIALGIAASVGASNAASLAQASLGLIVSVLFTLGPAPASWVIIGETSSIRLRPLTTGIGRASYYIVNIPCIFLSSYMLNPKEANLGGKCGYVWGGTGFACFVVAYFFLPEMKNRSYREIDIMFKRKIPARKWSKTVIDVQDDE
>Arab_Me14_ctg01_-_Arab_Me14_ctg01g284t1
MSVRVVARIRPLLKQELDRDTIVTAEALDGDSTATVVRLPSPKNDAESFSFQFSSVYEQEATQQQLFDAEIAPTVKHLFNGFDLSIFAHGCTGTGKTHTMRGGKSLADRGVIPRLLSAIYRRCKKVEKDTAGATNVEVALEYFEIYCDRVYDLFEPPEKRTPSGLPIRDNHGKTVVVGLTEKPCTTLKEFEQLYDQANMNRSTSATKLNAHSSRSHAVLCVKITQTTETTIRISRASCIDLAGSEDNRRTENNKERLVESSAINKSLFVLAQCVEAMNKKQSRIPYRESKMTRILSLGQNKGLTVMILNLAPTRAYHLDTISSLNFASRTKKIEVAEVENDPVYRSMTKPLAVTSSIGGANIKRQPLRALTAAANANVTETGKEKKGEKPVKAFSVYSDSRKPVSRVSNLASQNQGVRRTEAQKRVAEPSSTFVTRPTKTFRAADSTSRVRNIEPGMTKESIEALIAQRIDERLAEKALQDAATAAPALSDELQRRLDDLEHRIDAKEDDGKSQGLQFLLMAKQHHARGEDVSALRMYHLAEPYFPGNEKLQLKMRSLEDRIRLKREDGQKHVSTTALPAPASSLMAPLKADKKASRPKTVFRDDAESEDDGFAPPPQSDHDDSFASEDSFVARPKVARKPKKVMKKLPIFRDDLDLSAAPGEQTPRTSHLLKIINSRDVNQIKSLKGVGLKKADAIVNCLMEMDNAEVQDLASLATLKGVSGKTVENMRMGLSIGGDYDF
>Arab_Me14_ctg01_-_Arab_Me14_ctg01g285t1
MINGPSDELDVGAGADGASLGPAGASVGEGSTFVTEYGGPEEAGPLGVGSDEAMGDDDAASVLDEELGASPVLGDRVVADSALVDTEDGAAEITILDDEDAGVENTGGVSAGAEDGDGKTVVYCVTITTGGTCSDVEGRSSAEGDCTTEVWTEEDTGTAGTAANAEVEDMTDTAGALDARVEESAELATNDTCDAAGVGKTVVYSVFVTTRRDEVIKVELVGGRTTELGDGSEDTVELVVLGAKNAAVVLSSGEYVNMGGAKVGTEFDGLVEANVGCDEKTEPSAVARDVDETSSAVLRDRDTSTVEEATDIVFA
>Arab_Me14_ctg01_-_Arab_Me14_ctg01g286t1
MADSQSTTTSAKPRTSSISQVSESSQTAAEFIKEQLSLEAEAREALPYQFDTCTRDLGPLRQSLYACLTCSPPPASAAQVHTPAGVCYSCSISCHGEHTLVELFNKRDFICDCGTTRMPENVPCTLRINAKTGQKGGVTGEEAAKSNKYNQNFKNRFCGCGEDYDAHQEKGTMFQCLGLGTVVEGGCGEDWWHPECLVGFTREEYAKSIEKPEKKDTNGTDVNTDVNVEDKRHEIGIATPILDAAALERSGEDGNDMATAVEQNEDEDTPLPPGFPPEDDFDHFLCYKCVEANPWIKKLAGSPGFLPPVYTQKALNAVQPTETATSALDATNDDSKKRKASDADDDELNNTTLSIPVSAKRQKSENPSTALSSTPEATTVLPTTPKKEDISTCKLVSLPPLPTPALTNSFSLFLKPDFRDHLCRCASCFPLLKPHPQLLEEEDTYEPPISEDGDEGVQSVGTGSILDRGEAAFNNMDRVRAIQGAMAYAQLKDKVSAFLKPFAESGKAVGAEDVKAYFEKLRGDEQGIQEAAVGAKTSKSDEDGDAGADGNTRKEQSGY
>Arab_Me14_ctg01_-_Arab_Me14_ctg01g287t1
MSSPLRSNMSSANRGAGPSRNRNKRSRDDELSSSAALPPSSPMASSPPMLPQDEDADMLDEDDIIRDVDDLDEEAEEAEGIDLFADDFENDYSRRENDAYEGEGIDDEGEYDELTLDQRRELERRLNARDREARRRMPAAFLPDDDDQDGLADLMGQGRRRVRRHRYDEDQDDMDMGDDIMNEELTLEALTDVKANNLTDWVAQPQVARTIAREFKSFLTEYTDENGTSVYGTRIRTLGEVNAESLEVSFDHLAESKATLAYWLANTPTEMLKIFDQVSMEVVLLHYPDYERIHNEIHVRITDVPVQYTLRQLRQSHLNSLVRVSGVVTRRSGVFPQLKYVKFDCTKCGTTLGPFHQDSNVEVKISFCQNCQSRGPFTVNSERTVYRNYQKLTLQESPGTVPAGRLPRHREVILLWDLIDSAKPGEEIEVTGIYRNNYDAALNNKNGFPVFATILEANYVVKSHDQLAGFRLTDEDEREIRRLAKDPKIVDKVIDSIAPSIYGHTDIKTAVALSLFGGVSKEAAGRHSIRGDINVLLLGDPGTAKSQILKYVEKTAHRAVFATGQGASAVGLTASVRRDPMTSEWTLEGGALVLADKGTCLIDEFDKMNDQDRTSIHEAMEQQTISISKAGIVTTLQARCAIVAAANPIGGRYNSTIPFSQNVELTEPILSRFDILCVVRDTVDPKEDERLAKFVVNSHGRAHPHVNSAYGYSDKAKATQNGENGEGMEVDEMETSRKESEIPQELLRKYILYAREKCRPKLYQIDQDKVARLFADMRRESMATGAYPITVRHLEAILRIAEAFCKMRLSDYCSSQDIDRAIAVTVDSFVGSQKVSAKKALARSFAKYTLNRPGAVRAPARAGRNAQRAAA
>Arab_Me14_ctg01_-_Arab_Me14_ctg01g288t1
MPNLRSIYGWRTGDDESEPDPETNVFAKLVSRSCPVEYIELRAPKLNMVNFRLLLGATIPGKLKTFNYEVGCTWAWCLTEHPKIMASLQLHHDTLESLGLSHEYYYPYEMGDESDKPSPCSFTPFVAIKRLKVAPVYVWGHLGFTDKARLKSLEAEEMLWKALPRNLEQL
>Arab_Me14_ctg01_-_Arab_Me14_ctg01g289t1
MAPKKSKRTADSINSRLALVMKSGKVTLGYKSTLKTLRSGKAKLVIIAGNTPPLRKSELEYYAMLSKTSVHHFSGNNIELGTACGKLFRCSTMAILDAGDSDILTTSTEN
>Arab_Me14_ctg01_-_Arab_Me14_ctg01g290t1
MARRPARCYRYCKNKPYPKSRFNRGVPDAKIRIFDLGRKKASVDDFPLCVHLVSNEYEQLSSEALEAARICANKYLVKIAGKEGFHLRVRVHPYHVVRINKMLSCAGADRLQTGMRGAFGKPNGLVARVNIGQILLSVRTRDTHRATALEALRRCQYKFPGRQKIIVSKNWGFTPLKRDEYVEKRREGKIRIDGAYVQFLRTKGPLDYNMRRFPEAFEQEA
>Arab_Me14_ctg01_-_Arab_Me14_ctg01g291t1
MMASNLLSRFLPSATDEPFEDDPLNPQPRRSSASTDGQRDMDIDEENFGAYFEPQDLEHLLEEASGSQMTTDSRAVSPEARRKPNAPPGINTANRAAGWKQPGPARPLPLDDDDDVPQSLLLEGGPLSPHATRRTDGLPPPVPGPSTRQTRAQWNTTQRQQQLHADMAGAPASTWARAAHFNINPKEKALWMWVNQTDLDTYMKDVYEYYRGHGIYSMLLKRILTLLQSAFVVGFMTFMGWCIDYSKLSQSHKTSEVLVPKCTSRIHGFWIFAIWIFSSYWIYSFYTMVTDIPRLRAMHDFYHHLLDIPDRDIQTVEWQQVVSRIMALRDLNLATASNLSPETRKLLDSKSRQRLDAIDIASRLMRRENYLIALFNKEVLDVTVPIPFLGNRYIFSETTRWHVELAILEFVFSGKNGQFNPEFLKERNRRELVKRLRTRLMGVGLISVVCAPFAVVFVLASYLFKYFAEYHKDPGQLSNRDFTHFAQWKFREFNELPHLFERRHKMAQPYANMYLAQFPKDKTEQISSFIAFITGAFAFVLVALTLLDSEQFLTFEITPGKTAIFWIGVFTAVYRSARGSSPQEDQISDPAFYLGHVIYHTRYEPESWTDRLHTDEVRTEFAKLYQPKILIFAEEILSMVITPFLLIFRLPNCSERIVDFFREFSIVVDGLGVTCSYSMFPFNKGTQNRTNNIPTSQPGGTRTNDPTSDPREDYFMAKDNKMLASYYGFLDTYANSNGKGYNNRLQGRSTFHPPPQFPNAFGNMSQSAQPGDAGPQARGTSRGPAARQPQHLQRRTPRNPARDEPMSSMLLDPQHQPSASALRNPSRGASHGRYQSRLHNVVSPTGHPGSRIEEESTIGDSWRTSRLAQDDDDEDEAPGAGRGGVLQLLQQFSKAQAEGRGAGVGV
>Arab_Me14_ctg01_-_Arab_Me14_ctg01g292t1
MSTSYFQERSTPASQTGMSPASPQVGAGSRGVNALSSRITSVLSASYADLEIRGALETIDERNIQNTAETRRQIRLDVQKDVIECNGEIVKDFGQVAEQLRRIGAAITSLNSSCADMRAHISTAARETGPVLEEATSLINQRKQIETKHQILNAFSSHFRITEEQATVLTSTAEPVNEEFFQVLTRVKKIHHDCQVLLGTEDQRLGLEILEQSSKQLNGAFQKLYRWIQHEFKTLDLENPQISASVRRSLRVLAERPTLFQSCLDSFAEAREAILSDSFHAALTGSNSGTSHIATKPIEFYAHDPLRYVGDMLAWAHSATVSEREALEVLFVSDGDEISRSIQAGLESEPWLKGEGEQEVFDGKKALNQLVSRDLTGVARLLRQKTEQVIQSHEDATLAYKIANLIGFYKGTFLKLLGQDSDVLALFDTLQASAMRQFRANMRDHVATVQSELAVAPADLSPPDFLEEALQTLKVLAKSYDTSVTALNESSSDFEAVLAEALDPFLGGCVNLQKGMEQPNGAIFAINCLLAVKEALSGFKFAAERVAEMGETIDEHVAALVDYQHQYLIHESGLITLHEALSAVSDAPESLGTIPQLAAFKPEALVSTSQQLDEFLPSALIDAAENLKLLRNRTTVQQVTEEAAAKFCEDFEFVERKIVAADELLYDEDDEEAEPGLRDLFPRTSGEIRVLLS
>Arab_Me14_ctg01_-_Arab_Me14_ctg01g293t1
MSARVFLAYAHSYPKALADNAWDNTGLLLEAPFVPSRRQSNTVLLTIDLTRAVADEAIALNSSIVIAYHPIIFRGLKSLTLANSQQQTLLRLASHGISVYSPHTAVDAAPGGLGDWLADIVTGTKTSYDASPSAAVTPALQTEGSHDSFVQKGAATLSVQRPTFQLQHHPSQTTLRLSKDPPKTTSIPHTRRPVVPQSPEIKTHPGAGMGRIVEFHDAQALPTLLDRIGKGLNNPKGFPIAIPQDATIADIKIRSVGICAGSGGSLLANLDVDLLFTGEMSHHEALAAIEKGQVVISLFHSNSERGFLAEVLREQLEDTIEGEWQAVRDEDKGDESLEEALADDGFEVAVSQVDRDPYGIVVLKGDAEEDS
>Arab_Me14_ctg01_-_Arab_Me14_ctg01g294t1
MGASQKTAMDPRHKLSKSLDQLFVDPANPTIMSARTDDEAARNAASSGVTPEALKQKLKSSLGATHVEIEDMSGGCGQMFEAIIVSPQFTKKTTLARHRLVNAALKEEIAAIHAWTPKCHTPEEWEKKKPQ
>Arab_Me14_ctg01_-_Arab_Me14_ctg01g295t1
MPWYHVAEPNSYLVVTGVGIEKVKIQKKAFVYPFQKVSKISITPFDFSMSLQAMTLEKLNFSLPAVFTIGPADDMLSLEKYAVLLTGESDGRPTANANKGVVAVAGSEGRSHVQDIVKGIIEGETRGIVSTMTMEELFRERKVFKDKVIQSVQSELDQFGLCIYNANVKELQDTPGSEYFAFLSRKAHEGALNQAKVDVADARMKGEVGEAEKQGKTKQEVAKIHAATAVLETERKAEKATADAKLTNIEIEIGNKLNIARINAKREAEQRDAELNTEVEKAKGYMELEHLRATKVVQARIEKESSQQKADAELYAQQRGAEGLKFSEQADAEAAAYRRLQDAEADFKAKEREAEASFFAETRKAEADYFRREREAQAHLITQQREAEGLSAMAKAYGEMATVLGGPQGLMQWMMLSNGTYQQLANANAKAIQGLQPKINVWNTGAQGGEGAAMDATAPIRNLFQSLPPLLSTIHDQTGMAPPAWLAQMPQSQEFDPKKFALRNGSETP
>Arab_Me14_ctg01_-_Arab_Me14_ctg01g296t1
MSQNEKNERPPSYSEVPNFSRPNAHRGQQILDQLTLTRAHHIQAVIDTHIIPLVEQRASYGIAQTTIAMLPSDIPLPAVREKSEFSFDTDTSKAVEVIGFASEEEPNIVRLEGQMNRTEFWRVQAVIVELERVLRDSLNASPQLRSPLRERSEFETPQKQKRNFLAKFVGKGEEERSPSGNPEVGVKKMDESGLVLVKARLEEISLRTLSDFGLYDTMSKQCVIIRIDARC
>Arab_Me14_ctg01_-_Arab_Me14_ctg01g297t1
MPSVESTPVSRAGITTSATGERHIPSSVRPDGSVRKEIRVRPGYRPPEDVELYKNRTAEGFRNRGKAGVPGAEALKKEEDPAKTGNAANKNAKRREARKKAAADKDEETPAAPAKSAEPVEPVEPAKPVDPEAEKEKEAKKLVKKLRQARELKDKKEKGEGLLPEQFEKVIKINELVRQLEKLGFDAQGEKKPAET
>Arab_Me14_ctg01_-_Arab_Me14_ctg01g298t1
MAGVSQLENPWGHAPANPTVIRSNVTLLGTVFAAAFGMQLAFDTGSERIWDNINRGRQWKDIKQRYIEAAEDDE
>Arab_Me14_ctg01_-_Arab_Me14_ctg01g299t1
MQEAERRKQNAGSRTQEAERRKQNAGSRTQEAERRKQNAGSRTQEAERRKQNAGSRTQEAERRKQNAGSRTQEAERRTWLQNQHRLVVGADVICLSLYKVLRQAGCSYRGRGDFLMHGCYDIALELSPACSPACLPDNATVLRPTPDSTSPKLWQDHDLTNSNCLLLTRITVSLTRTSTASPTTPPPPPPPPPPSTLHPLEFGCAMYISPLEQELCRNLRELPRRHNYRFTPEADRDLRAILFRSLAGHNAHLPLFFPSGLPTDREQPWSLRDAQGAVEGAEYTAAAKGKPCGHIFKNGEATYRCKTCTDDDTCVLCARCFDASDHDGHHVMVSVSPGNSGCCDCGDDEAWKRPVHCNIHSVDAESSNKAAGKAKEGPSLPDELLESMRTTIARALDYLIDVFSCSPEQLRLPKTEESILQDERNSRLTSKWYDPGDQPEEAQEYCLVLWNDEKHTVNDVQEQVARACKQKQAFGLAKAHEVNDVGRSAVVYRSDLKELLRMAKIIEEIKLTVTIRSARDTFREMMGGAIVDWISDIAGCSAGDDHQVLRRTVCEEMLKPWRIGSAASNESIGKDGLDDHELEDRENEEMSFFRGLMPIQRRAQIIRIRRQRTADRTDDTTASDDEFDDGDDEGEGTADAGEEMDIDEVGAQDNDGDVEMEAFESADEALETSEATMAGYPAPPPPPPPPPPPLPQSTAGQRLQNEQSDTPAESDSEPLMTVPGTPHTRSLPLRPSRPPQYWLEKPEGYGRRPGTPAHEDLWQRLRLDRLILYDLRMWKQLRIGIRDVFISTVVSIPEFKRLLGLRFAGVYTALAQLFLIADREPDHSIINLSLQMLTTPSITSEVVERGNFLTNLFAILYTFLTTRQVGYPANVDPKATLAFEQGAVTNRRLHHFFMDTKYLLASEFVQDKIREHPRYLSQFLDLVKLHQGICPNQRAIGEHLEFESEAWISASLITREINKLCRHFADSFTWRNEEDATNICRAIRTTAEVVTINSLGAERKRFDQTELKDETRFKTLEVFEFDAEPSTFFGPQYKVVDFVVAKEHLSFHHALHYTLSWLIDRARSMPSEHVRQLLLFTRDELQIRANSIAISSHRPEDYLLAVFDFPLRVCAWLAQMRAGIWVRNGITLRHQMTQYRGVSQRDVCHQRDLFLLQSALVLCDPSVFLASMIDRFGLNGWMTGKYEASQHGFEDTQAVDVVEDFVHLLIILLSDRTCLIPAGKNGGSHLSAMRRDIAHVLCFKPLSFSDMTARLSDRIQNMDEFSDVLHEMTRFRAPEGLSDSGTFELKEQYLDLIDPYVHQYNRNQREEAENIYKNYKAKKTGKLASNIVFEPSLQPVMSGLFQNIAGFTRTPLFTQVMYYLLGYGLKVAVATPNIPATRVETYTQFVLQLLLVAILEDKSEQHDWSEEMPDSFVASILTKSANVGIAEHPTILSLLLALQEKEEYKSCESKITLILHRLKQRQQHKFIIAAAALNVPTDRMDTASPASFGLEEKELKKQQALDRQARVMAAFKEQQGKFMANQDFDWGEDDFSDLEDEDGGLVAEEKTFKYPSGTCILCQEETNDQKLYGTFGYVSESRILRQTDLQDDDWVDEVTQTPTSLDRSADEVRPFGVSGKNRQTVEKVNAGGERVATERQTLGKGFPRAHVKSGPVSTGCGHIMHYTCFEVYLQATQRRHVGQIARNHPERPEFKEFMCPLCKALGNMFLPIIWKPKKILHPGALETTTSFDDWLETRVATIHKNFEDDRGKASAAELGQDRKNLYEYGQHDFVQSIAGHLQELVRSPVFPPPAQPAAAAHRFQIPAFLGGAPREAEPEPAPPATQITELFKVYQRLRDTFRSNDIQSAFTHLPMPGADIEDLTHTDSLAQALGHSISAVEIAQRGVQSDFVRGTLIDKIPSQTLTHLQILSETVTSYVTIGSLGNRGSSLTGIEYLRTQYEQIRQLFVGHPGVFDPEVLPLDLKTVTPLLCHDPFVFLTQCAAGIVPATDLDIHHILRMCYLSEMVRVVLAYTKTTEGEQNAPHFQQPERFINSDKVSGGLFSPGQLNSLLFFVCAVYNVASMDDAPALLDIDNMPIPDQFKHPDFLYFMHTMISSYALPFLRKAAILMHVRYGIELPHISMDQVDESELSRLTTLLRLPSLHELFSSFAARSSSGYITRSIVGGWVRHLLWAQAGNQPLRPTISLSHPAIFELVGLPKTYDMLTDEAIRRKCPTTGKELTDPALCLFCGEIMCSQAVCCMTGKGQRGGCNQHLAKCGGQIGIFIHIRKCMVLFLNKNHGTWAVAPYLDKHGEVDPTLRRHQQLFLNQKRYDALLRKVWLDGGIQSLIARKLEGDINNGGWETL
>Arab_Me14_ctg01_-_Arab_Me14_ctg01g300t1
MSACSSTLRALSRSRIPTTKTLLPFLYQTATIQQWKPAAQPIARRNISRYSRPDDAAAVEDIPFEDKDDLPPALDDLEPARKTTITGSERAAFEKLYRKFNARGSRQDEKDHEVEIDAIADEYWEPDDEDNPANLDKIFDEALKGNPNLAREWNRSSTEQLKSRKPRQDLQTMAQHILRGTRPPEMKRAEMRAVRKKDVSAKAAKLNEARVRERTRVDDLLKSAKTDRDLWDVLHREVFDLIRQLDLDGTNKPTPRKSRTPKSTNTTTDPKILFANYPHHLLTALTTLRTHFPASPLPLSILPTMKSLGRSSYALGATTALYTQLLRTAWLQQSSYPLLVSLLTDMHNGAIEFSVDTLHLLDQVIKEFDMARSGRLGREMQMVYGMDQFGEGIREVRRWRQIVASRVGVDDERREKGTVPVSRRRRAGDEDSSDHVPLVEGVNGALEPFQSHSQPRPADADVEFGFLGQDSAAEAPEAKEPIKSMPTADMETANNEAHDTVESKLEIEAADDANQEHDKSAASAEAAAKTSSGEFVPWTPS
>Arab_Me14_ctg01_-_Arab_Me14_ctg01g301t1
MSSFQAVNTTLTVPEPPPARSGEETTPTTPRPDPRFHKDSKRGDETRAEDPSLKTPTRNSFIGIAGQRPLPSSPFTPSRELSETPSTKSNLSRGQSYTSTQSVDAAEDVQMGDGDEDDDKDASDNESATSESGRPSKKKKGQRFFCTEFPPCNLSFTRSEHLARHIRKHTGERPFQCHCSRRFSRLDNLRQHAQTVHVNEDIPAESLAATGTRFQRQIRTDRVRPPGPRSRANTLGSMGGHSRGHSRNLSTSSITSTISAMSVAQSPDSRRRPPPLAMASDDSARARLSLQTMEAYNPPLMGSPGPQIVEYDSQSNAPTTPTSATYSTVAGSPAHFGSAIQSPASTSSRPVSWAGPPPGRRLSNSNPFSGPPGQVPPPYMSPLQSSAASTFSTQSSVYGSPVVSSFPGQRRESNADADWRRRTWHPGTYTGPRPATSGLGYHQTPDADRPSYTSQPAASQTRLPGIESFDYAPPPLALSRPQQGPVHIEAPQRPLTYHAPIEPLPGVGHRKRMSVSWEDTMQRGINRLDITGSASPRESWSQYPPNGQPATTRPMTAPHGYFSHQQPSHVPQPLQIHPAELERNPQELPATPRRNKRQAWYNGPVSQPAGQPVTQPVRAIQRTSPEDSSSSEGVPTPGNTTMSEYHPAIVHSNGFVEAHPPGTHVDEYKPAASIMDRPHPLHTGYQSYHRHTLSNSSSSSTYRPQREPERAPTTLGQPSPPAGVHDMRRLDALVAVATGEHQAVENRS
>Arab_Me14_ctg01_-_Arab_Me14_ctg01g302t1
MADRKKRDRYAGAAYEFGANAGLNAGGAAPPPQPAIPGYGATAPGYGAPAPGYGAAPVQGYGQPVPGYQAAPSYGQPAAQDPNALSQQFGQMGLGPQQGQAVPQQQQQQQQQATAASQNQLFPSDLIAQPFHVSELYNPPPPINLPANAAATPSEFANESSKYLRCTLNTIPTNHSLLKKSKLPFALVISPYASLHDSEDPVPVVHDQVISRCRRCRAYINPFVSFLDHGHRWRCNMCNLTNDVPQAFDWDAAQQKSVDRWQRPELNYAVTEFVAPQEYMVRPPQPLCYYILLDCTQASVNSGLLAVVSRVIKEALERIPNADGRTRIGFMAVDSSLHFFSIPPDGSENNDTHQLVVSDLDEPYLPMPTDLLVSLSQCRNNIENFLDRLPAMFQNTHIPGFALGSALRSAHKLISPLGGKITVIGASLPNVGHAALTPREDKSLLGTGKEASLLQPANNWYKSFAVECSKNQVSVDMFLFSSQYQDVATLSNLPRFTAGQTYFYPGWNAARQEDVMKIAKELADYLSAEIGLEAVLRVRATTGLRMSAFYGNFFNRSSDLCAFPAYPRDQAVVIEVAIDETISKPFACLQAAVLHTTSSGQRRIRVLTLAVPTTENLANVYASADAQAITTYFTHKAAERALSSGLDAARDALQGKIIEILQTYRKELAGGSMGGGGLQLPQNLRALPILFLGLIKNVGLRKSAQIPSDLRSAALDLLSTLPLRLLVQYIYPAFYSLHDMPDDAGIPDPTTGHITMPPLMNLTSQSIVPYGLYLLDDGVNQFLWVGRDTVPALLGDVFGVEDRTQLKQGKASLPAIDNDFSERVRAVVEKSGDHKSKGVGSIVQPSLYIIKEDGEPSLKLWAQTLLVEDRADQGESIVQWISKLREKVVQ
>Arab_Me14_ctg01_-_Arab_Me14_ctg01g303t1
MASLRGTQQPELSKKLYKIIKTENHVIGAHEVAARERVGVARQLSEWGEATEDETISEVSDKLGVLMAEIAEQEDLYAQALEDYRGVLKQIRNTESSVQPSRDHKAKISDEIAKLKYKEPQSTKIVQLEQELVRAEAQSLVAEAQLTNITRQKFKEAYDHHFAATIERAEKQIILAKHARRLLNLVDDTPVVPGDLHPPFAGTEEARQVLNDAEDDLRNYELHVEPIHSNSGNLGVGAMPGAPIGGAGTTLAQDTTQYQDDVGTVEDGRHAESSVQGTDAGSQPPYPVSEAERLEQRQATEMTSQPQPTAFQHVA
>Arab_Me14_ctg01_-_Arab_Me14_ctg01g304t1
MVKSGLIAAFAAYAHVTQAACPFMDNDARDVPASHPQVKRADGSYDVPSNTNEFMSRFEVNDTGVYMTSNSGTPIEDQESLSAGERGPTLLEDFIFREKIMHFDHERVPERAVHARGAGAHGVFTSYGDWSNITGASFLSTPDKETPVFIRFSTVAGSRGSADTVRDVHGFAVRFYTDEGNFDVVGNNIPVFFIQDAIKFPDLIHAVKPRPDNEIPQAATAHDSAWDFFSQQPSSLHTLFWAMSGHGTIRSFRHTDGWGVHTFRFVTDEGKTKLVKFRFRTLQGKASLLWEEAQVTAGMNADFNRQDLFDSIENGLFPEWVFEAQIMEEDDQLRWGFDLLDPTKIVPEDIVPFTPLGKLTLNRNPRNYFAETEQIMYQVGHVVRGIDFTEDPLLQGRLFSYLDTQLNRHNGPNFEQLPINQPRVPVHNNQRDGAGQMYIPLNTAAYSPNTLNAGSPKQATQKEGRGFFTAPNRSTGGRLVRAVSSTFADVWSQPRLFFNSLLPVEQQFVVNAIRFETAQLKSDVVKKNVLIQLNRVSHDVAVRVAEAIGMTAPDADDTYYHDNTTTGVSVSEAPLLKIDGLKVGFLTSNSASSDTASSLKTALKEVNVGFTVVAEHLGEGIDQTYSATSAVQFDAIVVDGSASTLFAAPGNLANTNSTASNTTSSWRSTLFPAGRPLQIVQEGYKWGKPVGVVGTGSEVFSAAGVEAGTPGVYAFGTNGTASIVDQLSEGLKTFKFLDRYPLDN
>Arab_Me14_ctg01_-_Arab_Me14_ctg01g305t1
MATIKQHHSLLHRHHSERSKEHVGPGPNVFDGTDAVTAHKKVAVSRVVEAYDALRAENRSSSPTAEQSTPEDPFAFESLVVSLPNGEVRTFKYLLRKWDSNQHPDPEFEEAVTSWRPQFEEAATKHFFRRIALWNESEEIMLAAKQQKAMELKNGRRRDRAISMSKMWSRERGRALDNEGSVRDELKQVATREGLAQLLWTLLNDQTQPLCPELFEVCKEAVKAKYSIHTIGGTQ
>Arab_Me14_ctg01_-_Arab_Me14_ctg01g306t1
MPFLTISNKKIHYADLKPEGKDVLETFIFMHGLGSSQNYYHAVAERLRANGFRCIIFDNTGAGRSPYTGTGSSIQSLGDDVIGILDALEVPKAVVVGHSMGGIVVAHLAAERSDRVVAAILIGPVYPNEGAVPVFEKRIEAVQKDGMQPMADTVPQAAVGSKASPLASAFIRELLLGQDPAGYCSNCRVIINAKPPSYSKISIPILILAGEEDKSAPLEGCKKMFEEMGTSEKRLEVMKGVGHWHCLEAFEEVAKLIEGFYHEIQ
>Arab_Me14_ctg01_-_Arab_Me14_ctg01g307t1
MNRTDSGFVESLLSQPSNGQTTPLHRSNTAPHRRRTAKAAPSSVETSDVINMSTHRPASEKRPRPSNHRSASSSENSTARSRSKGRGHDSKLSSRRTSFTIVDPSRPARHYRVKSSQPLSPASQDVDDVLALHFRSCSLFSNPSYQTNSALPSPTLSHQDNFGFSNAAPRFSMDEMAMVEEHASPQETESACVQIPTTTTHWISPNTRKRDYERIDRANTGLRGLVRRVVPRCVSGPPERFYEKDQSDAGSVRRYRLDVIESRINEKDIIRLPAHASERPKLKSRWTCF
>Arab_Me14_ctg01_-_Arab_Me14_ctg01g308t1
MSEQLTTKQVAEHNTVEKGLYIIVDQDVYKLDSFVEEHPGGAKILKRVGGKDASKQFWKYHNESVLKKYGPKLKVGTVKEEAKL
>Arab_Me14_ctg01_-_Arab_Me14_ctg01g309t1
MSELKITLIGTGTIGLSFAAFHLAHLASSSQLTIYDTRPDASQYVQNNLPRFFNHQDPSSLPSFSDVKIATSLQDAVKGANIVQESGPENLPFKLDLWSEVEKHAPNDALLWSSTSGIPASQQSGKMQNKSRLLVVHPYNPPHIMPLLELVPSPETSDEVIERTQEFWRAQGRVPIHIKKETTGFVANRLAFALLREAVHLVDQGVVSVEEIDSIVTNSMGPRWAVAGPFKSYHAGGGPTGLEGFFKNIGGTVQECWADAGTPNVGDGWEEKVFRQAKEVYGTVNVGERDRITRRILQVLEEEKKDAGNARSD
>Arab_Me14_ctg01_-_Arab_Me14_ctg01g310t1
MVIFKSRQPPIDLPAHLTDWDWLFDSSYSPLSKFPPNELAGFQNAITKERVNWADVKKYSTFISTALVKKYGLKTGETVSLFGQNTVWYPVAMFAGLRVGAKISGASPAYNVEEMTFALKTADSKFLLTTPGSMEVASASAKAAGLPQSNIFLLEGELPGYTTVQELIRIGQSYGEDGQSPTFKIPPGKKNKDVCGFLSFSSGTTGLPKAVMISHQNVIAQCLQIQQITPETQKKIMAVLPLFHITGLVHQMHLPILLNAEVIMLPQFTMEGMLNTIVEYKLGELLLVPPILIRLVRDPIVDKYDLSHITRFSSGAAPLSEEVIQLLRKKFPSTGFKQGYGMTESCSCITAHPPEKFDYKYAHSGGAIVASTEVKIIKPDGTEAGFNEDGEVLARGPQIVMGYLNNAKATAETFDADGFLHTGDQGSIDEENMIHISDRIKELIKVKGIGVAPAELEDLLLGHAKVEDVAVMSVPDEYSGELPKAYISLKPGIEESAAVGKEIIAYVKEKKVRYKWLNQVEFVSLAVRVETLIQPLSQSDQIKEIPKSPSGKILRRVLRDKEKASTFGLVIKDEARPKL
>Arab_Me14_ctg01_-_Arab_Me14_ctg01g311t1
MSDEKQPSANLIRMWRVWRTTKEMMNDRGYQVLEDDMNMPLDEFASKYGRADGEPDRSRLNFSCQPGEEMLLKYTMPPTKKDPEPRPQIGTIWVEFNSDENVGLKQLRDYMQHLVNGAFYSGIMVTVKPMTGMAIRLLRGSASLSEGPKGGVEVFVEQDLLVNITKHELVPKHVLLSEEEKQQLLKRYRLKATQLPRIQSTDPVAKFLGLKRGSVVKIIRKSETAGRYASYRWVI
>Arab_Me14_ctg01_-_Arab_Me14_ctg01g312t1
MTSSNHIPNLRTLLGPGRGGGLRGRGRGGGGPGSSSDEARDNAVKGTDQDAAGSRLSCVELGYLHDPYARLFAVQPSTRRLPLLNRGSYVRTTAIDMLVAKFLLTHPSAPKQIVSLGAGTDTRFFRLLDAYPDSRLIYHEIDFPTNTLPKIACIQRQPVLHRRLLQIPNTSTSYHSATYNIHALDLRSLAAPSDDAPLPDLPNLDPTLPTLILSEMCLVYLQPSTAQSIISTFTTHYLQPTTPAALVLYEPILPQDAFGRTMISNLQTRNIHLPNLTSYPELGDQRARLTGYGFREGAKAADTNFIWKHWVSEEEKERVASLEMLDELEELELLLKHYCFAWGWRDGQSDVFSKAWADMLEQT
>Arab_Me14_ctg01_-_Arab_Me14_ctg01g313t1
MAFGKANQPSFNLFTGVEESPPPEPLRQTFRTTMRASTMTNAPHTVVPDNPVNEDLRAQLNTLRYELETAKQEKAMLKLELDQEIRDAQSRAEADFRKAQQAEATNSQTAKKYEALSKELSEVQTRAANERQDLERRLRQSQEKAQSLQEDYDEVKDDLATSQRQNEHKYNNLQTEHQRLKDSVEDVQTDLVSKVNALQAAQKKLGEREEEVGQLEAEVLRLKAISGDAETLTIIKRELSDQVAHIQKLEALTREQNAELRNFRKQHKAIEVVEEEKRSLQTKLRMMDDLQRQLGEAEMRRQVLEEERDSWTSYLESEGNEDSELQFETPEDLARAFIQERIDKTDLLNKLGEIKPELTVKEANVQALEDEKAKLQAEIQQLKSSATTNIAPNAKEAQARARLERQKALATKEVEFLRAQVKAFDDEAREMQPDSYDAAKSQRIAELEALVDEHRKELDTLQKEFNSIEKLTPTPTTGQKRPLDTTDDNDERVGELRRKNRQLTDDLSALQKRMKLIETEYKAQHSQLKKLKESSRTRVLELKSNPTADAEALKLSTVRTLRSANAQLLAQLEQAQPPPKTVPFATFEAAHDEMEELRHALASSEKKQTRLKQIWAAKSLEFREAVASILGWKLDFMPNGRVKVTSMFKPADDEGENSIVFDGENGTMKVSGGEQSVFAGEIRDQIVYWVEGRKEIPCFLAALTLEFWERGPGAEMTMKL
>Arab_Me14_ctg01_-_Arab_Me14_ctg01g314t1
MLIRTLTSLPTFTAVAGALPYSFVLDVDSIDGAAIDGPPSAPLLLTTTEAFGSPTTALSPFPTSIVSMLAYAPVRPAIVTTTGVGNTTLTTCLPTTVITITLPNPTPRPTTGSERSDDRDTSSNDENSLTDNDSDDAATPFDTSTPEPLSAWPHWFTAATFTLVFYDAITLGLFVWLWVFGYLWWFGRGRETRMGGWVRRGAVSESMEMAPTLDRHGRYERTSEWVGSGRSRYGRARSRSWERARSLREAELESEMRRLGMI
>Arab_Me14_ctg01_-_Arab_Me14_ctg01g315t1
MASLRSVCRVPLSQLARRTAATNHPRLLQRQWRGYATSLEAQQKVLSQDLEDADPTVYKIIEQEKKRQKHFINLIPSENFTSQAVLDALGSVMQNKYSEGYPGQRYYGGNEFIDQAERLCQERALKAFNLSPEEWGVNVQPLSGSPANLYAYSAVMNVHDRILALDLPHGGHLSHGYQIPGKKISAISKYFETLPYRLNEKTGIIDYEKMAELAHLYRPKVIVAGTSAYSRLIEYERMRKLADEVGAYLLSDMAHISGLVAAGVIPSPFPHSDIVTTTTHKSLRGPRGAMIFFRKGTRRVDKKGNKELYDLEGPINSSVFPGHQGGPHNHTITALAVALQQAQSKEFKEYQQQVLDNAQAFAKRLGDAKENGGLGYNVVSGGTDNHLVLIDLKDRGVDGARVERILELVGVASNKNTVPGDKSALKPGGLRMGTPAMTTRGFQPEDFKRVADVVHRAVGITQKLDKDAKKKAEETGRKNPGSVAAFKEYVGEGDDITDILELRKEVEGWVGTFALPWDKES
>Arab_Me14_ctg01_-_Arab_Me14_ctg01g316t1
MADIAFSKIDDSFTDSYKLQALFDADQLDQCIKDATALLDDPAMPRYHQECCVGAKTYWRIERARYNKGQSEVVDKALCELRTILDDLQNALAEEWKVVHKADVPCDPEKKLEKADEDVMEQEVAIRGRWEPPKVELNSPDNKA
>Arab_Me14_ctg01_-_Arab_Me14_ctg01g317t1
MALSTPKKSISAPMPLLARQESSPELGSPSKVTQYNKQTGRPVRRSAGKMKPVAGYVDSSILEEEDFIPCTSGDDSEEEDDETSATPRGRADKTKRKRKRSPSPPSPRLDPIIYSQQLDELTDDETGGAFHRRIPKKPPLTLRFNVPLGYHGPLLIKLDPAMLRLDDETASKKMHQSKKCRADAPVAHAKLSERPKGFTDLPPELRNKVYRYAFVRDKSFQIPACKPWGSANLCQSAQFLGTCKLVHNEGCSVLYGENTFAFERHESTRGTFYEHEPREIGYQDALQFFKMIGPENLQYLRDLKIAFNDARPSDTPRAHSNEDRRYMTDDVLINCLRILRHAKLRKLSLAFMGRRHLHRSDVKFLGYLEQIKTDELEKWSQPRGYHPEQKIRHTVWFELTEQMIRKNKLYDTE
>Arab_Me14_ctg01_-_Arab_Me14_ctg01g318t1
MVEQQSQNAGPVSADLPPAMAEIKSHSVDQVMAEMNRMPLFMTTLDETDGEGGENMMLEALKAIAYEGTRYEIAENFRQQGNECARAKQWTDAKEFYDKAIAALKGPQSKPDPEADAEGGKVIEVQVDEEEEANKEKVVEEACYVNRALCNLEKKNYRSCINDCASTLRLNPSNVKACYRSATACLALDKLTEAKDACEFGLRLDASNAPLVALATKIQKRADYVAAVEKARVAREEKAASERATLALALKARNIAVRTTTDEAPDLEDASIALANPLDPSSPLSFPVLLLYPAHSQSDFVKAFNEHQTLPEHLEYIFPLPWDEENEYTVDGVEAYMETAVGGLIKVGKKMALHKVLGSGKVVISDGLVRISLVPKGKSAAWIEEFKKRRGTAA
>Arab_Me14_ctg01_-_Arab_Me14_ctg01g319t1
MATDYFSDHEAFISSQPLPSPADTPYMSSRRTSRYGTPASEIASSPPPLPPNPYPESEDDVNNEKISILDPRRFTPTLHANLVSEILNLRRELDSKHKFIEDVETNLHTARTENDSLVKQLSSTAKDGRAAKRQLQNYENEMLAALEEIAAERDKVKEANADLRTKLEAAEKRSRSQDDDSTRVHDMWTREKDVWAGEKRILERRVHISESRLKLLLDELAAHETARADANVESEGEDGKDGGAGAESDTASIHSSPQRRSSTHIGRHSRNLSNSSYRSIGRNYRLSLLSNEGHGRGNGLSLADELIFDEEEEEDLDELELDSDDFPEHEMRARRVLESRQSMYPDNKAKRILGLSNDVQQSNKDTSAIAEEHEHVKLSYETTQSAVTITPREITLIFPPTMPIYVDTGIQPSPPTSPILPTMAEASSQTVDETPLQSKPLDGSPTRTEVEANQRRKRTSLLLESPGPSQSASPTSCTMTSSSVQTIEQPLSPPPTPKIAIPTTELPASPVSPVFKNELASSSTQTEFDGDHAQLFPKTKPAAPPAPISIPSITIHAPDSVPSSPKDARLPPGTKTVATQTANDLAAPMRSYGMQTEPIRVDQRPVRLPPHLLPSAISSKPGTPEPKQERPLVGSGTRKDLHHPGKSYTEQPSAKPTARQDLLILLEKAADTKVENRYPGNNDNGPLSRNHQTEILKRPFRTSSLFAGFDGPSSDEEDYADASGDEYRSQPYTTPMLSSRNAKSGRPVNPPTPVPEDKEVMPTSRISEDSQLSRRVGSERTSLEKSAKITKRNSLSRQPSIRRSAMIQSGTSAHMNPSMSSLGSSTHIQPPFPVPTRSSSRNKPHSKSEGSASPTPGNGSAYANRRMHATKHQRKDSIRKVRSAAPVSRTGRPRSRSPVLPMTPSIPDTESIAPPPSDIMSASGFGHRHQLSTNTAYTASHSVASSNSQASVVDAIAAAMIGEFMWKYVRKRKPFGGPETSTDRATEEASLSSGGVRHRRWVWISPYERAILWSSKQPTSGSALMGKSGRKLTIQSVLDVADNSPAPRNETLFNRSILILTPARALKFTTMSRERHYLWLTALSFLAHSSAPMPDLGAMPQPPPVEDFQHRSGGATLRRSRVQDSVRLAKGRANPVMQRYTARNEPMPSLPSLAGYEGPVPESASPPSIPRGPAHGRKRSSTGPGAPPPSVPFRSFSHQQVPSVYSNGSSDMYSSMQPPSVPSSVYNPTSGVVSSRTSEASTSTRNHFFDAMGTVRMEAFIENALGDPAQRQGLQAKPQGVRHRRSSQWSDSARERPMRAAGLYDIDNDLFHGF
>Arab_Me14_ctg01_-_Arab_Me14_ctg01g320t1
MPSKSPFPDVEIPDLDLWGLIFDSKDRDFSDGKVLYRAIHSNRKYTFADVKAHATAFGEGLCNLWDWQRNEVLALYAPNDIDVPPIIYGTFFAGGIVTPANPGYSADELAYQLENSGARALVTTKAFLKTALEATKKVGIPDDRVIILGAEKDDTHRVKHWTNIRKTSGALRYRRKKAKPEDLAFLAYSSGTTGLPKGVMLTHRNIVADLLQIKGSIGHWYSSKEDRFLGVLPFFHIYGLTGLVRQMLHRGIELVVMPAFDMETFLRTIQEHKITFIYVAPPVIVRLARDKMVDKYDLSSVKMITSGAAPLTKELVDSVHKRLKIRINQAYGLSETSPMTHTQPWDEWYTSVGSVGKMFPNMHAKYMSPDNTELGPGEVGELWLSGPNVFKGYWKNEAATKDSITSDGFFKTGDIGFQDKQHNFYITDRVKELIKYKGFQVAPAELEGKLMDNELVEDVAVIGVQDEHMHTEVPRAYVVAAKSNGEAGENEAKEIVDWIGKKVANHKRLRGGIVFVAEVPKSASGKILRRLLKERSKDDTPLGITSQAKLGSNAQVGSIVKPRQEGRHGQATTRHAHLEADGSKPLGTRNRASPSRPVTTNAQDRGIDSTYTSA
>Arab_Me14_ctg01_-_Arab_Me14_ctg01g321t1
MSSKTAPYEGTTSRAQAQQRAPLPEAEDVPIPTYAEANGYAPPPGPPPATASNVTPRTEVALPPAADELPGYDTIDPKNTTFLLYSTFIHTPNGPAYQLSSALNSNNSPLRIRRLQAAEIPLAHELPIRFDRSQTLYEIQDPPFRDNEYYMVGKKPHCHGGALQLTFGWKTWHIRHIAGPNSAPSEIMTCKKVASGGGLFGKGKAKDGVVVKDGLTEPFEWKDTNGRLLATEGLQLLAGGVVPTLHLSADLDSMWRELMISFWMARLWATFR
>Arab_Me14_ctg01_-_Arab_Me14_ctg01g322t1
MAPSSPILERFRTLLRPRKSERSASKPDINMHEPPSSGLQPDPRSAGAVASQPSNAHLEYQAGGLTSIQSLPAESAAPSQTRRESQFSDLEILHTRLSNAHLLAHHQFELHPAGGVSYKPHVTGPARHGRQPSHSLLPHVQSEPLSSDPLTINIQKSVPVELTQAEKEIFRSLDVPSALCCISRGDEDLHQFFINFGPLNEGAANAVFSIQPGHHDNTASGFLFVAVRDLGNTATAIPSHMVADKVLRVSKGLPKSLRSEVIVDGFMADVRPLFVSPSASTATCQTLKEIDLDKHLMAHLPVVLLDKAMSALKELVPAIRLLSSTAQFGILLPNMSTVAGQNITFEIKPKWLAQSPAAPPDAIRCRTCALQFSRGKGVPNDYICPLRLSNESPACKDDIAWIRRWAENSLSLQFQTDGNANSNQQANLGVLVDHVVAYFTTGDGRTLLLHLKKLQATLDSEGILQRYAHPRDDFNFVYDLRLAMTLRDCSLFVVVPLHEGNITSKLADLDFKSAEKMDDWRDKEAALVDDGWYVKNPEIHNVCLLAGKRLT
>Arab_Me14_ctg01_-_Arab_Me14_ctg01g323t1
MPAPSPLPTYLYKILPSAPPSPLPDRLPLSDLDRQDGFIHLSTSEQVPGTADRFFGNFTELWLLRLKYSVLEAGTDGDGNVNADNKARIQWDEVGHGAFAHFYGGDMGKGNVQEAIKVEKKGTWAESLKLEW
>Arab_Me14_ctg01_-_Arab_Me14_ctg01g324t1
MGGRGRVKRQQVEADDGWTVITHGLSNLTVGNTKGKGKGNGPRHNASQAGAMPAATVDGLTAEKLLLDFNHRTEKWEATACAQHLQDVLAKTEWDVREAVCIGIGSFSRDWEHRHRAMWQLVLFVSVVSHMRKSNVEVKLYAQEPAFTPLDRTFLSLLDVGVCTNDIESHITTHSFVFSPFVDWYILLPMFLKGKEPVLYVGNEILDDYGAFAQSEEKREKLEECNELGKKWLTKRDTVRLRDFEMHPHALNGMVVYWVKDGEGDGVEMEATGQKEAIENEASKTADRTHGKGAEKKPDQETDRKEDAEERSETDD
>Arab_Me14_ctg01_-_Arab_Me14_ctg01g325t1
MASHNSGEFTHGDEKKGAVVHPRDGVQVPIYNDLETASSEDLSIGAILRGTAAKPLNTFEKKAALINVELDKFGLGRYQICIWFLCGFGYFLDLAWSQGVGLVSTAIYQEMNVADADTGTIFACANAGLALGALGFGLAVDIIGRKWAFNLTCLITSIFGLLLAAPKFNYGAICGIYLLASLGLGGNIPIDATIALEFLPQNRRYFVALLSMWQPIGVVAASAIALGTAAKWRCDPKLPSCRAVASGEPCCTVDSNMGWRYNLIILGVMTLVIFCLRYFVFHFHESPKFLLNRGREAEAIEVLHKIAKFNRAPPPTLTIEHLAAIDAMDGVVHQEAPTNLTRAEKNKRVVKGFGTEIARLKGIFTNKLSCLIFVLLGIAYMGDYWSFNLAGSFLPIILLRNNVDNGRGSVVDTYQQYLIIYSPGIIGAALALASIQLPLLGRKWSLVFSAVCQGLAMAMYTQVENTAGYVGLNALEYIMQTYFNAVLYASAPELFDTSYRGSVSGMLSCLGRLAGIVAPYAGSQLLANQSSGILWLGAGGIWLSALMMVFLPVEMRNRQMF
>Arab_Me14_ctg01_-_Arab_Me14_ctg01g326t1
MSDYGDDYSDDGEEWFYVEEEFMAADDLAEHAVASPPPTTYADEDAAEDWDRFDYFNDLEYASDGYDDAAFQTHSLKGAKTGEKRKRHVKPTGSKKRQRSLGDTEASALGMAPIVWRSQTDRGLQPKLLGDDAQTYTVLRDWRKKLRDTPLWARGPSPQSPPVQAAREPESIAEGTSTVEPASPPCEIDVEDEGAPEDETDIDPGALMAVLQSRLAEAGGPLSGMDPQQLLDFAMRMAAGKDAGDDIAGEMADAMLDHGEAGDEEDSAAEANLLSWVAQQRNSGTEPPASAPSSTTTIHSVRQPPTLPNEETGTRASSRTLKASQTVTKSRPQNTSALKRKTCDDDEVEASTKPSKKRATRTFDAPTAASQARTAPPKNTKGGRKK
>Arab_Me14_ctg01_-_Arab_Me14_ctg01g327t1
MRALRKSSHLSRQLVAANGARFHSTTAPAAKALTSVLIANRGEIALRVGRTASEYGVRTTTLYTDPDARSQHALSSPFAVNLGDPSAYLDGDRIIQIAKEQGCQGIHPGYGFLSENPHFAKKCTEAGITFIGPPAQAIEAMGSKSESKNIMTKAGVPCVPGYHGAEQDPEHLKSEAAKIGYPVLLKAVKGGGGKGMRIVNTEQDFFDQLSSAKGEARNSFGDEVMLVEKYITTPRHIEVQVFADSHGNCVALGERDCSIQRRHQKILEESPAPHLPEDIRQDLWEKARQAALAVGYEGAGTVEFIFDNDTGEFFFMEMNTRLQVEHPVTEMVTGTDLVHWQLIVAEGGRLPLTQQEIEQRIKERGHAIEARIYAENPDMNFIPDSGLLLHLRTPIPTPTVRIDSGFVAGDEVSSHYDPMISKLIVQGPTREAAIQKLKTALEQYEVAGPITNIEFIKKMCMSPDFVAGSVETGYIQKHHAELFTPIPPAPEVFGQAALGLALQQVSSSRSDPFSGPPISAAGFGLGFQQRKFDLVETPADGKGDVTSTPVTIRQTAPSKFDITVGSETYADVTSTFSPSSNILTTYYPHTRLSTTFIRDEDRLTLFQQGKQYRLQLAMPKWAEKALGIKDVTNSVLAPMPCKVLRVEIEEGQEVKKDQPLVVIESMKMETVIRSPMDGVIKKIIHGKGDLCKAGTALVEFEEVEAAS
>Arab_Me14_ctg01_-_Arab_Me14_ctg01g328t1
MRLHISPPSTTKTAKHHQRRTPDPPPEPHPEPHHPLSTHPPSPLPDATARQAKPALLEQNAPTHPVRAEAHPTTTLPPPHPPRERIGQGSAGTRARSKATGKKHGPVIFPDRGALNTTLVLRMTSSVHALVRSSRRRCGDCVGWVWLLGIEGVFLGSAWVGRD
>Arab_Me14_ctg01_-_Arab_Me14_ctg01g329t1
MSLSHAPDRARKYKEAPAPVASQKMVSRLCFPASSSSHTLASPHPYDRPFCTRPGSGTGTALDRWSLSIARLPRPLLQPLHAASTRLRSPPQPVPASPSQPQPVPAWAPSAYMVCPPAPSPPLPRQAALVHGRAATQVPDPTPPVQPCRTSAGRLAALLPLRRLLSRTATQRNPCEALRPPLPPLHHPHSAQGLPPPNHHPHHPQHPHPRPAQVQQHHHQPHPSSPHQPQPNQSPAQGHYPSPHPSHAQGPPPHQSPYVQQLQGAPPPQQQQQQQQQQQQPQPQQQEVPYYQAHPSPYSTNSAPSNYSSSETPELMAAATMNRTGFPPISYHTPQSNSPASVQSPQHDQHGRPIYGQPPSQMPQSMYYTPYGSAPVPQQSPYNQHPSSTPQQPMASNPLLMSHQQGQHMQHPHQPHPRTPGMAGSPKPQMSQAPLQRPPSGLGPPQQQPQAPPVGTPNMHQGPPGAPGVNPNAAPGPIPATTPLVVRQDQNGVQWIAFEYSRDRVKMEYTIRCDVESINVDELPPDFKTENCVYPRACCAKDSYKGNRLHYETECNTVGWALAQLNPCLRGKRGLIQRAVDSWRNSNQDPRLRSRRVRRMAKMTTRKAQANTHGAHMAGPGGPGAPGVPNSAPLAAPPRQSNMGMGGPQMHHHHDHPGGPQGGSDDVSEDDDGFLNVQANFSSFTGNDYAEAHTHHHQAPSGTQSPSDVRQTQNFYPTFPSGESVAGSSGLPPTHEDMKYPPPPHAAGLPVSKQQEQDEEERKLAMFGDLPESKRRKFILVDDAQRGTRVRVRVTLDTVKMEEMPDSYRKSNSVFPRSYFAMQMTSPPASPRGSKVFADEPDVESDPSFPLSGSTTVLVPTLDGEARVPKPRLTRTKRSKEITLNDLGYRMSWSQSRVFAGRTLFLQKSLDAYRNKMRSSMMGQGQDVTQVAPHFETRVGKRRWNDRIERNKKSRRDGSP
>Arab_Me14_ctg01_-_Arab_Me14_ctg01g330t1
MASAPALALALAMLRGHVAETQAPSQAPSQAPSQAPSQAPSQAPSQACINAMGPSLRSLPPPFIPLRLPLHAGTPAQHPAHQPRPKDCLSARDAISLLRQRRKLDQNLPSPCDCLASCGFSCNWPGWPRLVHVANLSACRIA
>Arab_Me14_ctg01_-_Arab_Me14_ctg01g331t1
MSRRTTCSVPTFPSSPRQQTLLPARFATTEPEARLHTTPPNSSEELAHTWPIQDVRMSGCQDRRMSGCQDRKTAAFQRSAPKPSPAQPSPVQSSPGLLFSQPHVSLATLPSIDTATRCDARGLPAAAVYALDDYSRRAA
>Arab_Me14_ctg01_-_Arab_Me14_ctg01g332t1
MSTSSFPPPELREILKEVATLLKDRKETVSVAETAAGGLISASLLSFPGASGFYKGGLTLYTLEARKAFVGWTDADTQNYKGPTPDIVTKLADNTRKVLGSTYTVSESGTAGPTGGNTRNRTPGYVALAVSKETGTVTREVETGSQDREANMVRFAVEGLKLVRDVIRRSVGASAGEGTKDERANTGADVQEEENVKLVPGDQGESGEVAVGALAS
>Arab_Me14_ctg01_-_Arab_Me14_ctg01g333t1
MTRPDTSLNRHGSIESSWSSRSGDTVRPYGRQGSLRGTPVTVKTTKDPNAPVEKEPDISPTTIPPAPPPKDPQHQPRKPPVWEGPISHDFRDYRKDLAVLQTSGGRVPSISRNPPTASSANSNPPWASSAPNGGTNMANNVWSSFFNDSDNDDVAQLSPGFAPSGGNAREDAMGFPRDDRRPSVASAMTVSSTGSKSSFSRGFHKKLQNVFGEDFPGEGRQNSDTSLNNARSNITETQSLHAPRNRGNSLNNTFGSGAYSSRPTSPTSSRPRTPQPSSEVTPWEFQDSQDAASSTENGRRRSSEQTLTKPGHRAHKITSRLPGHRHHRSKEENKTAPDSRGDISATYPLRPATSREDSTYSVRRVQQQQPSALSSAFASKTSLAPRPPSPTPSTYSEMTQHSVAQQSQSPSTSKGPGRFFARLRGKEKTENHPAVDHLKNMPAASSQISLAPSMNGPPSTRVDPNQPSFISRKKSTFDQLKGPSHTVKDGKKEHRRLPFKSSDKRAMSHAEPKGKDPNDAKADAVGNEAMWFLDTKLDDMSGIVNPQQPPMTPPTGDVQHVALAGDDEPGPKDDTWDAPDSWAVKRLDELREQSLDEPEVAAREQNDTKTYCLRIFRADSTFATLSATLNTTVAEIIQILGKKTVLQDELDNYHIVMRKHDTSRQLESNERPLLIQKRLLEQAGYSDADRLEDVGREDNSYLCRFTFLPAKMSGFSSLEKDPGFKQMQKFSHIDLQGKNLITIPITLYQKATEIISLNLSRNLSLDVPKDFIQACTNLREIKYTSNDARRLPPSLSMASRLTMLDISNNCLQTLDRAELHKLQSLQGLRLSNNGLTSLPSYFGQYRALRSLNLSSNSLTEFPDFLCEVRTLVDLDISFNSISSLPKIGQLTCLERLWATNNKLSGSFPPTLSNLVNLREVDVRFNALDSMDVMSQLPRLEFLMIGHNSISAFEGCFPKIRVLHMNHNPVTRFGLSGPVPSLTVLNLASAKLAQLPEDLFQKLTGLTKLILDKNHFTSLSNNIGRLYRLEHLSVARNSLDELPAEIGRLVELRYLDVRENNLGRLPPELWYARRLETLNVSSNVLYAFPKPSAAPPQEANSGIQLDGSHSLSTPGPAASPSYEELGKLEDFQHRRPSQASGGYLSSGTSPASSTRKGSMASFNTASTARKPSAVTRVPTEGTVTSTMTRKDSSLSSRLVTTFAGSLRHLFLADNRLEDNVFDELCLLPELRIVNLAYNLIYDIPPRTIRRWQHLAELYLSGNDLTSLPSEDLEEVGSLKVLHINNNKFQVLPAELGKVAQLAVLDVASNSLKYNVSNWPYDWNWNWNHKLRYLNLSGNKRLEIKPSGSYSGSGAAMREGRDLTDFTALVSLRVLGLMDVTMMIPSVPEQTEDRRVRTAGSAVGTMAYGMADSLGRTEHISTMDMVVPRFRSHDDEQVLGLFDAQPLAGGGSKIAKFLYDNFKNRFADELDRLRPNENPVDALRRTYLGLNKELATSASQSLDKNAYTPPTQPRGAVPELGDDDLTSGCVATVMYLKEMELYISNVGDAQALLIRSEGGHKILTRKHDPAEPSERARIREAGGFVSRQGKLNDVLEVSRAFGYVQMSPSVIASPHILNLTLGDTDEMILVASRELWEYLTPDFAVDVARSERNDLMRAAQKLRDLAIAFGATNKIHVMLLGVSDLKSKQRARFRTHSMSMGPSGSPDDFLVGRRPGKRARNMVGDSKLARLDQEVDAPTGEVSLVFTDIKSSTLLWETYPIAMRSAIKMHNELMRRQLRIIGGYEVKTEGDAFMVAFRTVTSALLWCFTIQSQLLEVQWPQEILNSVNGQEVVDPDGNVIFRGLSVRMGIHWGRPVCEVDPVTKRMDYFGPMVNRASRISSVADGGQITVSSDFIAEIQRLLETHIEGDRSNSTGSEEAFGDDVHSQLIRQELRSLSSQGFEVKDLGERRLKGLENPEYIYLMYPHSLASRLVVQRQLEQQAASSTQESSMGQKMPGSQLTIDTEDVWDLWNISLRLEMLCSALENPGSSELKAPETALLERMKNRGGEITDRFLINFVEHQISRIESCATTLALRHMMRPMGSAPLLQQACHMGDIFSELEAKLKRLEQFEQEAMADMAPS
>Arab_Me14_ctg01_-_Arab_Me14_ctg01g334t1
MCTWGGAGQGQDQAGGRAGGGSGAEEAPGSAGGAGGAGGAGGAGGAGGAGSAGGAWRQRSQTAAGSCRRGRAAHSASSSTAAGLRMPTHLPVSSPNAPLAPGDLSSTHRHPRSSPACNTARKCASTVSGAPSWPHTRARHVAGSDSPEAAEQQLSAV
>Arab_Me14_ctg01_-_Arab_Me14_ctg01g335t1
MSDSQEPPAKRARLEADAPFTGVSSLDAPGSPVDDLDDDFYDTTPVKPAALSSAPHDGPSASLTATAPAPSSFSLPGLGSLGDTAVTQPAAEIDADVVMGTAAHDEGELKAEEAFYHDASAVEPPVANQLQALDEAPQHGKPLRPELHAASLTPAQDAAETTSTTAPVLDDGKIPKESAPAVNAPVEQEPSVVAAPATEASEPTADESKAEFLRIGEQNKDNKEAEWQLDSDASDSSSDSSSSDDSSDNDADDGELMDPEEMVRLLMAESADDAGATGKAKVKTLNELDEQYEKPDITVTNETQITELGKVEAVVDNLVLVRAKISGDYQVLESGSALCLQNFTIIGKISEQIGRVEEPRYSIGFNDPAEITALGIAKDTPIYYVDAHSTFVFTEPLRKQKHTDASNLHDEETNEVEFSDDEAEAEFKRQQKQAKKARQEAKNEPEPEQKPIPTGPRGHVDKPVSYFPAANEYQGGGLKYSDDEDEDLGMYKPLARPSHFEEIVGQGAPLEDRSHVRRGMMRGRGGWGDRGRGFRGRGNFGGRGDFAGGRGDFGGGRGGRGDARGGRGDRGGGDRGGRGNKQADRGRPQNQHQDNRQMSVPRPDNGSATSASPARQQEHQQSSQPQHSPPAKSKNKNRKQRQREKREREAQEKQQHQQQQNQQQQNQQQQNQQQQNQHQHNQHQTNQYQHNQQQHNQQQHNQQQKPQQQAQKPRQQHASPVPSGASHASSYANNSSTGWPTQYPQPAVPAASYSPAPPPATAASYANPAPYAQQAAAQAQPSQQANWAAWAQWFQVVGAMSQQGGQAQQPAAPAQAQPYAHPQAPTPAPLPPPPPQPQAQYGYPQAWQYPQNAAPAANTNSQQANAQAGAQSLQDILRALGGGGGGGGGGSGGGGQR
>Arab_Me14_ctg01_-_Arab_Me14_ctg01g336t1
MPPPPPPPPPRQGVPIAPRPPVQAQKPPHELEPIIAFYIFAAANVVAAFFAPIQDCDEVFNYWEPTHYLNHGYGLQTWEYSPEYAIRSWTYTGIHSLVIKLGMMPLRFLGFARSKTAEFYFLRTFLAVVCALCQTRLYSVVAKTFNPRVALFFIFVMVFSPGMYHAAPAYLPSSFAMYMTMLGFSAFMDWTGGIRTAQGIMWFGIGAILGWPFAGALVLPFVAEEVFLVSLTGEVVECITRLADGFVRSLLVLALQMALETFFYKAITCVPWNIVMYNVFSSGSRGPDIYGVEPWHFYIRNLALNFNIWFFLALGALPLVLIQHLLLQNSVSKQTLLRSIVFVSPFYLWLSIFTFQPHKEERFMYPAYPALALNAAIALHILLANLGSTDPSRWVSKVPPQVKLAIVSIPLLLAFDVGVLRTIGTLTAYPAPLKVYKPLHQAGVSKPGDNVCLGKEWYRFPSSYLLPDRVRPKFIKSEFSGLLPGEFSEANAGGFGLFPGTWLIPSGMNDENLEDPGKYTSIEHCEFLVDSSLPGVASTALEPDYIADTERWEKLKCEPFLDVTQTHFLGRLLWIPDLPFVPQQLRRKWGQYCLLQRKSPGEKAQDA
>Arab_Me14_ctg01_-_Arab_Me14_ctg01g337t1
MSISSVQRRRHIDELVDEVKRIGQATLDAAWRDFKIRPKLILYVGIATMIVLWLAATSLNRLRFRKRLSTTTPSTPRLEKRLPLRAVDRAPGVWTPSLFRRPTAKPYPSWSVHTTKPLPYRPFRYGPRYNITMGLRTMEWDEWIELDNGYLKYHSTKASRIAARGEKCCKTAPEAWDAAVELLEELCGYLPERYPTLFEPLQGGGKGVKNAETGEVFDIASCLADEDPMQTCARLVQDDLAIMIERPDGQYYLLAGAILLAGFWRLQDKFGMPLSEIHTSGDVPQYKEKLEKGMLNMFKRLQPEKPVLRNNYFIQVDDNLAWSESLGSEDEEGINWASADTTEGVGNIYFRSERQSLRRLPKSGGIVFTIRTYFHPVTEICKEPYVPGRLASAIRSWGDDVSKYKGKAQYADVLLNYLDAMHEKQVEEGLDLGREDEVRAYPY
>Arab_Me14_ctg01_-_Arab_Me14_ctg01g338t1
MRLPQRFKRVPNQEPGEEQDIILPAYPSQTKMDVNNNVETYHSSSWEPMRTDTEYTAGAYTTVGLPITHHKTWVEHLEEYEHRRFGTGILSFLYNNFVAGWRAGLLRAFLFSLAALALNISIFLWLFLEYGPVRGNGTINTSNCDEVGNLETGIKVGLNVVSTLILGASTYAMQGTTAPTREEVDSAHSKGKWLEIGTQSWRNLIYVSKRHASIWSILAITSLPLHLVFNAVFFTTTETYQYAVAVVDQGFLQNAEFQATSENSSPTLPQFERFVWNGNCDGNDCSWDINNDGLVRQLLDDVRDSSRAQAYKRLERPECIESYTEGFMQKYSDVVVVSNITQVDTPVLWTRYSQRNLSKDKKDTNQDPFHWVCHDMLKNSVEGPDRCSRGFAKKHIKPEQWTVYGHPVDYCFARVEPELCHLQYNAYIMLAVVVFSVIKVLAIAFLVVTHPKGDFLRTMGDAITSFLKKQDETTKDMCLVSSAQIRKQGFQSPYSPQTFTNARPRWWTGANTTEFFSTIGISAGYVVILSSTLYWAISETDGTAFDSGLGRPNIQSLANLRPDNTKSSTIVPTILTANIPQVGFSLLYVFYTNIWSKLLIAYEFDRLTRVQKGLRVSERSKGQQRASHFFTLPTRYALPLMAVSAALHYLCSQSLFMARFDGMRDGNIDPQDQMVRLGYSATGMIALISVNFAMMVVTICVAGFRRLSTGLGEMSMSVVISAACHIKRPEYEPWLQAVQWGDVSGGIGEMEGGQDIRHCAFTSLSAERPIEGHIYR
>Arab_Me14_ctg01_-_Arab_Me14_ctg01g339t1
MDTDCTIPAPLPVEANKLSGALPKAPFAKVEHSSSPPPLIEDTSDILEDGEIHEQQETVSSLRSELQLSTLEYSALNDRFKRLERQHSDMQDLASAYSEVIRGFSPTEIQNVSIDQLQAEAGHDGLRAKALEADVLRPLIREAGGLQALISQMHATKTLIDKAGGLRELEKFVSDLRTIRDTLDELKGSQGLGGLVSEVRALLAHKQQHVELKSRVDGPNGLRTKAARYEKLIQAVTDVQNDTQPWKQNPTASTVSSVRASSSSTQPARSQQSPAGPAAMNPARARLISATPLEADPDRDLYEPVPPVAEPLNKTGSNNTPLGVSQVQPVASSSTLKRKGVENTAPSVWKRARVDLDRASALVQASLSPSTDKQLGRGSAQSNTAAGTAGPKTRAQPSRSEYKETWTEQVWGSQPRARKAVATPRMPDWMRADIQFGKVGFGSVPSTGRPAYPSTAPSLDVESHADTRWRLVRLGKISGGVPPSLSARPETCHEGRTASSVLQNRDLKALKAFFKHPVALWVGSKDGYGTSSWDDYQSYDLKRDAQIPDELLVSLLNELVKYVDMGNISRYEQMAPSCETCILSYLLDEHKLSGVSQERRGCRTCTSTWARHSRPCALLQDVSGVRTIIFLPLGEGLRSDKRWSDMGYWVRVAQ
>Arab_Me14_ctg01_-_Arab_Me14_ctg01g340t1
MTRHKHRRATAPEHLGSAPPSAVRRPPPAARRRPLDSDSEPSGVAAPSLSSRAMAEPSSAGPASSASTELQYAQYDGAKEEHGGICVSWCVYLYLCVYLYLCVYLYLCVYLYLYLYLYLYLYLYLYLYLYLYLYLYLYLYLYLYLYLYLYLYLYLYLYLYLYLYLYLYLYLYLYLYLPPRPCTSSYPPRHTDSLVAHYHKLTSQALDKDQHLIGVIISKLEPHRSGTYRGYIAMLAVQESHRGRGIASQLVTNAMDAMAARDADEIVLETEITNTASLKLYERLGFLRSKKLHRYYLNGNAAYRLILYLKEGTALKRPEAAHGHDMPLGMPIDDAAIS
>Arab_Me14_ctg01_-_Arab_Me14_ctg01g341t1
MRAGGLGGFSRTSASPSPSTTISCAPRRTGELAVMSFFRRRFGGGDTKAPTPTPPPERSSPSTPERPSNLRVITAEQLHTLQQAGKGKGKHGKRKNAWVFGLGGLFGLVIAAFFAGSNDLIDLKSIEGMNLESLMEALPANFVRSAQQLQKQERDAVNYDSFAIGMHAREQGIRAAHPVIMIPGVISTGLESWSTEEGARQYFRKRLWGSWTMMRALVLDKAGWKKHIMLDKDTGLDPPGVKLRAAQGFDAADFFITGYWIWNKILENLATIGYDPSNAFTAAFDWRMTYMNYEVRDQYFTRLKSHIEVANHVSNKKAVLLSHSMGSQVLYYFLHWVEAEGYGNGGSDWVDKHIDSWINISGCMLGALKDLPAVLSGEMKDTAQLNAFAVYGLERFLSRYERAEIFRAMPGLSSMLPIGGNAVWGDHTGAPDDAPGQNVSYGNFLRFRDTNSSNTLTSQNLTVEESLPFLFKNSEPWFQKMIQTSYSHGVAHTAKVVEDNQRIPAKWINPLETRLPLAPNLKIYCFYGIGKETERAYYYRADDDPLSGLNVTLDTAYTAASAGEPTGGGGNGGVDHGVVMGEGDGTVNLLSSGYMCAKGWRMKRYNPAGVQIKTYEMKHEPDRFSPRGGPNTADHVDILGRSSLNDLILQVAGGRGELINETIHSNILAYAEKVKIYEEEEHGWFDL
>Arab_Me14_ctg01_-_Arab_Me14_ctg01g342t1
MASYTTTRTSSSSSNSSSSTFSSPTLSPTPTYSSPTPHDPTARRLSLTIQNQHIPCTEREAQLLSLLGFAPSDPKTGLRARCMAGLG
>Arab_Me14_ctg01_-_Arab_Me14_ctg01g343t1
MASNTTHTVTTVALDRNRTQPATSPPKRRRTSWRTQHPDPPALATCIDPHSALMQGHDHEHASERSRHLLGDKAEETEHAQASKSRKIEKMITPYLAHHIPHQYNPLGSADAPAGHANTKYCYRHRPDLLCRRQADEPSMEQLQQDIGRESQADQQSIANVWSLFSAAPSRHRNLMLQGILAQCCFPQLSFVSSAVRNLIKIDFIGALPHELGFKILSYLDTTSLCKAAQVSRKWRQLADDDVVWHKMCEQHIDRKCTKCGWGLPLLDRARLRHEKRRIQLRASGRGINEWSPNITPTPDTSAPPTTLVHRPSDASDSATGSKRSAPEDPSSPESSSKRSCTGVAIKGEARDQLASYFDQPKKRPWKDVYKDRFKVGTNWKYGRCSVNILKGHTNGIMSLQFDDRILMTGSYDATIKVWDIKTGKEIRTLTGHSAGIRCLQFDDSKLITGSLDRTIKVWNWRTGELIRTLGGHTDGVIGLHMADKLLASGSSDHTIMVHDFNNYQRVTLRGHTDWVNSVKIDLASRTLFSASDDMTVKLWDLDTHQCIKTYEGHVGQVQQVLPLPHDFEIDEDDFNATADADASDTASQPPSDNETAPPSFSAIQEEAIFPNDPSRPSPPSYMLTGSLDGTIRLWHVPSGRCVHRFFGHVEGIWSLAADSLRVVSGAEDKTIKIWDPRTGKHERTLTGHTGPVTCVGLSDERVVSGGEDGTVRIHCFTSV
>Arab_Me14_ctg01_-_Arab_Me14_ctg01g344t1
MASPRSPASSASSAGSRQSLDPGRHRPQTLEDLVNHFVAAKRALNSQTVLWRANDIVTTARELLEENAILAAKNASIRSLVEQQVDTLEAVRRGVDVVEAEVQVEFKQLLHHVDTSFSGLNSTLAVLRETPIEAALQPPATPQKHLYDFIDSATVSNLEATLRACIDRYNDALATLGDTNDAFDTSLDNLHSSIENVPMTPATTSNPSPIPTLYHALEGHAKEAARAFQGLVQHYDLCVTALQHTEGGSAAATQATGDAPSQSADDFAAPPEPMGEEERQEMLAVLQNDAQEVDEVVSEIRERGAEMTFLLNQIENHINHLRSEASALSSILQMIAHVTADVRSHLLTSRSFHASWLHDTRPTLLNGIEEWENQREFYERFDLAYAELLVEVSSRRRRHEKAKRKAEEAQKELDRLFAEDERAREQFALAQGDFLPLDIWPGLRDAPRQYEVRAVASDMHDDEDTEAQEETRGQIVKSIPQLGRNVVERALTRVKRRM
>Arab_Me14_ctg01_-_Arab_Me14_ctg01g345t1
MFCFRRFVPIWTVVVVVTFLFFVTHMRPGHQHMDQEEAIYYRSIDTLFRSEKDALLQWTRSTKQPLKVETDHWLDWKPTSK
>Arab_Me14_ctg01_-_Arab_Me14_ctg01g346t1
MPASKHPVKINVDLGEGYGNFKCGPDELLLPLIDHANVACGFHAGDPLIMQQTVRECKKHNIAVGAHPGLPDVQGFGRREIKMSPEELTAMTRYQVGALKAFLDAEGMPLHHVKPHGALYGMMCRDKDVCRAVYEGVPKGTVVFGLAGTLQEEVAKELGLPFVAELYGDVKYSKDGTLVIDRKKKSWEREEAQSHIRSQVENGTVTAVTGEEVQLPLGDHPVSLCCHSDSPGAVEIVTAARQIIDDFNKKNFPQS
>Arab_Me14_ctg01_-_Arab_Me14_ctg01g347t1
MDKLQTVLIANRGEIAVRICRTAKKLGVKTIAIYSEADAASQHVRDADEAVLLPGSNATAYTDEDAILKIAKEKSADAVIPGYGFLSENAPFARRVSDAGLVWVGPSPEAIESFGVKHTARDLAAKADVPIVPGTKGLVEDEEEAAKEAERISFPVMLKATGGGGGMGLITCDNVKEMREGFKMVQSRGQTLFKNPGVFIEKYFPASHHIEVQVFGNGLGQAIHFGERECSIQRRHQKVIEECPSPFVERHPELRQKLGAAAVRLSESIKYGSAGTVEYLMDDQTGDFFFLEMNTRLQVEHGITELCYNVDLVELMLRQADAQLTGKGGLDGSELKQMQPSKPSGAAIEARVYAENPLRDYAPSPGLLQKVEWKDVPGSRVDTWVFTGSRITPNYDPLIAKAMAHSRSRDETISRMKELLTNSVISGPPTNLEFLVQILDDSRFASGETMTTFLKDFEFAPHAIDVISAGAYTLIQDLPGRPTVGKGIPHSGPMDPMAFQIANMLVGNPRGTEGLEITLSGPDLRFVGPAIVALCGAPMEATLDGDDFPMWTSVKIGAGQRLKIGKTIAGGCRSYLAIYGGLPAVAEYFGSKSTSPLVAIGGYQGRQLAPGDLLQIKADLPSKIEIVALPERLRLSYKTDWEISAMVGPHDEGYFAPEDIKMIYDTKWKVSHNASRSGIRLVGPVPKWARKDGGEGGAHPSNLVEYGYPLGTLNWTGDDPCIFPVDCPNFGGFTSSTTVIRADWWKLGQLKAGNTLKYVRVGLEDALKKRKRNDKFLDSIEQAVQTQSGFQQISNLQAGHVDFHECNIGKAIIWERAATADTPQVRYRQGGDDHLLVEYGNEEFDLNHRCRVTALEKALNSLDTPGEVKDNLYNTVGCCTTLLIYYNGAKLPRTELVSHLQKLEQSFGDLRSTKVPTRIFMLPISFESKLQDDATQRYMTNQRPHAPYLPDNLSFVAKNNAFTPQQLKDIYLTGQFMAVVVGFFCGNTVSLPVDPRQRMNAPKMNPSRVFTPEGTVGWAGSCMSIYPVDSPGGYQMTGRTIPCFDYYAQKPGFEKPWIFRDFDILTFYQVSEQELDDLLGKFRAGKFTFEYEDVEFDMADHNKMLQDSAEEVKKIRADQAKAQEEMTRAENESFERWQREKAENQVDESTIEKLLDDPSIISVEAPVDANVWKVEVKEGETVGEGSVIVILEAMKLEIAVKTPDAATAENAKLRVERLLVKPGDTVTAGGHLALLKKE
>Arab_Me14_ctg01_-_Arab_Me14_ctg01g348t1
MSSRQKRQSKPKAPATPTTPTTPKETGERSQYLPASTVLKNVARAVALLFVAGVASPVSQLNLTPVFGSIPASLHHQQAMTFSALAGLGVRRLLKGYVSVDVSAWVTVLAYWTPLIQCFLFPRSTQLGIDYGPLIVESLTYFPLLFLSMYAVSDLLDTVDFSRWDLPSALGDAILPMTSYVGVSFVSRFFGALLPAFIGQHVYLTRIGFQMLLASAAAFVTPSKLLVLAFPAILHTLWMNPHHPSDQAFQKANATLVATQNYTILARQESLTGYVSVVENYADNAFRLMRCDHSLLGGEWLVTPDSYKKGQRQKESIFAVFVLLEAVRLIEDPELTPIKSVPRALDIKPVPESEKAALVIGLGIGTAPNALIAHGLNTTIVELDPVVHRYATEYFDLSPNHTAVISDAVRFVADTSVSAPKSYNYIIHDVFTGGAEPVYLFTTEFMQGLYNLLTDDGVVAINYAGDLTLGSTKLVLNTIHAVFPACRLFRDSPAPEGHKEGDSDFINMVIFCVKNDHGKGKKAVGFRKATSNDWLGSIARRNFLQPREELEVKFDYESGGQVMGSADVAELEMYHEEGAVSHWKIMRSVLPAGVWEMW
>Arab_Me14_ctg01_-_Arab_Me14_ctg01g349t1
MAPLALRPATAQDPADSKILPMDADDAAMNVDEIFSRDQRRHQQEEKRKKLNAKNRRKRYLEVHPEYFDDSSLELADPLLYDRLIRRFQTAREREAEGQRKGFSGQMSTDLWRAEAKKDALKHTDPNSLFTYSRGPQGQIVEEDKDEVPMTKEEGKAWWIDEMTQRFLNGADDDFEYKTVDENDTYDDEKERDIQDAYFDSMESDFDSDGEGKEKILTGETGIQDY
>Arab_Me14_ctg01_-_Arab_Me14_ctg01g350t1
MSEKPPQERNSREPDDSPARKELASHSTSSRGGKSRAEEIARINKLATAPGVTAESFAHLDEKKILRKMDLHLIPMLALLYLLSFLDRANIGNAKIEGLVDTLGMSGMQYNLCLTVFFFTYAAFEIPSNLLLKRLRPSIWLPTIMVAWGIVMTLMGIVQNYHSLLIARIFLGATEAGLFPGVAYYITMWYCHHEAQFRQALFFSAASVAGAFSGLLAFGIAHMDGVGNLEGWRWIFILEGILTVIVAILAYFTLYDFPETASFLTEEERTFVVYRLKYQGASNETVNGVRVAEDDSFQWKFVKSAFLDWQIWTSVCIYWGTSTIDIIILELTKLGISCPLYGISLFLPSIIRGLGYTSSTAQLLTVPIYIAASVLAIAVAWCSDRVGKRYPFILVCLCIMAAGFIMCIASTNPGVIYAGVFVVACALYPAFPGNVTWLSNNLAGSTKRATGQAIQIGVGGLAGAMASNFYRTEDAPRYILGHALELAFIGLGIIALLVTVFNYKRINAKRERQLSEGAHNGYTPEELGELGDRSMTFKYFL
>Arab_Me14_ctg01_-_Arab_Me14_ctg01g351t1
MCSSNSKNYSASSPAVNYNQPADTWYCNECGELNMNWYDVCPVCDRGVRQNAAFQSYAASHTACGSAGSPAPGSWVCSNCGAANSANTPDFCPICGYR
>Arab_Me14_ctg01_-_Arab_Me14_ctg01g352t1
MVFGLGGSQEPTLDQVHDQQTRRPSAVEVVNEDVRRKSVDNRIVTGASQLTTRQSIVPVALVTLLFFLWGFAYGLLDVLNSRFQVALDISQGESSGLQAAYFGAYFIGPLTYSGWFLRKFGYRYTFMLGLGIYCVGALMFWPSAVKRSFGGFCGSMFIVGSGLSTLETSANPYIAVCGPPKWAEFRLELSQSFQAVGSVVAPVLASFVIFKNVGEDGRSLQSVQWVYLGIAVFVGILAGVFYFAPIPEITDSDMADQAEMMTSTTGYVDKPLRKQYTLFWGVAAQFCYVGAQVGIASFFINFFTQAHPNLNITDAHHQGANYYAIAQALFAVGRFSAAGFMYFGVKPRMVLLVYQTLIMVFLAAAIGVNTGSVTAPNWGGLALLMVVLFFESCIFPIIFALTLRGLGRHTKRGASFLVASVSGGAVVPVILGNVADRIGTQRAMVVPLAFFVIAWSYPIYLNLYKAKELDAYTDSKVGTSEEGTVDFDSIIANKDVEAARFEHKA
>Arab_Me14_ctg01_-_Arab_Me14_ctg01g353t1
MSYYQGNGQNYYNPSIPHSTQGSQQPYQGPYEQHNGEQENGGAGGYEYTIPVRRNSSANRNDELFIGTNAASPAMSQGPTSPTAGSYGSNYGYQSPQQQYNPQNYNAPAVALPNPQHYGGVNRAFAAPASSHQPYIPAAYADSGLNRNSSVSHPYGFSPTSPTATYPSPTAYQNSQFGRTASLQGRSAYSPPAPPPLPVPPGSAQSPTDDWGSYPARTTSSAHSQSYYQSSHAPLPSLPTHDTGYNAQDRVARYNSTSSLHSNPLPPTPEVPPHASPQRTNTVSSRPLPDPPTESDSDEYFSPHNGPSYNQDQLFDDVMNMTTGSSPRIQVQQPNGAEHYDEMGRRIPGRNGDRTNGDRLAPYPVRDVYTSDESDVEAAAGLAALRMAEEQEQADEARRRSGGAGLFSSYATMPSPPLPNEPSRPAEQSASDSDYAPIDLGLYGGNFAPSFAYGGEPSQLVAGSSQGVSSSGSQRRSEPASDDYDPIHPFPSFSTNARVDTFGTGGLEEPSARRRSYDEGDEVTLMDSASGMSGMSGATLLPSSAMPGEPPDMFYHPGMTNRPLPPPPTTSNSSRQRMNHASTSSQGSGSYEYWRNAPSSRGSYPVDPTSMQMVSLTGAHVPRSTSLLQHSNPPREVPLPRSKTDAEQGHRLRQPNNRNTFYGGAADSDGNTMTPASTDAVAIDLPTLPTGRRFNPAKLSTNDFKKCTEPWALSAVISWLKFMTEGENDLKEGPIQEGLIALFTHKVPTMNIADAETLSSRVVQDMYKAGTLVHDEEWLKFSSSSMTGVIFQLTGAGCYAPMLHTYASPGRCYSHHCQRTLKKIDLHSPAAAARSEDWATFHKMKKEDVEKVNKKEIERQNILHEIVQGEDNYMERLDVLRRLYRDRLLSAQPPVIPPKKLTRFINDVFSKADAVKKANEDHLLPQIKYRQQEQGPWISGFSDIFREWIRKARQAYIEYAAAFPYANFLVRQEADRNMLFRAFLDEARSNRLSNKLSWDTFLKAPIDRLQRYGLLIDTVIKNSTVDNEEKRNLVIAKEEIKAVTLECDARVAEMGRKVSLTDLQSKLILRPGMQRVELNLDHLGRELIFRGDLQRMGGSRFNWLETHALLFDHYLVLAKTVAYREQDGVTKSEKYDVSRLPIPMDLLVLESEDDDPVVRSNLKGIAPVNLNGRLPVGAGRTTSSPSPGVLQHTTTSNSMGSTSTGTSGKTMVTSTNLENPKDEKILYPFKIKHLGKETYTLYASSAQNRAEWCDKLIIAKTRHAAALFAQNAEPFRLRVMADAAFAYDSVMPTQKGITIKGTPLDRSIEEVEKLFSNSGRPVPICRARVNCATAFNQPYGKHIVAVGTDIGVYVSDYDNPRGWSKAIQIPRVTQIAVLEQFSLMLLISDKSLIAYHLDAVCPVSGVPPSNDSTRRAPQKLSGARDIGFFATGTMKDRTLVFYKKREGLSSTFKVLEPVYQKSTEKKSRIWKTGRTEFFREYDEFYIPADCYTINLFHSSLAISTAKGFEVMTLDKKQPWSVPDLKQQHVATIASRLTNQDPLGMFRLSDQEFLLCYEECAVYINKNGDISRSVIMEFVGKAKSAAMYGPYVLLFDPDFVEIRNAQNGRLRQVIAGRDVKCLDDGLSGTSGHHRTIKMSLQHPQVERCQVVVELVLNEGQKE
>Arab_Me14_ctg01_-_Arab_Me14_ctg01g354t1
MAIFNRSSSSSDGASPHNSDPEKYGKSEYTTGTSSGPVLDSNGVAVHTDGNHLHRGLKSRHITMIAIGGAIGTGLIIGTGKALAQSGPGSILIAYTSVGFLVYIVMTALGEMAAWIPHSSGFAGYATRFCDPALGFALGWTYWCKYIITTPNQLTASALIIQEWVDPKRVNPGIFILIFLVLICAINYFGIKFFGELEFWLSSIKVLVIVGVILLSFILAVGGGPGPATGFKYYKNPGAFREYIGKGDAGRFYGFWSSLVNAVFAYLGTELIGVTVGEAQNPRKTIPRAIKLTFYRILFFYCLAVFFLGMLVPYNSKDLAFANSQKAKASASPFVVAIRIAGIKALPDILNACFLIFTFSASNSDLYIASRTIYGLAEEGHAPKIFKWTNKRGVPVPALAISALFCCTAFMNAADDSTVVFGYFVNLTTIFGLLSWISLLVSHIYFVRARRAQGITKDQMAYVAPLGLWGSYIALFFCILIALTKNFNVFTKGKAYGNFDYKNFVTGYLGIPIYLICIFGYKFFMKSKGVKPHEADFYTGKDEIDREEEAFVAHQAQKKLENAGKKDGSWFYKVFVSWLF
>Arab_Me14_ctg01_-_Arab_Me14_ctg01g355t1
MNKVSTVTTSFYNWKAYSLVGTIPVTAYSFPTITPTPSFTKGLGCASPTPTAFVISSKIHNYEWRMAYMNPGGMNFSPGSFGGCAAACALEDCVAFNSGDAQNFRTMNRVESVTGPFSLSLSARRQSLLVCPPKFPLHPAPPPPPPPPPPRRHPYQFIGTAPLLTTTSTPTPSLSPPITANPYGANACSNPTPTSFTVSNTLYHYNFCMAYMAPGSVNFNPGILQACAAACKGDCIAFNYGDPHNCRTINRVYAITAPFYGWSAYQLIGATPLPTAV
>Arab_Me14_ctg01_-_Arab_Me14_ctg01g356t1
MSKRNPDVEATEPDVSLSGNSSKLDINSAYHTGNATNQGHRGQGGRQASVAAKLRNPLAGLSAQQSSIKTPARPSIERLGSIAAVICTFMAVYSPGEGPVPFAYSAESFPLHLRDIGMSFATATCWGFNTILSLTWPALVKAFTPQGAFGWYTAWNFFGWIYCYFPSPRPRTSR
>Arab_Me14_ctg01_-_Arab_Me14_ctg01g357t1
MQRRRAQQPSGRRRRTCLRTAGEARRRGRELARRGRQRAWVGTAGVVRRAVVALLPGCPAALSLLLLPLLGLGLGDADGVGALPGVRPSFAAADVSDWVSPSPLPRVAGHVRLGFWRALCRSLTSLPHPPHAALLTVHPYALSLPSTTVAKSSLRKEPEVSRRPPRQPFLPLIHGSFNVTPEELFDLFGKFGPVRQIRQGIANNTKGTAFVVYEDVMDAKSACDKLNGFNFQNRYLVVLYHQPDKMIKAANDLAERQENLEKLKQQHGID
>Arab_Me14_ctg01_-_Arab_Me14_ctg01g358t1
MRRITSFKPQYRLPAARSATPPPPSYEPLSPTLPPAARRPADPAGPCRDDAPPHHPHGNGPPAPSAAAAEGSHALGHHGLPPATHAHPPPHDAALPRPQPPPSCSWPPGSPSDALAHAAVTTSQRASPQHVDHTRRASYASSPTALPRPLGERAPKHAYPRDPAYTHDERPPKRARSEFYSASSPTYVHQHSRPATSHNPGWSHNLEHMLDAGMRMYPHSGAAAPKQEHNPDKRLSDAQLLLDFFQVSAHTAQTPPSTAKRLSISQAAPPAYPAQYPPQHAPHHHHHHHPKHQQHSQHPQHQQHSQHPQHPPAPTSPHAVAPQPPFHHAQHPHPSSDIARVPEPPSLPTDATLPTPAVQAPSPPQDHSTAQPPPPMSNTASTEDTKPKKHQGWPKGKPRGPRNTPSTSKRKRATPKPRAAPPTSAKGTADQLQPLQSNGVPAAANASTPSSSTVTPPHDHPSGARRHSFSNSFLVLPTADLPSEAVRAQSVPLHVFLDSAPPAAEPCRRTKARQVNEPDLICASCKSSDSETKVGDGEQWIGCDGCKEWYHYACAGFSSEREVREVNKFYCEPCRPKFGQTTKVRKSIRAHTTVDYAGLNEGVLKTSDDNPEHHYIAAFKNGDIEFTPETFARMPPELVSADFLQKSNGFREPILIPGALNPRPWSSSPNTNTEPTAAVGPPPPTQDELDSPFEYETIADDGQDELGMVIPQGLTVRRVAELYGPNETVPVIDVKAQEGEGKKWSMSKWADYYEQQGEKPVRNVISLEVSRSRLGKLIRRPKVVRDMDLQDSVWREDDKFAPPPVQFYCLMSVADCFTDFHIDFGGSSVYYHIVKGRKVFFFIPPTKQNMKKYEDWCLSPNQGHEWLGKQVKECYRVDLYPGDTMLIPSGWIHAVWTPEDSLVIGGNFLTRIHYGMQLQVLEVEKNTKVAQMFRYPFFQKIMWLTVIKYLEEDPVPESVQELLQRGDQFKRDTPIYCEPDKFGHNSHLGPANYNRRYYPKHELEGLGEVLNYIHRTVMISLDKIEMPQKTRNAVMRSIPKGHGDPVVLERHFAMWVAWKRGNETIPAWAVSDVALPETVDAVEKRPSVSPVKRVEREPRPELPKVPVEALPDPIRTYDVSPPNGDAVPMVEPVTPSSTAPMTGFLRPSASNPHITTPKTSQLGPKRVACDACRKRRIRCKHKDELVDSSKPGMHTIDLSGSYGISVKRRLSDHSIVEGNAAVVAGPVNGGPIMADVNGDPYALKSGRVKACADCRKSKRRCIHDEYGNVDPIKANEVPVPRGSAAKRRRVSDEDAAGMSKRMKTESAMDDGGLMSGDVRHSRHSLPHQFSIGGSLLQDIAYSAQQALNHRPEEELMPIDPALQGYANSDYSSANMAPSYPPLGDEVMSSIEQQHGHPESMDEVEYAGNNGQQQGPSIEPLTPGLPSYHSHGHDEDGHRTQTNGYMSYPPTQHDAVRPVSSPVSPRHVRAMSPTSPTTHNHNMFTTNSDFPPPVTPITHHRAAPSSNHKSAQRHSRTPKSTPGGRRRDSKDGIKLEQGLTMAMTLGMGINLDFIDPNLDQASRDLIKQLQAEEHGLRRRSRGETSVASPSHAQAQPQVTPTRAQAGA
>Arab_Me14_ctg01_-_Arab_Me14_ctg01g359t1
MREGSRNDAAPDCLAVATSSPELQHRRDSDIDINLTPAFPATIDCTQHRLPTQHLIDPQNTAVAAMDSLVAQYSRPIDADECQTEEQQLELYSGAPELSLKFALPPVAQQQSWLRAMTDDYSNPNCPIKIAHGTTTLAFRFKGGIIVATDSRATAGNWIASQTVKKVIEINSCLLGTMAGGAADCQYWLAYLGMQCRLHELRHKRRISVAAASKILANLVYSYKGMGLSMGTMCAGVTPQEGPALYYIDSDGTRLSGNLFCVGSGQTFAYGVLDAEYKYDLEDNDALELGRRSILAATHRDAYSGGYINLYHVKEDGWVKHGFNDTNPIFWETKLNKGEFSNVTSELV
>Arab_Me14_ctg01_-_Arab_Me14_ctg01g360t1
MASPQESITTVNGRRCTRSRARTAATSAPISTPAAPPTAVAPTETTTSTVAEQKPQTKPTAASSPAPQVPPPPPPPPPPLAPPVSSSQAEQSAVVVPLPTSQAAVSSPLGTGKAVLISLATSSSPAVFEPSAPAPMVSTPSVSLQSDGPAIASSQVAAAPTPPPARILPTSSDNNETAVIEPLPSSSLTTSPVAQPIVTETAGVVVSTSVAAVPDVIQTDSSSQTPLPVTSIAELLPQTSSAAISNPTHGPVGVIAPEQGTHTGGDGHTGEDHSSYSDSNPNIGGIIGGVVGGFVALALLSALLFFCLRRRKSKEAGWNEKSEVLSGFLSKAKAVPAGFGVFFARFRNEKTGPLDNPYQRHQPRSSVGSVYSTTSNGRGRSISELQRQPASGGGFVRRMSSRKSERNVLRKKTSSVSSQSPFMDVSEELVRNNNVGSNPFADPGPDTPRNLRISNPDTLEEQTRGPSPPQPAVTPRAARDPFASLIDEIDGAPNWLRDSNMSASNHRRIQSSASALRAHPPSSVYSSDPFADLSSIPPMPTQQPQPPLSTYSAFPAVRDSNYTIFGEPGPSRPSTTMFTPGLPSNPSASRDTNIFNTPATTPGFPSSGPPTSTSRLDRQSDPFDLDRPEVLSFKGMMNQMRDSIARQTTIRSRRTSSVSNWFGRDASPSGALNGASVRR
>Arab_Me14_ctg01_-_Arab_Me14_ctg01g361t1
MFNFSGYPGHLLAGQHDTQKDRPPPSKPIPVTFPVLDPPEPSIGTPPASWSRANGTGITQHFLGLKKPSDVTKNTLAQLNVTFQSNRDFETLLSSLSNDALSHIPPASWLDAPDKQELPASEPTVTLLSNGRRVPDRKEFFVRARELFFKNEDAFSTLTRKSNGSQAPLRLAHFRKFWEGLDNMAYYWDNSIDDYRSPDPAAVDTIAETVSSPNSTAGAGEQETRAETKTDWVAKMQNSIGSPNGSEPRKKAKTEAVNDQTMAHSVHVNGFGGSLAAQTASMIPSRVLPARIAPSRFPSTINMEPREKPADTSNGSYRGYRIGNGSEMPDQYRIDCVRAFVEPIAWAFGVTLSQHRRPPVLLLEHVRFPVRMSSVAWRGPQDRMKARQGWMEGPVLGIQCRPDVNFEASGNIEAQSNLDAVRELGGLLLLAQERAREGKVEQLAGEGKWWTTKQRWGGGPEGEVGDAAAPGDTSSKTATATPQQTTVQRNLDGSRSRKRLTPAQVWKIVKPGNSLWDPKVVYEAIGKDEATEWDDVFLVSSLNHHISLLKLHVHPAYLEYITYGKYPDSQPSDPNWCSPKLQRTRWFDLFSVEDRTEAMRGLWGIMSYLLRAKGGGQEDTVMRDSQ
>Arab_Me14_ctg01_-_Arab_Me14_ctg01g362t1
MYTSIFLASLVSLISLISSVSAAKALNPNLNAMLKMAATNYDRHALLAKDSDWYYDYFNHTDYDNPTGSVITADAATFPALTGFGISFALLKLGPCSMLPPHFHQRAHNLVMGITGNTTSWMINENGVRTVRIDIVPFRVTIFPQGSLHVMQNNGCEPALLISALNSDDSGTLNALNGLMTVPSDMVQASFGDENLDTAQLGKGIPGVGTGAVRGSPECLKRCGIEHGKI
>Arab_Me14_ctg01_-_Arab_Me14_ctg01g363t1
MLRKPTLFDLNLRLPKKKNQVRYVPQQTYVEVSPNSNVSQDETWPTCLNCQKNNKSCPGPPARHTFKDLGPSLVTNTKPVKATKSILSIPDPNQRYLTQVHENFTSNKSVYHKFKISPKGTSNQKGPTLQSASTSTASSNPFRVPFLRQPSPSQHHELSRAFVATINAGSIGLRMSIFGPFIQDVPARLGHNAALDAAVAVLINAHTSLMYKKTSNDVVSINLYLRAIKTLQGCLEDPREGMSTNTLCASVLLGLVEALAGPRKGNRYLAHVGGAGRLMELQGARRFLDPFAKDILRFNRGGIIVAACYERKPCFLAAPEWRDVAFDDSGLGFDEQLHTDLLRAFAQLPDILKDLKDLYQLRTPFSDTVRGTRNDSCIDPSLALNPDFDHSPPETCPSLDFSVDSFDNAEFTPEVHWEGTPDCGASLAYISAREDVLCKIQNLRASFCALGVHMVAKFNDGTTAVELPSVEEGSPIATAYHFSSWRDNVGYNSFWALCIMLNEYLTKLLPPSDPIIGSLESESQFLALEICKTWEEAWSTKPIGALHTAFSFVMAYEYVAPNIQEWILRGLNSLLDYQHIDTFRWTDDVIRMMSGRLTGDDPETIFSNVSS
>Arab_Me14_ctg01_-_Arab_Me14_ctg01g364t1
MARKAAEASDSSLSPAPEDISAQLETKATVKAATNGKKRKAETTVKTTNNTKRSKRAPADEIKEEAVETPAKKKVTRAKKSKEPVLPLEERTMDSKLRIGAHVSVAGASMILRPSKTFSSSNLSSTANIPSANAFAMFMKNQRKWDNPDMDPEHAALFINGCQDHNIEVGDCCLPHGSYLVNLAHPDPERKKQAYDCFQNDLVRCEKLGIKLYNFHPGNANATTREEGIKLIAENLNRAHTDPATGSVITVLETMASLGNTIGGTFEDIAAIISHVEKKDRVGVCLDTCHVFAAGYDLRTPNTYAEVMKKFDEVIGLKYLMALHVNDSKAPLASYRDLHARIGTGYLGLRAFHNLVNDTRLHGLPMVLETPVDSVDGNGKKFEDKSIWAREIKMLEKLVGMDVETDEFKDLEKSLHEQGNGERERIGDQVEKKKVKDAKPKAVRKKKAEGDEEVEDAEDVKPKKSAPKKAAPKKAAPKRKAAAAKKVESEEDNDDDE
>Arab_Me14_ctg01_-_Arab_Me14_ctg01g365t1
MPKDKRKRASGAGDSTPYSKPSAKQAAAHSIFKMDKDLGQHILKNPGVASAIVQKAHLKQSDHVLEVGPGTGNLTVLILKAAKAVTAVEMDPRMAAELTKRVQGTAEGKRLKVMLGDVIKTELPRFDVCISNTPYQISSPLVFKLLSLPHPPRSCILMFQREFAMRLFAKPGEKLYSRLSVNVQMWSKVSHIMKVGRNNFNPPPLVESNVVRIEPKNPRPQIAYDEWDGLLRIAFVRKNRTLRAAFLGTTAVLELLTQNYRLFCAQNDIPLDDTPLAADEELSTTEPAETMDVDTNDDFKGFSDPDDPDDELPDFFKQLAAESRAQHEKGMHRKKKGRVSELVREKVRKVLEEETQLADKRPRLCEEGDFLRLLYAFNQEGIHFS
>Arab_Me14_ctg01_-_Arab_Me14_ctg01g366t1
MPTVHLLDYVAGNVRSLVNAIEKVGYTVEWVKSPADVPAAHKLIIPGVGHFGHCLSQLEQAGYVEPIRTHIRSGKPFMGICVGLQALFEGSEEDPNVQGLGVIPSKLRKFNDADKSVPHIGWNSANTSRSGEATDESLFGLRPTSKYYYVHSYAAPYEEGKLEKDGWQVATARYGDEEFIGAVAKDNIMATQFHPEKSGAAGLRVLKAFLEGKRSQKLPETPSAAETKEGLTRRVIACLDVRTNDQGDLVVTKGDQYDVREKDGNAGVRNLGKPVDMAKKYYEQGADEVTFLNITSFRNCPVADTPMLEILRRTSETVFVPLTIGGGIRDTVDTDGSKISALDIATMYFKSGADKVSIGSDAVTAAEEYYARGKKLAGNTAIESISSAYGNQAVVISVDPKRVYVSSPDATQHHTVKTATPGPNGEAYCWYQCTIKGGREGRDVDVRQLVQAVEAMGAGEILLNCIDKDGSNSGFDLELINDVKNAIKIPVIASSGAGNPGHFDDVFAKTKTDAALGAGMFHRGEYTVKDVKDHLREKGQVVRPFEAEI
>Arab_Me14_ctg01_-_Arab_Me14_ctg01g367t1
MTRKLKHHEQKLLRKVDFNTYKSDNDHRETLVMRRYAIQGRDDYRKYNQLCGSLRQLAHRIANLDPADPFRRKQENLLLEKLFDMGILGTGGGGRGKLSDIEHKVTVSAFARRRLPVVMARLRMSEHLTSAIKMIEQGHVRVGTTVITDPAYLVTRNMEDFVTWVDSSKIKRNIMKYRDKLDDFELEAL
>Arab_Me14_ctg01_-_Arab_Me14_ctg01g368t1
MPPKAKKGQDKGKAGEEEREDPLQAVILADPFETRFSPFTLERPRCLLPLANTPLIEYTFEFLANAGVEEIFVYCGAHRRQVEEYINRSKWSAPSSPFSRLELIQSTSHSIGDAMRDLDSRNLLVGDFLLVYGDVVSNLPLEGALAAHRARRVKDKNAIMTMVLREAGTTHRTKARGTSPVFVIDPEKDRCLHFEQMPNRDQSHFLSIDPELLSDHQEIEIRQDLIDCGIDICTPDVLALWSDNFDFQAPRKGFLHSVLKDYELNGKTFHTHITSDHYAARVRNLHAYDSVSKDIVSRWAYPLCPDSNLVQGQSYRLGKGKIYKEEGVILARDCVINSKTVIGRGTSIGDGSVITNSIIGRHCQIGRNVKIDGAYLWDHASVGDGSVVHKSVIANEASIGRKCTIEEGALISYGVAIGEGMTIRGEHRITRAKRRRESDEELVRGSPDLGVVGKGGDGFEFHDSDEEDEDEVVDSLIPSGSMYNLANLSQESISTLNSDSEADDYEIRHDRSATSSFLSINSQDSQHAANFDHDASASIYDSLVEGHESANIQLELTALRMSTNASDHQVRRAVATSFVKRIHQLTKSGETIKNAVAQVFGQHEELINRAIFDKNQTDKADQVDLMLLLQADLSHKEGGDAILLSVATKLVELDSVEEEGMIQWWEDEKSTENDEMKKVREKTKSLIDFLQQESESESEDDSEEDEDSDLVPSSGGTGSYYTTTPPTTHKRKASGADIQLSPSEEPRKRTFKSPEPPTIDLPATPDTNASGNMDSDDDFNSSMSGEDFEDQDSDMDIEDDSDFDMDQDDVGFETQDKDIKPTKQAHEVDFKVFDPAQIQAQQDKQIDELSSILMQPPEASAILLRYMRWNKERLIEQYMEKTEEVLESAGLGQDAESNPPKLQRIQGFCCDICCDDSPDMDTFAMKCGHRFCADCYRQYLATKIQDEGEAARIRCPGEGCTRIVDSKSLDLLVAADLRGRYHVLITRTYVDDKENLKWCPAPDCKYAVQCGVKSKELNKVVPTVHCDCGHLFCFGCTLADHQPAPCSLVKKWLKKCEDDSETANWISANTKECPRCVSTIEKNGGCNHMTCRKCRHEFCWMCMGVWSEHGTSWYNCNRFEEKSGSDARDAQAKSRQSLERYLHYYNRYANHEQSAKLDKDIYLKTEKKMQQLQNSTGMSWIEVQFLDQASQALQQCRQVLKWTYAFAYYLARNNLTEIFEDNQKDLEMAVENLSEMFEKPIDQLQGLKVEMMDKTSYCTKRRIILLNDTAENLKQGMYNTTRDIQYSTDNG
>Arab_Me14_ctg01_-_Arab_Me14_ctg01g369t1
MDSNSAGGSGSSNSSDFVRKLYKMLENPSDESVVRWGNDGDSFVVLENEKFTKHILPKHFKHSNFASFVRQLNKYDFHKVRHNNEENGQSQYGPGAWEFKHPDFKMNNKDALDNIRRKAPAPRKPNQANSDDIGMPSQQMDMVSGQLMATQAQLHTLEQRYNELSIHHSMLLQEVIGLQKTVVNHEHVMQNVMTFLHGIDSQQRRNSKLLFAQNGAPAPGGNAEPPTQANDDDHPASPLQHASKLLSETNADVMLNPRNLEHMNEITMRMNGTLTTPPPDVLRAGTRPTSRGPPSATSTGSMRLENLDNLVYPVGQNNGIDPMYSEHINNIPYAMPPKAPEAGETKPVEVRKKGQFADPGWIRPPQILLVEDDPTCRRIGSKFLYAFHCAIDSALDGLEAVNKMNAGSKYDLVLMDIIMPNLDGVSACHLIRQFDTTPIIAMTSNIRSDDISMYFQHGMNDVLPKPFTKEGLLHMLEKHLVHLKKPSPHGDAMPAPQPVQVARQLILKEEDSPAKSPATVSNWNSPSQLPGVSPVGSNMTDEYAQGLQVQAPHHPGAYGVNTMQPPMGYNTSPQIALQARQQQQQLPPAGHRRQISDISGGDDMNNPAKRQQMYPPQMPPQINPMQPRPR
>Arab_Me14_ctg01_-_Arab_Me14_ctg01g370t1
MFAARQLLLARPVAGRRLFHASAPVLVKVGDKLPNVELMENSPGNKVNIADELRTGKGLIIGVPAAYSPACSENHIPGYINSAKLKDAGKVFVVSVNDSFVMKAWGKTLDPSGSSGIRFLADPSLAFTKGLDLSFDAASIFGGDRSKRYALVIEDGAVKEAHVESDNTGLNVSAADKVL
>Arab_Me14_ctg01_-_Arab_Me14_ctg01g371t1
MGKEGLRYAAKVDLDTPAADQKVLHNRWHPDIPSVGTIKNNEVVKIECVDWTGGQIGNNDSADDIRDVDLTKIHYLTGPFDIETAEPGDVLVLEIQDVQPLEEQPWGFTGIFAKDNGGGFLDEIYPEPAKAIWDFEGIFCSSRHIPGVRFAGLIHPGILGCAPSADVLALWNKREGELIEACAHTHDRIVAQPPQPKNAHAGSADADLKEKVGREGARTIPGRPEHGGNCDIKNLSLADGNNSEISFCGAIEMAGVITIKFSVMKGGVKQLDMKSPIYIPGPVEPQFGPGRYIYFEGFSVDEHGKQHYLDATVAYRQTCLRVIEYLRRFGYSDYQIYLLLSCAPVQGHIAGIVDIPNACTTIGLPVDIFDFDISPHLPAEKKDLGSCAFAGK
>Arab_Me14_ctg01_-_Arab_Me14_ctg01g372t1
MSNFDPNAILRGAQLTLVGVNRALQNPGLFTSSHYRQAALAVAAGVAIRILVSVPVVGVRVLLWIISLFVDMNHVTWDESIVDGLHFLEHTVLQVPFFLMTMMRYVTPTLDRMFMDSLQWVDHTYVQKHKSEDPHNLRAMYAQNLEQYPTHAPRDPNEKKKSIKDTVILLAVKQGRKAGISLAVLALSYVPYVGKFVLPAASFYTFNKAVGPQPAVAIFAGSLLLPRRYLVTFLQAYFSSRTLMRELLEPYFARVRYNKEQKQLWFKDRAGVLFGFGLGFYVFVKIPLVGVLIYGLAEASTAYLITKITEPPLPPSEAEKFKEDSLRWKNKHEFLELPWQHMDAHNINMHKPGFKSDVRQTPRKTFS
>Arab_Me14_ctg01_-_Arab_Me14_ctg01g373t1
MSSPVAPSRTAEHAPPPLHNARRSFTVPARLRSSPVPSPASTNSADGIETLVVCPHSRIVSFTAAAAAALAVSDQVGIAWRTPTERTLAVGVLRIYRVTASNVSFLNSGNLLHTIFPRSQCWCVDGQSVFVLRIRQDSYYRMELPFETEEDKEKVSQIKSVLGQVLQYEKTQCPFARNFKVKLPERPKTPPRERPTRRPTQKAKKWTFDKTWMPEDGLRPSTPVLEGSDSANTSSYEEDDRSSIHTDTSDVPVPETPETVFENTPPPKVVRRLSVAERAQLFQSPRSVTAPISTIRNRSASTASSMGCIPETTKEETENKSNVKRAALERKTSTDAASLLSSADSFYSLSAARRSPSPPFVDAEADILNPWVDTPLKQDDTRGRARHRRGVSELTVRATSADYVDKSVPVTPVVPLLPMTTPSIDVRPSSAPHTPPLVSDSDEDSLELPSLDVPTPPHMIRMRKLTGASPRRAVSPMPQPQNLCFPTKHKPHQKFTTALVRKTCEIVLGPPQHLVSLMLRIAASISNGFGFSTYRVRRTKSIPGSWESSGDEDEWEEDDFGIPLSNLGEPVSRRTGYPCELD
>Arab_Me14_ctg01_-_Arab_Me14_ctg01g374t1
MLLSNLTQTLDERRMTTQGTSPSHADLTSQPASLPDNQLDHGAQSDPQLHLELPAAARTCRLCSRGTFITDLHILHLLIKHVADNLSPIITTQHLVFNLIGIDTLELCAKLTMLPKTLARTYMLLSFDRVVHSCFLART
>Arab_Me14_ctg01_-_Arab_Me14_ctg01g375t1
MDFQSSQYPSSFAGFSTSAAHLSQTTTHSPQNSSFSQYTDPQARFAQSNNAFPYGGLPNGSQGASFPNSMQSGAMMQPGAAMSQSQLHHARAQLQQQQQQQQQQQQQQQQQQHNPYSNAPFSQTLPSPAHQQFAQNRQTASPALSNQGQPYATPLPQQSPTTLPSSNSQQQPMNLNLPSQIKGEPAQAQTPIKTVPQSPVSPVTPARAHERVAVLLEINSLLINEATTLQTQGKGGQIGATEEGKPQPSKEYIDYIRRLQANLSFLAQNAEKIPKPGQPVQPGPAIMSAPATHEELSKLYIKLQGLFPGWKGGQPPARQSPGGPQRMNSNASQPPNSAGLQQNWGQNSMQMQHGQQPKMEPQQ
>Arab_Me14_ctg01_-_Arab_Me14_ctg01g376t1
MYDCIILKSKSKSIIYVVFITLTAVVDETNAPPNTNRHTQYLVRLTSLLTSLSSIYPVLRLGSLNSKSLRLVLLTLRRLARGSS
>Arab_Me14_ctg01_-_Arab_Me14_ctg01g377t1
MSRPAASPWRSFAHRAGAATARRRCINIAATHASTEPALDQQTTIDAAATPVVSPDAHFEVIGSPFSLLSVSLSASQTLFTRRGTLVGLSGKSENTLSTLSFLEPFRRAPVGIPFLYQKLSSTTPLTALVSTKSPISSIVTVNLDGRNDWIISQRQALLAWTGHTLSLKPQYNVKLGLAHWGNTYITGRGLLALAGSGQIYQVQLKAGESYVAHPANVVAYTASATPPMPFRFKSSNFRLQVPDLGFGSFVQNAKFFRVMSQTTTWRAISTTYHTLKTWLRRSIWGDRLFLRFEGPTTMLLQSRASRVSDVLTLKDVNEIAESQPGAVQDAVDRKIKDEIKQIGAGTTAPGVQESSVGAVKYATIRSGKAVFEGPSTPAS
>Arab_Me14_ctg01_-_Arab_Me14_ctg01g378t1
MLIPPLARAASRPGLPPWSLSSLLRPHPLCHSTRVFTSSPLHRKHVHGRRTAPGSQQALQDTSPAKPANSPAQAKVDKSMDPLLGERNLTNKEQRKADWTIIKEMTKYLWPKDNYGTRFRVGLSVALLLSAKLLNVQVPFYFKSIVDSMNIDFAAVGGTATTVAGSMIMAYGLTRIGATVSQELRNAVFASVAQKAIRKVACSVYEHLLRLDLNFHLTRQTGGLTRAIDRGTKAISFLLSSMVFHIFPTALEISLVCGILTYQYGWQFALITSATMATYAAFTILTTSWRTKFRKQANAADNKAATVAVDSLINYEAVKYFNNEKYEVGRYNAALTAYEKASIKVATSLALLNSGQNIIFSSALTAMMYLACNGVATGTMTVGDLVMVNQLVFQLSVPLNFLGSMYRELRQSLLDMDTLFSLQKTNVAVQDKPDAKPLLLTKGEIKFENVSFGYRPDRPILKNLNLTIPAGKKIAVVGPSGCGKSTILRLLFRYYDAQEGRVLIDGQDIRDVSLESLRKAIGVVPQDTPLFNNTIGHNIKYGNMEASQEQIVQAAKRAHVHDTISSFPDGYETMVGERGLMISGGEKQRLAVSRLILKDPPLLFFDEATSALDTHTEQALLTHINSLVREKKRTSVFIAHRLRTIYDSDVIIVLKAGGVAEQGTHQELIDRDGLYSELWSAQETMFVEAKDEGEEVEKAERKKK
>Arab_Me14_ctg01_-_Arab_Me14_ctg01g379t1
MSDSEASSVSNFSMPPTSLPNGYLVRDFGYQTTSARYRGDHTPENNPDHDIDYDTPEYREIAMENARKSHAIYMGAVPEKKEAKKEGWMRFIPRKEMLPKKGKWMPW
>Arab_Me14_ctg01_-_Arab_Me14_ctg01g380t1
MMSVSHDKDSNSAEGPLRDSRQDPDNGLELYGTQSEREAEKESKSEDTMNPKKERLASVGGQGRTDRRTATGYMPIEDYGLIGNLRTCAMVATDGGLDYMCWPDFDSPSVFCRILDKDKGGHFTISPKHDDLCTTKQQYLPASNVLQTRYLKEEGVMNVVDFLPRPNSKSMDAEYHAQVIASKHTGDVPERSDLKKWLVRRVECMRGEVDVNVEVCPAFNYAQDKHTTEILSYGEQGEHEQRVVFKSKSLSLQLNTTIDCGEDDTSCPSLTFVKKPGTELGNAITTSFRLSEGQAVSFILRDADDHTPDHIETALVDKLQMDTVKYWNRWIGGSCYRGRWDEVVTRSLFILKMLIFEPTGAIIAAPTFSLPEDFGGSRNWDYRYSWVRDSSFTIYIFLRMGFSYEAEAYSSYMFQRIDEAKERKVGALPIMFTIKGETDIPEIELDHLEGYRASRPVRIGNGAAFHTQLDIYGELMDGIYLLNRFGRPVTYDQWLHVREIADYVCSVWKEKDMSIWEVRGQKQNFVYSKIMMWVAIDRALRLADKRSFPCPHRQEWFKVRDEICEEVMDKGYNKELDCFIQSYEANDVLDSAVLIAPLVFFIAPTDPRFLKTLDRILKPPEKGGLTSTGLVYRYNSAKADDGVGGREGAFSMCTFWLVEALTRAGAYDDKYLRQAVSIFENMLSFGNHLHIFSEEIARSGEQLGNTPQAFSHLALISAAFNLDKTLSTRHRR
>Arab_Me14_ctg01_-_Arab_Me14_ctg01g381t1
MSTAKLPKNFGVILFPGFQLLDVCGPLDALNVLSNSVPLNLSIIAATRNPVGTQHFVQDQQGSRFNLSIVPTHTFADAPQDLEVLLIPGGLGNRSDGNMKPVVDYLSSLGLGVHEESGGEGGGGSKKHLKGNLKWVLTVCTGSEILARTGALNGKRATTNKRAFNHVKEKHPKVNWVAKARWAVDGDIWTSSGISAGIDLTFAWMSEVFGEETAQYVADRSEYERNTDPENDRYAERWGAVQAS
>Arab_Me14_ctg01_-_Arab_Me14_ctg01g382t1
MKHERATLPTPTSSNSFWHSEPNEFLLGHRTTEQLPAEADIVIVGSGITGTSAARYLAEDERAKGKTIVLLEAREACWGATGRNGGHCQPLLFDRSAEVAAFEMKNVHEVRSYIKKHNVPCEWRDVSGCRSFWTEEVMSEAEKEIAHLEKIAPELRSLVTIIRDKEELRKHRVSPNAVGVTLSKGAASLWPYKLVTFILEQLVRAGQLNLQTNTPVNNITSTDGKHTLHTDRGTIDAKTVILATNGYTSALIPHFADLIVPVRGEMSALLPPKGNTILPDSHGMVGALGQPANNDDYLVQRPFEGVPNPRGHLMFGGGRGAGHLPTVGVSDDSIIDQDSAAYLRSALLKILELDGETEGLTELEAVGQWTGIMGYSRDDHPWVGKVPDREGLWLSGGYTGHGMPNTTLCGKAVVDMLLGEEAGQELGNLQSQMVQSGDIPSSYLLTKERIERARTFLTVQQQDEQGVHMNGVV
>Arab_Me14_ctg01_-_Arab_Me14_ctg01g383t1
MASGDTTSFQPTQPVRTSTIDSQKSINSSCQMSPTSAPTSPASRAFFGAITERLRERSRSRTHADASRKRAKSPMAMPPEQLPVAQPQPARQVSQVAAAQAPAKATRPALQHDGRRSTSSSSSSDPWRGRHSNEWLFNGFSVRDTAKGYFERRK
>Arab_Me14_ctg01_-_Arab_Me14_ctg01g384t1
MHTAGTLLARANQLYAANDIHGLHELYSRSGGFGGDPSSRPGSYKIIGICLAIASGLFIGVSFVIKKHGLLQANKKYNEEAGEGYAYLKNAWWWLGMTLMIMGEVCNLVAYAFTDAILVTPMGALSVVICAILSGIFLKERLSFVGKVGCFNCIIGSVIIALSAPEQSAVASIQDMKKWVIAPGFLSFAGVIIVACVIIAFYFGPRYGKKSMMIYLTVCSLIGGLSVVATQGLGAAVVAQASGSHGGQFKEWFLYVLLVFVVITLLTEIIYLNKALNIFNAALVTPTYYVFFTSSTIITSAVLFQGFKGTAIQIISVIMGFLQICSGVVLLQLSKSAKDVPDAAVFKGDLDQVRTVAEQEEPEYEPRADAIRGGSAILRSLSSARSHRELQEAKRIKEEHMQVIGEGEAVEFDGIRRRKTILDPSRPPTRTGTVVTRTIHPPLGMTHFPGEDSDDDNSSFHPGFFERLRSRGKSNASRTSSSGLGMTHLPPIPTDGASDHVDPLSDKDSYKNIPHQDTSYKPHEAHIQFAELPPIHQDDTLTPPKPPPHIAKRQFSFQNVFHRNRGDSEASASGSKRPVSRNSRKNSRDGAKAAPGTEEERLGLVKGDSSHLMRIQSHGSDELNPPGYSDDWGMRERRADSPGVSPSRLPIADAHSYSNRGGMEMPEMDPYDGGRYEPARKPYSGAFL
>Arab_Me14_ctg01_-_Arab_Me14_ctg01g385t1
MTDHGADLDVFTADIFTATSLADIHAGLAQLHRHEATVTQRLNDLVASQKDLSRDLARLDLLRAHLGSQAINTRAISNGMLADAASTANRISAAVKRLDQEQSNVKATLDVVDQVAELKACVLGVHGSMGAPQDWETAAAYIHRASKIPHDVVNGAFAEEIVPTAEVPDPPRVTLHAAAESLCALFLREFDKAAKDRDGSKVTRFFKLFPLVGRTDTGLDAYGRYVCTGVASRARTTFNSAAPAQRAEAFFYASTLTKLFEHIAQIVDSHEPLVEQHYGPGMMAKVIERLQIEADVQGGIVLDTWHEERNIDRKLTDIKSYAFSFLVQSFLAAQKPSSGTPRSSSPAGPPARTSEDEGVDMKEVDVLLGESALMLGRYALYSRFISDKCAPSQPEERIDHGLVMPHFLVNSNLQRKVTSHLVEPFNTMTTFFFRRSVEKAFQLDESPPDLTLNPNKPLGSSPPFVTSAVDDVMYIVNQVCQRTLATSQRAVVASVIPTVSRILGSDFIDMTQRKMRDESYPQPVRAGELPPEHKVIAFTVLINNLDIANDYIKRIVEQQLGRRNPESATSPLQDLFPFGHDAVFVETTLKSLESAFAKKSTELLNDGIIVLFSNVLKPRIRPILAEAFRDIDYAPPEVGDDVEEDDEDGDADLVKSRFDRGWGVVIRPLKRILTGANFDRLLSFALNYLATALEKRIKQYYGRVNELGAVRLERDISGIVTAAVAGGKYGLRDAFTKCTQMTLIMNMEEDEWDEVAADESGHGIPWVLDAEERKRVRAIVKG
>Arab_Me14_ctg01_-_Arab_Me14_ctg01g386t1
MRFQLSFTLLALLGLSGAQCPLYQQYSSQVHEPFSTGTHNLSYARPIPSCRTFISQEVEDEIKRMKTVIADPDLFRLFENTWPSTLDTTIAWRGWSNTTVEETELGTSEEAPQELTFVITGDIYAMWLRDSANQLQAYVSLLKPDSGFNSLASLFRGAINLQARYILESPFCNAFQTPDESGVVRLSSMNSDRITPPFDYFKVFSCQWELDSVASFLQLSVDYATATKDYDFFKKGNWSRAVETILHTAESMTMDSYDELGNWQRTPYTYCAPYGGTPINECAGSPHKGHIGLIRSYHRPSDDACTYQYLIPSNMMFSAALNASSLIMQQVTPPASTSNLTTWMQQMSTGIRNGIEQHAIVNDPKFGKIYAYEIDGYGSANIMDDPNVPSLLSAPFLSYLSSTDPIYLNTRRKILSKSNPYYAWGPVLTGVGSPHTLPGKPWPMANVMVILTSEDDEEIKSNLRMLVQSTDGYGLMHESVSSQMQEIWSRQWFSWANGLFGQAIIDLEKRKPWILKESFQ
>Arab_Me14_ctg01_-_Arab_Me14_ctg01g387t1
MDIESSARQLDDENGWSGRETFASSVKIGSKKPILNLEEIEHHLQDVQCGDQRMRLHFVDASSARDARAACHGGHGGLGGLIITSHEGCNKDGERAVYRVDDISYAEEGVALDLAVTEALWQDAFDNIDINFGHSQYDHIYRRHSDFSRARRKRQDNLTVEIPTDTPDDVTDVTFDLSSELLDTTFSATDFLTGIDSLVPVSGVAVPDPPIEIGCKNCSTRGQIILTQGAININTKQIDLVPDIFEGGDDGKEINSIITGGYMDLAVTGVGARLEMFAHPVSSGSYEIALFPLPILGFVIPGIGQAGASFEPKISVDFEIDGELAVNYGFDVAIPDGAGIKVELGDLTNTTITGIKGTTLNALPFTSSATDVDLSLSLAFAPTIPIGFDFSDKLSALVTVSMNLPRLDARLTTNAKDRCSLFDKGNKTKTDTKAKPKGADLSSLVLVEANVSVAIDVSADLTLPLLPAPFDSAGTSAQVFSTKMPLMTSCVTPVKGKLKITEMPPVATIAADKAEVKADKPCTCATATTTVYAAPPTGAPPPLEMTPYYPKAPPVETPSTEGEQPPASTALEMTPYYPVDTPTGGYGYGPSGQQPSPSPSCPSTQTVRITISTPPASTTEPPAPPPILIIPASKPCNSTTPATTILPPHSTTTPTSLPSSSSQITSTCTCTSKSPSASTTTTAPPKIEESKGFMAPPGSATDTDTGTGSATPTSTRAPDFTGAADRGAGVPALRWTGIVGLGLGVGVLMA
>Arab_Me14_ctg01_-_Arab_Me14_ctg01g388t1
MKFAAATTLFLATLALASPAPAPGPAVPETIPEFRAALTHLDARASKPKGSSGSSNTTNSAAVSVSASGALQLVVLGMGVVEAVRLWS
>Arab_Me14_ctg01_-_Arab_Me14_ctg01g389t1
MAPYPDTTPTETVPPEVVATAPPEDSALPGMKRGIAIGVAFSVGIIMAALLAFFVYRRRKQRAAKHTKLSAEEPVEMDAGGLWPQEKKRHVRVAPIEADAYSIHELDGSEIPELPGHYEGQELNANKKTPRASYGDDDTYGQKLKQWNDWSVALDSSHPQPAEEPLRHSNPYLEVSPSQSQQTSISPMGDTLLDAPSQNLSYNCVSPLALSPLEDAHLTPTYGRPTRQQRYYDQARTSA
>Arab_Me14_ctg01_-_Arab_Me14_ctg01g390t1
MASTTDPTVALPTATDTDDDDDDDDVISSLLPSQPPAATPPPAQPTAAPVPTPSLVETAIPGAPSAAPAPTAIPAPAPADPPASASASTSNSILPSSATEHADSLPSSSPTALRPDDPANDVGGGGISAGASAGIGVGVALMVCLVAFGMWFFLRRHKVRRTKTQSTSGHSTDEEHAQKAQKSEVYAYRAGGPAEVPGDEKPRRWSELESPTYVTEVGDGQVIRAELPGSTVPMATTGKEVDDRLFTDPPIDEVDEPVDVHETAIDKKDERLFSDPPIDDAIDMLDAEPRELEKQSG
>Arab_Me14_ctg01_-_Arab_Me14_ctg01g391t1
MQYFTILALAAAAFAAPLEERQAGLCSSGSPLCCATSVLNLAILDCQTPPTTPTGINNFIDICAAEGQQAKCCLIPILEQALLCTDVQPQAAAPAVSAA
>Arab_Me14_ctg01_-_Arab_Me14_ctg01g392t1
MAATQGHDDIVPKMDYHSSKSVAHSASDLEKQDAPQSDELQRKLSSRHLQFVAIGGTVGTGVFIASGSSINTAGPAGALLAYVFVGTLVYSVMMSLAEMATYLPIAGAFTQYASRFVDPSLGFAMGWIYWFSWSITYALELSAAGLIIQWWNQDLNIAIFITIFWIPISAVNFLPVDVFGEFEFWFASIKVVALFGFWIFAIIMNAGGVGPQGYIGFKYWDSPGAFAPYLADAPAVAKFVGFWAVLIKAGFAFQGTELCAIGAGESANPRVTMPKAIRNTFWSIFTLFIFTIFFVGILVPYDNESIAIGNTNAGSSPLVIAIQLAGVTALPDIFNAILLTVVLSAASSNVYSGSRILVGLAENGCGPAFLKKTTKRGVPYWSTAITALMGLLGYMNCSASGTEAFNWLLNIISVAGFIAWSCVCICHIAFMRALKAQNIDRDTLPFKSWGGAPMAWYGLTFTVIITLTQGFTAFVPWNVENFFIAYISLILFAILYIGHKIVYRSPLVKPAEADLVSGQFVDEVSETWEESSRSTWQKLMNKFSKS
>Arab_Me14_ctg01_-_Arab_Me14_ctg01g393t1
MISEGVQKLHWTQRIALVRHNLHAARRTGDFSFFKSLQAHALIEGTDHVALLNQTLGDSADGVLATLDNLNAGIAYVHQDAFKAIYDNAKNNMHVGEGTLASRRSLLRVDICQQRDMADHAIDKTTNSAINLIQAQPAHCQDAVANAWITGATIMADAVCVCLNEMNSLEDHLDDFISLEYSWNSIQNSVDAAISALRGIFSLMTTTSQPAAPHRNRNLSVSSASSQDHGSAASIRSRNSSTASAFSMIKRAFSVSAPSGPPPSKSARSSVNSGSLPLPDPNSRGFRASISAACPTKMPNFGDHPHTVLTTIPPTPAVIDMGSPDVMNPFKENPDYFAFDMGSSRKKEPEQGSADEMLHIEDLDPLYSPAVIEMPQPLKSRRLSESFDMSNPDGITV
>Arab_Me14_ctg01_-_Arab_Me14_ctg01g394t1
MISTLALALQLLITLRTISASPLPHHHKHAKRVTKGQDVGSGFAIAICVVILAGVFYYLGMRHERTRLWFSRRSSSATSTPVENDSTTPEGHGMKTRISCPLAVSSSAPIKPCDSPVEAPTQSLRYFELPIKEIHEMGQPSPRKPPPRASWLSLDRKPWWLRYPDDEEQKRSARTSRSKSMRSWFKSDRSTENVQVEVPSPSPVQVEVIRVGADSMKEDDKERRSDGSTLMDWAGLDYVRRIYVGRKSRVGL
>Arab_Me14_ctg01_-_Arab_Me14_ctg01g395t1
MTGNTQPNVLLFGAGGVGTVYLWLLSKSSTTTAVCRSNYDVAKEDGFIINSSIFGQGIHFRPNVVRSCEEAASANETPYDYIVVCSKAIPDTVPKWIAPVVTPGHTTIVLLQNGVGIEEEYRVAFPSNPIVSTVLYFPATQRPAGVIKHGEVERLEIGAYPSSASAEHAKAFAQLVQSAGATAILHEDIQLIRWTKLLINASWNPICALSFSKDTDVLESYDGAPDIIEAVMLEIRDIAVAYGYNITEEKVKFELNRAKARIPIHAGIEPSMLQDVQTGRRIEVEAIVGNPVRMGRAKGVKCDRLELLIQAALVFDIGPFPALLSWLNYTFLIALLLTTTPKLPNGPPITATSSKQLRFPAKMTTDSSLSLLFSIVAFLFECVVLLCMSPLIGSGPLQAVMKTAVRTLLGSPGKFEYLLELEYDDHIGDSPSNTWEACQYLCIIAIMSLPAAATYFIFSTCMFQWKLHSTRTDGPKSSEGSVNTLPTSQSPTILRSCCRTLRTMRRVAAETCLAIAHLVYMARAFHLSLNLRFKHLQSSWPNLSHTRTSNPSAAANVLPDNWGLFSLYQPPIEGRSLKKTYNKKAATKDTSIVDAVASDAMQLVSQTEKDISMADLSSISTPESSELFQSLLTAVSERANIVEASKQHRSIFLRMVEEKLTAITPLSVHAQDLHQCIWIQMLSSFYTELQPHCYLFQEHGDDVLMSLLRNICHFGNHLGLQFQPPNFTRPGTPPAATHQQPKGFVSTTGGQQAAISAVTFPPVQTQRLPAMSQQSPSGPRSGTGRLQAGTSVAVKPMDLGFAASTLNFGITEEEFTPARRKQTTAKQHRALRPTATRTSPKGAVSRSCPNQSSSHEPTFEEILEDQMIAEFSAQ
>Arab_Me14_ctg01_-_Arab_Me14_ctg01g396t1
MPVPSLYELARQRLIKNIDMLTDIGDIPFSFLEPVLRHIQNPTQLQELEEACPQIQGETKEIWKRYIRRDVPDWDKKPHTPRDDMNWSKVYRKLMRDAEKEKLDQENQLKEQMKALQAGRDVNKTVIMNTNKAYGARSSNFWASAGGSRGFGQPAPPTKTGKVAMDKLKRGMFDRNQARTKATQTPQHQLAMRRNMVAQIPERLVRMAQLEAPKTMVLSKQASASAAERRVPKPTTNQQHIKQRPAQMPQQSVAPPRTSLPAGQQFNAPKLKPTANGVGAAAAPKRKREGSSMFQPTKRRM
>Arab_Me14_ctg01_-_Arab_Me14_ctg01g397t1
MAVTDWSLLPQADEDALHNVSRLLAVEARPYQQVASRLLKENFFDHVRPKQLPSPPPDASAVEEAAASVFEREQQARKIETWRENIMNELSMLDYAILRFEFTTNSNHTERERYAVEKDGITAKQQHVRDTIEELRVNLVDAKETLAVRKTYDELTEKITSSKMLKPRDEQALAHAKLDEEIAELEHEVQSAKNTWEERRIQFGRIEEEAREMLRMIKDEKEEAERKEGMMKDGDEDGEGEGSTSRGDASHVGTPRPDGGMTPIHVGQSGEGSQSLKVPPQDRLKALSRDASVAPSPARSPGHEDTPMADSGVPSGEAQAEDSDGIDEGEDLEEGEEGEDEGEALSDKMDES
>Arab_Me14_ctg01_-_Arab_Me14_ctg01g398t1
MAPPSKLAVAIGSVTRLVKEEASYHKELVQQEERIKKLEASEGDENKEYTMRQEKQALQETRNVLPAIRTRIEQAVEKLEEQLESRKEADGDASSEEIKKAEDAIAAGKKVVAEGS
>Arab_Me14_ctg01_-_Arab_Me14_ctg01g399t1
MSSPTKRRTQRSSASATPRRTARNSQIPSSPAPMGAEDQLQTEASQASSRGLLATPSGSRLQAGSTQSQSPLFFRSSPVIGSAEDANGAGESNGGATPKASAMNIGDSSPIHYASSSSPGRARNAQNTDLRSSSSALFVRGSESAARHRRSDIHSDVFGASSAGGQRRRLFVDEHGMPVGDASDAATFSNMNPDTSDADALGGNTSRIIWGTNVSLVDARHAMKDFLMNFQRKYRLIQEGELEEGMSLPAEHPAMAREYVDMMKMMLELGITPLNLDARNLKSYPPTRKLWHQLQAYPNEIIPIMDVAIKDVMLELAEKRMAEMRVQLSQQQRGGQPRARDSSSLPPMLSSDAPTPGAPSPAPFADTTNLVSEVDQKTYNVRPFGLDNTINLRELNPGDMDKLVSVKGLVIRTTPIIPDMKDAFFRCAVCNHTVRVDIDRGKITEPTRCPRAVCESPNSMQIIHNRSGFANKQVIKLQETPDNVPDGQTPHSVSLCAYDELVDVCKAGDRVEITGIFKCNQVRINPRQRSVKNIFKTYVDALHIQKVDKKRMGIDASTIEEELAEHAAGDIEETRKVSEEEEARIKATAARPDVYELLSRSLAPSIYEMDDVKKGILLQLFGGTNKQFEKGGSPRYRGDINILLCGDPSTSKSQILQYVHRIAPRGVYTSGKGSSAVGLTAYVTRDPETRQLVLESGALVLSDGGVCCIDEFDKMSESTRSVLHEVMEQQTVSIAKAGIITTLNARSSILASANPIGSKYNINLPVPQNIDLPPTLLSRFDLVYLVLDRIDEQADRRLARHLVGMYLEDVPENASKTEILPVEFLTGYISYARSNIHPKITEPAQKALVDAYVAMRALGADIRSQERRITATTRQLESMIRLAEAHAKMRLSEEVTADDVNEAVRLIKSALKQAATDARTGLIDMSLLTEGTSTSDRRRKEDLKRAVLAGLDELAGAGQSVRMSELVKHIREGASEQVENQEFLEVLRAAEAEGTVQVSGEGPRRTVKKIVGTF
>Arab_Me14_ctg01_-_Arab_Me14_ctg01g400t1
MSDSEQRSEAAIAKKLQDVVISLHKAGNTDDLTVKRVRTRAEEQLGLPAGFLKAADWKQKSQDAIMEAVDKYCGDEPEPEPVKAAPKASKPKVPAKKPAPAGDSKQGAKRKAPAPKKQPQKRRKTTSSEVELSDELSDADSEPEKKPARRAKNVVEEDSDEEEAAPKRPIKKTKPVVDDEDDSDAEPTTTPPRAANKDDVSESELSSLLDESPAKSKRQKKAPAAKKKEPAKPKPKAASKAADDPDQAEIKRLQSWLVKCGIRKVWSKELAKFDTSKEKIRQLKEMLSDAGMDGRFSDEKAAKIKEKREFAKDLEAIQEGEASWGNTEDTGGRPRRRAAARPAAPVQKIEFSDDSEESEENNDDGDDSSEDDLTDDDGDDGKGASEDDAGDDSAADDSE
>Arab_Me14_ctg01_-_Arab_Me14_ctg01g401t1
MSSDTPTKLVREKQNEGRLLLVSNRLPITIKRADEAKYEMSMSSGGLVSGLSGLSKTTTFQWYGWPGLEVPENEVAGLKDQLKSEYNAVPIMLDDELADRHYNGFSNAIMWPLFHYHPGEITFDESAWEGYTEANRLFAKAVAKDVQDNDMVWVHDYHLMLMPAMLREEIGNTKKNVKIGFFLHTPFPSSEIYRILPVRNEILLGVLHCDLIGFHTYDYARHFLSSCSRILGLATTPNGVEFQGKVVTVGAFPIGIDPEKFDEGLQKPKVQERIAALEKKFQGVKLIVGVDRLDYIKGVPQKLHALEVFLTEHPEWIGKVVLVQVAVPSRQDVEEYQNLRAVVNELVGRINGKFGTVEFMPIHFMHKSVSFDELIALYSVSDVCLVSSTRDGMNLVSYEYIATQEKRHGVMILSEFTGAAQSLNGSLIVNPWNTEELADSIHDAVTMGDEQRNLNYQKLSKYVRKYTSAWWGESFVNELRRISQTADRKVRFNTPKTEESPAVQDNGANAASDVKEDTVPAKDKEADPATAVKTCEENKQDLPIRSKESES
>Arab_Me14_ctg01_-_Arab_Me14_ctg01g402t1
MPTLTRIPLAAVVCPSAPFLAPRLLRATVPLAVPLAAAVAPLAVAALQSSQQQRGFASTPRCHANAAKGKKSGRSYFLEMRKREQQQARRRERGDKDPAELSPEVVQLALQLQQACEARHVQQLVDLYPVALAAGIVDSSCTRIICQALHAAVRRSAAKKDSSKPSELLPFVELLIADLRRGALPPHPYAYVHLLGIYKHTKRFHDGRALWLWLAEQDDAHVSQAAYGAAIELMAYGGLMSLPELELLYQEGLKRFPGTYAEYHLSPDAIIPDRTQPVHILGLPTTLLQGIITARLMSRDWRKAYLGLDTVLRLYPGQTPHRIFELFITERPLSEAYTAYLLACRSGVQISGGQVTNLLNRLRVLMPQAHAQADRFTILRAMANALYAYQQCGAGLSSVHVGQFIKAFEFVLPDKAPGQDYTDEEAGLRDTIALAAHQSLAGLIQSGLSPDFHPFVSLVSLAGKLRAPDLLKLTLADAKTAGIAFGPIERRVLLTAAGLIKDRNLIQALWSLTVTSAEKEGVLISYNDWVTLAKACRRADLLPYFDQQLQEQAHAVTTHIEECVRLAATNPEPDEAKSSIELMTLEQLNTEIKALQAQMENMRAVLMSGQPLNPQNSPFYMHIDPKQPSLGTEEALRAVYDEFTTDPHQPPAPAPADGSPAKSTTTALSKTGIPLDELRFRNWVNVHEMMSAASAYETSRQSIVDKAIAQRKSPKDIPEILHLRTDIKPAQSQVDLANRIKELRTPDQVFRRIGSEINDEKFNPMVHDPEANTWRKPTMEKHSARDVSVRKHASIATNPFPDPKPADPPASRWYKQKSPKA
>Arab_Me14_ctg01_-_Arab_Me14_ctg01g403t1
MSRPLSLFSIQAILILAIDDGSRILTKYYSNPHPPQGNQGDYPGQIAYKTVKDQKAFEKGLLDKTAKQTTDIILYDQKVVVFKMESDVMLYVVGSAEENEILLYSVVLALRDSLNILLKNSVDKRTVIENYDLVSLAVDELVDDGIILETDPVIVASRVSKPPAQDMTSMKNIDLSEQGLMNMWDFGKRQLAERIRQGL
>Arab_Me14_ctg01_-_Arab_Me14_ctg01g404t1
MKQRFSSLDVKVIAHELSKALTSLRVTNVYDLSSRIFLIKFHKPDHREQLLIDSGFRCHLTEYARTTAAAPSAFVAKLRRYLKTRRVTSIAQVGTDRILEFQFSDGLYRLYLEFYAGGNIVLTDGDLNILALLRNVEEGEEHEKLRVGLQYNLSLRQNYSGVPELTKERIRQGLQKAVDRQQEQPAGNAKKAKKAGKDALRKALATSITELPPLLVDHALHVASYDSTLKPEQVLADEGLLDGLLKVLQDALRMTKEITEPDQVKGYILAKSNPAAPSAEEEGSEKGRLLYDDFHPFRPAQFENTDLTFLEFDAFGKAVDEFFSSIEGQKLESKLQEREQHAKKKLEKARKEHEERIGGLQKAQELDFRKAEAILANVHRVTEATDAINGLITQGMDWVDIGRLIEREQSSGNAVAQLIKLPLKLQENTITLLLDENTWTEGQDEEDEGNNTSSVSEDSDDEDDGNKKKAAPVKVAAQPKLTVDIDLGLSAWANSTEYFDSKKNAASKEERMLQASERALKSHEKKVAEDLKKGLKQEKEVLRPVRKQQWFEKYIYFISSDGYMVLGGKDAQQNEIIYQRYLRKGDVYVHSDLKGSIPMVIKNNLNTPDAPIPPSTLSQAGNLSVCTSEAWDSKAVMSAWWVLADGVTKTGQTGEFLPPGVFNIKGKKEFLPPAQLIVGLGVMFEISEDSKARHHKHRVQGGLVPTTAEAEAELAQEKKTAQAGETADSDDDDDAFPDAKMASDSEEDFPDARMDDSDESDADSEAEAPSNPLQSKTADQKADSEDEEDGVPSPQSEPVAATSENETAQTQEKDKTGDKSGIRHLSARERRLMRKGQLPDATPGSAAAEENDDEGHSAGNESKPATRAPGTVTSQATKNSSAPLPRGKRGKAKKLATKYAAQDEEDRALAMRLLGSKSGQVAAETAANDARKKEEEALANKQRRREQHQRAQDKGKAAEEARRAALENDDEGEDDESLKSSLLNLDAFTGRPLPGDTILSAIPVAAPWAALASYKYKAKIQPGSTKRGKAVKEVLSIWDHAGKDARATDRHSQDVERIWPREMELIRGWKEPEVVSVLPVAKVRVMIAGGRRGAAAAKGKKSARGGRGSKKSK
>Arab_Me14_ctg01_-_Arab_Me14_ctg01g405t1
MPSATFNPRQRLSILTNSTLGHDVSAAFKASSESLTQARSNQYGETAAPPPSPIDFSFPSTPKEDRRGSESN
>Arab_Me14_ctg01_-_Arab_Me14_ctg01g406t1
MIDKISQLQGNWLDTQHKYSGADMSELKPFDPNVPQEEVDRLFRKLRDTRPSLEWINKLKNFWQDKYSWPDAQKQISEWHHFTTEMDNLKVHFIHEKARKRQKDAIPLLLVHGWPGTFFEFQNVMHPLLDPKDDAAPVFDLVVPSLPGFCWSQGPPRGWTLQDTARIFDVLMKRLGYNSYAAQAGDWGHWVVRELGSGRYNACKAVHTNMCPGAPPKGYKMNEKEQAAMDRAKWWMGEHLYEGHMGYAIEMRTRPQTIGVAFNDNPVGIMMFIGEKYDELADPTIGTATLDKEEYVRDVCTTLSLYFFTPPSIMTSMLCYYNNVRHEVYTEFNAKEENLIRVPLGVSTFPYDAFPVPKAGVETTATNLKFFREREHGGHFACMEMHEEMVTDMRDFFGEFYKA
>Arab_Me14_ctg01_-_Arab_Me14_ctg01g407t1
MRDDAAELSGSALLTTTSAPSAPHTPSSATVPALKSPTTRAWLSSVRRPRTSPGPGASALKRTLLAEDDDRRDSALASSNCTATSNELSSPASLRRTPSLPAIVVQDEHVVGSRSQSPRHSTSAGESPFHGIDLVIPTGNFDDFTSPAQVSFSKRGSMMLGGRKANRRSQQTNLLLEGASVPTPTPSTPPRTERQEPSNEQQHALSPPAAIPNATHLSPTPRSPSRFSARGRAGHRVLSTDEMMLSRKVRSMYKHGNESDVNWETDTSSLPDTSVDNSIAAETPANASTLTVNRKRDDSSSLMSAARDDNIPKEPTERAGGLEDWADLEGAEVDRYGFIVAKKPGSREGANGEGVDGPDEPRIQRVSTALQLVSEEPRRRGIGRSISRAPSSRSANPRGSPPKRRVSQKSTKPTRSIFSNQTSGTQTSHHPLRHATNRLPHNRERRILEEASDMLKLPPGLAQVAEQREGGRMARSMKAKEIQRDEKWRRMAKVVKTGGATQGGGMLFEFDTKDPKLVTRTWKGIPDRWRATAWYSFLAESAKKKPDSPSEEDLIGSFYELQTESSAEDVQIDVDVPRTINRHIMFRRRYRGGQRLLFRVLHAMSLYLPETGYVQGMAPLAATLLCYYEEDRAFVMLVRLWMLRGLERLYESGFSGLMDALDDFEKNWLRGGDVAKKLDEMGITSTAWGTRWYLTLFNYSLPFQAQLRVWDVFMLLGDASYSNSSTSKFSGDLDVLHATSAALINATREILLDSDFENAMKVLTSWIPIKDEDLLMRVARTEYKLRKKRASA
>Arab_Me14_ctg01_-_Arab_Me14_ctg01g408t1
MLTLSKPPKWDFDVKTHDYPPPFSASSTTIRHSPKLNGGPSPSHLAGPNYAMSTSHRGLPPPSAMTLPDPGRGPPPIQSSMGSSSLGALPSAPTQWQGSEDGMKNWLAAKAEEEKRRQEEEKTRQENLKLEQRKIEHSMLRESMQGGIPPHLVPIIFAGIGGGNLANISAEWIQQYTAQVQVAHQQAQAQAQSQAQLSPELRRDTRLLGQQAQTVYAGQPPVSQTILPPTAVLPGQPLPTQSQHTSAAYAGERTAPAPGQAGPPTSGSRPLHQSQLPKLTTNEMHIQQPPSAQSSVQHLQNQGGQEQSSPSIYFHHWVPPASQQEKSSSGHPPATPSGKCKSSPSTSYQSRQRATSHASDREYISSPNKKRKAQGPHAAPPPPTSAPQSYTSPSFSHVSTSSTSTPGRRGHARARSDASTRGAEASMSRRSTVSGLAHETRQSDMRDAPRASEGRQPHNPDAPYGTPPQRSESRGYVQQSPGPRAGLGQPETPKFGSHQQWSRGHDTSPKREADH
>Arab_Me14_ctg01_-_Arab_Me14_ctg01g409t1
MPATDADTGAEYELLPARRSSSTSNLSTRYAAFHRLASPTMSHALRTPPLANTRTQNRSGKATLADGKQVSRIKERVEEKEGIPPAQQRLIYGGKQMYIYTQCAQRSREADTSIRADDKTAADYQLEGGATLHLVLALRGGC
>Arab_Me14_ctg01_-_Arab_Me14_ctg01g410t1
MISWKARRPRQRRPQMLGRMTRDHRRPSAVEKKEKGPGLAERVIDVRSELDSWTGFAHLIPPYSSSKLDARDVHQIADTRVRKKTRCTGRCPCTLCLRAGLSCEYTAQYTRGRLPSVMVDEAAMTAASKAGNTMLNTVPVEDNPLRDLPSFQYAGNGLSTPSAHDRPILERVNRVNGNHEDSNRDPPSRTSPEPAQAQTDSQGHYVGSSSGVSFLIRIQKRLHQNTPTPQDSSIFAWGDSPLPEFDPTFFVLPPKPDAQRLVERYFDYAAPTHRFIHRPTIERWVHEFYETRGDMHAKEDAAAKTALLLIVFAQAQAYMPPGSTTRENSARYFFAAEHQLSKERGAVRLASVQARLLQCFYLLTQSRINHCWSLFGTTAHLALAIGLNRGRRYDPSGTVDYVELESRRRTFWVAYSLDKYLSAALGRPRTYKDEDIDQELPTVVNDSDLHPQYISPSTSKSPSHMMAPVEHIKLTRIVSLVLRDLYPIRPPSLALRIELSAKYTKELDIWRAALGPFLDAAGIESSLLIPIYQRQRGVLNLAYYHAMLLIHRPFLLSNFANLTGIRSHPSYQAPADTSANIASCLDAAMNIVRVVDDVFTSSNLFRAFWFTQYYAFCAVVVLYIYRIRQHLLTPGQCEEYFDAGQKCQRQLESISETDCLARRYCVVLEELRLEAMRQTNHQNRSGGIPRTAPLPVPGTAVTQQDQASSTVLPLPETRPQNGASPDLTASFYNNVPQTPDSTVFNSSYLPSNSVMADLTSWGQFDSLVTAGIGIFDGGFQDDNFGLGFNL
>Arab_Me14_ctg01_-_Arab_Me14_ctg01g411t1
MPAVIREAGLGGFLTLEARRWNQHDNKSLLSPTTLAFLIPVLIVLFAAPFLCVFCIRRRQADRPVRRHGAVKAPALQRSEARERLELVTEVLTVIQNDEKAACVDRLEKKAHSDSPSILEKECAICLSTLHAPSPPEPAKVSNGNGLVDEAKVETPKLVAEREEILRLKECGHEFHAECLVSWVVLHKKSCPICRTVYYHDEPEKPTDIEAQTQASVREQPATIEPVSSTQPPVSNWHYFWTGRNLSQQHTQPGVRSSWQQFRRFRS
>Arab_Me14_ctg01_-_Arab_Me14_ctg01g412t1
MGEKQPSLEGHKSGQSNEPLSAPAHALSFQQVIEETKCNPDDGLTTSEAKSRLEKFGSNDLGDDGGVQPAKILLRQVANSMTLVLIAAMAVSFAIESWIEGGVVTAIILLNVVIGFIQEFNAEKTMDSLRSLSSPTATAVRDGKTVTVPTIEVVVGDLVELKTGDTIPADIRIIEALNFETDEALLTGESLPVNKEAEEIFSEDTGPGDRLNVAFSSATVTKGRARGVVFATGMYTEIGSIAMSLRQKGSRVRPVKRKEDGSRPKPHRYAQAWGLTVGDVVGAFLGVNVGTPLQKKLARLAILLFCTAVVCAIIVLGANSFSNNREVIIYAVATGLSMIPASLTVVLTITMAAGTKRMVQRHVIVRNLKSLEALGGVTDICSDKTGTLTQGKMVAKRAWIPAKGTYSVGVTDEPHNPTVGSLSFTPKEPRHIDPDQDEKTQPYEELIENNPHLIEYLKIASLANLANVHQTDGQWNARGDPTEIAIQVFASRFDWNRLQFTQGDSPKWKQLAEFPFDSDVKKMSVIFEEVSSSKKMVFTKGAVERVIYSCDTVYNAESDDSVTLDDDYREEILANMEALASYGLRVLALASKDYDGPLPTKGEDLDRKNVEEKLIFRGLVGLYDPPRPETAGSVRQCQKAGIEVHMLTGDHPGTARAIAAEVGILPSNMSTLAKDVTDAMVMTATQFDKLSDDEVDALPLLPLVIARCAPNTKVRMIDALHRRKAFAAMTGDGVNDSPSLKRSDVGIGMGTGSDVAKDASDIVLTDDNFASILNAIEEGRRMFDNIQKFILHLLSQNIAQACVLLIGLAFKDETGLSVFPVSPVEVMWIIMVTSSLPDMGLGFEIAAPDILDRPPQSLKRGVFTIEVMIDMLFYGLWIAALCLASFSIVMFGFGDGNLGTGCNEGYNDTCDTVFRARATTFACLTWFSLFLAWQMIDMRRSFFMMQPGSNKYFTQWFHDVWRNKFLFFSIMGGFITIFPVLYIPVINTVVFRHTGISWEWGVVFIATFLFFLGIEAWKFAKRLYFKKKDPNNGRRGSIDLEARVFERYLSTAISTDDDNEKK
>Arab_Me14_ctg01_-_Arab_Me14_ctg01g413t1
MILLTSLCLLSSLVAAQMIGRYNASDDQNSSVISLVNGRIFTPGLAIIASPQPNTPMGGDFLHIALDISGDGALPFPPSSNPSASTRFHNVNLFLTSTTIDKNFTISNGTTSTPPLSNILEQETGSTVKHVNFEWPLCLVGNGKDAKGTARGAYNISIHQSFRLNGSDFYTIFNLPIEVTNNIEQFPGARQLLTYPKPGPLSANGGRMECGTLANKVRAEDELKGSVANPESQPFGDSGKLDVGNTGNGGGQSTGNGGGQSTGNGGGQIGGSSGGPSGGSNDGQGQIGLSVGSAVRVGVVWTMLLAALVACSQS
>Arab_Me14_ctg01_-_Arab_Me14_ctg01g414t1
MAPFDSTTPETRFDSFDVYRTSYKKVNEQDVEVGILVPKSLRPGTHPVLVKFHGGGLVTGDCLYAPWFAAYFVPLIHRTNAIVVSPNYRLVPEHSGADILEDLADFWTWFRSGGLASYLASQGVAAELDFDRVLASGDSAGGYMALMSGLLQPKGSIKAVLAQYPMTDSLRREPSELFVDLPSPPAGLVDEHVAAIKPGIVVSSCVPPARMNLSYVLSAYGRYLEFFGKDKAMWPLYLVDEKRWLPPTWIHHGDVDTAVSIEDTKAFVGKCEKIEGVEIRLKIIKGQDHGFDTQAKEEEEPWLKEGLQWVEGKWLQ
>Arab_Me14_ctg01_-_Arab_Me14_ctg01g415t1
MTSASTSPPNGVFVPVPTFFKAAAESKTLQATVDVQTQAEHSVFLAKNGVRGLVLLGSTGEAIHMNRQERIDLISGVRKGLNDAGFPDYPIMAGTLINSVDETLEQLEDYKKAGAQWGLVLAPGYFGAAASQEGIREWYTVVADASPLPILIYNYPGVTNGVMVTPETYRILAQHPNIVGCKMSHAVVSWHNQVSLDPKIDHSKFKVYSGLGQQLGPIVIFDAAGVIDGLAAIYPKTVCSLYKLAEARPISNENLEKIKKLQYIVSTTEEYIGKYGIVGIKEAVKRVTGYGTLEGGRLPIKGKLPEGEWEKWSEAWERIQQAEDSLSEKDFK
>Arab_Me14_ctg01_-_Arab_Me14_ctg01g416t1
MGKIAKIEYFRVPPRWLFVKITDEEGNFGWGEASLEGHTQAVEGCLDAWGERYTGFEADEIEHIWQMSWRTSFYRGGPVFMSALAGIDIALWDLKARKLNVPIYQLLGGKVREKLKVYAWIGGDRPDDVKAQAQARKDQGFTAVKMNATEDLHWLDSPRALESAVARLKTVKDLGMDAGMDFHGRVHKPMAKQLARALEPHHPLFIEEPLLSEHIGGIKQLSQTTTCPIALGERLHSRWDVRPFLEENCVDILQPDISHVGGISEMKRIASMAETYDVALAPHCPLGPIALAACVQVDATVANFAIQEMSLGIHYNAGSQDLTSYTKNPEVWSVKEGYIELMKGPGLGIEIDEEQVRRLSKDAVAWVSPGFIGPGGEVREW
>Arab_Me14_ctg01_-_Arab_Me14_ctg01g417t1
MSQPPPIDPRWVAMREKHQEEVGAFARSVATAHKDLNDYVEAAHKSLLKRHSQQERELYGLASSISSRDISVTHSVAYKTQPTASKMSLAPAYTSQKPLPMPGPERKQHSSGQSTALSTAQGSQRQKDQATPSAAAPQQLVKQQMKLLPQSLQAQPQKNEQAPSVSPKGQLFKPGQYKPSVTSLRRQPGRTNKYEIIDLCSDNENDDDDMIVEVRRDAVQKSTAVSTPVLPSIPTATVQLFGESSKKKHPMSKPPHIKRENGEAGRSTQGQPRLPHHARVSNHRPVTNLAPVRLPHSDQSRDSTALNSLSSPISRCTVSSQHQAQAPPQPAHENALSSFDRKNKTTPTNVVVQDMNNLTVHQVVVPGNKDLLALHHHKQDERTKSIAPSSSDMFARKDSDDGVDIEDVPMAYLNIKAILNQRSMTVSSNDSIGVASSASTVANPSIFTNDMQKMHPPTPPPSVASAPTTCQAAEAGTLLRAFKKPLPAAATPRTLDSAQIYTSTSRSPGSTLSANRLPDKLLIHQRGTSVASRTSETLGPSRKRKEVDLDDYEQFTYSRSGSPFTDRNKPSILPDSHSKRSKITASATSKPNGPPPPSASSVTPMSRGKNGFGFRTVASSMPMTLSQMPSAKSKLSEPQTPIQEYHCRKSQIATISLGKRSAAVRAQEKIRKISDADEEFHTNDQIFQATAKEVRMGATVTTDLGRRLRSMSSTPVPAGTHSNIPKNSTLSDVRTASAKPAARTKTNRSVYAKEGSLSNRATEARPAARSRNISQLIGDDFDKDFEGDLDISEFTYVNGIIIQTG
>Arab_Me14_ctg01_-_Arab_Me14_ctg01g418t1
MFGPFRLTNPLSGGLLWKIPWRLSRHQKYRQRERLRNVDGIVATLDNALARTGLSMKKVDRWKMEMPTEQEMLPKDKYTVFDRKVKRYRKGIHKVPKWTRVSQRLNPPGF
>Arab_Me14_ctg01_-_Arab_Me14_ctg01g419t1
MSYTFSILSPLDVPLFTHDFGTSRSGGDGVARFTPSERALVPFILHSALDIVEEVQWGPSTSSGSAPMYLKHIDKYQNCYISCWITGANTRFLLLTRPRDESLGLTGSGGGARGSLAGGRAALGGGQGLYNPTSPATEEAVKNFFVDVYEAWMKTIMNPFFQVGNGDVVKSPVFRQRVAAAAKKYL
>Arab_Me14_ctg01_-_Arab_Me14_ctg01g420t1
MASHDLSDIKTPPSCTADFCLIPLGTPTASVSKEVAEVQRILKRSGLSYSMHSAGTTLEGSWDDCMRVIGQCHALLHQNGVVRIQSDIRIGTRTDKKQGFKDKVAAVEKLLEGDN
>Arab_Me14_ctg01_-_Arab_Me14_ctg01g421t1
MAFNFNWSPLLADTSRARDMLTTALNKSPKPPIIVDDIIVTELNLGSTPPELEILEIGDLAEDRFRGIFKMSYTGDAFLTLKTKVQVNPLKTHLSTRPDFASPQPLAAASGLTIPLSITLSNFRLSGFVILVFSKQKGLTLVFRNDPLESLKVSSTFDSIPFVRDYLQKEIEGQLRVLFTEDLPAIIHRLSLRLCSPEFQEIETEERLDSTKDSATAVDPLATPPQDAVDAFGNPLDESQISEIALDPVGEIHASFSQKNILRLAALSESQRTLSLFTPGIRDAVFRAWAGPDRDASGTAMPALTRGSLSRIQSTFGSMRSGASSVASGSQGTHDTHDTHDSRPTVSSTYSMSGLTLGAGRSRAGGMRKRKKRVVDLRKKPDGATGEMASTDAHSEMASTYASETSSVMHEEREAGEVATPPRSPVHPGLRHDGPHGVLDHGEPSRLVDNTASTETLLPAAALLSEPPRTARSTSKQRDAYNDETIKPRASSKRPPLSHNQILQAQKSTSPLLRSLSFDKIALTSPPNETESTGGILEQAWMMKIAQEIARKVQQEKDRDGSSRDRSPLARSSKARTGGIWAAEDELEAPPAYVA
>Arab_Me14_ctg01_-_Arab_Me14_ctg01g422t1
MAASHFEAKVKSVLSGDTVVLHNIGNPKQERILSLAFVTAPRLKREGDEQFAFESRDYLRRLLVGKVVRFQVLYKIPTGANREYGIVALPDRTVLPEQAVAEGWLKLRDDAGRKGDSDEDAQLLEKLQVLEARARADSKGLWAETGGRINSSNELSNPQQFVDENKGKELDAIVEKVLSGDRLIVRFVLSPTEHIQTMILLAGIRAPSTQRTNPSTGEVQTAEPFGDDAQLFVETRLLQRNTAVSVLGLTPNGQIVADVKHPTQGSITPHILKAGLAKCTDHHTTLLGAQMASLRQAEKFARDRRQGVYQGHVAPKANAPGELEAVVSRVQSADTIFLRNKAGAEKRINLSSVRQPKPTDPKQSPWAAEAKEFLRKKLIGKHVKFHIDGKRPGTEGYDEREMATVSLQGKNIGLLLVESGMATVIRHRQDDTDRSPIYDDLLLAEATAQEEQKGLWSPKAPSAKQYVDYSESLEKAKRQLTLLSRQRRIPAVVDFVKSASRFTVLIPRDNAKITLVLSGIRAPRSARNDQDKGEPFGKEAHEFASRRCQQRDVEIDVEDCDKVGGFIGTLYINRENFAKTLVEEGLASVHAYSAERSGNANELFAAEQKAKDARRNLWENYDPSQEDEYEDTTAAATQTSNGDAPAASRQKDYRDVIVTHVADDGRLKLQQVGSGTSALTSLMSAFSKFHLNPANNKGLDGPPKTGEFVSAKFTEDDTWYRARVRRNDRDAKKAEVVYVDYGNSEIIPWTRLRPLGAEFSNTKLKPQAVDAQLAFIQLPGNPEYLNDAVQFISQETAGRSLVANVDQVDKDGLLWVTLFDPKESKSGNESVNADVIEEGLAMVPKKLKAWERSASDVLGALKQKQDVAKAERRGQWEYGDLTEDD
>Arab_Me14_ctg01_-_Arab_Me14_ctg01g423t1
MVPNMETISRLPRRLTQLYSDTKIHCDAVVEQDVQDTQSHVLHRKLRIQKDRLITWGVDWSDNAKGKNGDIDESVEQAGLTETVTSVLGTIKNILDEAEHMHPGGAPAAGKTLSEEKGRLPASDTSAWAAADRSRYEDLISDLTTSIDILYDLSRSRRAQRGPAADVKAGPEPPRPSAAAAIFSKPEYSASDLTLVNPATFPLNAHALHAAARFHLPPKLNTSDLVLPEEEPPPYESVGASSIRVIGRLRSRNSSTNPWRTDGSRNIEQPVLIEYATYDPTYRFTEVSPPTDRLDTLLSILSKLSNDHPHMATLRCLGYFEDPKQPRFGLVFELPSSTYAGASDAHKTIDELRPVTLLSVLQTGSKSLNNSNSATPPLEDRFRLAHSLAITFSKIHGNNFVHKDINSSNILVFRKNRRQSANTRALQYALRSPVVCSFDLFSEYDIEPTYTMPTLNIYRHPEDPKFTGLKERHHGPQFDLYSLGLILLEIGLWQPLADLWKPKYTLADFKQRVEDVYIRRLASKCGTAYMQVVRDCFWAVDRTENGTETLHEFAQLYNRIIIRLQRCCMLDESEPGFDLHGARPGPMPLISPTHLKRKSVSQPQILETPTSPSYKSAKRWALEKGSQALERTKSLTKSSTKKSPDPSALSRNPSQRSQHSIRKSISETMGLGSAREESMASMDWEPHDQGSLETSGTLVPTPQNSQDRSEVSSLYREQITTAASIIQRAWRASRTQPSNANMTLNDYKEKITIIQTAWRERKQKRAHSVEALFTDGIRHWPQATLGYPTPEPEVQDAGVVERDRCITSSIQIQTNVEPPPRSKLRLHPVKFTPAIVDEWHATMLPRLERLIERALRDSDETISIDLVAIGETQEKARPTVFITCSSVAKIKAILSRRFRYDAHVYDLKVRRGKVRRSKMSRSPGRVRPPHRSMMNTENYNADMAVMNPFHQQRPLCGASIGAFNGKQHLPPVSYGGVVLVDDEPLGMSVHHLLDAPSDEESDTEDEAVSPYPYDAVLSSAASNNNPWLMGMGAQPGLELANDAPVPMWDLELSDDEDTGSEDDDEAESFDFSDSEFDSEDDSDQEAMTDSTMSRATVGDIEGIELGEGEEIKVTQPAIDDVDENFFPNEEDKDEDHLDSHELGHVHASSGIRRWKRDGILHEIDWALLKLNDERMQPYNVCQGGRRFAFGSMKPDQREISSKLEEPVNRRHYQPAEDEYPNGVASADSLAGLNVHCFGRTTGLQGGMVGHAMSSVRIYRRKSFSRSWHVAGGFGVGGDSGAWVVQNNSHRVVGHVLAWCQRNHIAYICPMEVLLEDIKRTLGAKRIYLPGSAEQMLFATKQQGQKTAGRESAIVKLESAVQGLGIVDSHDSAVDMRSAVGSRASTRRSRLDLSPLNTNGESDKENMHVLKGKAMRVNESRETMVQMAIMP
>Arab_Me14_ctg01_-_Arab_Me14_ctg01g424t1
MAPKRSLQCALLLSTTLGLAHAVSLPEPTAAPAKVEVRAPIVTPAAVRFDGKYSYVQKRDILEDIKNGVEGVAKSWGSVLGTDLPSFFTDGIPGWFENLPTGTDVMSSLGIGDDDLAVIPTQVLNVPPYANWTDQGWNVRLHGNVYKIPNISQSKIDDLANIFLIDTSVDKLPDDQKANARNLTRSIFIVQQGDENVTMTLEPAPMQGGDGEPGGGNAITAPGGNQTITLPYETTAEGDFDVFVPIKSNGLLNGNETENVQRLNVHTNGTDSGNATAFLVPPTGITFVSDIDDILRVTKIYDPKEGLLNSFARNFTQWMNMPDIYRNWSQSLPNNTHFHYLTTTPEQATRNYMDFIYKTYPGGSFDTRPLNFSDVKATLSIRMYLLQKVFQTFPQRKFVLIADTSNSDVMKDYPQLAHDYPNQVQCIFLRNTSSTDSSDWFPYNTAGFKGLNNRSYMFFHVPDDLSGLDIANGQCLNESIQQNVTFSRQDEVLGIHGGAGSKLAGSATISFVVALVAAMFLTL
>Arab_Me14_ctg01_-_Arab_Me14_ctg01g425t1
MSAPFVRPYDPARDFENGLHVFFSTIEPKLDWEPTRTIGSYLWYRVYVSLTPNTCFVLDDGSGRAAGYCIGTADTASFAQRWRDEFAPSVNSKSVPKPEIRTADPLMEREDTKGFRHALHHAECSALQTWPEELEKYPAHMHIDILPEFQRKGWGSVLVNTLFEAVKREGASGIHLGMVRWNTTGRSFYEKIGFQVCSLVLDNGESGETGVDGVALTMVKTL
>Arab_Me14_ctg01_-_Arab_Me14_ctg01g426t1
MQAAFSVRQRSAAQVRERLRRQHIRELDSGSLNKDRAKDRQKLSFHSNRYDKIKPQDPRSPGCVPALEAWLKDKFQDTKAGNAQRELAGASQAEMEKLREELVESEAQPIPMNVEVVAPITRILAAYQKGIADFLTKVNECLRPALAQIDPRRFWTEQLPQSLELIAKFMEQPGITAQAAVCLSHVTEAHRVDTFLITQHIMAMPEQPASFLDELQARLASTAIQRHYQLNSTNVPDCCPVAIYGREFASLNMAAFAAASMDLHPGWDCETNLTAPSFDLQRYVSIPVDFISRTPSSAPLQISAPSSPQVLGCSLCPLCEP
>Arab_Me14_ctg01_-_Arab_Me14_ctg01g427t1
MMPNCGRCVKRGKTEKCIYHPAPLTKPATKRSLNPDPGSFSMEGDDASHWLISGTKPASEAYLNHLERTNRSKSFTPLPRSVRSEGNYAVATSMRTQSHRPDSPLSPQILEEDPKPVLNQIVGTDALEFDKGAAFINHSAVLAENESIVGLSPPGWTGGSRILQSHIDRGVRVLVLLKDLSSIQKYIDKWFSFAGGVVIIEPMVKIYLEGLWSTWHKILESSKAADLQAMSAQIWENTSKPLSRLLKRDTTPREFCSSVTGPDLRWEVIGILASLVSLVAQSLKDGDPVFCSHDAAPVHRVSLAASMHNVSEECTNFCDTLGVLNDLYLWLLYENSVAYCSLRTRGSYDNWKKTSALAAALQCANLHQEITADEHTPFFIAELRKRLFICAYNNDKTSAVSAGRPPKLTRLYCRLQIPLDLTDAQTMSEGAELQATIAELDEEGWNQEGAVQRSTFARISATNALITEEILEISLGYLIPEEIVRRAADIEARVLKSWDDLPEFLRIDFSDPWNSHPLTARASVSCCHSTREFGSPISTTAHIEQEDYFRDFQIDFVQILAVHGIPAAAVLAMELLHQEQNPTSVLAQAFPLHRSDTIQSLSVFVSCLGTIRPDANGYQSCDRGRAFLKRILDLILGPGPALSRSGQAEAEQLADPTLGAPLFEPGDDGDFMRWLDDVTWDQETWINLTS
>Arab_Me14_ctg01_-_Arab_Me14_ctg01g428t1
MADPDPDAGKRRGLTCWLLDTRTLWPGSRIAESAKEALALISPEERELILRKYHVADAKMSLASALLKRLFVHKTLGIPWQSISFGRKRDPKHGKPCALLPPPLHGPAPIEFNVSHQAGLVVLVGCKTQDLDAELGVDVVCVNERNEGTMIESEGFEAWVDMYAEIFSHEETFDMKYNAPPFPLLDGTTVTPDMLGRHDRCCSKGQQLSITLPDGSERKFSSDLLIDAKLRRFYTFWCYKEAYIKLDGEALLATWIPQLEFKHVRAPNPGTPARRSTHGVWGERVSDAEVWFKHSRMGECRLEIQAFEENFMIGVAAKERRWGSEDAGLPDILTEFKGLHLEEDVMAIARKG
>Arab_Me14_ctg01_-_Arab_Me14_ctg01g429t1
MTVTIPDFTVGVLALQGAFSEHVQLLRQAAKELKQRKGANTKWEFIEVRTPHELARCEGLIIPGGESTTMSLVAARSGILEPLRGFVKVQRKPTWGTCAGLILLAESANRTKRGGQELIGGLDVRVNRNHFGRQQESFQAHLNLPFLGHTADKSADQPYRCVFIRAPVVEKILPHANGVQATEEERDETVVAPSKTPVDELAKEQLTKEVEVMATLSMKAPALQQNQEHDHAGKEDIIAVRQGNVFGCSFHPELTDDPRIHVWWLEEVLKAAERRQTFELADRAK
>Arab_Me14_ctg01_-_Arab_Me14_ctg01g430t1
MPAIRSTIDRLDKPSSYATAKKRRRNRDDDERGPTPEPEDKLKDATTLYVGNLSFYTTEEQIHELFSKCGEIKRLVMGLDRFQKTPCGFCFVEYYTHQDALDCMKYIGGTKLDERVIRTDLDEGFAEGRQYGRGKSGGQVRDEYRNEYDPGRGGYGRVYADEYDER
>Arab_Me14_ctg01_-_Arab_Me14_ctg01g431t1
MPKVLSYTPEWLSRPSPGYHLFAPKQSNGNGAAARSKDLGPRKTIATRGSEIFVAVGHEIRWADLVNLKEGASPAYRSLRVSIPLPITRLTISPAGDYLAVSTSHTVHVVSLPDPSLLESGSDDSPIKPKTFQVGPTAHVLEESPIATTLWHPLGYHGRCLVTITKAGVVRLWEVNRADRSTFSEPTLSIDLVKLANAQRDQDDLGASKYGASKGFSPDSVELEVASACFGDFPEQEGVHGWAPMTLWIATVFGDVYALCPVLPSRWQLVETPGAFTFLQTLSSSININYTELSEDNDAPKEDVKTSEKQVSWLSDILYEEPFTEALPNGDSVKVFNRPSSTPAVPLLQGPFMVAPQVEDFELSDMIVYSLKTFSDGSEEEAAEGLPAAVVCLLTDSCKVHVCIDLEGIVGRWLPSAEDDFEITQIEHDLIIAETITLKGDSASTFNQTITPDVHTDFSFFVSTASGVTYISMEPWIRKLEIELSEPHAEGADFRLQRLLGSASSRVEQYLERRPSGNSVEQDVTSAVIVEDGNVGYMILTTVNDEPQAALFDAPEDGMATEEELAEYIEATVPRKEVREAWQPPKELYEPFDLLSSINIPARHKASLRDEVRLSPANLELLMDVHRVLSTQTEKLQKAVADLFNRATRLQDEFRDQVFRTAEVVPKIDAVIGNDEEPSEEGSMYGTAQIDDRLLQVRKRQDTINARYESLRRKMNSIGSTELSEKEAGYVEELQTMESAVDKSNRTLTDDVDGSEVPAWQRLNKLKELHKTLAKQVEETSQESQAEQAHASSVKVPSYSRRQENEYIQELLQRNTALVEAATTRLRSLGISVPTETGH
>Arab_Me14_ctg01_-_Arab_Me14_ctg01g432t1
MFRFTELVYLIASWSSLAAAHTVIVYPGWRGNNIHTNGTASPTDPNIIPGSLGINYDNGTLGFPYGMQWMYPCGGMPTSQNRTKWPLKGGAISIQPGWFPGHANAQFYINMGYGNEPLNYSHNMLPVFQITGPSNLQYDGTFCLPQVPLPANFTPQVGDNATIQVIETAQHGAALYNCADITFAEPEDVPEVNASNCFNSTQPGQEIGFQVVYATTSSPAPHTLVVNGYASIAVPLMLAAASYLTWT
>Arab_Me14_ctg01_-_Arab_Me14_ctg01g433t1
MATDAGPLDAAPLAQAHDLAHEADHEAFHDTQSTTSNMADRDEADTCRICRGEGTDDEPLFYPCKCSGSIKYVHQECLMEWLSHTQKKHCELCKTSFRFTKLYHPGMPSRIPTAVFLRRAALHVLHMFLTWCRGILVASVWLVLLPWCMRVVWRSLFWVGDGGWAGDMYTELPEATNRLQPIMSDPAHLETIHSTLDAARAANTTQNLTLSKLLMPISTTAQHQNAIANEPILWTFAKRLLLGWPHSAITFVPASLNSTDYNSTSDSLGFRSPSLLSDISWFRWFKSQTANRFLVDVFEGQIITMLVVVAFILIFLIREWVVQQQPVINMVALGGDGAPRVDRVAVQVQEEQAENVREQADNVAQHGEGTGRDEPVIARTEPELDANTAARAVELGAGRHNDFLRRQRERADELVLQNTDLPQWLRDALQSETTQEGKESVIRSLSEEQANMIGMIHDQSLIDAYASLVAEEEGSGSNAAAFPTRFSSLPEQQAVISENIEADASGSLLRPGMPARDRSFIATEIRRGLEEGNSWSFDNVLTSSENASRDAVPENWDDEGAEEESGNQLDVPQSENDPSSEGSSGSWQQVSDINMEDDSDQALEGRSSQNKGKGRVVNDLPQSDEDESAARAPAESSSNAEGIRGETAMDVEIAAESSTGQPEAEEQNAPLPDEASAAAASVGGAPAEALEASFLDLILDWIYGPADPATRPVDETANDEHVVRNLDEEAPFVPFAGNEPLEPANAAIQDPEVAAAAAQAGLDVNDQEAIEDAEDLEGILELIGMQGPLVGLFQNALFSAVLISATLACAVWLPYLWGKVVILFIGSPVSLFIKLPLQIIATVTDLVVDFTLVVAAGFTYWVSRSISTVIKLSTKGEGSEYVENVLRSLSVPAQSVAKNAALRITKVVIDSSLSPHPGYFRLSINSHAALRSLQNSTSSVLNQTSHVFGSVLEEAQADSSFALLWKGLGRAGSSVGGLIQKSSELLAQMWTSKSYKITLDMDLGSTEDVASALEHWTAKDRLIAVTAGYTFFALAGAVYLRRATPLSSSQQGQKIERIIADILQQAGGVLKVILIISIEMLAFPLYCGLLLDLAMLPLFKNATLYSRWQFACGSPWTAGFVHWFIGTCYMFHFALFVSMCRKIMRKGVLYFIRDPDDPTFHPVRDVLERSVATQLRKIAFSALVYGALVIVCLGGVVWTLSRVTYGVLPIHWTTEAPSLEFPLDLLFYNFLTPVIIKAYKPGESLHTVCTWWFKKCASALRLSHFLFNERNEEEEGHHIRSTWFGWLIGRKGDINTPQNEEEKTYEDGTADAYFVPDGRYVRAPASDQCRVPKGQAVFVDVDKDNVRKDGNTDGGVHNSELVQMVYIPPWFRLRIACFVVTIWIFMGVSGISVTIIPLMFGRYLFSLFLPPTVEMNDIHAFSLGVYTLGSVVYSGYQLYKLASSLNRPNVSPLATLRSVAATTSRVGLTVLRFSYVWASLIFAVPFLCAVLIELYFLMPLHAWMGPSEPHVVHLIQDWTLGFLYSRLAARMIFANRNSRPAQAFTQVVQRGYLYPDAKLATRCFVLPVLALFAVAVAAPALLALGANFTVYRGASEATRNLVWRHSFPAVGLSIGVALVGRVLARIVTRWRLVVRDEVYLIGERLHNFGEKKAPQARQEAGTQTSTTQSTAVHAA
>Arab_Me14_ctg01_-_Arab_Me14_ctg01g434t1
MAAPQSNGRAKKVSKPKASGYLNGSANGHLNGHADKSKSSSVAVRPRKQRRTFTGAVTSILLRLSVWYVILTAAFRCPSSVTQLNDSSPRVCTPYLQVRSYVTPHLDPYYQAYLAPHVEKAKPYVDRFERQVYTPAASFTKKQYTTYGAHRVEQARKQAEAGWDKTVRPHLQNAQNAAQAQYDVYLGHHVKRASDAASPYYDQIKTGSSSAYHKSLLPAYEASRPYLRKARVQGRHVIVDVVFPHVRSAKDITWAFLVRNIWPQLRVLYGDNVEPQLVRISERLGRYRDQQRVESVVDAVESETSTAATDATKIVPTVAASSSSSIASVASASISSASKAASSVVDSILGGDSSSAASGEAQSEASIDPKDSGLSPEELKEKLNEDLRKWQTKFAAAADKGAEDLEQRVAEITTRQVEKGVNGHGKALIVKLEESADSTIVSLKSFIKKTVKSIPEDATEKDLELAHEQCSTKARELGQTVKQKAQDVREWKSSYDTETDTLVQAAVKSTVEVLEKIHGLGLQEVGMRWAWTDGVTYKDWQNYHKLKSTLTEWQAEVESVGSRHEGLRLAHEEAKRLEDEAMSIASKNVNELVRLKDVAKWKLWADDATDDFTNNAVPPRARKAAQQVLDNVGSASSKVSEAIVGSETPVSESIASSIKSAAFDASSKMSEASSEVYKSVVGAETPSAQNVLSQASSKASEVVVDGASSVSSGASEAASSASSAASGAKDAVVEKASTATESPKKVWGGVAAQVLVEAREPVFDDVIDDDESVNYSVKLQSMVADAGDRASELSRAVSEALLGATKTQGSVESATSLASEQYAKAIAAASSALYGTQQQPLESATSIASVKFADAVTAASYAIYGTPTPTAVIKTVQVEVSSRYSNAVSLASEQLENAKSQLSVLASGTQQPAYQTLLSGFEKAYSDSVAAASSQLHAALQYTESAKSYAAGPTQGYFASVSSIASSRLSEGLSQASAQFSTQPTSGIDSARRQYYEAIGLAHGRYSEFLGAASSAVYGPQQGTAESFASVASASASSIASAASVSAASAASGVSDTVNSAAANAQSVASNAQAAAESLASQVSSGVIGSETPWTESVASQASENWEALIARASSQVYGQPTPWTESVYSQAGAYGAQATARVAEQYAGIQALISELVVGKEPDFTESVMNRFASAYSTGLPAVVASAESYVNGQYDSASSYAGESFEAATDYAADAYASASSVVSSIFTPPAAVETILSQASAQIDSALESASVAVYGTPKGAAEQASESVASAYASIQSQVSEAIYGTEQAQDSFTAAAVSAQAAISAAIFGTPTATGYAASITSGASDTYGSVASGAGEVYSSVASNAGEVLDSVASGAGEAYTSVASVASENADYAYSKISSAIYGPEQGAMESANSRIALAVEAANSRISEMYASASVNAGKAASSASSVATEATQRVKDEL
>Arab_Me14_ctg01_-_Arab_Me14_ctg01g435t1
MAPHPELDANTQAQARSPLAVRALHLAKSLTKRDDYKVIAAAGSRPAQDLSGPGFQVLFALIAVGMTLTAIWFFFWAKNGGFKWRKDDWEDYKSTVLRRKGPDGKTLSNATKSTRLGGGSVVHGGSYGAESSVGYTDETGTSADMSEIRDAEEGKSRHGLRGGDGRRHKKHRRDHTNDYNDPDLDGYRHEKAARVGGLNRQADGMYTDYSPTEPSDLGSNVSGKPLVKKDKRDPKKEAKEKERRARERMKNARAAEKEALKTAAAQAKARKEAEKAEAKREKADQKKAKKTRSEVGSEMPEMAEARTEYTRAFTEYTAPSEYDHSEARDFAPAPPKSPVKASSPVKSPPPVKASAPAKAPSNARRAPPSAAYSFTTGDDDANTVYTGAYTEDSRTNARSAPSEAAESSYYSDYRPKAERAQARQQSRDRTSQSRPRPAESRSRPTSQSPQKKHRSSRPENSYAPSDIFTTANGNAQGHMSYPCHIPGLSQAGTVVPNESVSQVGAPSHRRERERGGRDVMAGYRRGGERGRRDSLSDSDS
>Arab_Me14_ctg01_-_Arab_Me14_ctg01g436t1
MSTTMATVIEAVQLQTISKANFQEPSVRTPRPSADSVRTLGAGRTGGIFESEFSSLSASKTPNLHIFLAIFTPSFVGFLSSFTNGVITIGLPEIARSLSLDRSLYLWPSSVYGLTSGACLLIAGSIADIVGARPVELLGITLIGAFTLACGFSTTGEQLVVFRALQGVALAMHLPASVALISGAVPSGRARNLGFACLGFSQPLGFAVGLVISGILIEKAGWRSGFYLSGGALLATAIAAVWSLPKLKTGAHDGVITLAKKVGKEVDWVGGMISGGGLAILAYVLAILSADLATIRSAETATLLALSIVLLLAFPAWMYYRERVNKPALVPNKLWRNIPFTSTCIMVALSYGVMNSIETFSSLYFQEIQQATPLTTSLYLLPNLATGVLLNVLVGTFVHKIPALYLVSISAVICSISPLLMAVMDPSWNYFYLAFWAQVCAPFSADVLFTVGLIIVSDNFLERDQALAGAVFNMVAQFGMSLGMGSCQVVALGVIGSDKSSNDGGSGHGDSSTHDPRELLKGYRASFWTMFGYMLCCVCIAIVGLRKAGKVGLKKD
>Arab_Me14_ctg01_-_Arab_Me14_ctg01g437t1
MAGTRSSTRNGSNNSSPTKNDAVVGSKRKPEADHDAETSPKRGRKASKNQPTIDSMLDPKPEDQKTKDDTEMQEAAQDVVKDAEKDTPEEKLTEQTAKGKDKDATKKESTGTANGAETKATDGQDAVSKTDGSTNNKAEDATNTEVNGDGAIEESSQREKKMPSNILEKGVIYFFTRNRVSVDEAESVGDLQRTFFVLRPLLTGAKLGDGAVQDLKNNRLFALPKKVFPKSHNDRFMAFVEKANTSIQDLKDNFFKGADYDTQTQGTRHTDPVTPVAEGVYLITRTEDATTHLVYSTTIPSDIGEVQEDLGIKDQGSFIISVKSPERSGPASASLPQKPDFSKEIIEEFRGLAWTEVKPKYLDHEYCQILLIGENMDKAVEPTKKNEKHDKETPKEEIERLEHEDELRVQHLKGDDSVFEDLKISKDEYPKVPTTW
>Arab_Me14_ctg01_-_Arab_Me14_ctg01g438t1
MAEHSRGKTPILLLKTKSAPTDTYEELFSTCDNSRFAPVFVPVLEHRFKRDALATVRQHIVNRGFVPTSQNGLATYGALIFTSQRAVEAFHEVVEDIRKEGSFVVDELLPESLPLYVVGPATARGLRALNLRCPILGEETGNGEALAGFILDHYNALYPGVLNPPILFMVGDKRRDIIPKTLQSEALAVDRRAKVDELVIYETGELRSFKTDFTTVWRGNVDSGSKRQWVVVFSPTGCQAMLESLGLLDVETGKAKKVEGSRDTLIVTIGPTTRDYLINEFAFTPDVVAEKPSPEGIAEGIRAFSKLSS
>Arab_Me14_ctg01_-_Arab_Me14_ctg01g439t1
MAELATPSAAQVATADATAPQEKQQTVRPEKPDEDQFKEDLAKAEKEHQAAQDKLNAAKAKLDTARPNNKDSPNAKRQQELKTELNAIRQAQQGNKTGRNAIFEKMKKLDEQLKSRQNELKTNKSRVNFRSAEDVDQEIARLQKQVDSGMMKLVDEKKALSEISSLHKARKNFSGFDSQQKGIDEIKAQIAEQKKLLDDPEQKALSEKYTKLQTELDGLKAEQDEAFKSLKALREQTDKARAEQQEKYLARKELKDKFYQQKRAFQEYDFQARKARNERRKQEQVQYLAGKRKQAAEQRLEEASAPAYQDEIFATEGLIRHFDPSALPAKETASTSKFAASAQRTVDDSAIKGTRISKKDTEEESYFMGTGGKKGKKGKKGGAAPAAAKFNLNIGIIEELAKVGVDAPSSQADVPATVEKLNEKLAHWKKDQDRKTKENIEKAKKEIARLEAEEDAANGTTDAARKPAQKNEAVNGSASPSAELAQEKDAAADVTEDLKQASIEDKEATEA
>Arab_Me14_ctg01_-_Arab_Me14_ctg01g440t1
MASFSNTDTGSKPADPYTQKNKDEVSLKEKVEDLFTFIDKTKFCLFTTHAGDTDLLASRAMALAAKEGNGFDLLFHTNTESGKTDDIKEDSSVNIGFINPSGEWASISGHASVETNREVVRKHYSPALKAWIGDLGDGKHDGGPEDPRIAVIRVKAKTAQYAISSRTSIGGFVELAKGIATGEAPSVNKLRHLDASEIAQWKSQ
>Arab_Me14_ctg01_-_Arab_Me14_ctg01g441t1
MENPVKEIAGVIHLLTQSPPSTQRQTIETYFTPNASFTHPFCRTGKWPNSRWLIAAIYRWYKIMSPSIDITVQSVAFDESNSILYVSIFQIFRIWLIPFYYAPVFLTSVIKLEYNDDDEKYYIKSQDDLYAVDQWIRFIAPGGWILVHLWQFWATFFCVIGATVLHPITLLEERSNQEGSEVEWQRKRKQFGQLDGMRAEELLQRTELKGK
>Arab_Me14_ctg01_-_Arab_Me14_ctg01g442t1
MSLKYLTLALAATACAAPGSPFQALEAQASSDNPCEPCQPSGATGSDPPAVGSDLSSLYVNVLNSVQGISFSKRGLTARAATSGFCCVASLNCVNVQSLNIPMCYDKFTTNFKFPDGSYGSLTTGDYHSNGQDINLLSGNYSGGNIYSAAPQDKPNTSALSVPAQYTGTGVGAAIPASELGSVIVYTTTVPGTTFTAPTTVPGTIRAATVNGVEVSTSIAPQTITQATTVAPQTTVVTTQVPDATAAASSKGAAGAVGVDSSKSFGVSVLGALMYFLM
>Arab_Me14_ctg01_-_Arab_Me14_ctg01g443t1
MDADGRKVCWSTQLIPQIIINYRRHNAVGLQPTMMMLWAWAGVPLGVYNIVEEFNIALRIQPQILTLLSLLTWIQCYYYEKSWSVLRSLALVIPVACLMGGVQAALIIALRHAKERDLEWPLILMAVLAATLLAAGVGRHYVDIYLHRTVRGISFIFVGLDALGDVFSLLSVIFHSKLDILGMVIYATELVLWTGIFACGAYYNLVPWVKEKRNRGSSSSAANSGPQTGERATGTANTTGITLHDMPSSTSVFRTTSAEIEMHRQRSVSSRISGVAHLPSRPAPSVDCYCCFFVTWQAHRPQFMLTSTPRKSFPTIAQALPSLVFPSSSTSIVGEPFSPRAPTTKDSFYSMATNSVTPTKVTSLGSQYSVSASDDVTVPNPTPRTEALDDEVVDPPPEIDFVAMSKTLATIAETLNESADEAMFPTPPINTPVITSPATSVVHRHSFARSRGMSTIGDRLARVVAEDRKLAHRDSETISGSSRSIRSSVPATDESDGGFSVLLGGGGKEKQEIPIALGSPRINPLGLISFTSNDLADRAPVPFNSTEPIEDASATGIGSGSHHPNSQISLVSADTGVTEMSNWKEEVEGYFERAVQRLENLAHDEHQQDPSRPMEYYYEAHLKRLLGIGSRRIPVSVNLVIDSQQQ
>Arab_Me14_ctg01_-_Arab_Me14_ctg01g444t1
MASRPSEAPEKQDTEKLLPGGRKIVNGIVYDADGKPCRNCNDMSALFAMGKKTKKLAAPPALPSNCPPDVAQLGRSSWTLLHSITATYPENPPPTLQSETSAFLRTFGKLYPCWVCAEDFQDWMKLNTPRVSSRSEFGQWMCEAHNAVNVKLGKKEFDCNKWEERWRTGWKDGRCDP
>Arab_Me14_ctg01_-_Arab_Me14_ctg01g445t1
MPPAGSGSSRKISFNVSEQYDIQDVVGEGAYGVVCSALHKPSGQKVAIKKITPFDHSMFCLRTLREMKLLRYFNHENIISILDIQKPRNYETFTEVYLIQELMETDMHRVIRTQELSDDHCQYFIYQTLRALKAMHSANVLHRDLKPSNLLLNANCDLKVCDFGLARSAASTEDNSGFMTEYVATRWYRAPEIMLTFKEYTKAIDVWSVGCILAEMLSGKPLFPGKDYHHQLTLILDVLGTPTMEDYYGIKSRRAREYIRSLPFKKKIPWKAMFPKTNDLALDLLERLLAFNPVKRITVEEALKHPYLEPYHDPDDEPTADPIPEEFFDFDKNKDNLTKEQLKLLIYQEIMR
>Arab_Me14_ctg01_-_Arab_Me14_ctg01g446t1
MMPASIIEGHESVSWPLESFTVGRDINSSNPTRIFVDHATHEFGIVYYYANSVAAVEQFSDTGEPVYFQAKTALMACWHSRCKKISVLFQHLQVDLKFCSTQEARDFLDAFKDAATITQNNVFYAYEHNSIKTFSSASFDMMKDERASRIAQHRMDAPAPSSEWPSLRKSGEWSDFTIMAGGKSFPVHRVRLCKDSSYFTAVCNRGFAESNDRSIQLPESERTIDTLLDEMYDTYNSTTGSLFTGFALRSEMEKERVLNDLLDLFVASDKYNFERIKTKVARAIIDRMPFVHDSLTIVDSSNYIFDDGCPQVDCGLRKAVVAQIQCRLPAIINDKAAWQEYSNNKALLKAFHIQLAHLDATAWSEDSPTLLSPPPTPTGGKRKRTL
>Arab_Me14_ctg01_-_Arab_Me14_ctg01g447t1
MRSFAVLAMAASASAYAYNPTYNVSSSAVESYAASTPAYAASTPVYAASTPGYAASSAPAYPVASSSTKYEEYPVTSTKVIQETTFVCPEPTVVTYEEKTYSVTKATTLTVSSYTTTVVKTTHTPEAQKPSSKVETPVYSASIPSVAPTHAPYPSSNATVPTAPQGTATGYPTGTKPATPEFTGAAAQAGVGLLAVVGALAAFFSSLPSFESW
>Arab_Me14_ctg01_-_Arab_Me14_ctg01g448t1
MQARTPQEWPEGTTYLRAPSYSKKLTKDKLNLLLLSKADLSSTERVLTTRSPYANVKIKPISNVSHPAHGQHGLYAAQHLPPDSFILPYLGFVHDQTETDETSDYDLSLDREIGISVDASKMGNEARFMNDYRGISTGPNAEFRDVLVDVGFGLVEKRMGVFVFSAGKSGKRAKGIGPGEEILVNYGKGFWTGRQPAPG
>Arab_Me14_ctg01_-_Arab_Me14_ctg01g449t1
MAPSTRPTLNRNESMQKYILLAAQKEAVQRRISMSIPFGLPMSTSSPEFQSLSSSPVSPTDSTSTYPTATEPVPTRSSTAAQMSVDDLNTDESHKLYEINQQIVATLMELLNTDAVKTDPQYRAFIQEKLMESEHHIRQQRRRHSSNAERDHASSIAHHLELGLNASKTWT
>Arab_Me14_ctg01_-_Arab_Me14_ctg01g450t1
MSSDKDSASESTAYINASVYTVNVSSPWASGFIVSNDGFFTHVGSTEEILSEAKRSHLVVVDLRGRFTMPGIHDAHMHLLFSGLGLTSHATIDMDTTHLNIAEKIKHGNCACEYMNAYQDWVLASAYNNQGFPDGVADRKYLDRLFPDQPVVVSGGAAHAMLLNTAALVQAGYDIENEPDTHGAKFFRRADGSLTGELAESAMAKAAISIPAPSRAHVKRALKHAIRLAHKAGVTSTQEASSNTILLQALSEMEREGSLALEISTHIVHENEWLASESKKGLQQLLEVANQYASKHIDTRFVKIMMDGVPLPPLFTQAGMTEQGDIDHSMIVPQDAVEAVLKYDKKGLTVKIHCTGTGATRHALDAIEAARRINFNGPRHEIAHNSGVHDDDFKRYAPLNVTAEMSPAELFVHPVTAASEGLMNWNFTRMMDAGAHITIGSDWGAVPDPSLFQHMANIVTTVGRGDKAVGGEALCLMMTLNGAIAVGRERELGSIEVGKKANFIVMNQDLSKGNFDGAKVLRTYFEGEKVWDANA
>Arab_Me14_ctg01_-_Arab_Me14_ctg01g451t1
MEITGFTENQLMVREAISQVCAKFPNTYWQEHDQDGTDPKDFHAALAADGWLGVALPEAYGGAGLGISEATIMMQTIAESGAGMAGAQAIHANVYATQPLAKFGTKEQLEGTIPKIISGEWRTCFGVTEPNAGLNTLSLATAAKKQDDDTYSITGQKIWITCAQVASKMILLARTKAAEEAPKPSQALSLFCIDVDKSNPGIDIKKIKKMGGRAVDANEVFFDNYRVPASTLVGKEGQGFKIILDGMNAERCLLAGEALGLGYAALARAAGYARERKVFNRPIGMNQGVAHPLADAYMNLEAAKLATYHAARLYDASITDSSIRQDAVGIAANSAKYLAAEAAFKACERAILAHGGMGYAAEYDVERWFRECMVPRIAPVSREMILNYVSEKVLELPRSY
>Arab_Me14_ctg01_-_Arab_Me14_ctg01g452t1
MKFTSALVVPLIPALSSAAALGRRQNQQGDGPQGGADATQGDLSGRPLPRFPFPRVEFPVPTETVVLNQTMYIYPGQIFDGQMKRYERVEGSCNEQAEGTDADAVFNLMSGATIRNVIIGQHQSEGIHALGDAWVENVWWEDVCEDALTSKGLNTQLRVIGGGARNAQDKIFQDNSLGGKFNITGFYAETFGTFYQSCGNCLNQAKRNVTIQNVIAINGTRMGIINPNFGDEYRIKNSQVQDVKFMVDKEIGNNVQTVPYTVGTGPDEKYALYNMTRDHITGFNGTATNVYEPEQPYEWLSEFWPEK
>Arab_Me14_ctg01_-_Arab_Me14_ctg01g453t1
MSANQSPVAQAHLRIVRPTRSISALLPIYTTGLGFQIIGSFEKHAGFNGAMLGHSSLPYHLEFTEEEGHDPGRAPTKENLLVFYLPDIEDWMRAVKKMEKAGFESAESYNPYWDAEGQGKTFEDADGYRVVLWHGGWSPF
>Arab_Me14_ctg01_-_Arab_Me14_ctg01g454t1
MLELACFTASSALTAARAGASRIELCASYTSGGVTPLLSTLHSIRDELQRSSPSTATIPGAPTAEHGQIPIYIMIRPRGGDFSYTPTEFEAMKSSIDGFQAIGDGAVQGFVFGILTADARVDGPRCRELVELAAPLPCTFHRAVDGVADEDLEGAVQTIVECGFESVLTSGGAGSAREGVERVAGLQKKYGERITLILGGGVRSSNVVGLKREAGVRWVHSAAITGPGEEVDEAEARRMVALLQHV
>Arab_Me14_ctg01_-_Arab_Me14_ctg01g455t1
MPPFTSRCPCTNCTTSWPVRKMCPNHIIATNVASCKYLLQRADPTTLDIRSNFALLERAVAQFDSRFALRALRSISSLRKRLTDRVLCSVIILTYSPNNATARTFIEYIGMDGEAIQSVVSQYKEEVQANKTSAKEPLPEIDVYIAILIQVYLYDQKEHDEGAEFSEKLVDKIRDMNRRTLDSLGAKAYFYFSLFHEELDPKPPSKQSPVINIRGKLLAAMRSAVLRKDPDTQASVTTLLLRNYISTADITQADLLVAQTQFPPNAPNNQVARYLYYLGRIRAIQLSYTEAHEHLTSATRKSPSGNVATGFYQASMKLLIVVELLMGDIPDREVFSQPRMERALQPYFRLVQAVRVGDLQGFLKVVQTHSATFHKDQTYTLILRLRQNVIKTGIRMLSLSYSRISLRDICIRLGLESEESAEYIVAKAIRDGVIEASIDHEKGFMQTKQAGDIYATREPGEAFHDRIRACLTLHDECVKAMRYPMNQHRLELKNAQEARERERELASEIQEGDIDDDDAGGDFDGFEWRRRSAAPPHQLASLRNHHTNTHLTTAHASPPGVPSCSAVTDMIDVPRRLRRAILLNDLPLVQRIIRNNADYLRNPDYQEKSNTNLHLAAKHGFTQIAEFLIDAGHEDDSVSRNNDFETPLMFAAMAGKEETGVMLAKRFPECIPWVNKAGLDALMLSSKSGSGTLHLIPTLIVQDPSILTAHDNAGNTALHHASAAGELKTLRLLLQYGANPFVLNAYSWTPVHYSATPAAEAYFKTLIIDFEKKKAESKRELQERQRQRTAGVRLVTDGDGLVGRGSSESERVRVRARDDAGLQGLPAPGMDWSPVEKRRAMTPTEGRGWTFTPDGMRPRAETGESSGTV
>Arab_Me14_ctg01_-_Arab_Me14_ctg01g456t1
MSPVAHHPPPGVTAVTTVTTVTTVTVVTAVTTGITVITVTAVTAVTTLPFHAPPSPPPIAHDTQHGSTATMADSMEGVVTAAEKPTAEQTEQQAIAGEYLEM
>Arab_Me14_ctg01_-_Arab_Me14_ctg01g457t1
MHVMTLLDNHLEQISLCSASIAELHFAPPKIFTNALLQNHDITTLIRDTEAHERALFSVPPPPAAPTHAEPPTSTNRRNTIFNPSGGPGATTSGGGANAVRAPRRNTAVAAVLGNELVERIRRGGGGGAGSGLGYRKYDATNKNDVDVDSLLEGAEKLLGVYRVPGAHEKIAAMRQRHARLESSLEYYESRLAEQTARLGRLKKSRGDYADEDAELDDEPQEDVVLTAEDLRREEEEVKQLESKKRGLEDRVHSMGRDISGLR
>Arab_Me14_ctg01_-_Arab_Me14_ctg01g458t1
MSATKVALITASSAGLGAQIARVFAPDFRVVINYSSNSERAQSLLKELNAIPSTASSSEPRFHLIQADMSSKPSVENLVKEALDKFGRLDVVVSNAGWTRMTTFTDIEQQVNEEDWDKCFVMNVKTHLWLAYAAKNALAETEGTFISTASVAGVKPSGSSVPYAVTKAAQIHLMKSLAVILAPKIRCNSISPGMLLTEWGLKFPETKRNAAINNTKLKRLATVEDCADQVRVLALSRSITGQNISIDGGSSL
>Arab_Me14_ctg01_-_Arab_Me14_ctg01g459t1
MEVFSSFYAFADRFKRPIYIAQAVLVLGAFITGCTLVANTSMPRSPFTTLVLVYAIKSALFLLYQYLSTHMARFRRFASLKANYILYQLDCLLWFTAFFISCMGGGRCGGSSCTLIAVATTIALLLCGTYLFTAIGINWPKWRASMKLPQVEQV
>Arab_Me14_ctg01_-_Arab_Me14_ctg01g460t1
MEKMGTATESSRPPKEGEEEVAATESGSISPGIVKKLDEKIIKHSHDADAAMKAFEGMDGQVFELTPEKNKALLRKIDWHLMPIMCIIYGLNYLDKTTLSYASVMGLRLPPSDNKLASGINLKSDEYQWLGSLFYFGYIAWEYPTTRLLQRLPLGKYSAFNVIMWGLVLSCFAAVENYAGAIAIRFFLGVFESAVTPGFALFTSQWYTKREQGSRTAIWFSFNGWAQIFGGCVAYGIAVGCRKTGTAIEPWKIIFLVTGLLTTCVGFVFLWIMPDNQLNCRWLSKEDQILAIERVRINQQGIGNKHFKLYQLKEALLDPLSWAFFFYALIADIPNGGISNFFSQLIVGFGYTPEQSLLYGTPGGAVEVVFLLACGWAGDRYGYRILISMIGLCTAMIGMILIVALPLSNNSGRLAGYYLTQASPTSFVALLSLISSNVAGYTKKTTVAAMYLVGYCVGNIIGPQTFRPSDAPRYVPAEVTIIACWGVCLGILAFIHFYCVWQNKKKAQICSAPGYVRLENQEWLDLTDRENPEFAYTL
>Arab_Me14_ctg01_-_Arab_Me14_ctg01g461t1
METYHGHVRTPNDAIILFEACRIGILPRVQRRLSEKERQQIKSGSVFVWDEREAGMRRWTDGKSWSASRVSGSFLTYREMEGKRGGAAPTPPLVKRASGKSPDGSATGDSDGEGPDGYRYKPDGLMKQSFSITTSGGQHLHLISYYSRSNSNNLPQPTNDAQLRHIRPPKNMYPESTVNETQAAPAVTRGPMPGSPHAAAAYSMGPASPYPRPGPVAPMYAIPMYPPTPPNGTPNIHPYHYAQHPGFFYPPGVIYTQPGYHMPPHPQGHVLDRPPQPIGHLHAPPGHPMYAHHPVYAAHAAQAGQYMATPPARAPSSAELAQHQPPPPPTPASSIPEQGPQLPAINGAAASVGIAKPPTPEGDRSPSHIGAESTTAATSRPLPTLTSLLNTSGTDKDNQTSSRSGSRSPNTAPRFPRDLAPERLAKNSTAADSSALNKLNSVFVRS
>Arab_Me14_ctg01_-_Arab_Me14_ctg01g462t1
MLTIMPHNEVQKTTWQNASRAGQQKQEELVRQDFADAGWQAERLLNAMSKAPDFYFQAIQQIKMTEWSNNRVVCLGDTAYAPTPLKGMGTSLALLGGYLLAGELAQLEHAEHPGKALEAYEKAFRPFVEKTQQIPNVVPGIAHPDTAWKRWLLETAISTMVRAVNSPLFVKLIGGAKTAEENDDGFQLPQYESLDRVL
>Arab_Me14_ctg01_-_Arab_Me14_ctg01g463t1
MSLVSDATWAASPTTTRGQPTPLSSDPKGERIAYASGKSIFLRSIDDPSVSKQYTQHTAQTTVARFSPSGFYVASGDVSGAVKVWDCAGEGATKGDYHIIAGRINDIAWDGDSQRIIAVGDGKERYGHCITADSGNSVGEISGHSQQINSVSIRQQRPLRAVTGSDDSSLVFYHGAPFKFNTSLREQHNRFVFGTAFSPDGSVFASVGADKRIWLYDGKTGEAKGQIGEGVHTGSIFGISWAKDSNKFVTASADQTVRIWDPEVGKAIQTWRLGEEGVVSIPDQQVGVVWPTGRSDGLIVSVDLEGNLNYLVDGNPKPTKVVRGHQKNITSAGISGSTFATGSYDGRVLAWDVSTGLADKVGGASHSNYVAGITAADSKGQAELYTVGWDDSLRSISVPDKIFTGEASELGFQPKGIAATGDVVLVSSAESIAVYSKGSKASSLSVKYAPTSIAAYGSIVAVGGDDKLVHIYTLSGIELKETGTELRRATAAISAVAFSASGSKLAFGASNGKIYAYEAGGEWKIITDRWSAHTARITCLAWDDSENYAASGSLDTNVMVWSVEDPGKRIKALNAHKDGVTGVAWQKASKVLSAGGDASIKVWTVKT
>Arab_Me14_ctg01_-_Arab_Me14_ctg01g464t1
MGDPYNSGHDQGYLHATGDGNLSNMINSNGYDPFQQQALINRNTHSSTTYSYHDSTNYQLSPQAAQYSPRQHQAKTHPCDAQLTPHTRGTLPYQSETMSRDPSHTSYRSSMSSGQQYGSPHFEQRNSAPGIWSSNRLDMQRSRSMYSDASTLHSQPINPHLDAPEAYQQYVDSYDPEPIYALATNFLTTTRRHSPNMHLDESVIDFFSNTTDVNLSDFGMGDIGRNAGQSSYLTTLTPHIRPRAKSDGHSTQRPRPCTLLSALEDKTAADPSDSVTLQPPLPAQQPKHRVRARTPPSDSESEVITGHVLASGRFKCSDPKCDNLRFGRQADFRRHHINVHALKKKEYFCTVEGCDRSRRPSRKSKGRSFGARKDKMKEHVQTVHFKESKKRKRSSGTAADDQDESDEDSGPESKTSL
>Arab_Me14_ctg01_-_Arab_Me14_ctg01g465t1
MFNFTPLLGAQSASPASQSLLEFDGGVKVLIDVGWDDSFDVDKLKEIERHVPTLSFILLTHATTAHLGAYVHCCKNIPAFTRIPVYATIPVISLGRTLLQDLYASTPLAASIISIESLSESAYAYPSAFPGGGNPNILLQAPTHDEIANYFGLVNPLKYSQPRQPLASPNSPPLNGLTITAYSAGHTLGGTIWHIQHGMESVVYAVDWNQAREHVLSGAAWLGGPGTGGSEVLEQLRRPTALICSSKGSGKHTNIKGNQRDEALLSMIRDTVAKGGSVLIPSDSSARILELSYLLEETWQNEASRADSTSPLKNAKLYLASRTGGATMRYVRSMVEWMDEGIVKEFGAGGAADGQEQSKGRTGGGKDDRGARPPFDFRHITLLERKTRVTRMLGDAEPRVILASDSSLEWGFSKDAIKSLASDEKNLVVLTERVGELNGKEKGLGRYLWETWNEQNAHIEQGSSTTIVESPGPTSIRAPRAVALEGDEVPLYQQHLARQRQLHNTMGGDATTNMETADVVDDRSSTTSESSEDSEDMVHPHQGKALNTTATLRHARNKIDQTDAEMGVNILTRRKNVYDFEVQGKKGTDKMFPVVTKRRRADDFGDLIRPEEFARAEEEDNVAGEPSRGDAAKKENAVGQKRKWDGVADAPAEPESEPEDDPDKIEGPAKVFVGSETLNIRCRITYIDFSGLHDRRTIQTLIPLIKPRNLIFVAGEESETKDLAEELRKTLSSIEAGSNIDVFTPAVGVLVDASVDTNAWSVKLSRSMIQNLRWQKVHGLGVVAITGRLQAASLEPVPKEEEDEAPAKKRARLEATPAVPVSQEASDDTPVLDVIPMNMATAVRSVAQPFHVGDLRLADLRKLMKASGMEAEFRGEGVLVINGTVAVRKTAAGAIEVDGGAYSFVDPRSGDAATFFKVKKKIYEGLAVVAGN
>Arab_Me14_ctg01_-_Arab_Me14_ctg01g466t1
MSSSTSIGPSPPGAPIRLSTSSSPPPSMSSASDSPLTTPNFDSNIFSTSDSQSDSRRNSHTSPDDIIPKVEEAELDLADVKEETDDTPISPTEPVRIRRARGRPRIHPPRSPTTLSKQAKARSKTGCTTCRKRKKKCDETKPFCLSCQKNNIHCEGYKPLEIWKSGKERAAEARKRSEDIQFDLPPLMEGVESDLDRSLLQHFANRASAVLTLHGDKATNPFTKILLPMALQHEGLMHSVLCLSASHMYSINPSQEYEDRQAFHRGKALQLLKHDLERQKAGEGGVMVYEDSNVAQILLHLLHSICDGNTSGEYRMHMVAAKQIAMSQKSANPEFQSLFDEFFYYHWIASQITSMDGTDVPMMDDFSLPFKINPETAGLIGVSDGLFGFISKISNLRRRLRSRIDNKVEPTMDYEALLAAHAIDSGLRGWVCPQTPGTPRYTISMLYRQATWVYLYRTTKSSDPHAYIKSAVDDGIRYINELPAEGWIQSNVLLPLFLIGCAAFEQQQRIEINRAFAGLIACTGLGNIGFAKEVVDDIWKLMDAGDQESWDWEKIINQKGWDFLAT
>Arab_Me14_ctg01_-_Arab_Me14_ctg01g467t1
MESTGKSRAGVDHRSHELGAEAGVPAKEQGIDKQKQPLPESIHPVRSHASHADNAISLREVDPVSVRLEHLSVSVDESPNALAKAFSKKKAVAGQSHVKKILDDISADLRSGTLTAIIGGSGSGKTSLLNQMSGRMRGNRISTSGRTLFNGSEDTLNIKSAYVIQQDILLPTLTVRETLAYAAQLRLPSSVTLSERKQLVEEVITELGLKEAAETRIGNHAHKGCSGGEKRRTSLGVQLLSNPSLLWLDEPTTGLDSTSAYQVVKTLQNLARKGRTIVVTIHQPRSEIWSLFDNLILLTRGSPAYAGGAEECLNYFAQLGHTMPPFTNPAEYLIDVVSVDNRSEEAEAVAEERVEHIKRAWRLQYDKMSSEKGEQSFLTAPAEPQPTKVLVSRHSSMIQQIRVLTTRTLVVTIRDPMGMFGSLLEAISMAVITGWIFLHVDGSLSGIRSRQGALYNAAALQGYLILLFETYRLTDDIQLFDEEARQGVVSIPAFLISRRLARFPIEDLPVPLIFSLIYYFMVGFQADGGEFLIFFSVILLEHYIAVCFAMVCVAISRNFAGASLVANLAYTLQSMACGYFIQSNTIPIYVRWTKWTAYVFYAFGALCANEFTGSFYDCPAGGPSDEACKEYTGKFIMDSLGFPKEWIWRPILALIGYVFAFYVGAAVLLKYWKAEIAMARARPSNIDGSAGKEKMSEQTPNEIRTINIRLEGFGLNIEKRTLRKQTTKSILNPLTAEFQPGSLNVIMGPSGSGKTSLLNSMAGRLKDDLSTRYKAFGTMTFNGLAPSEDVVHSICSFVTQDDDALLASLTVRETLRYAAGLRLPKWMDKQQKVQKAEEILLKMGLKDCADNLIGNDVIKGISGGEKRRVTIAVQILTEPRVLLLDEPLSGLDAFTALSIMDVLLGLAHEGRTLIVTIHQPRSDLFARFGNIMLLARGGHPVFAGPAIQLLPHFAAQGYVCPEHVNPADFALDLITVDLQHESREEASREKVRMLIEAWHPGLFPATRTGSIATPAELGSLAREPASFAAAYSILIRRATKNFFRMPDLIVARIMQVVGLGIVLALFFAPLKNDYFAIQNRMGFLVEIAPLYFVGMLNNIATYPTERDVFYRDYADRIYGVEAFFLTYISITTPFEIISCIVFAILTVLACGLERDASTFFIITFNAFCITSCGESIGIAFNTLFTHTGFSVNIMSVFLSVAQVMGGVLSLSIPSFLQAFNHLSPVKWAIGNMAPYTLRHQKFTCEDWQKINKQCPITTGQQVLTLYKLDKDPDMYIMALGICAVVYRFLAYVVLKMVKERWLGRLWRKMGGR
>Arab_Me14_ctg01_-_Arab_Me14_ctg01g468t1
MSPQIPSPDFTTLPTDLKTLVVDHISRPTDLKSLCLTSKQLREITVRRLYRQVTIDVGSSKDTRLGAFLNPKNIGLPHIRKLDLYLTEVLDKCNQIHQANFAVRMILELLPENILDKFSWHPWSPFSADNLVLLYKKQKRLKWAESIALDRHVLDQLQKIPGFKEQFANVRKIGLYPDSREVLEYCHFILKHTSNLDKITLHASFEDSDVPIPDRELNDSSTGPGLITSTIFSHMQPFAKCTPLALKEITLQKLGLRYAADTYCKLIDFRTVKSIRTFTCTGTDALFAELSKSTKLPQKLDTLEVKLADNPENDGLGALDGFLCLVSGIKVLTLDYSGVNSLPASAGIVRHGKTLIQLSIHASRAPEECDDELVYDYASFSQICKDCTLIEQLSAAFPKVSVVRPKSESFANFENCLGDLPSLVTLNVTTWPTTHPSSSKLPRKIYEHLLAGLAQQGFETSAKHAKAQGRSSKLAIVAFGASDRVYDREDSENQIIFVKGRQTDPLGNEKSTAVQIGWCLRKFIDAGAKSDVLDFSLSHTCRPPTEDPPSSEDSD
>Arab_Me14_ctg01_-_Arab_Me14_ctg01g469t1
MKISSPSGLHYPIVVLELLKKPDDDVTRSERLFTYTYESTVTETDKWGEDKTLKKKLTAHFDASTEGKISRWYIKAGTVVARSGTEIIEIEEPCTHEIQFGGLCAECGQDMTKVDHLTQSRNTDRATVNMTHDNVALLVSHKEAVRGEEETKKRLLGAKKLTLIVDLDQTVIHTTCERTIAEWKADPENPNHDAVKDVEGFQLADDNVSNVAANWYYVKMRPGLKAFFDRISNKYEMHVYTMATRAYAQAVCKIIDPERKYFGDRILSRDENYTDKLKSLQRLFYQNTAMVVIIDDRADVWQYSPHLVRVPVFNFFPGAGDINASFLPKQQELVTQSRPAPAPTQRTENVPVATPDAGESTEVTPVEGTDGVPDALEQQLLSMASPETLDEQTKEQEKVIIAQQTERPLLQQQLMQDKADEEAECSEEPVAIANGDLQHSEPPKQRHSILHDDDRGLDVIENNLNRVHAAFYDEYRRSKAVGPAGRVAALKGERSPKKRMNDTIPDVAELMPEIKEQVLGEAVVVFSGIIPLGVDVQTSDFALWIKSFGAEVSTNISRRTTHVIANPDRKTTKVKKAARYEHIKIVNPEWMLQCCSRWEHVDETPYLIEIDPADRGGSPFEDDSINASGDEETDDVADSPVTLNLTADTWDSVDDELADFLDGDDTDGEHASESEGEGSDDSTASTCSKNQKKRKRTNGNATDGSEAEESDSSVTSTSRLQRRKKRTMERVTSLANVVSAEKSSGLPTPEATGPEAVSTGDEKEGPEGNGVAADLQDDYDDGLEAELLAGFDSDDGEA
>Arab_Me14_ctg01_-_Arab_Me14_ctg01g470t1
MASQDRGRARSSRRLSKKRRDLDEKPRRRSLDIPERFKDGEDADDDVTAPKKNNTLSMNQSIFSMIARAGQQSHKDLATMHEVDSGDSDEEGKKRQAYHGLDGAARLSRLSSANDFPQPTEELQADQSHQGKQHRRVLSEHKLLRSLPRPKSRKDARSKDHPMEQMSSSQLLPPRPPLPESSPSVSPSERSSMTKPKATADEDTNVENVRSSERSSSYGSSAGMAKTPAVPVTLAQRIRQIFEFEDVEEVISEYPCWLLQSILLQGYMYITQKHICFYAYLPKKHYDVSKTGYLFKRGRSKYNRYWFILRGDILSYYTNPAELYFPRNRINLQYAISAEILEARKKNEEETAFTVTTDEGSFQFKADSAASAKEWVRSIQKVIFRTHNEGNSVKISLPIQNVLEIEESAILDFANTVKVRVIDNDETFAIDEYFFSFFNNGQDALNVLRIMINDNEHHQTTESHNDPEAVTPTASPNAGAKSPYGSPVVENVRATLSPLPAPHAGRSSIGNMSARSSVDACRKGWDARRSMDASRTSHRPSQEVRRSFSRGRHDLQTRRRPGDQSPLSPRATDTESATTSLERDTESSAAIQSMDESGASASQILNRSDVFRAPANHSPVVASDLSGPLARYSHDTTRSSGRGRQPPKTTQHLNSGISAKAPAVASETTEDDVEAGLAQPRLSGSSSALQDIASYPLNKATGLAGFLRNRSKKMGNLLATESMGYYEKVSGMLAGGRKHYNTVEGLETGDEVHGYEDDEDAVKAAENFREHFAFPETEILQSSFFASLQRVLPNYGKIYVSGKYFCFRSLMPTSKTKIILPMKDIENVNKEKGFRIGYHGLAIVIRGHEELFFEFSKAEYRDECAITVLRILESAKYLEDRYSSSSGIDSDDEAAKAEHDLLQQARKETADDPQIDVSDIVHATDHDRIPLIFDDPLASFVDFKPAESLTVVCLTIGSRGDVQPYIALCKELLKEGHKPRIATHAEFEPWVRKHGIDFAPVDGNPAELMRICVEHGMFTYNFMKEANSKFRGWLDDVCSSAWRACQGADVLIESPSAMAGIHIAEALEIPYFRAFTMPWTRTRAYPHAFSVLEKKMGGGYNSITYITFDAIFWTAISGQINKWRRRELGLQNTSQAKMQANSRPFLYNFSPHVVPPPLDWPDWIRVTGYWFLDEADMYEPPADLKAFIEKARSDDKKLVYIGFGSIVIDDPAALTKTVVDSVLKADVRCVLSKGWSDRLETKDASKPEIPLPPEVFQIQAAPHDWLFKQMDAAVHHGGSGTTGASLRAGIPTVIKPFFGDQYFFAQRVEDLGVGVWLKKVNTSVFSRALWEVTNSQRMIVKAKVLGQKIRKDNGAQVAIQTIYRELDRARTLINKHARQGDEHTDGFEDDWTMIEDGDKVDVAPFEAQQAVTGMTQNASRTGGGMLALGSMTMRGAQTRISESADRG
>Arab_Me14_ctg01_-_Arab_Me14_ctg01g471t1
MGKQGSSKRLGAESDWRGPMHDLIRPPSPKPHPQPSLQAAPSATLCPSPSSTSPASFECIPPFYHISTAIMKTAILLAAGALASPAVAGVHKMKLQKVPLSEQLKYANIQEHAKALGQKYMGIKSENHAEQMFKAPYVADGTHPVPVSNFLNAQYFSEISLGTPPQDFKVVLDTGSSNLWVPSSECNSIACYLHSKYDSSSSSTYKKNGTSFEIRYGSGELSGFVSNDVFQIGDLKVKHQDFAEATSEPGLAFAFGRFDGIMGLGYDTISVNKIVPPFYNMLDQGLLDKPVFAFYLGDTNAGQESVATFGGIDESHYTGKLINIPLRRKAYWEVDLDAITFGKETAEMDNTGVILDTGTSLIALPSTIAELLNKEIGAKKSYNGQYTVECDKRDSLPDLTFTLTGHNFTIGAYDYILEVQGSCISAFFGMDFPEPVGPLAILGDAFLRRWYSVYDVGNSAVGLAKAK
>Arab_Me14_ctg01_-_Arab_Me14_ctg01g472t1
MAAYANTNTNTNTKMPQQQRQSALGNVPRVVIRPVWDNMVAVSYLPKGIVFFARHPYLYPMLKTRLLPAFLLSAFVLLNLFVWTFLPQVAFLSIFHKGGSAWVNGTFLVLGEGAAAVALLFEAFLVDETQVDIFDAVMIHKGYEHLVRQHRPVSDEQLNDPVRRLGRPTKTSVYAPFSFRQIAEFVILLPLNFVPYVGVPLFLLLTGYRAGPLQHWRYFQLLGFDRKQRDKFVSKQRWQYTWYGTVYLFLQLVPPFSMLFLLTAAASSALWAADLETARREHEERIIAPQYSDEPDAVV
>Arab_Me14_ctg01_-_Arab_Me14_ctg01g473t1
MNNSQFRRLLLSDQAKPQDGSSQSASPASRTPASRTPGGALGARKHSSIPMTPRQVGRGSSVQADFARQLAERNAKAHPQKKARASAPKGTQLAAGYTDRTKERVDDDDSELAKRIKNLDEAMRLGQIDRETFEKLVQDMTGGDVGTTHLVKGLDRKLLERVRRGEDVLAGHKDAAAVGGEEEEEEEEEQVEVASDVEDAFDELAEADVGPLTRQQVEKKGEKLMAPPPPPLPVAGAKRTRADILAELKRQRDEAARAAEAEHAKRFPTLGPGFRKVTPQGERSRIETDDKGREVLIITGPDGKEKRKVRKQKAEPQPAPEIRHDLDDATKPINMHNLPAPKQRDEAKSDDDDIFAGVGSNYNPLANLDDDEGDDDDEYSGEEGKAAPEAIVEKAPSAPAAVPVFPGPETEEGLAAGASKPSGPTPSAKRDYFKSRPTQGTTPDNTSGLSSADATVRAALAKVRNLDEKSTLLQNLSSANPSDAESKEARLKKRAAELAASDRDMEDMDMGFGESRFDDADEMEREGEKVKFSEWKGLGTGGDDEDEDGLKAAKKRKRGPKKRKGDVNNADDVLQAMERQKEKKTKTLG
>Arab_Me14_ctg01_-_Arab_Me14_ctg01g474t1
MFRTLLVAALAAVSACYTTPNATNSTTTTFKNPILDTVAADPWVFRHGDYYYMTYTNNENITLQRSKVLTDWNNAEFKLLFKPPPGMNYSTDLWAPELHGLDGNWYIIFTADPRNDSPPPETDMWCEYNCPAVNHRMYVVEGIGADPWTASYTYKAELNTYDQFSIDGTYFQHNDQLYHIYSCWYRKYDGWPANLCITKMSTPWTVSSPFTDRQIISTPEYAWEKTPFGRASNDRLSSNEGPQQLINPETKQNFLIFSAARSDNRNYCLAQLELVGDDPMNPSDWRKHPYPVLYQNPGAEAYGVGHASFTTSPDGKEDWIVYHGMQDPTNGWGARTIRAQKFTWNEDGTPNFPKPGYGPYQIPSGQ
>Arab_Me14_ctg01_-_Arab_Me14_ctg01g475t1
MARLALATCADTTTAPANAPEYGTMPAPSVPVTYASSYYGSEVDVDVDVLSVASMSDYGSEFDATDINEDALLASTLDSIAQHRPSATDKGVLLPSIEFEQGEVEDEDHDDLVVVHKPSLLRVAKKDRRSARHTNTRRHVQSSPMRDTLEVEYDERSRRAWSVPLEEPQPAPQPSRTRFSRTNSVPASSRTLSVPTAAESDTRPPIERFRTKPKKPLSVTDLVSPAWCELQYFYTLSRFGRKPRTQAMRTGSRIHQKLEDEVHTTVPVQVQSKEDRFGLRMWNAISGLRCLRDSGLTRELEVWGVIDGQVVNGIIDEVSYECPDPALEEHVELSKTQRSGGTVPLPKDQPSIAQAFAKASGADNAGDAWIGRPGPDRQIYIADVKTRGVRTKPTGASLRPTWMQLMLYRKLLESLSLNTVDAETIFARYDLKPLEPFTEVFLQQVGGVDPENEVANFPNLLSLWSFLVTEMQLAIPPFSLSSILRAEFHYSKTGDVIGSELTVYDTSVIEKYIEEEMAWWKGAREAKGVEVEEAFKCRICDFADSCTWRQKKVDEAVEKSRLRRMEREKSAV
>Arab_Me14_ctg01_-_Arab_Me14_ctg01g476t1
MAPSPSRAMSDRPAVTLSARAPSRLRVQGNRPCHGCSYHGCDIIQSVVFTRKPRSTKSNMTWQQEFWSWMSPSRVPTAEPPAVGEKAPSTHKLTVPKDGKPTIVAFLRHCGCPFAEKTFLNLRDAAAANPNVQFIAVSHSDQDSTDRWLASLPDTSKNTQANLDVVVDAEREAYGAYGLGVSSFMHVVSLAGLSNLNKLGKEEGIWNRPTESGNRWQTGGNYGIDRNGTVQWSGKHERADDMSDFKEGVALVTAH
>Arab_Me14_ctg01_-_Arab_Me14_ctg01g477t1
MARTKQTARKSTGGKAPRKQLASKAARKSAPSTGGVKKPHRYKPGTVALREIRRYQKSTELLIRKLPFQRLVREIAQDFKSDLRFQSSAIGALQESVEAYLVSLFEDTNLCAIHAKRVTIQSKDIQLARRLRGERG
>Arab_Me14_ctg01_-_Arab_Me14_ctg01g478t1
MTGRGKGGKGLGKGGAKRHRKILRDNIQGITKPAIRRLARRGGVKRISAMIYEETRGVLKTFLEGVIRDAVTYTEHAKRKTVTSLDVVYALKRQGRTLYGFGG
>Arab_Me14_ctg01_-_Arab_Me14_ctg01g479t1
MAASPHRPVQNDLSSPTPLPRASARPISGITMALSPPPRALFFDVFGTCVDWRNAVVKELEAQAHVALNSATASLASRVRLTASDMTEQHWASFAQQWRDGYKKFTQRLATDPSVPWKSVDEHHLESLKQLVSDWEIDGLWDEEHLRAISLVWHRLDPWADSAMGVTMLNRLFYTCTLSNGNLSLLSDLRIHSAIPFTHIFSAELFGTYKPSPHVYLGAAHRLQLPPEQCAMVAAHLNDLRAAKDNGLKVIYVERPDEEDWSREQVERARDEGWVDLWISSGNGSKGFITVAEKLGIELNAADQSRRLIRVHQPGVPPSGSTEYKFATVDSILGQQKPEATNPEPQESFVGAATYCRSPWAVEGTSTMSPRHIQDEVYAASMKDPEKFWTRHGENLYWHKKPTKAFQKSTKFLPKSNMEHDSWSSYTDGEISTTYNCVDRHVASGNGGNVAIYWDSPVTNTKEQYTYKQLLEEVETLAGVLGEEGVKRGDVVLIYMPMIPAAMFAMLAIARLGAIHSVVFGGFSPAALAQRIEASRPVAIMTASCGIEGSKKPTGYKNMIEEAIRRSKVKPSKTIVWQREQLRWDPVVKEEGQRNWQRLVKSAKDRGLKAEAVPVKSGDGLYIIYTSGTTGLPKGVVRSAGGHAVGLHFSVKYLFGIHGPGDVQFTASDIGWVVGHSYIVYAPLLVGATTVLFEGKPVGTPDASTFWRIVQDYKVTTMFTAPTALRAIRREDGENTLFEKRYGEKGALTSLRALFLAGERSEPSIVQMYQKLLSKHCAPGAIVVDNWWSSESGSPISGIALSASAGLNFSSSDRPVPLRIKPGSAGKAMPGFDVRVVDDAGKEMKRGEMGNIVMAIPLAPTAFTTLWEDEERFYKGYMKRFDGKWIDTGK
>Arab_Me14_ctg01_-_Arab_Me14_ctg01g480t1
MSRADDVINVAAHRFSTGAIEQAMTTHPSIAEAAVVGIPDALKGHLPFAFVTLATHPHPGRAVPDEKLLSEVQKLVREQIGAIASLGGVIQGKAMIPKTRSGKTLRRVLRELLENATHEDFDKEVNVPSTIEDGEAVKVAREKIREYFEVKGKHLHKATEVKAKL
>Arab_Me14_ctg01_-_Arab_Me14_ctg01g481t1
MAGKMTLYKLVVLGDGGVGKTALTIQLCLNHFVETYDPTIEDSYRKQVQIDGQSCMLEVLDTAGQEEYIALRDQWIRDGEGFVLVYSISSRSSFARIQRFHSQIQRVKETAMAGSPTYPGSPISASAPVFGQAPVMLVGNKCDRVTEREVSTQEGQALAKDLGCDFVEASAKNCVNVEKAFFDVVRQLRRQRHQGSGRHSDRTEKTRGPRGPANDRVRGSGGDRGGNNGRSTKRKDKPKCIIL
>Arab_Me14_ctg01_-_Arab_Me14_ctg01g482t1
MSAYPDPNENAPHPYTTLYPQHPNTQQLDGQTSRGLLGAPGVSGAPGVSYPPPPEPGYPKIENINEVLQAQALHANHALTDQRPLPPPGQGHGQVQIASAQQQSNIDSNNTNHGHGHGHSHSHGHSHGHNHKPNRLRKACDSCSIRKVKCDESGPPCRACLALEIPCTFDRPSRRRGPPNRHAEAIKKRRLDETDPASGQPSPQSPTNAAHALAQLQSSTPTQLSADAICPLNTMNALIDDFFTHIHPLCPFPHEPSFREAWARREDYTNPSFLALLASMIACLVASFPRKPRLHLKTQTRHEYPSHLSLVDKCREVCTQARGPGYLDRPSLNVYDACTSYFLGLTGAYVFQWRQLRLYFAECLTIIRSLGLHKAHDQGYTHLGAVPSAWGSDGPNFDGAHDFKLDHITEQIGRRLFWTVFVGVRTIQQLGASFSELTIAPATPTEPLPPLPVEVDDVHIFPDEIQAQQSGVIPLITGFNVNVRIFLSYSSLSTAEMAFGMDEVFDWDRQQRIFEQSLQRCRQILESLPDVLKVQSKAARDNLAQPKQPYFPPLPDFDGMREPALNSFSTAEAQDLRRYEIQKANVYASHLATRSYLVEKYFMLQEKASTKAQSNIRSSPSALATGLDRFVSSSTSDAEALEKIMSEERELVVKDLLVVLGSIDMVNMEPNGDSFVSILLQLRDSDFLYQADELHLSCPTHFILHTQNLSPIASLRFVPTQIQKIRSIASTLLVVPKERKGSVALQHQDYLYKFLEILGKLERASPEASDPSDANMDEETELRLWADLRDHQLKFQEQGGVYGFS
>Arab_Me14_ctg01_-_Arab_Me14_ctg01g483t1
MARKAIAKDQIVKLIVGAGQASPSPPVGPALGSKGVKSMDFCKEFNARTAHYNPGTPIPARITVRPDRSFHFSLRTPPTATLLLSAAGVAPTKSKIRGAGNVPGPMNNHEGQKGKTSTNSPTIGNAVMGTVGTVSLKHVYEIAKIKHSETRLSGLSLEGIARSVVGQAGSLGVVIVP
>Arab_Me14_ctg01_-_Arab_Me14_ctg01g484t1
MGECTPAKPVVRLYGGTPHSTERLHKPFKCPGSAASTRISEKPARKRRKVDYAGADGADGDDKPYSNDDRLALATRDINRFPVFKPKDKDTAFRARFSVPLLNKDATSYNANRPAPLLGMRLGAVFVARPLHDPSGEFAIVLYDPTVDDKPASTEEVVPKMSQEEKKEMDTPVVHKSLAEILGLKKKVDEERPRVPVVIDPRLTKVLRPHQVEGVRFLYRATTGLIDPKANGCIMADEMGLGKTLQCIALMWTLIKQSPDAGKSTIQKCVIACPSSLVRNWANELVKWLGPDAIHPFAIDGKATKEELISQIRQWSIASGRSVVRPVLIVSYETLRLYVDEFGQTPIGLLLCDEGHRLKNGESQTFTALNGLNVQRRVILSGTPIQNDLSEYFALLNFANPNYLGTRADFRKQFEIPILRGRDADGTDEDRKKGDERLKELLTLVNKFIIRRTNDILSKYLPVKYEHVVFCNLAPFQKDLYNHFLQSPEIKSLLKGKGSQPLKAIGMLKKLCNHPDLLDLPMDVPGSENVLPEDFVPKDARGRDRDVKVWYSGKMLVLDRMLARIRAETNDKIVLISNYTQTLDIFGALCRSRGYGCLRLDGTMNVSKRQKLVDKFNDPEGPEFVFLLSSKAGGCGLNLIGANRLVLFDPDWNPAADQQALARVWRDGQKKDCFVYRFMTTGTIEEKIFQRQSHKQSLSSCVVDSAEDVERHFSLDSLRELFMYRDNTTSDTHDTFKCKRCRKEDGRQVLKAPAMLYGDTSTWNHFVNDGESGPLGKIQDLLLRQETAQGCNEVSAVFQYISH
>Arab_Me14_ctg01_-_Arab_Me14_ctg01g485t1
MLSGPPRLVPFLFVAFVLALVVWYRHGVSGTGASASLSPWKLGSALSTERPSSLRPGVDPLDFSIPLRFSEGQPKPAGSNYTFKIVVPKTTKEDLEWMQQEIPHAPLVVYEVDNDKAENKVPKNKGREAMVYLSYIIDHYDDLPDTSLFMHAHRHAWHNNQLMGLDAAQIVNRLNHDRVARLGYMNVRCHHDPGCPDWIHMDRPGGDFDFFHKPEEIYWRKSVWEEIHPGAPIPPSISGICCAQFAVSRDRIRQVPLERFQHYRKWLLTTGMDDQFSGRIFEYIWHYIFTGHEIYCPAMNTCYCDGYGICFGGRQKFDDYIKKQDDRNAKWNQLDEFNKRADKAKEDGKEPDFTDAEKVTMDTLKRTIGDMDVELDKLREDARKRGDDPKLRAEETETYDSSHIWDYAPHGEKL
>Arab_Me14_ctg01_-_Arab_Me14_ctg01g486t1
MLTATIQLRSAGVGARPEPTSRCKVQVTPSLWDYPRSHAANHSCPEPTTSEKDVLESLKYEWERLEEDKPAPETSGLGRRNVIADLLDFEIYRCPLKDQKRSSELTSLHLFDVKAKNLSFDGYVRLGQVEHYVERIQIQDLSIEGYGSREDPDIVAYIQTRLASIETTHDIWLQLKQPASRYKRFHAPFMWVATLGKHAIDYMDDQKKNTVGLESFKNDFHCWLIQRFGSNKKFTEWFAAFGNVRDFRVALNAYVDFFYNQVVNLSTSKHLISHPVWSHCKCNRTMAIERQPDVVKDTLATPHVFESFKHVYFASKLKPASPSKAVKEMQHLRKQMLGFAEDRTAQTSSEHTVTEFTSDSGARVGDVVSSSRTRLIKPIGESLVLSGLPMSKESNIFATVRSDFWFYGSIALPTLTCVSPNILLQTSVDWNPKSLNTGKDLIIRQTYITQDSAFVTVTTDHTMCPCRKPKARFMDWRAGDTVYITEYTNGQQRLEPVVIYKIDYNAGEMKARVLLRLARDCLGLALEARRTRVAPNELVLTDKLKVLPITRIKRACRIRFVQRHDVLSHQVPSPYDQRGAGDHWFISMGLHFEDDVWRLNFLEALPAGFHEAREAPLPCKKLRGLSLFSGGGGLDRGLEEGGAVEFQTSVDYDPAAIHTQRANCHDPQNMRLFCGSVDDYLQKLLSAIQSNDVACVGKVDLIAAGSPCPGFSALQQNMLSQQSLTHASHVTTFCTAVDVYRPLYGILENVINMASTRTGFEDQNVLSQLVACMVSMGYQVNQFIMDSWSYGSCQRRSRIVLTIAAPGLQQILQPPHTHSRSYEETVARSLGRLPNGERFGDREYYPTPFPHVSAAELTSDLPNIGNGNVQTCVLFPDHRLSRPTNGKDRALLEFIPRQPPGYGYAEAMQLELVPPLLQMRKKEMGRAYRRIKADGLIPTITTDLNMQDARNGASVHWSQHRPLSIQEVRRTQGYPDHEPIIGSLNEQWRIIGNGVDRKVSFSLGLTLRDTLTKSKCITEPANGLENETELFVDVDQVLKYRLTEAARPSNVNTLQETSVSSSAPVSTDSFSSTCETKPRFNVSTLLDKVNNESSQASLRLTSLQRFIEVKEQVAPTSFRRSSLSALSTSMQSARQYPSIKRQREDWAEKQEEGPKLADKTAGSFKRAKFGRLQRSGT
>Arab_Me14_ctg01_-_Arab_Me14_ctg01g487t1
MSQLVTPTIRQGGVNQVYVMPNLVPPVTSVQAALEYRDRLRAIEPNVHYLMSLYLHEDITPEVIREAKKAGITGVKSYPAGVTTNSSSGVLSYEPFYPVFAEMEKQNMILNLHGEVPSTPANTHVSQTGDSASITILNAEPAFLPTFRSLHARFPNLRIILEHCSTAAALDAVRACGPSVSGTITAHHLSLVIDDWAGDPFCFCKPVAKTPEDRDALLKAVVGSQGRFFLGTDSAPHPSTKKRGEDKVAAGVFTQPYALGYVLDALQVGVERGVVKEEEVSQEVLEGFFGGYGRKFYQVRDEKNERIMLKKGGEKIVDVLNKDGVSVEVVPFRKGEQTWSAEWR
>Arab_Me14_ctg01_-_Arab_Me14_ctg01g488t1
MTSHPMQQCCVIGVKHEGTPKGDIKNIGDIRAYITYPENRSTQNAILIMTDVLGFEFPNVQLIADQFAANGYFTIIPDVFNGNTVPLNPGPDFDFPTWKATKMPREAAVDPIYATVIKHLRGELGVKRLGGVGYCFGGKYVCRWLKEGGLDAGYTAHPSFVEVHELKGIKGPLSVAAAETDFIFPAEKRRVTEDVLKEMSVPYQMTLYSDVEHGFGVKGDLSHQRARFAKELAFLQAVLWFDEYVKKETHDTPIPNPSC
>Arab_Me14_ctg01_-_Arab_Me14_ctg01g489t1
MPLHLLGKKSWNVYNPANIARVRADEEAAAARDAAADQRMQDLDAERRAALLRGRTPPPLPEEPATHSDRTRAREGGHDTKRRKLAGEDDTDMDIRLAASVANPTHGDHTDAKLLKLRTPTSDAPLTDHAGNIDLFPVDVKEALKREKNADAEKEKRRRELAFEDQYTMRFSNAGGNNGLQEPWYTARQKIAHPTYATTAAPESSGFDTKNVWGNQDPRRKEREQARISSNDPFAFMQKAQTQLKKSKQDRKKWSDERNRELGELRDAQEKEERVQADIKIVIAIVDTHIVGPLHRDITGVEALVAGHDKTSTLTHDQQVIHELYTSGSFPNHQVKPYPH
>Arab_Me14_ctg01_-_Arab_Me14_ctg01g490t1
MPTWLVHGFRWPRAQVRIHTILQNLDDVAPEWVMAPATQACLTDNFKQQWPDIMARLPTLRFIEQYDPDDLTVKDQPYAYVCDQVHDIKLGIDVDELQQAPALSDEQLAAVAELRDKVTPDAKLGWFVVVNGDVERWAPPLDDDDDDDDGDDGLQHEEDEEEAETKTLSPPARSPGSSVWTGNAQEPVRPSTSRSMKNWIGGMLRKTRR
>Arab_Me14_ctg01_-_Arab_Me14_ctg01g491t1
MSRRDFLSMPAPENYVAGLGRGATGFTTRSDLGPAREGPSEEQMKEMLAKRAASLGQAAPSAYGVTEKKEEEDDEADRFQDPDNEVGLFSSGMNYDKDDDEADRIYQEVDEKMDKRRRVRREAREQQERDEYEKNNPKIQLQFADLKRALGAVSEEEWAALPEVGDMTGKAKRAREARMANARSYAVPDSVLSAASKSGELETSISTGDSDSGTMTNFASIGAAQLSALTVRLDSAASSNPGTQTTTTSGTATSVDPKGYITALDKKEMQGGEVPVEDINRARVLLESAVKTNVNNGPGYVALARLEEVAGKIHTAKKVIQKGCDMCPKSIVVWEEAIRLNRENLHNAKIIAANGIKLNPKAIVLWKAAIDLEQTPAARKKVTRQALDHNPQSVELWKTLINDTEDIENVKLLFAKATDTVPLSEELWISYARVSDADAAQQVLNKARKAIPTSWAIWVHACRLQEELGKVDICDKIMERAVKALIKENAMIKREEWLAQAEICEEEGDKVTAGSIVKATIGWGLDEDDERRDTWLEDAKSISNRGHYETARAILGHCVSVFPYSTTVWHASADLEKHHGTTESLLSVLERAVNACPNSESLWLLYARERWQAGDIEGARQVLGRSFEQLPGNENLYTRAVDFEADAGNYEQARSFLKVARDSAATDRIFMKSAVLERQLGDYETAIDICNQGLQNWPGSWKLHAIKGQIYEQLSKLKEAQEALSIGTRAAPKSPMLYILLSRIQEKTGAVVKARSTLDRGRQQNPKNADLLCESVRLEHRQGNIPAAQKVMATALQDCPTSGLLWAEKIMHLESRTQRKPRALEAIKKVEKDPQLFVVVARIFWSERRLDKAATWFTKAVVLDPDYGDGWVWFYKFLEQHGTEEKKQEVLSKAAMAEPKHGEIWQSVNKDPKNARLGVEEVLKLAASKAE
>Arab_Me14_ctg01_-_Arab_Me14_ctg01g492t1
MAAPGGKFFIQDDMSKPAAHHESYAQLWETKWKKPAEMGVYPFMFGTAKDFEPIVSELTKGNFKEPYNWDEYAKVYFPQAEHLKSIAKEAEATGEKEKASEYYLRASAVYRISRFPAPRSGVQREAWKLGKECCIKGLGMREHPVHEVEIPHKHRSNNEGEIIPVYLLIPNTATKDKPVPTVIIFTGLDGYRAELAVWMEGWRRVGVATIVLEIPGTGDCPATASDAKSPDRLYSSLFDWIDEQPLLDNKKTAIWAFSTGGFYAMRVAHTHADRLAGVVALGGGCHHMFDREWLDNVNHLEYPFDLANTLAYKWGYGDDVETFKKEAKSKFSLLEDGTLDMPECARLLLVNGTEDEIFPIDDYYLALQHGAPKEARFVTGIKHMGEPISFFIIIRWLYKLFGIEADVAKQMQTIPFKAKY
>Arab_Me14_ctg01_-_Arab_Me14_ctg01g493t1
MQIQSSSPSGIGKALQQLDGKLEANSIVYAGEARHMPLLGSFDLTVSEARMFAHLDLGPDGATETTPDSSVKGIGVPKRRDTVSTFNNDLRNFCTGQPPKQSFLAPGGRTPPRFRMSRRSTLADKPELDSLLKTVMITYKGKEFLPLDENTVHRLSQYLNGSKPLAPTCLFTRLMITSDANKIRADRFVATLEQVGVYCKHLAIISPFHAIEFGNVFACEVDTLESGSDWERILQCFPNLQTVIFEYPAGEPTILTRDTFYALNCALANSTTLKKIEKVQLDVPPRVLFDYHCDYHYGQRQCHGPSPHAFSATSLPLTMVGSDMVYADDVEASDLLDVDVVFGKVETTDEVDAINKFKTETIPL
>Arab_Me14_ctg01_-_Arab_Me14_ctg01g494t1
MVTGARKPPSRKGSMADMPRDLKEQIEKLEELFVVPTQKLKEITDHFVKELEKGLTKEGGSIPMNPTWCMAFPDGNETGRYLALDMGGTNLRVCEVTLTDEKGEFEIIQSKYRMPEELKTGTADELWGYVADCLQQFVEYHHEDEQLEDLPLGFTFSYPATQDYIDHGVLQRWTKGFDIDGVEGHDVVPPFNKALAERGVPIKLAALVNDTTGTMIASAYTDAEIKIGCIFGTGCNAAYMEECGAIPKIAHLNLDPKLPMAVNCEWGAFDNEHQVLPRTQYDVIIDKESPRPGQQSFEKMVAGLYLGEIFRLVLLDLHKGHECAIFEGQDASKLERPYSLDAGFLSAIEEDPFENLLETGDLFQNKLGITCSKPELELIRRLAELIGTRAARLTACGVAAICKHKNWDQTHVGADGSVFTKYPHFKIRNAQALKEILDWPAKYGKGKNDPVEILPAEDGSGVGAALIAALTIKRVKEGQLAGIQDRDAMLKIAGKKPRAA
>Arab_Me14_ctg01_-_Arab_Me14_ctg01g495t1
MPQHQRAYGQPSESIGGLVALEWRVDVLERSIAQGSSGRHDEYVSISISKRNRWGEGHRELDTDDEDEQ
>Arab_Me14_ctg01_-_Arab_Me14_ctg01g496t1
MQGLSRGGVDKDEGNGDGKGKGKQLASDGETLGALLLLRSESTDGEGKWEKARTRTRRATGLAGYWAGGLLGYGATGLRGYWPIGLLAYWATDLLACWPAGETADACARERERPCACCLFRGTSPPLQVQPAVATLLCACVAAPVGQSTTPRQAHDEAAAFDALDALGPVGALDPRDT
>Arab_Me14_ctg01_-_Arab_Me14_ctg01g497t1
MAFASYSPHREAGTMHLDLPSPTYRLDGTHFAHLQQLRRSLSRSPSKPSRFQLHKSDSPRSPISPLALARAFSPKAHKPTSPIKTFFESPLAQAVPAKKKFTLRRPTANFKASPRARQNSKSPRRVLGDSPTGANSTTPFYTRPTVGQENDTPARPSSSDSLESMDTDCRKFGLNDKPIKFEFAHRRPDLSPGPPVKSSPLKRNDGVMNLSGTPTGFSPVAKRRSLHSVSNLGTDFESIFDRNSMHAVQSPMEEEETQNEFDFSTPANPSQSPMRRATSLRKSTVMQRNANSPRPKPAFDGEFAMPGLAASKSRNRMSLDSSLGQSTTPTQTPFRKSTFDAGRMGLPTPFVRSTAGASQPHPLSHAHTPSSTTSGLGGMTPMAPPRAPHFAAPPGRPNQSHQFSRSLPIGVPRPHAPEGEHDSFDTPFKSVQQAPVAFSTGLMSKKNRNADEPANVYVMPDTPSKRQSYPPAQADRTDVIDTPLVKRGGSLFGDFNRPQPQFGTTSTPFSAHVSKFSTGSFGKGTSVFGNMGGSLQRRGSMVSVDGDDDLPDSQSPTANRTMVDTDASIDDMPPTPTKGHGASSRRSKESSLRRKTFRSRPSIGNDTFAAPEVANDFNASIISFGSSSPGSPLDSSFQPAETNRLSIAGNRRGSMNFNSSVSTFPPATPTTPRDHSVFFAEDKGAIPIGLTKNDVDEAISSRFREVKELDGGEGEFSKVYRVSQSVQGSTQDTPAGSQVWVVKKSKKPYTGQGDRNRKMREVDILYALRGNDHVLNINDHWEANSHLYIQSEYCEGGNLRRFLDTVGYSSRLDDFRIWKILLELSQGLTFIHHSGYIHLDLKPANILIDFGGSLKIADFGLASSWPAPKGIDGEGDRHYLAPEALCGRFDKPADVFALGMMLTEIAGNCVIPENGTYWTKLRSGEFEHVLPSLTWSADSGTLSRDGNGDPIPESNVSLDTFLMSDTDIEPQSTVQIRAASSPEEDLARAPKFMIDYTDPNTMDQVVKAMLHPVPEERPTSEQVLQCFGCQWVDYRRRAGATVYEGNFGPGEDILATYALDDADADMMDMS
>Arab_Me14_ctg01_-_Arab_Me14_ctg01g498t1
MSALVSRSRAEAVRKRRAHAKSRKGCGNCKLRHVKCDEARPLCKNCKLYGVSCDYSGLQSSSFLNTPGSFQVHFASNYPDKTKPNNLIEGNALKMWMPPLKSISIHSGLPTIVNDSLNFNVRSLGWLTGSQHFTADQLMIVSRFRNRTSITIGNPQMAPLYRDLVCQLACKHAFLMHMLLSVTLMHDAHLANPSAVASKSSQEALRHWNTASKLFNEILSRPIPPSYQDAIWTTGVFLGAASFWSIGSTNPYEVWPLKPAEPDDLSWLKVGEGKKHLWRLAQPKRPDGIFYELVKNYNCHSVPEWMAMDSELHISDRMKRIFDITASSDEHDNIYYRPILTLSKCPNIQLTYENALKFLYILAVLTPDFFALLEAKDVRAVFIMGWWYMLLRTGDLWWMSRRARVEGLAIRIWLGRQQGGEELVYLLDEIEKHSELDDHAAPWFFEA
>Arab_Me14_ctg01_-_Arab_Me14_ctg01g499t1
MANCSLVAPGLVSQYGGQAPTFSYRQTSHSGDYFGIQMTYMNGASTCYSGKPNFTPVIQNPAQGFSVDCTFVISSSYSGIYCPSAPVTRIPNGVLTVSYKNWVNNQPTPIAFPATFGPSPAPRAVTATAGAVATSTATQTSTVSPGFASTVTVYAAGATQTYTNTIIVTQTRTTTNTNYVSSCAAPSVVSSSSRSPASSSGTSSSTASAFPTPSGLSNSCPEDDGKYVYTSAGTFQITCSYDRDGTTTGLFHPGNGLLGCVDLCANTRGCVWSTYYSAQDACYLKFGTGVPNYSTAAWSANLITASSSSTPVPSTSPAISSPISSQVATSSSRASSSSAAAPAPSPSSSSLSSPSPSPSRSSSSSAAPSPSLSSPAASPSSPAASSSSPTASSSSSVVSSASSPSATSTSITCPYDNGKTVNTASGAFVVECYIDRVGGDLSTEYPDGGFNGCIQLCANTPYCVDVSYFPNGPCYLKKNLGTPSSNNGVWGARSAAVPLSSSAVSSTAASSVITSSPAATSTSSATTASSSSSAAVTSSSVAFSLAAVSSEPAVTASSSAGVSATTTLTGPVATSSVGCPGSNGQTIETSAGTFLVECGIDRGGNDMVGSPVYPGSYEACVSNCALRPGCVVVSYIAFGPCYLKSGAGTASQNANIIGGRLISSSLSSSTAAASSDAASSSVVASSSVVTSSAPISTPVATSGAGSPVQTVTVTTTIGGTGYQCACTPTNNLGSGSASSAATSPAATSAALGCPSSDGSTFTSNCGAMYAIECYSDRYGYDIPGGPSYTNTLNDCIADCDSTDGCIDVSYIPGSPGPCYKKSSIAEIRPNNNIFGARQLTQCKASTKLKLHRKRVVRTPTELKKKIQKRGVYGPDYTFTQGATTTIQTTTSTVVRMTTITTTPANVGTTTETVYTTASTTATVTNSATVTQAQQTTVTTCPAVTRRAVL
>Arab_Me14_ctg01_-_Arab_Me14_ctg01g500t1
MKQSLPVVGGTDVPVDVGKLQVDTADNYAEDVVQGTTVKGLPEVDLQSRQVEQSLPVVGGVDVPLDAGKIQVGTVDKYVEDVVKGTTGL
>Arab_Me14_ctg01_-_Arab_Me14_ctg01g501t1
MANKRKLNEHDVPEEESPQLTKRRASDASQSDVPTTPSKPTTAPAASFAEFELEPRLLRGIRDQRWSAPTAVQSKAIPLALQGRDILARSGTGTGKTAAYLLPVLHNALRQKGKTSLILVPTKELALQITKVAKALSTHCGQDIRIQNIAGKESEVVTKAKLADNPDVVIATPARASANINNGALSVAELAHLVVDEGDLVMGYGFKEDLDQIAQSIPKGVQIFLMSATLNTEVESLGSLLCTDPVVLKLDDLDKDAQKVKQYVIKCAEEEKFLLIYAMFKLRLIKGKTIVFVGDTDRSYRVKLFLEQFGIKSCVLNSELPLASRLHIVEEFNKNIYNILIASDETEILGLRKDDGTSRPRKKSKTEKKAADTDSGVSRGIDFLNVSCVLNFDFPSSYKSYFHRIGRTARAGKSGTAISFIIPKDKYRKHKPTTFAACENDEEILDKVEKHQTDGQKLENYNFDMKRLEPFRYRFGDALRSVTRIAIREARIKEIRMELSKSQKLSRYFEENPEALAHLRHDQTLNHPARIQPHLKHIPDYLLPGGRKPEDVGFVGLNMPKPGGRKFVKGGGRRKVVRGKNGKVDPLKTFNARGKGKK
>Arab_Me14_ctg01_-_Arab_Me14_ctg01g502t1
MASNGTWQWDGRYQKFYLFVGNDANGNPVYEWADTVPQPSNAQLPSGNTTQAQPGYEQSRARSDSVVIDPNMIPGASEHVRTQLYFTGTPERGWYELDSSYRMRTRAEAHRFFQKGRVLAMLYAETQSETSARNYRNGTDNTAITVGRFGQGVFSQIRRFVIVKVKRAEHFFYACAITTYGRRGVTKPGCNAADHSVVYLNGKLPIMYSGEAEQGLVKDPIMIMPTDANEAMDPSSRLRYGKMYPIEWNVKFRDVGMVSPRDRTKLMRYFKESQQAGFDSDTDDDTEDGADEPQPYRQASSQYSYSHGPHSGHGHY
>Arab_Me14_ctg01_-_Arab_Me14_ctg01g503t1
MPVSSSIPSALAGYKANTQTSFSSDLNARQVQTRLKSLIRRQEDLQETREEALINREVLSESRQHMREQRARTAKVEVTLMNAFRQHYNQISQSIPERLAVAYRAVDEERNKLGYLEDEYLQAEEEQGALEWNFMDLESDLYQYGLRDIFPESNLEGHSVPALEDHIPAPRLPKPMSPSTAIQYQVLTKELEGLVQRFMKLRQQISDRLISATNLSVEDADLIDLGSIEFVQSFLDLLDQITNAEVRVQHLKATMIQHGTEPVATTRSFSEPTILSRDRISLKMVSHTRSDGSLSQLEDSNFIVHHIRDWLVECLRENVVQRVQYLSTLHKALNFVESLLPDVAQWETLVRQHWASNEMEHLVQSVSVTPSAFEGHDLSLQDNDSNSALHASRSDEAYATQNSQTIGLGLDNTALLRGLTSPSASWTECSIPPSIDLTNDETLDIGVEAGHRTPADIFNASQVSATDILMARCDSAHDSGAAKFSRTASPPTSLKVVDERSQPRVSEVADLVHTDLEAVNAAIMTPGVTYSHWTWSVELKREFCYGFSLDDTVIEVLWLENTISNDMDRLVVSDAQSHAS
>Arab_Me14_ctg01_-_Arab_Me14_ctg01g504t1
MAGTIQPNDTNMANTGTLPFSSIPDLDPPLTLKKPTAPRSPRIDVEPLYSAVKGAISDADWTTYKTSLTQFFLGNLNQEELSFKLGKILNTAALEHAHNTLIAAIYANIWRDAPEPGIASWVSSTDKPSSSTVKGQGDESEKRLKYEVMQLSRRERKRLKTIPAAETGVQDAIGGGAGTGALGLVNELAEMRRGKQPEIGPVGPTGGYKTSTSILNILLLHVCSIDLETLDPRSLGSVILTTRTDWDLEIRKRYTAPLFSETHEFPTSLSISARLLPTCYEFGLPQGHTPECPDLMNLATETYIKEALASFLGKVAVNGVGYVRTGAFKKRVEREENAVERGEAVRDGKGELPVESEERRKRKQLCMEDLRLALQLGDGYLGQTPILAGNITNSTFLDVPGIEDIYPLPQKQKKKERANGIVNGIEQDKSGLAKWLGDGITVDFKDSVEGDKMQVDGEDEMATWMGGSVRDVGELDSALDDVLNLGDL
>Arab_Me14_ctg01_-_Arab_Me14_ctg01g505t1
MTVNGEVKSQAIDRDVLRRGLVTSSTKLRIESLGRLEHQVADESLVPADLQALLATLFETYPLYDDRESRRAVEAVLKSLVNGPHGDLVLPVIVKFLKEECQKKGIAHVNAFVLVDWCSTLLVQFAKQPERWSKFGLDLALADARVLETCVAAGSDRRATRISHSALVVTRRALRAILGSKEIGKDALDKLVANLTAKGAAPAAGNAVFLGVIAGVSSRLSDVKLRFEQHKQEYYAFYVREIVGSRSQLPDHISNAFHDFFDTFPTLEELRKEVITPIEKALLRAPEVVLNDIVSPMILALPESMDLSDVFISNLLKPLLSNVKSSNPVIRAGALRTFTALASRSQNEDVIGKVADEVLNPLKQGKVSGVEQKVLHAQMLSAFKESSALSHKIPAGIAPVALKEPGESAVVAEVSTMAKHLTFGLTNGVALDKTVADAFIKGMADKRIPVRRLWAIRAADIWWNLTESQHGQADILAFCQSTLPKLVEIWQEVNANPLPATQNGLVTVGHYVTALLLKIRDTKDEKLAAVYKKSDVLSQSLVSQPKPSFLLNAKVYTKLSTEDDVAIALRALRAVAPFVIQESVSGDVQDAWAQAFIFFIAGQSVSSRAKSAARLALTQTYLEVSTEKISEIVIQGAWSWYRLSTQEDKESAAFASKTGATELGAVLGCICLPPDVVKKLEGSVDQNQLRKQAISLLVLARGELIPRTSWIDMCLRMGVDPGQLVQENLQECMSLINAATENKDNNQLASISLAAYSAYTDLAFVAPESALPIIVKQFSQDLDPKQLESVGPQEAAIFRTPEGTAYVDVLSKKAPVTIDKNTKDYDTLKWEEELRSQLAQKQGKAKKLTSEEQAKVNAQLAKESAIRREVASTEQKMRRGVGIIQSLATGPPTEAEQWMGPAVDLLIHSIRAGAGLLLGDLPATTFIACSQRVSNRLGAIRPFVGVATLRTIGSIQLSDEYEGEQLGDLVTRVLYRLRFLSEQRPLDPVSVAYCLPLIFLVLEKGGIGKSSPEEADEQLILAFEFLSFHANSCTDTRLPRKDMLEVLIWSMQSYQQHYKIIKDCLTDLARGLAVNITNEELGALLRGTIVPETAVRTATLQAIDAELDMNDLKFSEEIFIASHDDDEENVELAKTIWDDNELQLSADAGAKMLPYLESLDKQLRRAAARSIGETVAEFPEIFDDLLQRLQESYIEKAKPRVAERDEYGMPRRNDTRDPWEARDGIALAYKEMTPGFKPDGLSDFLTFMVYNGPLGDRSAAVREQMIEAATSIITNKAKSKVEHLMELFENALESPDRKSEMYDQVNEAVIILYGALGRHLGAGDKRVPKVVQRLLATLSVPSETVQYAVAQCLPPLVRTSEQETSKYVDQMIEQLLQSKKYPARRGAAYGLAGIVQGKGLGILREYRVMSTLNAAVENKKDPNARQGAFLAYELMSLILGRLFEPYVIQLVPQLLVGFGDTTADVRDACLDAAKTCFSTLSSYGVKQILPILLDGLDEQQWRSKKGACDSLGAMAYLDPNQLALSLPDIIPPLTTVLTDSHKEVRSSANRSLKRFGEVISNPEIKSVVDILLKALSDPTKHTDDALDSLIKIQFAHFLDAPSLALVVRILERGLGDRSATKRKSAQIIGSLAYLTERKDLIAHLPILVAGLRVAIVDPVPTTRATASKALGSLMEKLGEDALPDLIPSLMATLKSDTGAGDRLGSAQALSEVLAGLGTGRLEETLPSILQNVSSNKPSVREGFMSLFIYLPACFGNSFANYLSKIIPPILGGLADDVESIRETALRAGRLLVKNFATKAIDLLLPELERGLADDSHRIRLSSVELVGDLLFNLTGISGKEGEDVEEGAKEAGQSLLEVLGEEKRNKVLSALYICRCDTSGLVRTASINVWKALVASPRTLRELIPTLTQFIIRRLASSNMEQKVIAGNALGELMRKSGDGVLATLLPTLEAGLHTTDTDAKQGICIALRELISAAAPEQLEDYEKTLIQVVRTALVDSDEDVRDAAAEAFDALQQIFGKKAVDQVLPYLLNLLRSGDDAQNALSALLTLLTDQARSNIILPNLLPTLLTSPMSGFNARAIASLAEVASSAMTRRLPTILNTIMDNVITCKDEALRSDLESSFDKVLLSVDEYDGLNTAMSVMLALSKHNDERRRARADMHLVKFFAETDVDFSRYYPDLIRALLISFDDGDKEVVKSAWTALSTLTSKRLRKEEMESLVISTRQTLSQVGVAGANLPGFSLPKGISAILPIFLQGLMNGSVDQRTQAALAISDIIDRTDAKALQPFVTQITGPLIRVVTERSTEVKAAILLTLNNLLEKIPTFLKPFLPQLQRTFAKSLADTSSDLLRARAAKALGTLIKLTPRVDPLIAELVTGSKTSDEAVKLAMLKALFEVVSKAGKNMSEASRNAILGLIDNELDDSDDSMAITNARLLGALISCLPEESAASLIKTRVLTTHFSKASLLALNAILLDAPEALTGSFADETLHVICQGIAHNQPVISDNSVLAAGKYLLSERTTKTFEHTKPIFEALAPVVEPGHPVDTRRLALVVLRTVAREHNELVRPHIPLLVPVVFASVRDPVIPVKLSAEAAFLTIFSVVEEESAVFDKYMADKGKSLPPAQQRSIGEYFKRIALRLANQAREKKEAEGGSGGLGLSSDEVEDEREIWSVGKVELGDVFGDSS
>Arab_Me14_ctg01_-_Arab_Me14_ctg01g506t1
MAKKKKPAGNPARGFATTSVASKPKVEKSAVDEAAVNKESVPTSSKDSADVAKTATPAPKVEEVAKQEAAQTPEELEAQLERDELQLLVEKHAAKVRRESRRQVTKFETDRRVLRAQSHAMTVHDWLPSEVLDTIISLAQTESNDSNRRQGQQQSLLKVMSEEDAMSKLWTLNLTLRDLGFSHEQIEPVLKWLCADAGGIDATSTVWGLQEALEWLALDQCKGHAFSYEEPKPKQSAIFTPDVSRPASPVPDTSAVKTNSASAFDRASNKAPAPGPPTLADSDHGDVHVSDIDSDIDLEELVPTYLKIKSKLYEIDPELVEASPRKKGPKGKKAAPVKTVQSPQVRKLLSQLQQLESDTLFDDREAEAQWPTKRNEIAQNQAAKRQQETTPSKSARKQQELEAPAVPAPMEEPQTATNGSAADDIMAEADMLGDMFSAIPDEPAANETLSENAESGNVVLRDFGKQSGLTPRRCLEEAIRSRDPGARVAYKMISPTTYRCRHAVTITWSKDLEVEYDIDIAGVAVSLKGIQAVFEATTIAAVGIEQSESFISTVALFSISAASSKEEKVYLRLPPNWRDVYREFLEHRKERIDADDREAVKYYRTIVQDQIDNEESDGVVLTNRWKARNQAGTGSSLANSGYNTPIPEKQGLRELWAQKAAAPTYQHMLVGRMNLPVYGFRESILSTIEKSQVTIICGETGCGKSTQIPSFILEHQLSQGKTCKVYCTEPRRISAISLAQRVSEELGEGPKDLGSMRSLVGYAIRLESKTSAQTRLVYATVGVVLRMLEGPKGLGEVTHLVIDEVHERSIDTDFLLIILRTLMDRRPELKVILMSATVDAARFSRYLNDAPILNVPGRTFPVQTQYLEDAIELTHYAGSAEDARKTGNSSGDDDEEITSEKSGIPSKLPGYSPATRNVLSTYDEYAIDYDLIVRLIEAVAYDPQLSRYSSAVLVFLPGLAEIRQLNDMLASHQSFNSNWLIYPLHSTISSEDQQAAFLLPPPGVRKIVIATNIAETGVTIPDITCVIDTGKHKEMRFDERRQLSRLTQSFIARANAKQRRGRAGRVQEGLCYHLFTKYRHDNLMMDQQTPEMLRLSLQDLVMRTKICKLGDIESTLSEALDPPSSKNIRRAIDALIEVDALTPGEDLTHLGRQIAKLPLDAHLGKLVLLASMFGCVDVAITIAAILSSKSPFLTPFGAKQRADIARLSFKTGDSDLLTTYNAYKAWRTVCTTAGRSEMQFCHKNFLSPQNLGNIEDLKAQLLSSLVETGFVQMSLDERRALSRYRSTTRHRLFVTVPSQYDHHSSNDLLVNSVIATAFYPKLLTREGKGWRNISNNQTVSLAPTSVNKGTKTAKFLSYYHIMQSSNKFYNAHSTSIAHPLPMVLMVAADMDFKLHAGVVSFPGNMVKFTVREWRAAVALKVLRRRVKEILSASWRNPGRVLGEREREWLGIFERVFVERWEKDERIRERAGGKAK
>Arab_Me14_ctg01_-_Arab_Me14_ctg01g507t1
MANNPNLQPHHSLPARPPPTTYSAPPSRPTNAGARTQPSSAMFAAFTPRSVVAHAPPQVSAAPAMYPQATVSAPYQASAYPTSNTYNSYSYPAYAAGAPAASYPSAAATMNRDAGGTYDPEEEARMAEWNSAYNRDDTNAKKTGNANVGIAQASPPDADAGPTADGKKKTVVREGGGKHWEDETLLEWNPLHPRLFIGNLAGEVTDDSLLKAFSKYPSLSKARVVRDKRSTKSKSYGFVSFADTDDYFRAAKEMNGKYIGSHPVLIKRATSEVKVVTKRDDKHGKHGQNNKNKNKNNGGNKTNTATAAPAMTATLPFIPRGVQKKGKHSGPRVLG
>Arab_Me14_ctg01_-_Arab_Me14_ctg01g508t1
MSEAVGDFGLIGLAVMGQNLILNAADHGFTVVAFNRTVAKVDRFLNDEAKGKSIVGAHSIKEFCAKLKKPRRMMMLVMAGKPVDDFIELLLNEGGIEEGDIIIDGGNSHYPDTNRRTKYLAQKGIRFVGTGVSGGEEGARYGPSIMPGGNEEAWPYIKDVLQSISAKSDGEACCQWVGDEGAGHYVKMVHNGIEYGDMQLICEAYDIMKRGLGLSNKEIGDVFAKWNGGVLDSFLIEITRDIMYKNDDDGVAIVEKIMDSAGQKGTGKWTAINALDLGMPVTLIGEAVFARCLSSLKSERGRAAGLLDGPSPSFSGDRQAFIDNLEQALYASKIISYAQGFMLIQNAAKEYNWKLNKPEIALMWRGGCIIRSVFLKDITKAYRANPDLENLLFDDFFNKAIHKAQSGWRDVVSKGALWGIPTPAFSTALSFYDGYRAKDLPANLLQAQRDYFGAHTFRIKPEYANEQYKEGQDIHVNWTGRGGNVSASTYNA
>Arab_Me14_ctg01_-_Arab_Me14_ctg01g509t1
MADNKRQSMAGKVATPTLKAGSSKDVGDADSNLYKAVGSRIKITCAPNDNVLEGTLFTACNTTNAIAINTAPAPPNPSASLATQPGDYHIIPFAHILSFELVGRATESNAGFDGAIPSIAKVDMAALIAREEQTIREMKKKDAQKGKGVSREAQEIYDTISRTLPTRWADSQIVVNDAVLVQPPYTLDSIRAPAGKEQSAAQVKKIIERYYQQKRATDGATKAPITTPIAPRKGG
>Arab_Me14_ctg01_-_Arab_Me14_ctg01g510t1
MVTELKKLELVGTVGTDVEFGTVNNGRMPESLRNLSKEIAALNRKLVRKIDLIVLPVIDILYILNYIDRQNLAAAKLQGIMEDLNMTTQQFATAISILFVGYLPFQIPSNLIIAKVSRPGLYICAAVVIWGSISAATAAVKTYGQLLAVRAVLGAAEAVFSLGAIYHLSAWYNKTELGKRIAALYIAQQFGNAFGGLFAAAVFKLDRSHGIRAWQWLFTIEGSATVVIGSICAFLMPEFPHNSKTFSPIQYDLAVWRIESESGAAEGTEDESVLKGSKMEIAAAKVDAHPINVPNAV
>Arab_Me14_ctg01_-_Arab_Me14_ctg01g511t1
MAPDVSMEDGTSLSPAPHTVEKPTAIPNVDEVVFGSLLIRPWYPSFYPEELVGRKVERLYVCQWCFKYAKELTGFIKHLRACPLRSTEPPGNHVYTSNGYSLYEIDGEKNKLYAQNLCLFAKLFLDTKSVFYDVTTFLYYLLVAHDPTPNIPNTQLDGDAPVGQNQVVGFFSKEKMSWDNNNLACILVFPPWQKQGLGQILMGASYEMSKREGRLGGPEKPLSDLGHLAYVHYWSQTLARTLLSSPSKKTLTVHDLGQRTFIVPDDIIATLQAMDVLEHKKRGGAEALINKAKVRAWVEQHKVSLKSPVDSEAFSLRERSRSESEE
>Arab_Me14_ctg01_-_Arab_Me14_ctg01g512t1
MQSEHRKIELQAPGDLIHLTSQIRAAARSKLDLHLPAQPSDAHSPDDLRAATETLVDAFVAQVLAGLKSNITINGIDVVSAAGGGGFGIDGHDGHDGHDGHAGHADAMDGVQQSAAVPGVEEVEFEPFDDKLRARLAEHVARRDRLVADISRHRRETAAASARRFEEVFESEARLWDAQSRVAEDKAGGVALELLEGGRAVGIAREDEVRRNWERAVEGLGRLNKGLPETRARLERCGDVVGYLAADKK
>Arab_Me14_ctg01_-_Arab_Me14_ctg01g513t1
MSSSIAIPKRKSKALERATESGSVGSSASSPSSYQPSSYGSFEAPSPRQGSKARRPSLMSATFSKAEHTVVNVGDAEYPRLITCVKASQGFDWNQEMFLPSYADFQFDDLERRQDPVQDIVVTDEEVKNMFPTS
>Arab_Me14_ctg01_-_Arab_Me14_ctg01g514t1
MAVSMLHAPSRASTSSTTSSFVPVSRQNTMSSHDGSRSVRQSKRYSVTALYLSMSAKDKELEIEDDLARAQKILRELKTKISSQSKKNFVLEKDVRYLDSRIALLIQNRMALEEQNEVASHLEDGLELQEGSFPNDEKTQKYGNLLFLLQSEPRHIAHLCRLVSMAEIDALLQTVMFTIYGNQYESREEHLLLTMFQSVLTYQFDNTPDYSSLLRANTPVSRMMTTYTRRGPGQSYLKVVLQDSINSLIELKDLDLEINPLKVYEKMVSELEEQGNLPPHLPKGVTAEQAAENEKVQQIIAPRLNMLMEIANNFLSTIIKGLEETPYGIRWICKQIRSLSRRKYPDAQDQTICTLIGGFFFLRFINPAIVTPRSYMLIDATPAENPKRTLTYVAKMLQNLANKPSYAKEPYMAKLQPFIHQNKDRINKFLLDLCEVQDFYETLEMDNYVALSKRDLELSITLNEVYATHQLLERHATELVSSKLARRDDAKDKVTDLLQARDDSSHLGVILQELGPAPAQLPRKENRAINLPLFSKWETPLDDLTAALDITQEEIYFMEAKGTFVMILRSLPPHTSVTRRPLRLDRIAEAAATTKNDSIMVKKGIRSMELLSQLQDLGVIDKEDGFSLLRDEVEQELVHLGSMKEKTIEETRKLEEVYRTIRDHNNYLVGQLETYKSYLHNVRSQSEGKTRKQQKHQVLGPYKFTHQQLEREGVIQKSNVPENRRANIYFNFTSPLPGTFVISLHYKGRNRGLLELDLKLDDLLEMQKDNQEDLDLEYVQFNVSKVLVLLNRRFARKKGW
>Arab_Me14_ctg01_-_Arab_Me14_ctg01g515t1
MADYEASFEATAPPARRRPSRVKSADDAAHSAPPSSTGTDDSGSKLSKTSRPTLKKTCKNHASAAPAPIYEEESAHWEDDTVGHMPNLGQIPEGHEDTRDRSRDSAVSSAVEPHARRRRHSEDSSSSRLRVRPKHGSLQRRAGSLAKHSNPSLASVLSGLTQPSTASESNTTITEKSHRHERRRKEKSSKGSKAQRRKRAEAPSVADTEATQSDVFQFLSQDAGGQDSQLDAQSVLQASSPSVTSSADSRDKDSKSSDASEGAHDTPRTSPTSTRRSYSQGAPYYGHYQQPSGKPLYQSSFVHGPGDEEAEDSEVYSDEESTYDASHMPHPSQPAPHWNYPPNSQPGNAHATHLRQQQHRFAGHVLQSPQPHHNVPYAGVLSPNVQPAVPFHDPRMYSGASPTDFSATASQASAWPPMASYPPPLAIGYSPESVAAYPHHSPVASHNVPMTVQSPMVAHADASHHLAMVPQPHSQRQGSVADDTVIGYELLAYKLSELKKEGRSNQEDTVVPAYRKFEQLNHRVLLHLQDEISELEEELRLLDHDIAQASPGGQTGHHHPASRRGDSLHGNDVHRRRIDVLGRVYQKLEQYNRALSAFNDVKSLPSASRSDVDRYRAWMKQRNPIHEAESRFLERQTDLVAFSPRREASIGHGAGTSQHAAMWLPLLPFVAFSVVPSLLGRIIVIALISAAGLKRVTSTPELTAILTIREWMYATWMQAWPAPGREAVAALRWCLSAMLLPGPVP
>Arab_Me14_ctg01_-_Arab_Me14_ctg01g516t1
MDPTVKYLLSLGAIRDRAKVVGQAAKNGNLNHFDVHEDKLDDVADFVTSVIKRDYGPDKFDTIPPHGRWQHFEVGNVPRISDLLEEWKKSGCDDKELTRRLIDLFFVSVLLDAGAGDHWKYIEPKTGGSYERSEGIAVASLYMFLEGGYTAEETDTPLVDGKGLAQLTTETLAKGLQVTESNPMLGVESRANLLRGLGKSLLAHPDIFGAAGRPGNAVGESVRLHSIVPAHHFPDYLLESASDPATLDILVFWDLLQTLLIPIWPQDRTTINGSPIGDAWPLGALANQAGSSHTDKSNPEFIQPFHKLTQWLTYSLMVPFQRILNIKWINAQSLTALPEYRNGGLFVDMGVLSLKKPTLDKGLKASREALPQFAAGDDVIVEWRAMTLVLIDKLYPMILSRMDGAHLSMAQLLEAGTWKSGRETAAKLRPKTKSSPIIIESDGTVF
>Arab_Me14_ctg01_-_Arab_Me14_ctg01g517t1
MESYVYEPIDLANASFRLVRPYQDDTGPIRCELFHAQIHDAKDAIEYEALSYTWGGTIKSCNIELNGKNMPVTERLFHALQHLRYTHEDWIFWIDAICLDQQNISERGHQVQQMAPIYGFARQVVFWLGLATPNTDQIFASMQILE
>Arab_Me14_ctg01_-_Arab_Me14_ctg01g518t1
MAHQHGHAHLIRRQRNRQEEEDDDPVATVIQIVTVPNTPTSKAVRVTQQNDAPKTLVPPAVATRPFSTVSDDDDDEKPTSTRPTAASSKRPASTTIHTTESETETAETSTAKSTKGQSTLIVATKSPVASNSASVVGALVSATASATASISATPTSDASESGGMSGGAKAGLALGILLGLAALLAGILFFYRCKKNAMAGEKDNEKIGMHGAPAPLPPQVPTGAAPSMDTNRTMSTAPRLSLRPVTQFDPTFNEQRKSGGLLTVAAAAAPIAASQDRAVSPEERPVSAWERRGAANAAPAAAVAPAANPFNDPQTPANTQPPANPFGNSAALDAAHAAIPDSPPQAFPTHSAAPSADLDARVAPAPAPEVDAVAVANAVTNVPVSGTEFPAPPSLNANTDGVPTSPAWTEDVPSSPAMGTPMIVGTAGAMVAGRPNGAPAGPNNVHRVQLDFKPSMGDELELKAGSLVRMLHEYDDGWALCISMDLSHQGVVPRTCLSKHPVKPRTGPPRQGPPPPHMRGPPIRSPMGPGGIPQPRPMSPVDGRSSPHPPALSPASGQDPPGPRTMSPGPRQMPPHMQGPPRNRTNSNAPYPGSPQGRGRANSNAPYAGPPRSMSPGPHGGGPMAPPPQMGRPRSSSASQLGGARRGPALGPSPMNPNMNLDAGPAPAPLTSAVPSRKPVPGMAL
>Arab_Me14_ctg01_-_Arab_Me14_ctg01g519t1
MSSSTTEKVADKLPSKEELKEDVKKATKSSVQSLRALVAGGVGGVFAVVVGHPFDLVKVRMQTAEKGVYNGAMDVLRKGIAKDGLVRGLYAGVSAPLVGVTPMFAVSFWGYDLGKQLVTSVSTVENGQFSVAQVSAAGFFSAIPQTLITAPFERVKVLLQIQGQKNLAPGEKHKYNGGVDVVRQLYKEGGIRSVYRGSAMTLARDGPGSAFYFATYETVKRKLTPKDPVTGLPGQLSMPAVMAAGGAAGIAMWIPVFPIDTIKSRLQSAEGRPTISGTIKGIYANGGYKAFFPGIGPAMARAVPANAATFAGVELAQKAMRKMFDKDGD
>Arab_Me14_ctg01_-_Arab_Me14_ctg01g520t1
MDETKPKVSLLKQHPALPLLPLSSGPPSATQTLIVNYPAARLSSSPASSPNIVEPSIERKGSVHPTLGNSMERGVSPGVDFFDDQSSGSEWEDADDEDRTQTLSEDGEVGLGLGSLVHSPVRQHRRSRGRSRERSGLTALPAFNQKHSHGPLDGFGNTHENAGPNKARHVSLTRMEKVNVRVVHNHGSNASTPRGSVMSNRSEDTVTHIPETTKPYSIDARGEAAFLPEYHHGHHRRNTSDSVIADSIINAHLTTMQALKALSPSSSVPEVSGHSFYSATSIEPPKARSFSDARHIKLSPISVKDRDHLPSHFVKTPYPFTAKKEFPKPATRPRHRNADGRLDSGYGGDSGYGGEGSRNEYSNFKGKHVVALMSNDGAYDLHSRLDRNVDARGIFPTQDSHSETHCSETVLHLSLQKHQKMASRERAKILIPSDLSTTSPDRRHAIEFDDKYLAERLRQTHSELAGSWAKRHLSARKMRYIRLSQNSAWSDIPSAPTHQDGGTSRLLASGAGTGAGEDSRPFTEEKLMHLYKHPRTGKARYTWVHWARRVAISNTTAPSRPHTSSSSHQQYSILESERDEDKEGSVIHHHIAPPSDTITTVQFVHTLSTLRILVALALILVTSALASLLWIFLGVNGGWLSDITKQRADRVGGGMAVGVLVLLLELLGFGAWVWRS
>Arab_Me14_ctg01_-_Arab_Me14_ctg01g521t1
MSEPEDQPQQLINGTLKPLIGMDSKSTIPVIKSKAEYLKAVMYEGISFLSLPTAQVTILEGTATWCQQCKVIAPEVAKLVEEYPDVKFYLYDVEECEDIAHELGVRSMPTFSIFKDGDIQDGVTGAKPKEIRKAIEACL
>Arab_Me14_ctg01_-_Arab_Me14_ctg01g522t1
MADTNPPAQPAAAAESAENLHTDPVTGEKISKSELKRRQKQREVEKKKAEKAEKNANLPERPKKEGKKEEVELNPNQYFEIRSNRINALRASKDPNPYPHKFHTNTRIHEFVEQHKGLTRGEELKDGPEIRIGLRVMAIRSSSSSLRFYVGKAEGVTIQVMCQLQNAKGDVPFEKQHENIQRGDIIGVVGYAGRTAPKKGGDGELSVFAQEVILLTPCLRMLPTEHFGYKDQEQRHRNRFLDLIMNDSTRETFITRSKIVKYIRQYLDERDFLEVQTPMMNKIAGGATARPFKTHHNELDMELFLRIAPELYLKELVVGGLDRVYEIGRQFRNEGIDLTHNPEFTTVEFYMAYADYEDVLQMTEELVSELVFKVKGSYETVYHTQSGEEYKVNWARPWRRVNMIPALEEATGEKFPPSNELHTTETNEFLKKVLQKMKVQCSEPRTNARMIDKLVGEYIEETAINPTFIVGHPEVMSPLAKYHRDSPGLCERFEAFVCKKEICNAYTELNDPFDQRLRFEEQANQKDQGDDEAQLIDETFCQALEFGLPPTGGWGLGVDRLVMFLTDHYSIKEVLTFPFMKDVEDTKKTAAEVVDVTPKAEEGIFHK
>Arab_Me14_ctg01_-_Arab_Me14_ctg01g523t1
MGNQISQMFPPTAAFTESSLPSGSLKDKVYIVTGASAGVGKELARLLYSLNSTVYLAARSKERANAAIEWIQTSHPDSKGRLEFLHLELADLESIKPAAEEFLSKEKRLDVLFNNAGVMVPPQGSKTKQGYELQLGTNCLGHYAFTKLLTPLLAQTAKSSEAGSVRVVWVSSSAAHLGSPTGGVDLENLDYHRDKFAFHKYAVSKGGNVLHALEMRRLHEQDGIISVSLNPGNLNSELQRHSGWLGGLVISLITYPAVNGAYTEFFAGLAPDVKSIKQNEWVIPFGRITPLRTDLAEAGREGGKAGEFWRWSEEQVKSYL
>Arab_Me14_ctg01_-_Arab_Me14_ctg01g524t1
MATARRPEKPSAVPANPIPSSSPAFGTPVHPIHPRRTAPIRAPPALAPKAKSTVLPILLPPATLRPLAFRTFTKKHNLTLTSSALQALATFIGKHCGSGWREEGLAEKVLEEVAKSWKKCGGQVIVDGDTDVFKGILRTLEGAMEGGRVAQASTLGRQSSFSFGAEHKGVSPWPALDATSSFGMSTLHVQDKDEEEEMLRDPREWIKVIGAFEQPKQVYNVSQRHFEKSASKPSLFPHPAHKTDLFRQRYHIVHQRILRNETFQAPTFSTARSATLNRTGSIATSQTNTITPIANLLGRTGSTHLLLGMLVVSPTGALSLSDLTGTIALDIQHARPIPENGAYFAPGMIVLVDGSYEEDHGAASSNLGGTGGIGGTIGGKFLAFSLGHPPCERRTATLGGTDELDKSSLQGPAFGWTDFLGVGSQRATGSRMNRIASNLLPSTAPHNIIIASDLHLDTPSTLSALRTLLRTYSPSPSNPNPTYPLAIVLMGNFSSKATLAGVPGAGSIEYKEHFDALASVLSDFQPLIAHTSLVFVPGDNDAWPSAFSAGAATPLPRKPVPALFTNRIRRVVAEANREVWGSGRARGKEGEVLWTSNPSRLTWFGVKGEMAILRDDLAGRLQRTAIRFPKNHDGDDGDGDGDTEMPFAPQHDLNEAMHMDLPAPQTLQPHPEPPVDTATQTARALTRTILSQSHLSPFPLGARPLHWDFAHTLGLYPLPTCLVLADPGAPAFVVKYCGCSVLNPGTVDASRGRAGREGRARWVEFDIRSSVGIVRAEG
>Arab_Me14_ctg01_-_Arab_Me14_ctg01g525t1
MAEPTDAPLATVAEAEELPKTKEKLDELTQAASLQYSLKNFSAAADHYADAVEIQAELNGEMAPENAELLFYYGRALYKVAVAKSDVLGNKVAQEDQKKKKAKRGVKAEASSSAASGAKTEPPEETTASKPYFQLTGDENWDDSDDDDDEDGDGEGEQDEEEDDFGNAYETFELARVLYQKQLDAQPDASPAEKGKGPATLSPTSRAIKEKLADCHGFLVDISLENERFHDAVADARSSLALQEELNPFEHENVTESHYSLSLALEFASVSKIREDQLAAERQQDSTSPSTTSPAATSDTDGINWPLRKEAAHHTELAIASLRARLSKEEAALAHPTLTAAQKSEKTAIIADKKAMLEELVGRLHDLQRDPTQQHDYDALDPSVVQGLFGSLLGADPAVQKAKLAEATSAANDVTAVVRKKAKPATTTATAIQSNKGAKDKRAAAAEEVPAQPKGKGKRALEVASDEASEAKRSRTAELA
>Arab_Me14_ctg01_-_Arab_Me14_ctg01g526t1
MAVLQPNAHPGSPAPGAGQRDLFAGAQTTDTAPRRADDQRRLRRVKDSKEQLKRRNQARGTSNGTIDTSTSNSTSAGRSYTVANVHNGVIYLRPVVRAGNQRNLPQPDPFIFPPQTPPDSATLDTKLRPTSNEWEQSLYGSRTPRSEPTPPLPPDLLTEYEARQQAHAQHPSTSRPIAHPRAHSFSTLDGHTTTSATTEPGTFKVVIERPPFGARPKTADTSSLPLLQVPIPHYRLGTPRFSTKGTVDLRSSTYTRTSATDEFRNSLLTPQRVASHSFLSSRPQSDAFSPVPARYRATMDRPPLPASAPSSSRVSHAPIGPRLYDALTANPDDRAVVKFSPSGEILAATPSRLVAHITSPSFLDYELLSDFFLTFRAFLSTRDLVAYLIARLRWAVDRQDDFGRIVRVRTFVALRHWILNYFVDDFVPSHHLRTYFCNLVNGLYRDLKTRADGGAGDVKIVGELKKCWRRTCVLYWETEEGLGKDFADEELLPGGLVELPATYEEPEELATRPATPRRVDRDTKETMGSNPSDQFASRHMDWAQRARHTPQNSLSSPYVPSNEAETVQAPLSPSSEGSMHVLSCSLPRRGFLKSEQAMDLPLYPHPVPHPSTAPARLATSPQQPVSNKNTRPSHTHKRSGSFSDALRDSRAPLSIPKNASVDVTISAVTSMPGSLVRGGLFQPSSPYVELKGTSLRHTRSRSETDGDDMYADDLQLRPGHANSPGMKKILGSMRRALSIKQSPHSSPQLGPHVHQRMVPPMRCSNPGTLSTTSGGVRKQRTIRTRPEIRIDALASKVVESFKEAVEQQLREEDQRRESSVEPPDLGGFEFEFENRKASSTGEDDKLSRSPDPRVYSNITTGSKSILIIDDTGPPPLPVMSEALPSAASDETRITSTPPKSLQRNPSIAQRLAEGGMVAVRHSDLYKDPTPTVSVEERRMSRSSTQQSQAPQRRSTSEGRGQMHSFQRRDSMRKSLARYSLRRHVSYNSILSRHRQGPESVATFMTMSSDNDPFFLERQAPQAPHGPGRMLRRKPGGDLRAAGNIQDLEMTPRPHSTGSISNRTHSIANSVILRSDRYAAPAPDASQPAEAVDETVVVRKPISLVETHSSQPNLRPSFEAEVAKLAALPDDTDDEGGVEAALMKLEGRYEKKSPRESSVRAPVVQPEVYWPTGAPGDLTIPPYKPKKTEELGGADDSLHRPLATPGAEGQNMYHLSGENFNRRVPAVVSTAAESEDSYSSVPLLDRDLSDVIAAGRTQTFDTMRSSAKPSPLQLTDNTTAQTTASATNPTSANPSLEYAVETDSVKRIRSGNTLPSSTAIRQSFLLDEDEELSDIASTTTVARSDEASHGVRTFFEDEPAAIDRASDNFPTHPMRHPPTPPSTADRLKEAAPSTTWDRGLPTPGLTPTASRPDQSNQHTPDQHIKLHESQFKQPVSTAHLPFILAYDAELIAQQFTVVEKDALDEIDWKELVELRWKQSSPQIRDWVHYLRTQEARGVDVVIARFNLVVKWAVSECVLTENIEERARCIIKYIHIASHARRLRNYATMYQIAIALISNDVARLHKTWALVPTAEKQTMKELEALVQPLRNFHNLRLEMETATVEDGCIPFIGIYTRDLIYNAQKPPFIDAPPVDGERLVNFERHHTAATIVKNLLRLLEASSRYSFRVDPDLISKCLWLAALSDDELAKRSRQCE
>Arab_Me14_ctg01_-_Arab_Me14_ctg01g527t1
MFIALVLSLLAATALYRGFTLYRSWQSNIAIAKSSGLPVVAIPWNVFGVFWLATFYIWIPILEVILPASWRGLWFDLLDPEWGHRKGHAPFEKLGKDVFIIASATRLSAFVADAEAVTQITTRRNDFPKPLKMYGALDIYGRNLVSSEGSDWRMHRKLTAPSFGEKNNELVFNESLHHARSLLGLWTGPEGQGNETVEDPAVATMSFALFVISSAGFDVRVKWPHEDETRALSVETDESKSMLVGSEKPAGHNMSYREAISELLHNIMWTQIIPPKYLHLSPIKVHRKVGAAVTEWGQYMDELYERKKQQVTSGDSNNPGMDLFDALIRGSGIIDGKRNIQKSDLLGNAFVLMLAGHETTANTLHFSLLFLAMHRDSQKRLQQDIDKVLQGKPVEQWTYEEHFPKLFNGMAAAVMNETLRIIQPVLNIPKSTPPGRPQNFTMGDQTYTMPGDTHVFLSSAIHRNPKYWPAPSTEPSENEMRDVDTFRPERWLAASKLEDSFIDIGYDEEELRGPSGEDTSAALFKPVKGSYIPFSDGFRSCIGRRFAQVEILAVLAVIFSQYTVELAVDEFASDEEVETMNSLGREAVYAKAAARADHLLKTEVATIITLQLRGTSVPIRLVRRGEERFGI
>Arab_Me14_ctg01_-_Arab_Me14_ctg01g528t1
MADPDAPAQKRPRLDSVNPPLYNHNGHGFPHPPPPPPHTQHTRQSSHPTPAHAAPSPISRHYPAHGLPHPSHSYPPSGQAPHPGPQPSPSLPRSDIRAYSDPRTIPSPSQRPHGLVGPPPAVNISQDNISTYRPPPTPQSATVPEPQSSRSSASADVKPQPPPMDHGGHQSPWGMNPEHRPNGHMSNGYSHSISPTHHNVGQPFHPPPLQAPQYDQGSYAQSPYMGQYAGAAGQQVRRKQCDEARPCQFCRENNFDCQYKDVPPPKQDRSMMQLQDSVNDIGEVLKNLVGEFTSWRQSVETRLPLARGPEHISSVASPEAAFAAPNRDQNSSRFPTPAQGRNQMRRISSMKMESPNVSHSQMSPVAAQAMTPVKQESMFAPPQQPATPADSVRSEHSGATGLPPKEKSGLQSDHTTPAHKLFEEWQSMTPFCRNVDYIEKLIDGGHDVSEYPMLLEQDRGLLRVWGVGEGQDLNDGAQGPGTPDSGGDVDASSPAPGKEGLWGHPPADTSSPGTASGEIPSSHPRPENNGGLGPDGRPDFRSSVLWELYDSYIENIHKLHPFMNASKLRRMIKDFSEQYSPDMHSKHAGSPAANTLANHQLSQNLKRKRSGSAYGEPCSAKGAIERSLRNALVLLVLALGKVCAHHDPLPSPQSDKASHTNGGWGVHANGSFNSESSDDNRPRNVDILPGMGYFAYATDILGNQQGGNTVAHAQAMILAALYLSQFARVLESWSWINNACRVVLVLIKADYQKLDRNWCLENKASLPPKERYRLNLVMCVYWTCLQLESDILAEMSTLPPSRISDFQSEIAYPDGVYESVPIESGTSVEEKMFADPQTQEGSMLMYSSQIWLRVILNEAHNMLYGRNARRSFDTHNIKEVAHRATAHVRILDDWRRVLPPTLAWNDEDPPATDINVARLRAKYYGSIYVILRPYLRIANHFIDFPPTGASTARASHHNSPAPTSGSSSNRNVHLLVDLSDDQRSIIGVAVKCINAAIQSTIAFDRVGAAPGSKYVKFDANARTRRLVVTNIFGTMHAQFGNMLVLAAVFKSHLCRYLPKDTQLTKQNLTLLMDRTCKVLGEIAPNSPILEMDLRILRNVRKQLDLYP
>Arab_Me14_ctg01_-_Arab_Me14_ctg01g529t1
MQEVEVEVEVEVEVEVEVEVEVEVEVEVEVEVEVEVEVEVEVEVKAEVKVEVKVEVEVEVKAEVEAEVKVEVEVEWEGIEVAVPVETRLPPAGAHPRPSSPRSPSSSSPPPPPPPRAHARQPAMRLLARAVRRPRRAQQPSAALGRRHLANNGFFRVSDEVREALHAKKAVVALETTIYTHGFPYPENVALASLLESVVRVHGGVPATIGILDGVARVGLDPEELIRLTDSAGQPTTLKLSRRDLSHVCGLRLTGKHFNGGTTIASTMLLAELAGIKIFGTGGLGGVHRGAESSMDISADLTELGRTPVAVVSSGCKSFLDIPRTLEYLETEGVGVATFADGRQGNVDFPAFWSRDSGVRSPTTIQHEAEAAAIIHAQHQMQIRSGLLFANPVPLEAAIPKADMDLVIKEALKQAEAQGASGKDNTPFVLAKIKELTKGKSIPANKALIESNVRRSAIIARELSILETKQEEARGRSSSYFTPVQAATTNATSSIPTPPVTPPPSVPHATPVDIVVAGALAVDFSCDYAPFANASSQTDPLPHTSNPAVISQSLGGVAHNIAKAAHLLGSSVRLYSAVGNDLSGRAALSQLEDEGMSTSGIETLPKPARTAQYVAVNNANKDLALAMADMSILEAIPHSLTSDLSATLFADPATKPKVLVADANWSSPALHTWLSAAHAASTTTVFEPVSTAKALRIFPPVAQSTPSSSSASPPSTYPNSLAHIITPNHHELTALHEHAHSTGLFELPSWFAVIDALGIPSTGLRVPLAMITDSALVDAGIPQQAIKLLPFFPTILTKLGPQGVLMTRLLATDAPELHTDTDRPFVLARNNNGDAASGVGGLYVRLFPVDKVLSPDEVVSVNGIGDTFCGALAVGLAGGKKVQEVVAFAQRAASLSLRSRESVSVELRGLKAEVAGL
>Arab_Me14_ctg01_-_Arab_Me14_ctg01g530t1
MRPFSLFTSAMAALSSVARAELNLSEPLRSKQLLPSTFTPPQVFKNAHLVRTSNLDKAYARETVNVLIENIDAKPQSEYYVPFDASLLAKVGGFEVRDKKKAAAGTFRAEVVGLEQGSSTEFYRVHLPEPLAPGAQQTISISYAVLSSLHPVPAELAQTAKQYLQYSFSAYAPSAYPTDKQRTKVKFPSADVTDYTTLPAELNDEGKTDPQKQGSTFTYGPYANVPAGAHQPVSVRYEFTKPVVHSTLLERDIEVSHWGGNLATEERYWLVNQGAGLKNHFSRVEWQKQSYMNPPTFALKGLNLPLAPGAVDPYFTDDIGNVSTSRFRPGNKENLLELKPRYPVFGTWKYSFRVGWNADLSTYLRKLAKADTYVLKVPFLEGPRAVEGISYGRVILRVILPEGATNVRFHTTVPIVDNTTTLHKTFMDTLGRTTLTLTAINLVDDFRDRDLLVTYDYPWAAGYRKPVVLTLGAFAVFAFIWAVGSIDTSIGKKKTA
>Arab_Me14_ctg01_-_Arab_Me14_ctg01g531t1
MSRTYGAAELHMLLPGPGSGHACLALYDVCPHTTHSSVSHARDPYVHQTLLFAPPPARSLERRDEAEGGIHTRRLSSTFSQHPLASIPTSPLARLVLSKHSPVTRSLRATAAFPPPPPPPPPAIYLLTFATDRSPSTRSFAHLLNTHLPAHIPLLYTIDARTLPVPPARLCAAYSGVAAAVQDFVLRDEGARDAVRRAVEELVRAACVDGSGGGTGGREVALAVCCTAGTHRSVAIAELVALGVRREVRRVGSKDGVKIVVRHVHRVRGVEDPY
>Arab_Me14_ctg01_-_Arab_Me14_ctg01g532t1
MASSPSMLTKFESKSSRAKGIAFHPKRPWILVSLHSSTIQLWDYRMGTLIDRFEEHDGPVRGVDFHKTQPLFVSGGDDYKIKVWSYQTRRCLFTLNGHLDYVRTVFFHHELPWILSSSDDQTIRIWNWQNRSLICTMTGHNHYTMCAQFHPKEDLIVSASLDQSVRVWDISGLRKKHSAPTSTSFEDQMARSNQNQADMFGNTDAVVKFVLEGHDRGVNWVAFHPTLPLIISAGDDRLVKLWRMSETKAWEVDTCRGHFQNASACLFHPHQDLILSVGEDKTIRVWDLNRRTSVQSFKRENDRFWVIAAHPEINLFAAGHDNGVMVFKLERERPASAVYQNNLFYITKEKHIRSYDFQKNLESPSMLSLKKLGSPWTPPRTISYNPAERSILVTSPADSGTYELISLPRDASGAVEPTDTKRGSGTSAVFVARNRFAVFNQANQQIDIKDLSNATTKTIKPPHGTTDIYFGGTGNLLLIAPTTVVLYDIQAKKNLAELAVAGVKYVVWSSDGLHVALLSKHNVTIATKNLDQVSTLHETIRIKSATWDDTGVLLYSTLNHIKYSLMNGDNGIVRTLEHTVYLVRVKGRNIYCLDRAAKPKILQIDPTEYRFKLALVKRNYDEMLNIIKTSSLVGQSIISYLQKKGYPEIALQFVQDPQTRFELAIECGNLEVAVEMAKQLDRPKLWQRLSTEALAHGNHQIVEMTYQKLRNFDKLSFLYLATGDQDKLKRMAKIAEHRGDMTARFQNALYMGDVQNRIEMFQEIDLYPLAYATAKAHGLDEQAQSILEAAGVTEDQISVPSTGNPLAPPKPIVPTFKANWPTRAASSSVFEKALAGEIEGVGEEEPAANGYGDEDLLGEPEAAGATAELGGDEDDDVGGWDMGDDGDVEAEDEFVEVEGAEAGAGSSEADLWARNSPLAADHIAAGSFETAMQLLNRQVGAVNFAPLEDRFQEIYQATRTFLPATPNTPSLVNYVRRTVAETDSRKILPIIPRDLESVLSSDLAAGKQALLKNQLPDGVAAFKRLLHLLIINVVASQAELTEAKKAIHTAAQYTLAMSIELERRALTKGATDISSLSDDDKKRALELSAYFTVPELEGAHKSLPLSAAMNFAHKNKQLNTALNFANALLDRTGNAKMKESAKRVKTVAERNPADGIEIDFDQFADFEICAASHTPIYGGSPSVACPYDGSKYHGKYKGTVCKICEVCQIGAPASGLRLVG
>Arab_Me14_ctg01_-_Arab_Me14_ctg01g533t1
MATHERPPHFERLHGCPTPPPTASSIHAPPRFLSQANHTPPPYKRMEAPKPLHTPPLEFTPIGHNQFRFTRAQSIEQSSRPSSISGHAYAGTTPQETEYEDSSEEESEDEDEDERPVRRVEKPDFELEEVDSNDSEDENIEVVQPDHCEDAKSDRSGAALEDTGVMDRLRELHVEEGSTDEEAKERIYLRKKKRWSAGVFKRTHSQSVEGDSSYSDDDPQDDNNLEARRLRRKLRGPGPWNRRASLIFEDKGFPNTNNIEEVEEPEEGMVKHTKGPPSIPSDDAFTLDELPFWRGAYDSMDVENESE
>Arab_Me14_ctg01_-_Arab_Me14_ctg01g534t1
MISITKIIVVAVAAFGSVQALPQGIAPSSTISPPAAPAPTDKQTYLFRDLFTAPTAIKRFQRLLTQDEKLLTGEDLKKLTVFSFNNGTNSTGGVTKAANIDSFPILTGLGISTTLGFLAPCGINTPHVHPRATEFLTLVEGSNLKFGYVLENNLVKAGQNPEIAGALNKFEGTVFPQGSIHFQFNDNCEAATFVAALNSEDPGTSQVAQNFFALNSGVVNATLGFPKTIDGKNIEEFRNAIPANLALDVKVCMARCKKE
>Arab_Me14_ctg01_-_Arab_Me14_ctg01g535t1
MADSIKDEIATIEKKIEELQAQLVDAKSRLQKSQNESTVSDESAKMSDQDKMDLIKVNLKEVLNPEIMEAALKEGRPLKVYWGTATTGRPHCGYFVPILKLAQFLAAGCHVKILLADIHGFLDNLKAPIELVKFRAEYYRFTITALLKAVNVPIDRLEFVLGSSYELKPDYMMDVLRLASITSEHDAKKAGAEVVKQTENAPLSGLLYPLMQALDEQYLDVDMQFGGVDQRKIFALAKDILPKIGYKERAHCMNPMVPGLQGGKMSASDPDSKIDVLDSEEVVKRKLKKAHAAPKVIEENGILSFVEYVLLPASYLRHGTPKFVVERRDAEPLEYTTIEQMHADYKADILSPQILKPAVVEALNALLAPVQQEFQNSAEWKEIEQKAYPPPPTEKKKEKKTKNKGAFHPGAAKKVEAKPDGHVEGADKAKVDVGTEGGEKAIENLTLDEKK
>Arab_Me14_ctg01_-_Arab_Me14_ctg01g536t1
MAPAAAKKQPQWSTDFDTKRRQHLFRNPPKDKTAYPTLAAAVDPHINSFNAIFAPGGQIEEGIKDIGIKSFTDGDPYAQPENIGRRNRLSVRIQDVFLDKAVLPPSNKVALKNRNILPAECRERHATYRGKLRARLEYRVNNEDWQEEVCDLGTVPIMLRSNRCHLQNMSPDQLVKAKEETEELGGYFIVNGIEKIIRMLQVNRRNYPMAIKRGAFTNRGPGYTPYGIQIRSIRTDQSSQTNALHYLSDGNVNFRFSWRKAEYLVPVMMVMKALVETNDRDIFEGIVGAAGSKGLAEKQFVTDRVELLLRTYKVYGLHSQAKTRAYLGSKFKVVLQLPDDASDDEAGVEFLRRIVLPHLGAYNVTPAQNADKFQMILFMIRKLYSLVEGECAVDNPDAVQNQEILLGGQLYGMVIKERLDEWLNSIRPVLQDWGRRSEWKSFTSPEFKKEFVPRVLKRTTMDVGRAMEYFLSTGNLVSPTGLDLQQTAGFVVVAEKINFYRFISHFRMVHRGAFFAQLKTTTVRKLLPESWGFMCPVHTPDGSPCGLLNHFAHKCKLATQNVDVSAVPKLVAQLGVSSKSSASLESSVVVQLDGRVLGFCSPKQAKIIADTLRYWKVEGTHDVPLELEIGYVPNSNGGQYPGIFMFSQVARMYRPVKYLPLGKLDYVGPFEQPYMSIACTDPEIVSGDSTHVEFDPTNIFSIIANMTPFSDFNQSPRNMYQCQMGKQSMGTPGTALRYRTDNKTYRLQTGQTPIVRPPLHNEYGFDNFPNGTNAVVAVISYTGYDMDDAMILNKSAHERGFGHGTIYKTKICDLEEGGRRNRSGKTVSKLFGFAPEGLKKASYLDTLDDDGFPRVGTLLRNGDVIAAWHTVSYDAATDDYINRDANTQFFKYKEDELAFVEEVRIIGSEDGTQPCQKISVKLRVPRSPIIGDKFSSRHGQKGVCSQKWPSIDMPFSESGIQPDVIINPHAFPSRMTIGMFVESLAGKAGAMHGIAQDSTPFRFDEQNTAVDFFGHQLMKAGYNYYGNEPMYSGITGQELAADIYIGVVYYQRLRHMVNDKYQVRTTGPVNSTTGQPIKGRKKGGGIRVGEMERDALIAHGTAFLLQDRLMNCSDYTKAAICRGCGSFLSTAPTVSEYSRKKDAGGKNMTVRCRRCARLADGHQSKSDTWTDGQGMRFSGGDDIATVAIPGVLKYLDVELASMGVRLKFNVAP
>Arab_Me14_ctg01_-_Arab_Me14_ctg01g537t1
MASIFRRIYDWLLRLFWATEMDITMIGLQNAGKTSLLRVLAGGEFTVDSIPTVGFNMKRVQKGHVTLKCWDLGGQPRFRSMWERYCRGVNAIVFIVDSADKGALPVAREELKLLLEKPALEGIPLLVLGNKSDLAGKLSVDELIDALNLKEVSHREVSCYGISAKEETNLDAVLQWLIARASK
>Arab_Me14_ctg01_-_Arab_Me14_ctg01g538t1
MLSTSPTTARLLLFAALSTQITNAMAQSRCYYDRYNVRRCYPQSAWNSWVRWVVLAVVVGGFLLLFFLCSCITARRRRKAGRTPFYGTGWAARPGNSNAQPYYNNQTQAPAPPYSAATNNNNGYYGGGANQSYYGQQNGVELQSPQPTYGGNQQYAPPPGPPPGKDGMIR
>Arab_Me14_ctg01_-_Arab_Me14_ctg01g539t1
MEKFKTKLQHLRRKPLPDHLMEPKLNLPNGFSHWAVAFIVCNFNVDVGPEIEILYPPTAAFSTADLTAICFNSFPEQQNTETAEDLAFNFTVTNNSPDIKLNSPNTPHGSADLLFASCVFRQEFDDTMKRSFNQRTLVLVSHHNFTSFNNRIVQVMTESGVISDPTTLEGAHAQMNNWSPPSIGRHELPFLGRVLTLDIAPHPSFPLQGLAGPTPLVADPHPSIYAYEPVGSWDTIMNFMPCITDLYVLYEKLVLCESVIVVAKSPQLASESVSSLLDIIKPVPYAGVVKPYMTMQADFSSIGIDGGTPRPFIIGITNPFLLKRIVAAAEKTQGMRPHILYLQNFDGPVPTRRHHSLHHKSSRNVLLDLPGGGIEVHTPSKRFLKSDSAVINQIESVLKLGDQTCSLGPLIRRHFAELTAQFIAPINRYLATSNVVSPGGHQRYASFSISEFLASVAKHGTSVKLRGQGPIQRHRSRDGLYAAFCGSENFYSWLDMKIGLENEASAGLLGAAPLGVKSS
>Arab_Me14_ctg01_-_Arab_Me14_ctg01g540t1
MDPNITKALNDKLYDKRKSGALELEGLIRDALVAQDHDRIAKIVHELCHHYAYAVHQPHARNGGLIGLAAASIALGPEVARYLEEIVPPVLACFSDSDARVRYYACESMYNIAKVAKGEILVYFNQVFDALCKLAADSELSVKNGAELLDRLVKDIVSESAASYISVLHHSDEPLGHPDESPEHPPSEVETAFNLERFLPLLEERINVINPFTRSFLVAWVTLLDSIPDLELIAHLPRFLGGLFKFLSDSNQDVYTMTQVALERFLNEIRKIARIKKGIAESKKSQSKDGRRQSTSSSACSDVGDESEVAENTPLEHRTSVDEGDQVSGESGSLSGDSGKSVNGDGDWIPGQDVHVDHPKILEILVGFLSSPSDMEEEQTEILLTALRWIDAFFEICPEDIMPFVPSLLSHVLPRMSHDADNVRQAAIRVNASLMDYIMSLSEDRQSNGNVNDKIQLPPSLSELGKELTGAQRRDSNLSSRLLKAVIRDQASEGKAGTQSPTPGDDRGPSPRPVPELDYQAAVSALTLQFLNEHEATRVAAIAWLIMLHRMAPGRILTVDDGTFPALLKTLSDPSDAVVTRDLLLLSQISMHSDDSYFTSFMVNLLKLFCTDRRLLETRGNLIIRQLCLTLSAEKIYRTMADCIVKDEDVEFASIMVQNLNNNLITAPELADLRRRLRNLDNKDGQSFFVTLFKAWCHNAVATFSLCLLAQAYEQAYHLLQVFADLEMTVNTLIQIDKLVQLLESPVFTYLRIQLLEPEKYPHLYKCLYGLLMLLPQSSAFAALKNRLNSVSAIGYLHIAPRTYVPQSNTLNHLRQKSSEVGTSSAPQGPSASGFERPNRLKAREEGSVKWAELLDRFKATQEKARRTQQHATMGEDVPVGLETVQEKEAKGPAPVPAKNASLRPNSPAGAMRPPVTGGAANAAQGHKARSSLSNLGRFAGGVAGRKKK
>Arab_Me14_ctg01_-_Arab_Me14_ctg01g541t1
MVLLTMTPAIVRALSRAEQLSPSEHARLQTPGDPTLASPVPGNPISHRQLLALSKLSHQLPCDTDRAEQGRRAPTALDALVRNTAVYVAPPPPRKQQTPAYLALMARLRAQEEARAYQRMLHPPPTRETFSQRFPASRAHLPDPFSIGVDEVDEVDDVSYEEVHRQIILIINVLVSVVCVAVFVWVAARRWSVGKRLGLSMVSALAVAVAEVVVYSGYVRKVQEAKLAEKKKPEIKEMVASWVLHRDGHGEEAVLSTSKEKPDDGPRYRKGKHR
>Arab_Me14_ctg01_-_Arab_Me14_ctg01g542t1
MMRRSSRLATSFARTSTSTSTSTSTSTSTSTSTSTSTSTSTLTSTSTSTLTSTSTLTSTPTPTSRLSIATCPHHTAAFRAHEAHVSSHHAARRRSQSSWAAAAQAASVAQHIRAAPPPDAPLKMDPFQTVAREMKFLTGNIRSLLGSGHPTLDTVAKYYTQSEGKYVRPMLVLLMSRATALTPKAARRASGSSCVDHPITSPSTLNDDNPDASLSSLAHDTAYTANDSDILPSQRRLAEITELIHTASLLHDDVIDHSVARRGAASANTEFGNKMAVLAGDFLLGRASVALARLRDPEVTELLATVIANLVEGEFMQLKNTARDEKKPVWTEDTVTYYLQKTYLKSASLISKSCRAAAVLGGSTPDVVEASYQYGKNLGMAFQLVDDMLDYTISSEELGKPGGADLELGLATAPLLFAWKDNQTLGQLVGRKFSQKGDADKAREIVLASTGLQQTRALAQDYIDQAIAAIAPFPDSDAKTGLVEMCTKVLQRRK
>Arab_Me14_ctg01_-_Arab_Me14_ctg01g543t1
MDSLPKRSREETEDEYDDAPARKRSNSGSPRRLAERPARRYSRDHERDHDRDRDREHDDSADDQRYYDRRTPSQSRSQSSSRSRSRSRTPPPRKPTSLNYTPHLILRGHKRAVSCLKFSPNGLRIASASADATIKIWSASTGQLEHTLEGHLAGVNTLTWSPDSTTLASGSDDKSIRLWDISTGLAHPTPLIGHHNYVYSIAFSPKGNMLVSGSYDEAVFLWDVRAARVMRSLPAHSDPVSAVDFVCDGTLIVSCSHDGLIRVWDTSTGQCLRTLVHEDNAPVTSVRFSPNGKYILAHTLDSCLRLWDYTNGKGRCVKTYQGHSNGRFSLAGAFGTYSSPADPAQRFAFVASGSEDGTLVLWDVSSKDILQRLRGHDDAVLAVDTHPHGPVLATAGLDCSVRVWKASAAPAVQQEESSSGSSSSSSSSNGNSSVKHSRASALPPNPFAADSPALGSSAVDTPVESSPARQE
>Arab_Me14_ctg01_-_Arab_Me14_ctg01g544t1
MPDQKPTSLRVLSLNCWGLKYIATLRHERLTEIGRQIAAADPRPDIVGLQECWTQQDYDAIRELTKGILPYGKFYYSGCFGGGLAILSRWPIEESNMVRYPLNGRPAAFYRGDWFVGKGVACARIRIGPAPKDVAEVFTTHLHAPYEAEPHDSYICHRTAQAWEIAKLMRAASERGHLVIGMGDFNMIPMSLAHRIIETHAPVRDVWRILHPHSSHGAAKDKVEQLRGLPMPSAEFNVSVNGTTCDSAFNSWRWNEAHKKRLKKGENVQIDPAVDDPSAKRLDYIFFSSARHHDPKTGEETAEWELKEANVGMTMRHPTLHCSLSDHFSVECTLTRKHNAHAAHASDVVNRYLPIETYEEIIATLVKYMDRQRIQRKLRIGHFFFQLALWTACMIGVWWSPHNYVSFILMLLSSIGLSVGVIDGLMGLLFGGSEMRALKEFEWERQPSIHHHSYNYPATQLSVHPQSSTRRKASATHSPPEQHTRSLHDCATATDAKMSSSQPQAAGAGQPQAQKLLKADDILKLTSLTDDEKQKYRLLMHNTWNMFNNATPGSAEQTQARTTLQSFSQKFIARERAHRAKQQQALAQQQGGPAQSSQSGPGAPQNPIKQEGQGTAGEAAPSQQQAPQPQNQGQQRPQNPSVDPSIIKHVHEFPFVLPTNYTMGTPEAEAKLKEYKNGYLNMLAKQATLTENIKRIQAQIQERGKSGQEVPQELTNAKNKVEEEYYRMKAQIEKFRGLQKQWKDERQAQGQGAQPAPQPQQTPPQQPQQSQQPSQPQRQPSLSGPSGQPAIKDEPQIKVEGGQPQPQQTQTQPPQFNQQNNQQQPPQQNIQGPTPQLPQQPQQPQQHPQQPQQPQQQQQQQLQQQHQQQQQQQQQQMQRPPVPHSLTMPPQQFPQQGQQQHQLPQQGQARPQINPHQANMQHQHQQSNSPHPQSATTNGPPVPLSHQAAVSAANRSYTDSARTNTPMQSGAGGNFHAPGSREREQLNNPKMPIPRHLNVTSPMPVNMGQQRPTMSGPTNGAPGPMGQPVISRPPPFQLEGEGDRVLSKRKLDELVRQVTGGSEEALTPEVEDAVLQLADDFVDNVISHACKLSKLRDSPQLDIRDIQHVLERSYNIRIPGYASDEVRTVRKIVPAAGWVDKMKAVNAAKVMGGKTDF
>Arab_Me14_ctg01_-_Arab_Me14_ctg01g545t1
MRASTPLLSAKTLLALSAFTQIGVIADSSINVALRASFDPAPYLVELLETAAEENATAYFPLLDRISEGYLDELDTERQLYEKFVELLKSDGHITDPETLASFNLALSVRSAAPRIEAHYQFYKTSVEPSLESEQGKNCQLWVSLGSQQYCTPHIDDGEPIGSIKNERTHELPFDRVLGNSSALPTIVYADISAPRFKKFHKTVSKTAKEGKTSYRVRHKPSLKGPQTPLVVNGYGVELQLKRTDYIVIDDRQAAQDEKPADQKPIGTELDEEAADLKPLAKDDVAGLAEKAASFVLQSDQPMDTLLKLVRDFPKYTTTVAAANATADFLTEHYSNRELLLPTGYNVIWINGVQIPARDVNPYALLVHLRREKRLINGIRSQGLSGPDTISLLSHSAIAQGQTGDEPQRYNFRDEAEGGKVIVWVNNIEKDSRYESWPTELRALLQRTYPGQLPNVRRDIHNAILPIDFTSPDHVSNVIETVIGLVRRGIPLRWGLVPQTPTPNAVEQAKVVYYLQHTYGLSSVTKYLLAAMEAKKLAKPDKASFETAIKTATVRKDRETLEFEDILASEALGERVDQAKYYLERLSANGPNAPAFVNGVPVAQGDNWLSELSQRISMDLRQIQKAVYEGNLKEDSWVPQQFLVQAATKRNPFIIPENEKEIKLVNMAEFEEKYGEIFAKYPCVEAAPSASKSEWAHLTVFGDFDTKSGLTLLKSVAQYRQTNPNLEIVMVQNSDADQSGVSEELLDTYVRAGRQLDSDGLLAVLAQEVATSPMPARSTRMRKAAQPLFEELELKAGELAVLLNGRFVGPIPKDKVFSSEDIGTLVSYEMNKRIEPLSNALEDLQLTAKIATPFDAAKIQSLVALSTVSDVPEGIFETVSTLRTSGYKNWTAEHTAIVKGNRETAIFQIVASIDPATEQAQKWIPILNTLSEMDGTHLQLFLNPKQMLQELPVKRFYRYLLGSKPRFNADGSVESFKAHFTGIPKKALLNLGMDVPPSWLVAPEESIHDLDNIKLSTLPADANIDAVYGLESILIEGHSRDTTNGGQPPRGAEVVLSTERDPHFADTIIMANLGYFQFKANPGFYSIQLKKGKSQDIFSLDSAGAKGWAAQPNDESSELVLMSFQGTTLFPRLSRKPGQEEADILAEEESLASELASKGTEKVNKFLSKIGLNLNTEKVFKKGAELLAGAKPVKTQADINIFSVASGHLYERMLNIMMLSVMKHTNHTVKFWFIEQFLSPSFKSFLPAMAAEYGFQYEMVTYKWPHWLRQQSEKQREIWGYKILFLDVLFPLDLDKVIFVDADQIVRTDMYELVTHDLQGAPYGFTPMGDSRTEMEGFRFWKTGYWANFLRGKPYHISALYVVDLNRFRKLAAGDRLRQQYHSLSADPNSLSNLDQDLPNNMQFNLPIHSLPQEWLWCETWCADADLATAKTIDLCNNPQTKEPKLDRARRQVPEWTVYDDEIAALAKRIRGEKEQQAVVDVQAEEQVREKREKDEERKRDEL
>Arab_Me14_ctg01_-_Arab_Me14_ctg01g546t1
MSRTSTSIELQEYPRTPHTITQPSSIHQKENDALSLTEEVQPINTLRNAVSAELLGEPDKKTTAIVLLTVVCVTMISSMLSGVVAVALPSIAKELELGPDVLLWPISIYALTCGCTLLLLGSIADVVGSRPMYLIGCFLQSGFTLACGLAETSTQIIVFRGFAGIAISFCLPSAVRIITSTFPQGKSRNIAFASMGGGQPIGFSVGLVLGGVFAETIGWRWAFHISAIINSAVFVIALFGLPKVKDKKENVWSRIRNDIDWVGIVIGSASVALLSYCFSVISKSTGKIKEPETLSLLVLGFALIPSFILWVGRQEKLGRPAVIPNSLWRNRIFSVICIGVFVVWGVFNAIESWQTLFFQDVQEISPLQTSLRFLPTPIGGALSNVVMGLVAHRVRADWACLVGVALTSIGSLLMCIIQPEWTYWACAFPAVFLNPVGADVLFTVSNLVITAVFPARDQALAGSVFNTVAQIGKSVGLATSAVIAASVTQHSKMADKESPVALMEGFRAAFWYVFALSCAIGVLFAFGLRGIGKVGMKRD
>Arab_Me14_ctg01_-_Arab_Me14_ctg01g547t1
MRGIVRYNGAPTGSLTTFAWDANSKDACVNVDYSLLKPHFKHSIFSPELQNPDLAVSIAKDSSNLFKWDIGLSSMHVIWDKPSLLQIAEGNATWESAENVYLLPDANKWVYWVIDTKLPVPYPIHLHGHDFYFLAQAASATYDSSVELNLNNPPRRDVATLLASGYLVIAFYTDNPGTWLHVAEGLALQFVEREGEICALFDTAALESTCKLWEDFNVEKFHIEQDDSGV
>Arab_Me14_ctg01_-_Arab_Me14_ctg01g548t1
MSDPKRRRTGDEDISELRRNARQTYLAQREAQQLALLRRQVAEEAEEEERLGSKLSIEERKDFARNRETLRLAEARNAIDEHLDGYLLPDADLSRNTALTKRHNEREKGYDKSEVQLWEDEQLSKIKSQVKKAERVSADDYEFVFSNDMAINFQSDGMPDPDKALLEKQLKEAEQKVKTMEDVRKSLPIYAYRDELLSAAESHPVLIIVAETGSGKTTQVPQYLHESGFTKNGKIGCTQPRRVAAMSVAKRVSEEMGVRLGRECGYSVRFDSKITPEVTKVEYLTDGLMLKQLMSDPLLSEYTAVVLDEAHERSLATDLLMSLLKELVAVRPEFRLLVTSATLNATKFSEYFGGAPLFNIPGRTHPIERLYSSSPEANYLNAAVTTVFQIHLSQGPGDILVFFTGSEEIESAGEYILETSRKLGSKAGPIIVAPVYGALPAEDQQKIFAPTPPGHRKIVLSTNIAETSLTIDGIRYCIDCGLEKQSVYDHKRSMNTLVVVPCSRASAEQRAGRAGRTGPGMCFRLYTKYAFYNELQMETEPEILRCDLDGPMLTLKTMGINDLLNFDFIDPPSATAIAASLEHLYALGYIDSMGKVTKLGRRASELPLDPKLGKALLAADKYGCVEEMVTLVSMVSEAGTLFFAPKDKKVAADLAKQRFSEESAGGDLIAFLKIWNEFVENEFSQAWAKENFLDYRALNRVRNVREQLQRLCDKVELPHSSSGISDHVKILKAFTSGYFTNVARLNRDGQSYSTVSQKLSVFIHPSSCMARKQTRDRWIVFYELTSTSKEWVRSVAPIQAEWLTEVAPHYHKASQIEELTDKKQSKGTGKVGVVRRPDSLHV
>Arab_Me14_ctg01_-_Arab_Me14_ctg01g549t1
MSALFPRAASRALRSSVRPALRAQRPTATFRRGLAVPAEQPRLRIGSIAPDFDAQTTHGKIKFHEFLNGKWTILFSHPADFTPVCTTELGAFAKLKDEFDARGVQMLGLSANDLSSHDQWVDDINETQNTTVKFPIIADADRKVAFLYDMIAQDDLDNIKEKGIAFTIRSVFIIDPAKKIRLKMDYPASTGRNTTEVLRVIDSLQTGDKKGVVTPINWTVGDDVIVPPSVSTEDARKKFGDVKEVKPYLRFTNVGK
>Arab_Me14_ctg01_-_Arab_Me14_ctg01g550t1
MSVASSAPGTGGFLKFNNGPPKIFMTDSTPHPPEKALLSWKEEGYDVTYIQYEPSTQPAYIRTIKTLNDNLELGEHYALIAYGAAASVVLKTAMKPLNKCCAIVAFYPPVLPSAKASFPESSNPQVHVAGKSQTSPHPEMCQWKLYRYDNCATGFADPSSTAYSEVEANLAWSRALACVRKGFKKEVDLEPVVQSFWTAKYEDDVPERASMGVVKNMTQNSPHITILPTLQGGVGRKKLEEFYREFFVPSLVDDFRIRLVSRTMGVERIVDEMVVSFTHSDEVDWILPGVQPTDKFIEIPMVSIVAIRGGKLVSEHMYWDQASVLVQVGLLDPKLVPKKFKSEGTKQLPVAGAEAAKQLVEPQQGRYNKLLQMHGLFDGINGN
>Arab_Me14_ctg01_-_Arab_Me14_ctg01g551t1
MDDSAFEVETDLSTQSILLAAAHHDIPALRNLLRNTSANVQDAETGFTPLHAAIAACEFDEDETPAAQENGESSDTKSGRKQDIEAAIKTIKLLFENGAIWNDLDSNGETPGCIAQRLGLTELYELCVDAGVRAELLLSRLDQYQLLGGDDSDEDEDEEEAEEEAQETAEDVEIIDMDISEEVAQGDESTENPNYLASNLTFDRDRLTDDAGNGVMMEWETTLMQRSAERLAPAPGLRVLNVGHGMGIIDGILQEKQPKAHHIIEAHPDVLKRMKEQAWDKKPGVVIHEGRWQDIVPGLVEKGELFDGIYFDTFAEEYKDLREFFTEYVIGLLDPSGGPDGGGGKFGFFNGMGADRQIVYDVYGKIVEMDLFEAGFDTEWETIQVPYLDEQGEWEGVRRKYWVLKEYRLPTCSFIG
>Arab_Me14_ctg01_-_Arab_Me14_ctg01g552t1
MMAEQIRTGACLCKKITFRVEGEELNFAICHCTNCRRNCGATYTANAWFPDKVLFFSSLEVSTLTRLKQFEWTTGEDLLKQYDDRDTETSEVVHRWFCTDCGSPMMTKSPRMPGITIVPSGVFDGQHNWKPSYEQWRQSKVCFVEPIRAVKDKSRYDQHPDLNEFEDIWGKSGARPAQEFIDR
>Arab_Me14_ctg01_-_Arab_Me14_ctg01g553t1
MPIKTWLTETLGIRVPLVQGGMMWVGKAEMISAVANAGALGFLTALTQPTPEALRQEIRRTKSMLKPSAVQFGVNITLLPSMNAPDYAAYARVVVEEGIKIVETAGDPTPVLKYLKDNGVTVFHKCVTLKHALRAEKLGVDCISIDGIECAGHGGEYDTTSLMLLSLCKEQLKIPYLASGGFANGRQLAAALVLGAVGVNMGTRWMCTVESPIHHNVKEAIVKASENDTVLVLRKFRNTSRLHKNKVSLEVHKIENEKKDVEFKDVAHLMSGKRGQGVYETGDVDAGVWSLGMCAGLIHDIPTCEELAKTMERDAIETLTQSNALIVKSAKL
>Arab_Me14_ctg01_-_Arab_Me14_ctg01g554t1
MKCLISLLSLVAVLPAVQGIVFGGPAPTAATLKRALDSALPKPTIAPTNDELKKRQTNLHPETCGWVDGIYSSGVTCPGSRTCMLYTSAASGMAGCCDGANTIDCGWASSCVDAKAYRSEGCGSDCLLNSFIRKCTATTAPYCVTWLYPSNGVHDYGCAANSDSSVSTIFETATDAFGATTSMHLPTVTANAVSTDVPGSTTRKTAKKVAIGLIIGVVVAVLFVLFCVVIGIVFCIKKKKKQRQIAASTQAMAAVHATRPQSQYPPNQQQYPYLPTQQQQQAPVQTQMQQPSPFHPLIDPQSPASATTSYFAHGAHEEKPNAHTSVQEYAMTPISSPSTPAPVYTQPHVVPPPMPVPVVSQYRAPTEAHEVDAISVPHAPNQAGPVHEMGNGK
>Arab_Me14_ctg01_-_Arab_Me14_ctg01g555t1
MAVAPAQPGTGASLQPLGAPDPTKLQRVREVFAQPVLASFVAGGVAGAVSRTVVSPLERLKILFQVQSVGREEYKMSVPKALAKMWREEGWRGFMAGNGTNCIRIVPYSAVQFSAYNVYKRFFESEPGAPLGAYQRLLCGGLAGVTSVSFTYPLDIVRTRLSIQSASFSSLQREEGKKLPGMWTLLTNMYKTEGGLPALYRGIIPTVAGVAPYVGLNFMVYEIARTQFTHEGDKDPGALGKLGAGAVSGAVAQTITYPFDVLRRRFQINTMSGMGYKYAGIGDAIKQIVMTEGIKGLYKGIVPNLLKVAPSMASSWLSFEMTRDMLMGSWNSGFL
>Arab_Me14_ctg01_-_Arab_Me14_ctg01g556t1
MACVHVDAPELRPPGANQSVYREDCTQCFDSIDDPTGLDVCLYCFNGGCTADRSHSILHVSATNHPLVLNIKRTRKQVARDEPPAKMTKLSIAAETETDRYDTTTTVKCYECGVDEVDKSSGKLPGLVDAVLKANTFARQEEVKAWEQEMTACEHTLCLEQQEARQIESGALGHCSECELNENLWLCLSCGNLGCGRQQFGGVGGNSHAVGHTKSTGHPVAVKLGSLTADGTADIYCYACDEERVDPELPNHLAHWGINIKDRVKTEKSLTEMQVEQNLRWEFSMTTEDGRELKPLFGSDFTGLKNLGNSCYLNSTLQALFAIPEFRDRYYLPEQGPPDAPLPAEDLETQLRKVADGLISGRYSKPDSDVIASEDTPEVPHQRGLAPAMLKHLIGRGHAEFSTMRQQDAFELLLHMLKLISRSQHIAPFKDPVDAFRFVMEQRLQCISCKRVRYRTDEQENISIPVPIRRVPKDAQMDATDSEGKEKEKEEFEAVTLKECLDIFTAEEMVELTCAACGSKEGFTKRSLFKTFPSVLAVNARRFEIVNWVPTKQDVPVIVNDEAIPFDAYKSAGLQDSEEVLPDDADTGSSSKWTPNEAALSMLEAMGFPRVRCEKALHATGNIDPEAASNWLFAHMEDPDIDDPVDFNAGSGSGSGGGAPSAIDPEKIEVLNGMGFNAPQARQALKETGGDMERAVEWLFSHPEAAGDFGDDANAEAPAESQEKSLPGSDKLPANFQLQSIVCHKGSSIHAGHYVAFVRKQLPDEQDAAWVLFNDEKVAKAADIDEMKKFAYVYFFRRL
>Arab_Me14_ctg01_-_Arab_Me14_ctg01g557t1
MFRRVAAAVPAQAGRVLATAARPSITSPIRTAAPALSAAGRRQYHEKDKSLFCATRPRNVGSMSKTDTDVGTGLVGAPACGDVMKLQIRVDPNNNTISDVKFKTFGCGSAIASSSYLTELVRGMTLEDASRIKNTEIAKELCLPPVKLHCSMLAEDAIKSAISNYYTKNPNARATDLGGKSAPLPKVEVETVSAA
>Arab_Me14_ctg01_-_Arab_Me14_ctg01g558t1
MTTNDTECRQSIIPHALDDLSNTQRLEREDSWTPDDSSDISDIDGATQLRATTGTDTAGNRSGNTTAIPSDGSEDGTYDDRDQDKYKKKESIQVLIDSPGKKTQHRLTAEDFREIVRSGMQKEVEKLSGKSKARLRDLVFTRQFTTFDRQNPSASQSPFHGFFTLFWIAMALLLTRIAAWNYKEQGSVFGNAEILHLMVDRDLFVLLATDATMCAATSFGFFLHKAIAANYLSWSGSGWIIQSVWQAFFTGFVIFWTFWREWPWTHTVFIVLHVFVLLMKQHAYSFYNGYLSRVYCRRNLLDQKIRQLDDLDAHQGPSPTSPSTETLAATGIDHNDNNDMSCRKSRGPKFSTDFSTEESQIASIGQAIETSEPLDAEQISTFRRILTTEVTVLDEELRGKCTTTDNMYPNNLTSYNFIEWTCLPTLVYDLEYPRQERINWWYVAEKTAATLGVIWIMIVISQAYIYPVVVETTRQKEAGMSLDERWKEFPWVVSDMLFPMLLEQLLSWYVIWECLLNVLAEITRFADRGFYGAWWNSVSFDQYARDWNRPVHNFLLRHVYHSSISFFHLSKMQATFFTFLLSAVVHEILMFCIFHKVRGYLFTFQLTQLPLAAFMKTRWMKGRHTLGNVIFWFGLFIGPSVITSLYLIV
>Arab_Me14_ctg01_-_Arab_Me14_ctg01g559t1
MARRHGYNRSSTCFRPSIYDDYALSDYACLVVFLAVYLGTLITLCIVRRGTGAGKHLIGLPYMLALSFKFIQQAINFVSSTLQACEVTYGSTDVYSWIIAINVFYGLETIMLLFVVLWTLNTMLRKQLGHNPSALRMGLIAVLTILGILNAVSVILYSYTSWLSRDYRNLVDFNYTAVYYVDLAFWSVYLASILASATLSLLAVRSPKTKRVAGGLLVLWASILYLSLFVYSLIPVIRSSVLFIPQGQISRAGYLAMYWISSLFHALVFISIIGIAKDGTWRPNTFAATGAPVEREHDAYDHQQDPVYDGAGQRA
>Arab_Me14_ctg01_-_Arab_Me14_ctg01g560t1
MDDILQAQFDRVEQALSTLVDSIASYNPNPQAAIDLVAADDELSHGLDQLARHQANHARIQTLRAEADALEEQLKSSVAALAGLRKELSETPATVFPEDSRPVPFDELLGYAKNISKYTVPPTFRERVPEPELESHKDKDAFEGSASAPATNGVNTPTTAAAAVEAPKGNIEPPKEGAGTDAAAPEITAEEEEWLKKLKDSGFAWFPWPDDAKIRRGNLWKVYHYREHGRNLDEFNIEAYEEEEKKKFLDAVQPQQAPEEMQAEPQFQEQRAQQAPQAQAAPAAPAGAGFTLFDDMESDED
>Arab_Me14_ctg01_-_Arab_Me14_ctg01g561t1
MQSQNSRRNTDYQSHNDNMSRHRMPIASHEMHLLEHEHSPLKFARPRHADIPHRTEVGYVHYKAVMGVALANAVCEFRKELASRSAVEYLKLENEKLIVRYYSQSKLSQQELADLQKATHFDKKELQQWYKGFLKDCPSGMLTKEEFQKIYKQFFPFGDPSSFADYVFNVFDADKSGTIDFKEFICALSVTSRGKMEDKLDWAFQLYDIDGDGKISYEEMLAIVEAIYKMVGSMVKLPEDEDTPEKRVRKIFRMMDKDENGSLDMAEFKEGSKRDETIVSALSLYDGLV
>Arab_Me14_ctg01_-_Arab_Me14_ctg01g562t1
MRRLDISVSGTVLASLLTLAPLPAAAFYFPGTAPTSYKVGDAVPLFVNHLTPADSQNDPKLRSVFSFDYYHEPFHFCQPKDGPKYIKESLGSILFGDRIQDSPFELKMGVNETCKALCGPQEYDSRDAVFVNSKIKQGYDLNWLIDGLPAAQLLKDPNSDLPFYSPGFALGLVDGENPIFNNHYDIVIDYHEAGPDNYRVVGVLVDPYSMKDPKQSECQSAQTPVILNEDKGDKVDFTYSVYWRLSPTPFATRWDKYLHVYDPRIHWFSLINSAVIVVFLVGMVSTILVRTLRKDIARYNRLDQFALDDFGDNGDVEDGVAEDSGWKLVHGDVFRPPKSPLFLSVLLGNGAQLFAMTALTIAFALLGFLSPSNRGALGTVIIIFYTLFGFIGGYVSSRIYKFFHGEKWKLCFFYTPFALPVVVFATFFLLNLFVWGRGASGAVPFTTMLVIVIIWFVISVPLSFAGSWVGFKQGAIEPPVRTNQIPRQIPPSGGYLRPLPSMALAGVLPFGAIFVELYFIMNSIWFNKVYYMFGFLFICFGLMIMTSAAVTVLMIYFLLCAENYHWQWRSFFTAGASAFYVFASCLLYWVKDVSFLSWTSGVVYLGYSALLSLLVFVLTGTIGFFASWLFTLRIYRSIKVD
>Arab_Me14_ctg01_-_Arab_Me14_ctg01g563t1
MGRITSAVQYALTHPILFIYQILQYILDILLSPTPPPPHAKLSRPKIAIIGAGLTGVSSASHCVGHGFDCRIFEAGSKSSVGGIWSKVNNTSGLQIHSIMYRFHPSVHWKKGYPDRKQIVSQITELWKKYGLEEKTHFDTKVERVYKDDQGRWIINDPSYGHFDGVIAAIGTCGDPKMPTLPGQEHFKGDIWHSSQLDGKSAKGKKVVIIGGGASAVEALEFVAASEAKHTTVLARSEKWIIPRNPLVDALLALNVFGSETIFSWIPEGILRHLFYRDLYDLSPPRDSGKGIFTETPMVNSQIFDLIRDDKASWLRGDTNGYSSSGTGISFTQRSRGVPKNGPGSEKLIDADIVIMATGYKRPSLGFLPDEVFSEPYDPPNWYLQVFPPGHPSICANNCTYVNAIGTVGNYHIGIYTRFLLMYLVDPLARPRTWWMKRWIDVTRFIKSKAPGGAFEFFTYSELIYWFLFTIVINPFRWKWAAFVLFGLGAGLPLSVVKQEDRARNGTGLRNIWANDESGKED
>Arab_Me14_ctg01_-_Arab_Me14_ctg01g564t1
MAFSQNNNSVEIRLCTAVNDAVRARNAVELASIVLLEPPFPPIYEELVQSLRNNYPQNANNSDSRLDQLVRKAVTETAEYQDEQGKPVQGWNAMVTFLVGWMTFLRDMDLDNLLHTYQGLKDLQERQANSALTHPIKGVLILPTIVNYARVFSRVALGLDKHPELIQHLLTSNDEGSRESLSEKAANVVRVAFTQCLNDRVGTQDKKLGIYKMANICLKILFQADKPESCETIFKNITNSSPPLHLYPKPEQVTYLYYLGRYHFANTNFYAAQLVLDHAYDLSSQRPQFIKQRRLILIYLIASNLILGRSPKQDIYALPEAQGLHAIFDPIAKAIKSGDLEKFRRITNTDLSDPSAGWLMKFRIFYQLGNYCEVLVWQSLFRTIYRLTGQEGGSTTNSAAVLDLNAVHVAFSYLEAQAKIKNGQFSEQGRGAGRRNFGHIFQDHASVSKSSYIDPDFAGVEGVEPYNHEVDLAEVECICATLITQGFVAGYISHQTQRLAISGARRPGGAVKNGFPAPYGVIKSKNSDNVLGWKKDAGGGTQGQVIRMSGAKAAGE
>Arab_Me14_ctg01_-_Arab_Me14_ctg01g565t1
MGDTMKAVDVKNGKGPIDALHITDIPKPQLGKSQALVKVKAFGLNRMDLFQREGKYPVPPGASKILGVEFSGTIAELSAEGGGKEGFKEGDEVFGLAYGGAYAEYIAVSTHMLVRKPKELTWGQCAGIPETWITATQAMYLVGKYSAGKSILWHAAASSVSIAGIQLSLADQASAVYATARQDAKCDFAVKELGATAAFNTTTQDWADEVLKATDGKGVDIIVDFVGASYFQNNLKAVAKDGVIVNLGFMGGTQVPEGTDISAFIMKRCTFVGSSLRSRDEDYQGKLRDQLVEHALPKFKDGSFKLFIEKVLPWEQIQDAHRLMEENKTKGKVICTIS
>Arab_Me14_ctg01_-_Arab_Me14_ctg01g566t1
MAEQAITQGAIKSIFEPSGCFVEHPVLQCVQIKTMEPKAGDANPVQRFRVVLSDVRNFIQTMIATTANEIVTSGRLKKGSIVRLLKYNPQQVKDKNILIIMELDVLEQYGELEKIGQPEALDTKPKQQPAAISGNNFYGNKPAPAPAPAPQQQQRSLPVHQSNPSTSTHPHLYPIESLSPYAHKWTIRARCTHKGEMKEWHNAKGTGKLFSVNLLDDTGEIRATAFTEVAERLYPIFEEGVVYYISAPCRVTLAKKQFSNLPNDYELQFERDTEVEKAEDQDNKPQIRFNFTKIGELNSVEKDTTIDTIGVLKEVGEVTTITSKNTNKDFSKRELTLADDSQTSVRLTIWGKTAESFEAPLESIVAFKGVKVSDFGGRSLSLLSSGSMMLDPDIDEAHKLRGWFNAVGQNATFSTHQSLAPASGGSKNDSKIISQVIEEEGYLQDTPTYMSIRASVVYVKNTTVAYPACSTPNCNKKVIEENPGSWWCEKCQTSFPEPTYRYVLSVNVADHTGTLWLSCFDEAAQLIVGMSANEVMKIKEADEENNTTGNFLNIMQDATCKTFNFRVRAKMETYQDQPKPRYQVLNIYPLNYAQEANKLAQLIKQYDMDDNSLFVN
>Arab_Me14_ctg01_-_Arab_Me14_ctg01g567t1
MADSEIATRAPESDAQEKSVEKSADQSSERPEGAEQSVFPGDTPAQTGPTMGEHCTTDRPTPAGEVPTGELTTLGGVECYITKPSDYPHAPSKLLLLLTGGTGVKSTNNQLQADKYASEGYLVVMPDQFGGEPATSTVSMEEVTEKTSWLDTIKLRAAEGIKAFTIDMWLARHTPEKVLPILHKVVEGAKEEFADAVANGGGVYGVGYCFGAKYILMLAGELPETVGWGQAASGDEEQGTVKKAPVLKAGAVAHGTMVSKEDLDAVRSPVYIAAVKDDPLFSEDEVLTPGRRALETNHVEHEVQIFDGVPHGFAVYGDYEDPKIKHEQSQAFGQMLSWIQGH
>Arab_Me14_ctg01_-_Arab_Me14_ctg01g568t1
MDIDDLLAEVAVNSTPQESRDLQELTRAWVAERTAPEILTWPEDLMDRVLERIRRQIELVEEQTGSMDPKTNFKLIVIQTELERFKFLVRSFLRARLKKIDQHPLHIRVQHTASLDALQPLLSPAELQYLTSHQALLSQHYTASFLSQFPASLQRLDDTTGGISMVDRPDEDKAVFVRALRDIGTVFIEGTDRRLQVKRGDVWVVRWSAVKKWAVGSGTGDVELI
>Arab_Me14_ctg01_-_Arab_Me14_ctg01g569t1
MEMSSPLAAMHPPAAIPGPWGYRRDLPPSKPLFGAHALGPKNFNFRDMSMRKGGMDYFAIQPMRGSSPTASLAADMSSNLHVDQRYARPCMSNPPIVRLLIFFFVSPQLATPRRSLFTSSLFQQVDAQAAEGVTTPPVRWEGVTTPPIPDSSPSFVPDSMDISPLPHKAPFHYITLPSPSPEVMHGDGDDMLSPSELPQLSANNFDIPRPSSAADRKKSILLRPSLSRTKNFSTNTVSFKQQEQQPCPPFRFGAGCDGFGNIGNTSSPSLDECFAPSPPQERRPCSNGSLFASSKAKPFPFGSNLQSRNNGSPLAAIRKQSAAHSRPRPSKMRRSLSMFEHPGDVMNAKQDGDESHSPSGLSSVMDTEESPLLKLPHFTPSEPESLPRIDHATLIQVLDGVYDDMYDEKAIIDCRFEYEYNGGHIEGAVNFCDKEQLAERLFSTPSTTNTLLILHCEYSAHRAPLMAKFVRSQDRKENAHRYPALHYPEVYILDGGYSSFYHSNSTRCFPQNYLRMDAKEHEQSCERGLNKLRQRSKLNRAHTFAIGQHSCQMEDSPTALGRSKSGGNIFTLGDDSPNVGRIGASRRMASY
>Arab_Me14_ctg01_-_Arab_Me14_ctg01g570t1
MLEIELRIDIAIATAPFNVISIEVDVDEPMAQFAILALPVCGLIRADNAQLVTMGDLATKTNVDSIWGSGLPVEAVAIAAELKKGRSRTRAFPNPPSKPLHKSLHNGYHHHFQFGPHQPVTPLLWTLRL
>Arab_Me14_ctg01_-_Arab_Me14_ctg01g571t1
MGSKNRKREREPVQAENVEEVPAKRRRQLNEEHLKLSKLYEDLAAESDEVRFEAAKQLIVKFSPESEPAAKDVETAMVRLIKGLCSQRKAARVGFSLTLTELLRQIFGGVKIEGLDHDVTSIVKMVDEKTEIEGNVPGRARRDHLIGKLFGYKAIMQSSVVIEPQLSMECWNKLLDHIYGMARDIPWLREECGMVLVEAVKSLKAQPQFEQCAEEAIKRLTPFKLVSTPQGVAVWLTVRASYEKVLPEGVWHQKDPLSRKERPRLAKLLKEDFHVDSESAKDEKAIKSAAANPNPTFAWDLVFGEILRRDEENKGSAKEPPKAEFPQLWIDIVDNNLFSTTSSHERKSWGFKLFSNMITRVPAWAVPALFSPNLMRTVINQSKKDDRFLHTAALAALKSVQSRVEQESSSALPILVALTTKHGIVEFDKVTKTKTLEQILLAADDNTLKKVVRHLKSATLRPETVEQSVADSRRQTIADLLINTVKLFRRYDQLSEDVFEGDNWLRSLLELLIEYAYFTPSADVKTSKVPLPPISEGSRTMFQERLSSCLTKLLGVDVGSRSSFASMIMDIIRSKKASTKTLEPVFKAEPKVFETVEKAFETLEKLSKKGSIAGNKMAAEGFVLLYSLTLLQVYNGDGDAIMMLDDLDASRKAMTKNKDSGEGTDAFVEIVLSFLGNPRTLFRRIGEEAFSIFASEIGSEGLQSLAEILDTEENLEGQKELFNQGDDDAEEAKSDDDSDDSEMDSDVEMIDSDVELVNGEAEDSDVDDVSGSASSSDDSSESDGEEDGEEDDAELTQFNNLLQMTLGTSKANMDGDGDDTSDDSDMDDEQMMALDPQLSKIFKQRSQVTSKKKDREDAKQNVVQFKSRVLDLLAIYLDKQYSNALTLEVLLPALRRTRASANKQLAEKSAKMLKTYFDTRSKHKAPLPKPEAVETAWAILKGIHEEAKNGGGAKVHADVCSNASLHVVKVLVGLDKANYAGIVDVYAETQKQWFADKKSPLQPSLFTQFQNWSMSAQKQGK
>Arab_Me14_ctg01_-_Arab_Me14_ctg01g572t1
MAELTPSPDISPVSAATTNGLFPQDSFCLNLSALPDTSNFMLKSALRSPYLLDSPNGFYFGGGGLSNSYRKRPRNMSQSSGTDRDMSTNGTPPATNQASTRALSNGTSSEQRPSNKKRPSTDTVDYPRRRATIACEICRSRKSRCDGTRPKCRLCTELNAECIYREPGIKLDAGDKLILEHLSRIEGLLQTNLAGTFSLATHSPTTSNSTSEDFLGRSNGHMPNLAMVQPINGIGTWTNHPSNISTMPKTHNTAALNLLSSPMIRELVSRPYDPKILLQLEMSREPISLGTTRGLDLSNTGPHVQAYFERVNVFYACVNPYTWSSYYQTALAHGFRGGPESCIVLLVLALGHAGSTGSITLQNPEKEPPGLPYFAAAWDLLPSVMTRNNMVAAQCQILAAAYLVYLVRPVEAWNVLSGASMKLQLLLSAPGRVSPAEEELGRRVYWNAVMIESDLLAELDLPHSGISQFEEGFSLPTGFEDMGTEAVGRDELWYFLAEIALRRLLNRVSSMLYIRTTPYSKSPAATSIAQLDPLVVELDFQLNQWYAGLPPAMQFPLDRVPLQNPVQTVLRLRYFACRTIIFRPYVLLVLQDESLALDSSVQDNCHKCLEACVRQLEYITAHHAGHLPYLFQGALSIISQTLLIMGATMTQSLSQLLPPPETMDDIINNVVLEMERYAHLAPSIRLSAEIIREAEGKRQMWLRTTGLKFEV
>Arab_Me14_ctg01_-_Arab_Me14_ctg01g573t1
MDAFVSQKRKRVEVTQSVAPPQVTPPQRSSTPEQEEESTDIKLALLASLHPAVDEATLLEALLASDGHVDQASASITQSTLASPRKRSANAAIGYQSSLSLYRLNSEGGGPAKKPLVKKGKTLCLFSPEDIEQHTPCSIIHNFLPPQQANALLQQLIDETPTYQRLEFKLFDRVVTSSSTFSFYVNSLAEAEEQKTEYIYDGRKVENVQQSLPEMLRAVPQVEATVNREIERRIRDFYPCSKKLKYQSPHPWKANTAFVNCYDGPQEHVGYHADQLTYLGPRAVIGSLSLGVAREFRVRRIHAEDDKYRKDDGSLADAQGQISIHLPHNSLLVMHAEMQEEWKHSIAPAQAIDPHPLAKNKRLNITYRFYKDSLHPRYTPECRCGVPTVLRCATRKKKSRGRYMWMCHTNYVPGQDGCSFFQWAEFDDDGEPPWAARARADQEKLAKDRQSPPNDGSAENT
>Arab_Me14_ctg01_-_Arab_Me14_ctg01g574t1
MLEFRTQGYNGYSVKYSPFFDSRIAVASSANFGLVGNGRLYILGLTANGIVAEKWFDTQDSLFDIAWSEAHESQILTAGGDGSVKLFDINVAQFPVQSWTEHAREVFSVHWNLVSKDTFLSSSWDGTIKIWNPNHNASITTLPTHSCTYSAQFSPHAPSIVSSVSSDSHLRVFDLRTPASASNHLTLNIPIHTPPKPRMGAAAPVGVPPSEALTHDWNKYRDSIVATAGVDRLIRTFDIRMPGAGPIAVLPGHEYAVRRLTWSPHLSDILLSASYDMTCRVWTDGSAMGAGTMKQENMLDDPMVHGGGREMGRMGRHTEFVTGVDWCLFGAEGWCASTGWDERVMIWDARAIMR
>Arab_Me14_ctg01_-_Arab_Me14_ctg01g575t1
MSVIYKRTERERERDWDTQSQGGARSYTTVRRYKVPEYSLEEDTYEQEMRLVRRPRGEYEERRDVRKELIVERDQPARSEVREYRYSDRSPSPPRREVREYRIEREMDRSPSPARSSAREIRISREYERDLQEQRQDYQPYELERYSRSTEFFRPEPPPQQAPQPIIIRNEAPPAQQPIIIREEVPQPIIIRERIQEPAYELVERAEVYEDRQVARPRVDEDYYYERRVKEVDRGGRRDERYFDEREYGRDRRGEQNYYSDDDAVYVHEEKDTWGRDGSPNGKRSAAAGALAGVAAGQIIRHHRKRKGEEPGGNVGNALGYGALGAVGAVALDRYNNRDRSRSLSSDRGRQRRHRSTSRNRSKSRVKEVVTLAALAGVGLAAYAVGKHSKEKNAPVTTTVVKEHRSRSRRRRGTSRRGESRSRSVTVVEEDGRGRSRSASKHMDPEHRNKRAASVGLASAAVAGLLQRNRSKSRKRKGKRSPSRVRQGVPVVAAGVAGAAVTELYEKHKAKKEARALSRSKSRSRSRSRSVLSRLTGRSSSRPRSTKSDPVLVEYGGDPIYTDRERSRSRGARGRRRRGSSSSSDSRRGSRSRSKSRARSVAETAAVASVAGLAAHEAAKRRDRKKAEKERDRRHEDESAYSQGSYSPGGRYSPGQYSAGQYSPGQSTARPNDSHYFPETNYFPPPPTAPVGHVDGNLPNAPYPPYNPADYPPQNGHGPPPPGGGYVHEDMNPGNPYARQDQNHYHQARRGDENVSAPVPKNSGAEHVTPASLRGGFRPTHAADDRTDRASGVNQARDGSPPLAPSPVSTHEKGVKFDLNPQEQEISPNPSPERSDENRDRHSERRDDTDSDDERHGPDRDRDRDRDHHRRRHADERFNGSQGSGRDRKRHRRAESPGSDTDSTIELPARFDEKGRRKGDDPAADKLESILQSLFR
>Arab_Me14_ctg01_-_Arab_Me14_ctg01g576t1
MLSRRIFRQLTDSVLLESSLLPKRSFCPVAVCVSCSFGGRATAPRARHASSSSTRWKTRQGNDHFAREARVQGLKSRAAFKLLELNEKHKLFKPGQTVVDLGFAPGSWSQVAVNRTTPDGRVIGIDLIPAQPPRGVSTIQGNFLSPAIQDEVRAYVRDPNLGRPRKQTISEEPGGLTEEQMDEIERGYIDIERQARMEGVEMEQLRQPTEGSESVPDAKRSLKERDAREGRVVDVVLSDMSEPWDQVAGLYKKSLSDPYFRMMNTSGNPFRDHAGSMDLCMAALTFSFDTLKTGGHFLCKFYQGSEEKAFETKLKRLFAKVSREKPESSRSASKEAYFVALRRKETVTREEVFRE
>Arab_Me14_ctg01_-_Arab_Me14_ctg01g577t1
MYGMNQAYNAGGGDPSAQVPNHLLAHVHLVSSYRFPVLPQLRPEQAVEYLIKGPQIVRDTSPVAWTYFASPPQDGTVVLTWQPPRMGTHFASDGMVWADPESAFDMPVRGYTLQVLVHSTGYHYPHEPFAMHSRFRYRLTAGPGTIDPNLWLVHYKPAEQQNRLAAGQIPVPRETQATLQMRAQLQAAGPLMRKEFMLHDASNWPKVEFGQQAAMRPQQQPYYNPMQPGRPYVAQPPPAKRMRGATPAQPRPQVSGAVLPDTSLEDEENATQDAFDFLTPREISLSRYKQHHEWTEEIFSSPYAVGSIAPIDLGLGLMGELAPLTADILDAAGAENPDTAKENYRIKDYYKLNPEKLKDFEKRVAEYTESEQAEIEKMKADHARKMAQLKRTRTYIKAERRLRDLSRSAANEEEGTDPSDGVVQDLEKSLGVTFDAKKSVVCVDKGGYIEVQQPPPQKAQVNGNGPQSQSNGASNGSNNDASDFDNTAASLLDQYGTGSLSGTPGNISIPRMSQPPSQSQSAIGTPSLLSGNAAQQSAFDQQTPNLDADAGNDLLDLDVEMSGMANADEKAGEDWLVANDQAGSAQQSGSNPQTATNMNTATNDQTTLGQSTVDADAGSMFDSVPDFSNFDGIDSAGDALADFGQDDNMGLGDLVDDSAFGDAFHEEMGGDGHNA
>Arab_Me14_ctg01_-_Arab_Me14_ctg01g578t1
MAIIAFAQAFQLLLVIGLLCSLTDSKTLVSHPRRHAVTSIQTLSRRQNATADFYPILGVVGLGINTTYARLEIRELQRKPDLFNVYLLGLQRWQNTSQDDKLSYFQVAGIHGRPFSPWDGVPGRTQPPEGYKEGYCHHSSNLFPTWHRPFLALVEERVHHHASEVIAEFPEGDLKTRMTSALPALRLPYWDAAAVPPIGTGSYPWSVQRKTIEVELPDGSGSVKTTISNPLYSYTFHPLPGKDMFGKLPWTQWHTTIRYPSDRTAAAQSQDSKIASQLDLNLVNLRQRTYQMMAMQKDYHNISNNMVSLGGVLDSLESVHDTIHNTVGSSGPGHMTNAAYSAFDPIFWLLHANVDRMTTIWQALNPDSWVTNHSNPTATFTSEAGAYADENTPLHPFHRNQAGDFWTSASVRDHTIFGYTYPELIGLSGNVTLVRRVNQLYGDNATSQFSWKIGDGAPLPAPGTEYLHHERRSVSSPQRGKYQHQYFANIRVQKSESEGGFKVFVFVGPTLVSNTGSTYDATAWMRDPSFVGFTGFQSTNGRGGGYLVNAAIKHDANGVVALTRALEDRVWTEQLSSLDEDAVGQYLHDNMSWRITTAEHRIIAPEDTPGFEIDVSYARIKPPTADSFPEMQDGGYKHLVRATSGRAGGVQDG
>Arab_Me14_ctg01_-_Arab_Me14_ctg01g579t1
MDRVRPQPAPARGRRRSIFTEVGLIDEHTISKERSPAPILVTEHALRHVRPSRTVRFRSRNSIFGGNDGIDKVDDHDHDHDHDHDHDNDIDDSDGPRPSSTCSITHTSSSSRLYRAGLFTIVLALMLPIIQMISVAPFGVHGISIPWASITALADRSTLVERADSQTDVCKRWSGQSAIVNGTLYMYGFRTTTDAQQKSNTWTNDFLSLDLTKSWQISNPSLTGMPQPSGPPALSLGYLYSSHNSLWLYGGQYSDSPAEKPGPNSVWEYNIGSKSWVEHKDPKSSAGTNAEGDGQSIQRAAEGAGFGVTALGRGWYFGGHLDDFTTEGWSNQIARVYLKSLLEITFPGHSNDAVESLKDGKKAETDPVYRNITTGGIQDTGSFPERADGVLTYVPGFGNEGLLIGFTGGDNDTFAQMNVIDVYDIADSKWYKQSTSGTTPPYRVNPCAVVGAAADGSSYNVYMFGGQNLQPYGNQTQKDDMWILSIPSFTWIEVDQGSQSVPPARAGHSCHVWDGQMIMIGGYVGAELSCDSPGIYVFNMSSLSWSDQFTSLTGGKALQDYTGEGSIGNPLAQQANQRGFNASAGVEGSYGYRVPEVVQKVIGGAATGGATLTAPVQTPTAGPLATGSAITYTLTGPNGASYTEIVASSGASGDSGPNIAAIVAGVVAGVFAVIAVYFAFCAWIYRKQVQIWKKHAAMVTAAAEKRDNTFTSSKISSERAPGTMAGSTAGGAAAGSFDIQRVSGENTSYGGAGAANWERRSSVGSVTEDLLDGQEPSFWGTKGVLLNPRRSLRVINRD
>Arab_Me14_ctg01_-_Arab_Me14_ctg01g580t1
MKFSATISAALLASGVVAAPTPGLVSSILGLLTNDLNQLLNSLGIKIQVNGYQHGATVKYHSQCPFTINPVPVVNKTNSHDLSFPKSSGFIDWKTFKANGANLGGWLEKEQTHDPIWWSAVGGDGAPDEWTLCQNLGSKCGPALEERYASFLNTTTIDQMAAVGVNTLRIPTTYAAWVQVPGSALYHGNQQQYLKTISDYAINKYGMHIIIGLHSLPGGVNNLDIGEALMHDGWFYNSTNLDYSFRAVDGILNFIKNSGQMSSYTIAPINEASDNLAGFGTPAGLSVNATNWINTYHSGVLKKIAKVDARIPMMIQDCFQGASYWSPFYPDGTNIVFDSHVYYFAAAGAYSQYINPAICGQATYLAEETKFPVFVGEWSLQTMYNNTLASRKALFDTQRFAWNKYVSGGTFWTAVSYSTAKVDGEGTQREYWSYIDLINQGVITLATNASYC
>Arab_Me14_ctg01_-_Arab_Me14_ctg01g581t1
MRFGQQLKQSLNKDWLFYYIDYEDLKTALRVHHTWDEKSEQSFVEQLEKELDKVYSFVRVKSEEIIRRIAASEKEVNSAVARSQQHLQSQQAAQDEDPFEEDFDLLEEDLSDVIADVHDLAKFTQLNYTGFQKIIKKHDKNTRWMLKPVFAARLKRKPFFQDNYDNYVVKLSKLYDIVRTRGNPVKGDSSAGGKQQNFVRQTTKYWVHPDNIVELKLIILKHLPVLVFNPNKEFNEEDASITSIYFDNTDTWELYEGRLKKTEGAEAIRLRWYGGMNSDTIFIERKTHREDWTGEESVKARFKLKEKNVNDYLKGKLLPSKIFEKERREQKRPEKDIASDEQLAREIQYRVIDRSLVPVTRSFYHRTAFQLPGDARVRISLDTELTMTREDNLDGKKRAGDNWRRTDIGVDWPFKQLPAEDKELFPYAVLEVKLQTAAGAEAPQWIRDLTASHLVEAVPKFSKYIHGTATLNPSRINLIPYWYPQMDVDIRKPVSHKFGIMRPGASNDISTSNTLDDDSDDDDAVMGLPSANSGQDDEQLRRLREARDAMEQNEIARTREYGTLTNGNDPNALDIEERVASQRNNGDNDYPIYDSDSDDEDDDLEEAKRVGGLRYAKKWTEHTAKNVGTALINGVSLLLHPKPTDVGEGGFSLGVPTWKQQGEVKRFKAPKGKRIHVPVRVEPKVQLATERTFLSWLEFSILIGSIAATLLNFGDGLAFAAAWAFTIIACLALLYSVGLYLWRVRKIKERRAVVYHDKWGPSLLCLGLLIAVAVSFGFRLGKGGYDGGLKGDLKGKFGA
>Arab_Me14_ctg01_-_Arab_Me14_ctg01g582t1
MSLQLPQESPSRPLSIRTTGTSATMADKTGETWRSAVDKHNCWEDLILTLDGGGIRGYSSLIIIQRLMHEVAQCERRLQEEEGPVPGSNRREFDEDALLPCHYFDYMYGTSTGGLISVMLARLRMTVPQCLEIYRRVGHELFGHRRNTLPLATKYHHKPLEKAVCEIVGQYCKLHPNCDGKDWHPWDWDPVDEEPSRLSAASTVNSSSTFKSSYTDAPIQPVDRICQSICLTATHNGQIDEAYLLRSYNHRYDQDILPPWVRPYNEGADKLKIWQVTRATSAAPFYFDMLVADLGKKRGRKGFKDGGIRENNPSYAAYSEHASLRGDEHEPALLLSIGTGRPNSNNDGFAAVWPGPLGKIPLLQKWSEKFAVFKNVLIKYTEGEARHKTMRSIAKGEHRWYKRMNVDQGMDGLALDNWEKGPWLNLQTGEEKVVTGGKTLSRMEKATGDYMNRDNVETLDGVREYQPPKIVLQQIAERLVRHRRLREETKNDNLKRWQTHMGQWLTGELRDEDSAIHIPPRTSRKASRSKSRPATPGRA
>Arab_Me14_ctg01_-_Arab_Me14_ctg01g583t1
MPVDAVRRRSAPDRSSSILDKEKEGFGQSGTGLAGLAGLAGRVTPAGGVGVTSQQLRALAWLATGQRRGQNQSPGRRRASDAGCCRSSHGVCPSSLHQGGSHAASQHPRQLSMVSGRRDAMPLPTAAAPVLAARVHGESFSRVTSSLDERPNAI
>Arab_Me14_ctg01_-_Arab_Me14_ctg01g584t1
MTFKSTSTSGTTSSKASSLFDLDENSNKSILVYKYRSDAKGLESTTEGALCAELDKHPSLPFMRVTRKPIPRGASRMDIYQEDLYLPEERDQYADKISPKSSVANVGLPTMAKWKHMVMGSYDDLYIVFQTHTLTPESSKNNSPESSQHVTPAGTFPLER
>Arab_Me14_ctg01_-_Arab_Me14_ctg01g585t1
MFESLLSEKFSHGFDIVLGLALLLSSLFTIILLTLPSQYDPYMDRPRKVVDEEGKEVKVNGKDGRDPLDFKQGRTAQIVVLGDIGRSPRMQYHALSIAKHGGRVFLIGYQESEIHPDIVSSPLIEVVPLVPAPSFLRSSSKLLFPILAPLKVLWQVRSLYRALCYRSQPGRWMLVQNPPSIPTLAVASLVCLIRNTELVIDWHNFGYSILALKLGNSHPLVKISALYERVFAKAAKHHFTVTHAMARVLKDSYGVTAQALHDRPGPMFRPIDSQERSEFLSRLPETAQYAEDLTASTKTPWKLIVSSTSWTADEDFSLLLEALCTYSAQVAAKTNLPNILAIITGKGPQKEHYLSKIRALNQEKKLLNVVIQTAWLTTSDYAMLLAAADLGVSLHTSSSGVDLPMKVVDMFGAGLPVVGWGKFEAWPELVQENVNGKGFESSQQLADQLLALFGDQAGLLQTLKQGARRESENRWDGEWDRVGGKLFRLVD
>Arab_Me14_ctg01_-_Arab_Me14_ctg01g586t1
MASTYALPIAPTSHSHSHGRSQSQSQSQSQSQSQSQSQSPSQSQSQSPSQSQSQSHYFTAPSPNRSGRPKALSPVEEGKNPTSGHQHHRPDMSGQLYGAVRSPYAEYNSNAHNHSHGHSHSHSHAHSNSNGSSHTLASFANGRPNGRLGVDSPQTPRKNAAAAKYGLFSPVQESAPVLPSSSWLDLPEALTALLIPLPYLLATVAYPNAARKLPTTRSEAVVESEPALQVDTATNDAHLLHALFLTSATLLAVGLTARVRSGLDQPLDRRKADSSRSIAAALRDGAGLRQSLTNVSGVLLPFYAAMQIGGAKTALVLLTAVAAGLGATDQRPGKHTRWDDLKRTLRTRRTTVAVLLIGVIVDVTLWGHPACALFGYSALFTSIFAAPPPLPTAGWLLVTGNQTQDSYTSKGSSRASLPKPSSPLISTSEDTLLTCVSGVGLMAITLLLSFFTSPTTSFSPHTIVFTASSVASATALVFFSLPAALRSHRYVGLHLGGLLVIAFTGWQYLHDWHHTVFTALSYTLYACGIVWDTRSSHAHSYAHDHARADHGHSHDHKHEHHLHANPSRISAFLIARTTPGSIIHSVMIERDSRRIAYFGVLNLSFMVVQFFYGFVSGSLGLLTDSIHMLFDCAGLAVGLAAAVMSKWRPNARFPYGYGKIDTLSGFANGVFLLLVSLEIIFDAFERLWEGHELHRLNELLIVSILGFLVNIVGLTAFGHAHHGHGHSHDHGDHDHGHGHSHDNENMQGIFLHILADALGSVAVIISTLLTKYYGWSGWDPIASCIIAILIFLSAIPLVKSSGMRLMLSLPTDAEYGVRNTLQELSSLRGVVGYTVPKFWLEDEGAAHAEAHAKEHEHEHGHGGCSDGHDHDHSHAHGHEHKHSGHDHDHDHDHAHSHSHSLSNGHAHAHTHDHDHDHSHDHSHAPGKQRILGVMHIIASQAADLEDVRERTIQFLKGRNMDVVVHVEREGDGRCWCGGGNKTS
>Arab_Me14_ctg01_-_Arab_Me14_ctg01g587t1
MDSDSSITTPAVMSLTRFAFRAPAVASRSSLRCFSSGPQKQDTALLSILDGSATRNPPANQQQPGSSSLATRLARDAGLDRPTQTREMIESERRSQFQRQMYRKWQPGDVYSPHDLTGAEQRKWKFGRKKPQSDAFDVLGINPINEYKNYTIMSEYMTEMGRIKHSNDTGLRPKNQRKIAKAIRRAIGLGLMPSVHRHPLVVKKSSPSRFL
>Arab_Me14_ctg01_-_Arab_Me14_ctg01g588t1
MPSHLTRVVFRSIIANEPLLYRGCRHRALRPCAMTHHAARALPQSHRRTFFGGLFKSERKIKKMDMPTGLETMSELSHAQQTSARPPAPKDIAEALKSFFTSKKGAFEDFHVGLAHNAFKYLLENPKEGGDQWFTKRELSALIDELVHFRRRPETGGKPHVQFGSALIDQITKMEDSEMATGAAEATSKGAKISKEDEYDCFIRPKFVHLLALYGATSQAREIAIQFYNDYSTIPEIKKKSRRYVWNQVLAGAARENNTDEMAKTTELFNKSSVPLTDITQSVLVSFFSRKQQLDMAKFWYAQPIVTESGKATNIRSATYTALLIGCALGGDLTFGQEVVSGLTKGKVPDKKGWDAIFLWSAAIGKGVDEVERMMNVMVRRTEEAQSNGSGVHAQYPDVDTINLLVEFAMSKSDPYSAERYIALGEKRGIMPNEHTYTMQMQYRLSVKDIDGARAAYYNLQGDFKGSEASVAAINELIQVLCESKQHHYDDIMAIVDDLHERKANFAPETVAKLCLLHLRRVEIHDAMDLLQVHAHQYSPAQRAVISKTLCAFILDGETSTADAWDAYQILRKTFPETSRDDRIKLMNEFFARKRSDMSCHVYFHMRNHTAESHQANRDVYIAAFTGFARCTDAESLELVNNQLKLDFRVEMDTKLRNALMFAHAACGNNKKALEFWRTICESKEGPSYNSIAIAFRSCEGMPWGDQHAKSIWARLKEQDVEIDKKIFTAYLSAIARNFLHDEALALVETVEEEFGYAPDFYILSNWYNMTTNIEKQGKVEAWIKERYPSVWEEMEALGHWVTMDGFGYKQYNINRDLDP
>Arab_Me14_ctg01_-_Arab_Me14_ctg01g589t1
MASHENQPLLSPSFSQTDSTKTSVESDDAQLPHEPIRSIEDDVLPETSTLGRTISWSSAYILVISRVIGSGIFATPGVIVKAVGSVGLSLSLWVLGAVIAACGLAVALEYGCMLPRSGGEKVYLEFTYRKPRYLASTLMAVQAVLLGFTASNCIVFAQYTLYAFDIEPTDFLRKSLAVGLLTAITIVHGCFRKTGIAIQNFLGWIKVGLVVFMIFSGLFVVVFKPQGLDGRRSHFPAGADVWKDTEWGWGTISTALFKVFYSYAGLNNVNNVLNEVRNPVRTLKSVSITALVTACILYSLVNIAYFIVIPLDEIKESKELIAALFFEKLFGATIGKVILPLAVALSGVGNVMVVTFALQARLNQEIARQGFLPFPDLLASSKPFNAPLGGLVVHYIPSLLVIALPPSGEVYSFILEVEGYPGQIFALATSAGLLWLRYSRPDLKRPFRAWNSAVVLRIALCLALLAAPFFPPANQKDTGMWYATYAVVGISVIAFGFVYWYVWLKLLPRWRGYRVEEKAGVLDDEPANWNQAIGADYLNMATAAVSSPTPIPTYNPQIVQSAQEPKVTGPQDVQTVLNYHKPNEDGSPPHPTYTDRPETYDRPVETHPTTVTDVRGRENEFSLDTNGFQFYKHASVEKDFVNDEQIKDQYYKETEQLLKDATGATRIHIFDHTIRRPSPSHSSTTPQLRGPVQRVHIDQSYAAALSRVPFHLPADADTLLKSRVQIINVWRPIKTVQRDPLAVAEANSVSDDSLVVTELIYPTRKGETYAVNHDAAHRWYYKSHLSPEEVILIKCFDSKKDGRARRVPHTAFHVPGTEDKEGRESIEVRALVFHEHESLE
>Arab_Me14_ctg01_-_Arab_Me14_ctg01g590t1
MNTNADRDFHHPYEPYDIQKQFMNAVYDCLEDSKVGIFESPTGTGKSLSLICGSLTWLRDHKRRNFEDGFEIDTTSIDDPPWMLEHARNQRKQDAFRRRQELNDRLAKIKAKEKRTKERSAAGGSVYKRQKVDSDDASEKGAESQFALEDYDSDTERGSDAKVDMFSSSGLSAETQALMNKLGFDVGEKKAENSDVLDETKIFFCSRTHSQLTQFSNELARVKMPPALLLDDKSDSADVGEFTEDVKHLTLGSRKNLCINPKVSRLGNATAINERCLELQKSTSSESKCPALPTKDNEALLNDFRDHALARIHDIEDLGALGKKLGICPYYASRPATKFCEIITLPYPLLLQRSAREALGLSLKNHVVIIDEAHNLMDAIAGIHSVQVSLSQVQQARTQLTAYLQKFKNRLKGKNRVYVAQIIRVLDSIILYMQSISTNSKANDGLVQIASIMSGKGVDQINIFKLNAYLQESKLARKVDGYTAYADVIEKERAVSKHTDGTSQTSRHTVPVLMHVQSFLLSLMNPSAEGRFFYSREDGHELLLRYMLLDPTYHFKDIVEDAKAVVLAGGTMSPMSDYEQHLLPYLDPAKIQTLSCGHVIPPSNLLAVPIVQALNGADFDFTFEGRSKESTIVNLGQAVLSMAQHIPDGLIVFFPSYAYLDTCIATWKHASAPPTNSTFWDRFAQTKPIFLEQRSDQQSANKAPVSREAAVDSVLTAYSAAVASGNGRGALLFAVIGGTLSEGINFSDTLGRGVIVVGLPFPNPHSAEWKAKLQYISSKETARGGDGKAAAREFFENACMRAVNQCVGRAIRHKGDYAAIMMLDKRYGGERIQSKLPKWIRGSLMAATSVKEVERRLDQFFAVKR
>Arab_Me14_ctg01_-_Arab_Me14_ctg01g591t1
MASSSSSRRTRDDEQRGAYTTVAQAEETAAELTAHGKELEQDERQDRDLESALYVGSKPTPEDLLFLPRVADKLPYGAFLVAIVELCERFAYYGLAGPFQNYMANSYHDANGLPGALGLSQSRATALSNFFQFWCYVTPILGAVVADQYLGRYLTIKWFSLVYMAGIAVLFVTSLPWSIERGAAFPGLLAAMVIIGLGTGGIKSNVSPLIAEQVRSTSAFVETRRDGEKVIVDPEITVQRIYMIYYMCINFGSVSAIATTLLELHVGFWSAYLLPLIMFCVGYAVLVWGKDRYIIKPPQGGVIGSCFSALWIAARNGFDIDTARPSAPLNRARVVSWDDSFIDELKTALLACKVFLFFPIYWVAYSQMLNNFVSQAGQMQLHGLPNDILPNIDPITIILLVPVIDRLIYPFIRTRLHFAFSPMTRITLGFFIAAAAMLYAGGLQSFIYNAPPCFSHPSKCEAGSIGGGKFKPNEIHIAWQTPAYILIALSEILASITGLELAYAKAPENMKSFIMSLFLLTSAGGSALGILIAPLARDPYLQWLYFGLASAAAIAGYVFHRTFKNVQDQDAHQSQSVEEFELRSRSSFADDEGVNPDPKNV
>Arab_Me14_ctg01_-_Arab_Me14_ctg01g592t1
MANTNILGLTLTLTPAALTALRIAPLIGSTASLTHAYMEWLVTTSFLSPAPIHSATSRFVLGLNALPSPPAVSGQKPNPEEVSQTYAELEHAMQVVVPHWFTTFFNTALYSVVGFNTFTLVSASLNLLVSSSQSGGEESMRFYGIGLVAAATHYAFVPLVGWSVKALIGLCAGRIQGSGEAGREKKAVEWMREWVGWHRIRMATVDTIAWACFAWGVIEALTV
>Arab_Me14_ctg01_-_Arab_Me14_ctg01g593t1
MPAMSRGATGKPSAKPARPGARSSSKPSSKVRAPKRTKGGTQSSRNHRFKGFSQRIAELKIEPVRRGRNAIIDDAELESTFSYFRDSFLEWKELNLSENFVHFSRKVSPLCDSLPQVLHHSDRIIDLLVEFIEKGEKYSEEPLLSLLAHLAHDLGEQFEKHFERVVKTVAHLAATHAEIEVIEWSFTCLAWLFKYLSRLLVPDLRPTFDLISPLLGRAQQKAFVARFAAESLSFLVRKAGAAYHRDKTPLRLIVRRISGQLKELQDNEKDYEFQQGIMFLLADSLKGIHRGIHSSATAILQALLAEAYHDDYVSLQTPPLEPVLVGVVTAVIHHTDAENFNPLLDIILAQIQSASSHHAALSSRLLFIVCGVRRGSRVQDWKPVLASLDHVLSAAKNMADLESTEAWDLLSATAVVFQYCALDAAIPYEKLLEGLTKGSWDRYFLPFCNMFAELGAERFKTLLLPYFKRFVAQKAHEHGPELCIILPQLYQSGTISAGAVHTSDRWQALLDSPFHELSKVQTEEADLDKSTYHCNALLDALEILAVPEDKTTSIWDELKELLGTAIRVDSTGKARKTDIFGTGKGLQYLVDKSVDDQTFALDLWPSLCQATPVYAHSLSFWKALFSLMQKKKKAISTSGPHMEPLKRQLMRCLGSPSHDMRLTAIYILEIIAGKSEKLQNIISVAMMIEQTPLDLENQRSISMRIGQLAKLYPEICADEWMGEAIPTFCFGLLHVRMASVWDDTCAALKAICDTKEGEGFVSQIAFAWLGEPESLENSASGLAKNTAQKRYANEFECTNIFRLQDLVSNNQELSYNIDDKLEVTFDSKHPQVSFINSFSRTQALRLLNALPQVAEKRSRLLVPVLLDWALDQPVAEIQDEDDMIDEIPVSTQQRWSRKDQKAMLSVFSKFNNPKVLFRSSEVREALLSLLSNGDVEIQKTALQALLTWKDRAVTPYQEELLGLLDDARFRDELPVFLSEGKIQDSDLAEVLPIILRLLYGKVIAGKRGLESKRKSVFIGLKNRFGDDAIHQFLSIAFGPLSGASVLEDGALDEDLLRKDLIDTRKQVGMLNMLDDLLSTFKTTFTPFTVDVVDPIMYCLVKASRDLQAAALVGEEADVDDSRKFQVSLLRTVRQRALQSLARLFESCPDFNWYPYTAAIVKELVEPRLEQFPIETAQSISGLLRLFASWSKATSTAPFLVEHNKEILIKIIDCLDVPSAKDEVKQFVLDDILRNIFSLVATEEQSTSVDAKLQRNRIHTDIIQPYSNAILSRVGGLLRKSPSKEVLESGVLAIADLAPHVVGSTESRSMIEIATFLIRQPSKRVNPRTKLGLLKILHEFIQRCDAKSLGELFNGIYDAICPMFAFFQDRSARSVLCDVVQDLSGNREELADVAKLCQELNSFAKGRVDEPDFERRSQAFNQINDQGYRSFSLMQWKPLVYNMLYFIKDNDELSIRVNASSTLRRFIEVSQDDDFRAFITAAIIPGIQHGMREQSELVRTEFLAVTEQLVKSHRDWAPVADLYALVSDDEEASFFSNVLHIQGHRRLRALRRLAANASHLQPGNTYHILLPLLEHFVFNKADDDSADNLAGETIRTLAALVEWLEWPQFRSLFKRYIGYLTSKEDMQKAIVRLIGGLMDGLNQAGRKKGYVTASQPAADTDDTPEAEPGANADVMDIDTPTSTLSKTLPQQDKLTKDLVNNFLPDLTAFLHKKDEATTSLRVPVAVALTKVLLVLPSTEIEGRLPGVLLDICHILKSRTQESRDQSRKTLSEIAVLTGPNYVGFILKALRTALQRGYQLHVLSYTLHYILVNMASQLKPGDLDYCVADVVDIVMDDTFGVTGQEKDAEEYISKMKEVKSSKSFDTMDIISRSSTPAHLIKLINPVKSLLLERINAKMVQKIDELLRRIGLGILQNPTVYSRDILVFCYELIQEVYRASATTQKGDKTDPKLRRFLVNRRGAAKSGARLSTSSYIYKITRFSLDILRTVLRKHDDLQTPQNLAGFLPIIGDTMVQGQEEVQVSAVRLLTAIIKVPMDEMDANCPVYVDEAVRAIKGAHSSNTELAQASLKLVAAVLRERPNVVIRERDIGHLIKRLLPDLDELDRQGVSFGFLKAVMSRRIDVPEVYEAMDKVAEMMVTNQTRSARDLARSHYFQFLTSYTQSEKRFKKSMEFLLKNLRYEHVEGRQSVMEALDLIITKALPRFPEKAQFDYHGMIFLPLINTLANDDSAKCRELASLLVKRLFQHASEKRLQNFTNDLKSWLEQGENTGLKRLGIQCWGFYFEALDTEDDEPKELSYVLDGLDSTIDESLARRDEDDWELLYYSLTLISKICKKYQDTMLSADKEGLWTAVQVSVSYPHAWVKLKAAELMGTYFAHLAITNKDVGLGALPLKGSGGLQLAEQNMIQLTNASLRNLLNPDVSEQLCTQSVKNIAFLARCLAVNDAKWQWHNADDEDEVEEVPETNAADDDASSEEDVTISKKTPPAAIHRLMIRLSGIIRRDTSSMNAKTAIMNLLETMAAKFPLEPLTTSLPHLLTTFNTLVDPATTIPRAHTNASSTSLNEPNELYKALIDKARETMNTLQKRMGTQEYLKVMSDVQKAVRERRDERRRKRKVEAVADPEKWGKEKKRRNDIKRVKRKERGAEHRGQRRGW
>Arab_Me14_ctg01_-_Arab_Me14_ctg01g594t1
MASKIVVIGDVDGQFQPVFQKVNALHAKNNFAFALIVGNLFNSTQSSSDVAEPSVQSLVDGTIEVALPTYFVLGSHALPPAVVQKLQSSDDELCHNLHFLGKRTTMKTSEGIRIVALGGQMDPNIIAGQSKDKYPPFYGETDAKILRGATTADILITSDWPEGIQKRSKVEVGGEASPSTQQCIADLDIVLKPKYHFSASGGSFWEREPFFHTPSDDTDNLYPVTRFISLAAYGNPSKQKWIYAFSLDPAASNPVAPPSGSTVCPLVLSEKKRAAPGPREQALVYDDGNQGGRRSHKRRKGEPRGPLTAAECFFCLANENIAIHLVTSIGDSSYVTTARGPLSTSQTYPKLGFPCHMLIIPFSHQPTLAAMEEEERLATYAEMQKYRVAMNSMLNSVAGEEYGSVAWEVSKSSLPHTHWQYLPVPADLIRKGLVEAAFKALAENLHWPAFTKEDVGDGFEETSDFFRVLVWDPKNDPAKQSSLVMRFDEKIRFHNQFGREVLAKLLRLDKRIDWKDCGQTQPEEEKDVEMFKEAFKSFDFAAE
>Arab_Me14_ctg01_-_Arab_Me14_ctg01g595t1
MKTAILTFALAALVSAAPAPLVPRAPPGVPTTAAAKTQLAGLTVAAQGPQTGYSRDLFPHWITQSGACNTREVVLARDGTNVVQDSSSCAATSGTWKSPYDGATWTAASDVDIDHLVPLSNAWKSGAASWTTARRQAFANDLTNPQLLAVTDEVNQAKGDSGPEEWKPSLTSYYCTYAKMWVRVKSVYSLTITSAEKTALTSMLNTC
>Arab_Me14_ctg01_-_Arab_Me14_ctg01g596t1
MRLLALAAALAALAHAQNLDITVTTPVECVRKTQNGDSVQMKYKGTLTDGTEFDSNYGRGTPFEFKLGAGQVIEGWDKGLLGMCIGEGRKLIIPPGMAYGNQRVGPIPAGSTLVFETELLGIKGVEAEPKPIDAGNEPILPVKPTPTQLDEAPKSSDVAKEENMPTPPAEASSSVAFALPTAEPSNIASATGKHPLDGEDGKGECNLLGDFALIVQGALGLLAVSSLAVKRLREHPRRPMKIWFFDVSKQVFGSVLLHLANVLMSMLSSGQFDVQAQTQAVALTAVATEKGDEPNPCSFYLLNLAIDTTIGIPILVLLLKVLHRAFLLTPLASPPESIRSGNYGYPPRATWWLKQSIIYFLGLIGMKLCVLAIFALLPWIAWVGDWALRWTEGNTALQITFVMFVFPLIMNALQYWIVDGFIKDPAGQESGYEGVGGEDDDDEDDDEWLERQRRRRAAGIDGEDSDIEDDGSKGLTEANPTTMPARQHYDPATDGEGSSREASKTRTD
>Arab_Me14_ctg01_-_Arab_Me14_ctg01g597t1
MTSDSAVARWLDDTASRQPPDTLLHPGDEFPLRTFSNPPSASSLSDISSDDANDNAPRRAPKTTLRPADVAKLIHPPTPTAAAFGGMEPSTRRRSSSITGAAAAATSKKKERSHRRRRDDHIAEEGEDGSANASDSGSRSDSTDFELDDMSADGLEDDEETGLTKKVRRKNARRKRRNTLLDNRIVPDAGLTFTKEEKALADQSLYRSMLVNAVLICLWYLFSISISVYNKWMFKVEKGDGATQNIFPFPLFTTCLHMLVQFSLASLVLFLVPSLRPRHDSLNPHATGARAEPLDPKKPLMTKWFYFSRIGPCGVATGMDIGLGNTSLKFISLTFFTMCKSSALGFVLIFAFLFRLEQPSWRLVLIIAIMTVGVVMMVAGETAFHALGFILVMASACSSGFRWSLTQILLLRNPATANPFSSIFFLAPVMFFSIFVLAVPVEGFGALQEGLAHLFEQKGTAFGIGILIFPGCLAFLMTSSEFALLKRTSVVTLSICGIFKEVVTITTANLVFKDPLTPINLTGLIVTIGSIALYNYMKIKKMREEHLLKVHLGGQEEYTPINTADPDQGGSRPSINVSRGIRASLQLAPGVSGPAGIDSPARASPVKRPEDLD
>Arab_Me14_ctg01_-_Arab_Me14_ctg01g598t1
MAFLFRNKQKSNAELTRSTKDLTVRLSQEDKPNPKLEEELARDLQQMKLRLQGTPDTEVNPELVFQLLSAILSDDLLYTLAINIHKLPFESRKDAQVVFSSAFRYKPAGQTDPQVLHHIVQFRPDIIIALCRGYDRRESAMPCGGVLREALKYDAIAALLLYDEGDEEGKQLDLANVNPDIPATGNGIFWRFFDWIDKGAFELSADAFNTFREILTKHKPLVATFLQTNFELFFSKYNSMLISSESYVTKRQSIKLLGEILLDRANYSVMTQYVDSGEHLKIIMKLLRDDRRMINYEGFHVFKVFVANPNKSMAVQRILISNREKLLRFLPNFLDDRTEDEQFIDEKSFLIRQIEQLPSQPVPPTAAA
>Arab_Me14_ctg01_-_Arab_Me14_ctg01g599t1
MLDCIKLILRRIDACHASNPLLSANDAHREAIVAETRIYDQAHSIDDYESSIDEKVASYPPRFLQFPTPEDTKYVPTPGAISVGMYQNALYYREGLFSAIYKAPALTEDGYFPPGAPSRAKFVALKITSPSMMEPPHDSRREAEILKKAACPNVIPLLDTFREDGSRFVLVFPFVPLDLSVVLREGKFAKTQTKVWLKDLFSALAFIHEQGIIHRDIKPSNILLKTLDGPAYLADFGIAWAPDCSGSEAPDSKITDVGTTCYRPPELLFGNKAYDCSLDLWAAGCTVAEILDPNHATLFDSGELGSDLALLQSIFKKLGTPTLSRWPVSVKPAHQRDEVADTNKEAAKFPDWGKVQFYEYPEEHWGTLLPRVSEEGQDLVSELVRYESGARLTALKVLEHAYFRD
>Arab_Me14_ctg01_-_Arab_Me14_ctg01g600t1
MELQRKEYPAVLQALSPAQAVDILNGRMRHVNQLNTQIADWLQERRRVEEQYVQSLRKLANRHPPDDASELGIFSVPWQKIVSATGAVAGSHEHLARKIESDVERPLRNFYASNREVQAMGNISGNLAAMAKDIDSARKKSEKLKAKGAKAKPSEVGEAAQEEQNAELQWDSQAPFVFEKLQAVDESRLNHLRDALTQFQTHEVDQVERSRITAEETLNVLLNIETADEIQTWSLRLRSGDIPQPSRKMSNPPASPARNLVPPPVPSAAGPADDARSQKSGSTQEKHSSNPLKRFGTVLGRRRQSAHPYGRASSPEQKSSSNLGSAFGFGKGKNKDRDLPPPSTSDRPRSPLRRLSSRRESESAPSPVHAPPSRDVDEPNGFATAASNEIETIATPVNGTVQDSIPELNESLAPPPVAEPPTEPEKDSEGFSVPPSALDAITEAEREAGFSQSESNSTPQFKLDIRNAPIQEEGEDNDAAMASVVNTLRAQAAQPKRNSTLRGRRDVRNTIFVPNPAIPELQSIGEIPALPATGSAPSSATLPSPSTPTVFPPLIPPPQPSSPVSKLPHRSLLSDEHAAPASDTQSIRSGRSLSSSASTTVRHPDLHEPGLNASLVETVSAWFEQGNVTKAMVIGQVALAFNPIDISAGPFGTEQIRLENFSVLEKVAPNPAFIEQIPDNPGNYHVDLAKITKTSVAFHYQLHIENSNVTALAPIILTPLWRAEPTQVSAILNYSLNPQFDLRGASSVTVRNLVLVIRLEPGSRATSCQSKPAGTFSRDKGLIYWRLGDVTLSRDQPAQSIRARFLTEGEAKPGNTEARWEISGEQSLSLGSGLGVSLSAPGETKLDVEADPFADEDNAPPAAPSVQWKPVPSVKRITSGTYLGV
>Arab_Me14_ctg01_-_Arab_Me14_ctg01g601t1
MTREHQPPPPPPPSQSTDVTASSTSSAANPHHISPNAPPRPLLPRLPRSAAVLRRSPADDPRSPGPRPEDDDDENASATETETDMSEDEIAPGNDTVRVQARSDVVPPGKGSPDEIEIERLRSLQLKILQQQQRARMRNVSGTAGTPGLGARRVSPIKEEPLSAMSPTLEGAFASTPSPLPTGATVSTESTESTESAKTIRGSMPPTPAGHVALRTPSYPFPTVPGTPRWAASFHMPFTSLSPTVSAIYSREWAVPKDRIASESSTPAASTTPFAPGERGAFFSEAEDPRYPSPNLYELVLQLGIEPGLVAWWTAVTTIVREHYGAERATLAVPADASDIENVPWGQKMTYTATLGDHSPRAATYQEAAIKSHPIRVQQPTPQMEERPPPTTIPERRPKLFSHHSFAGHERQKAEAAFPESSAPLKPIRPRGPLRAVSHAPQTPLREHPLRQVSQASFDGSSSPFPSFTSASAHDPSFSDPDFSSVGGEPTSPKAVFSVLRALDHEPDALIDNTGVNRVLERGRLVTLTRDYSTSMSTSRENLAEKEKLEEGKPSAVQASAAGAEAQKAARSHGGLTAKSGNLATTLGLQPRYEEYEQYPTSPWAQSPAPSPAIQNDADANPFFATSNVDEDTFNPSRSPQDYTQYGVVEAIGVDRASTVIHIPLIHPSLSQVMHAAETSTPSRTSGLSRRQSMQSSQTSTPRVEDFVRKAPIAILSILSPVVPYPRNLTNSLKHLGPHLATSFSNAWQFTNAQVQVNSIRQRRAGGQGPVSTNISDPESLDDLLHLDLGDLSNSAPGSVTSPSDYSGRSKHSPGGSITGTPGWDAASLGFSSKHSISSTPGHLSGSDAVEGYFDAKKKMTSAPSQSKTSDKKVEKKASVNPVVEYFEDDIPTPKNEKGTKDEPSNTGKNAQHQRGHSLLHSYGADFGSSFQSLPAATTPGGRAPETPGHARRNSITETFEMPPPSESLLRTIIDSLPVQIFTAAPNTGAITWVNSKFLIYGGQDTRQVLQDPWESIHPDDRESYLEQWNKSLRTGQQLQKKVRLQRFDKCYRWFYVRVAPLKNKRQQIVHWIGTNMDFHEQHLAELNSARQQETAASEAKYRALANSSPQIVFVVSNRRGLTFCNSQWTTFSGQAEKEALVNGFLEYVHSDDVIKCKLPDIGEDGSANVPTSMPPEHSRHNSQNSSSSDDSSETDRTVTSPGSTPDKMDMPQAKLSKLASTGILKVAKDTDGRAFYSTEVRLRNKDGEYRWHLVRILLEKSLAEDSAEESWYGTATDINDHKLLEQTLKETMDAKTRFLSNMSHEIRTPLNGISGMVNFLQDSPLNAEQLEHVNIINASTASLLNLINDILDLSKVEAGMIKLSMEWLHLPSLLEEVNDLNMGLAIQKGLELNYLVEEGVPSMVKGDKFRIRQVLLNVVGNAIKFTPKGEIFVRCRLQSPERSGPLGENETMVRFEVVDTGRGFTESEAKYLFKRFSQIDASSTRQHGGTGLGLAISMQFVELHGGKMDARSVPGKGSTFFFTIKFGLPTPTDFPKPLVATPLTPATELSSIVPPLPVPQPSPYQKPAFPQISGSAQSMKLNRVSSISSEQSVRSPAASSAASIRSQDSPSLSSGSSDHSLTSAALTGKSSLRSERSSASSFLADSRITSPDPEINLSLPPKRADSQGTISTDSLTSNATARPATAPAHITSPLAQPPMYSILVVCPLVHSREATIRHIKNTLPQGIPHQVTGEESLIGAQRMLGGDSPVIFTHVVLVLHDTAEVHAIVDQIFSSVHYGSTFVVVVSDPSQKKELMKEASVYDYEQLNLDRRLQFIYRPLKPSKFAVIFDPEKQRESSTDRNQDTAQQVVVSQKLVFEELKKRLGGKGHKVLLVEDNQINQTVILKFLAKIDVTTDTVLDGVQCTDTVFAKPPGYYSIILCDLHMPNKDGYQACKEIRRWEKKNGYNRHPIIALSANVLGDVYAKCVEAGFNSYVTKPVAFKELSLVMTKFVDPVDPSKPPELMKLRKS
>Arab_Me14_ctg01_-_Arab_Me14_ctg01g602t1
MAVDNSLISLLATLTTSIQSATEALPRDDEILPPKEGISLLDVKNELLLSYLQNLVFLILLKLRARSSGGSDQLHPQDEVVQKLVELRIYLEKGVRPLENRLKYNIDKIIRSADDATRRTMQATAKPKARKSRNDTGSGSDASDAESAASDQTADSEDEMSFAPNRAAVIRAKAEVTSERARESAKDGIYRPPKITPMAMPTTESREARRDRRPNKSATLDEFIATELSSAPIAEASIGSTITHGGRHTKSEKERREENERREYEESNFTRLAPKSKKEQRKLDRGKTGGFGGEEWRALGAGIDRIERLTKKKGGNTKGSLEKSRKRPVEDGPRGSGSAAGDAFEKRRKIVGRYRK
>Arab_Me14_ctg01_-_Arab_Me14_ctg01g603t1
MHSLRSLCTYLLLIATAAVVMTANPTSSHIFSCTGGSLYFTAHPTDIFLYQNPSLFHELYVYKCVTTVVFTSGDRGIVGNHSRSLEQGMEAAYSWMSGDNETWQTSTLRIGESDLKLSTHSEAFNMQIVYLRLPDGGPAGRGYEVHNRESLRKLYRGDIETIATTDGNATYTLESLKDLVAAILLESNATNVRVLDYKTGVPDDEDARYAGSFARRFDSNLNGLSLDFKRKVAAFFKYAEYDEHMCQSYDECLKYLKDDVQHRLFQDHDVLYAAEALEREYYVS
>Arab_Me14_ctg01_-_Arab_Me14_ctg01g604t1
MCQFTYTHLECGHRKQDHIDTHLCEYFARKGIHCQPDNPKHRERGTTIITRKRNGICDKCIFEGGQKPEEDEKRREWEAKEQAAMLKEQQEAPIRDREAREAAERLQREETARLRKEEAKRKEDRERADHAEKARLAKEKARLAQEEADRKVAERLQKEEYDRERRHIADERAAAAERRRQEEEKQKKQEQAEEVRSRERRRQEKARLQEQLNKDVEAERQRIQREKAQKEAARRKKEEVEHQEELRRIKEEADRKRRQQAEEEEADRIQEEQAAARREKADREERERLSRRQAEDEEVERQRKAQLERNEALKRELQAEKDRKKQQQDAEHAERLAREKAEDDRVKRENEEMEQHLARQRASPERPATSPPPKPPFPTPRSPIDISKIVGNVGSPELSHFSIGGRRIPLHDSQKLTEHPTIPTSSPPPNFKPAPAPVARLGGTIYASPTDWTPQQAGVASTPSTPDWKRGFRPQAGSKSVPAPCEPAMDPVLQRRLDAQRRKCEEDEATHTTSPETPGANPVSTFTSMPTPTPCAPRASTSSTPLPPPPPTHSAAYANAPPKPKPPVKPKRISSATMSPVPAPRAVEQTARVRVDSAAADVSTSKHASDSGSESDGESEGGESAWDEPDSRVMRAQRLSQDKFGKQRRAGWSGE
>Arab_Me14_ctg01_-_Arab_Me14_ctg01g605t1
MASKLVPFACRSASRALRVQRPQWRAFSIFQPARSDSLMVHRDSPENNPSIPFKFSAQNEQLIKEIVSRYPSNYKKAAVMPLLDLGQRQHGFTSISVMNEVARLLEMPPMRVYEVATFYTMYNRTPVGKYHVQVCTTTPCMLRNSDSVMKACEDTLGIHHGQTTKDGLFTMTEVECLGACANAPMVQINDDFYEDLTYETTQSLLNALKHATETTGAQPGGPGLAGGSGAEQGSKGETALNSQGRGYAAGNVKVPSPGPLSGRQSCEPAGGLTALKGEFWGNETLRKDGALD
>Arab_Me14_ctg01_-_Arab_Me14_ctg01g606t1
MTTADDGNAAPSFRFKRRKTTHTKRARTDDEVTVSLDTQSPDAVTPPIAPEAAQDEDESVPNLKEIIRNRKRPRDRLKDVARRTEAPQTQLVQSEAPRPGQYTSRFIAQTGQVVDSSDKQMTVYVEARLAEQNYRQYGWPIPRHLQSTVAAIAPDLKHTFTLSATQATAASSTKDENIEHNSRVAAGQGKLQEVDLGSHAASRTHKDWKQLEGEMPAPKVRLGRDGKPRRGPKRRTSDDIRRDQMVEAVLHEAKLEFFDEAPVNPRFAGTDDDMVERFRTEYFESIEERQQRKPALPPGAKDQPKGPKLGGSRSARAAMRQQEELAAKTKR
>Arab_Me14_ctg01_-_Arab_Me14_ctg01g607t1
MPASVASAPVNRTSTKSAASRPKKAASTAGKKTQSTTNGASNGIQQHASPYTIMASRIANRVAEMAENMTFVERDRAPPQSEQKQVEKPAPATKKPPRKLEMRLPNSGASPTNITFSAPFLDNTLSKLLTLQNRMLTVSNDIAASEDVDDKTKQEQFAQSAELSRIIALICAEKARQGA
>Arab_Me14_ctg01_-_Arab_Me14_ctg01g608t1
MSPAIKKKKDDLGAGLRVSKDNIAAHPAGPPKYGELTQAERAFTLASTFLSGVLAISASQFLGAPLKLIDPQFYEGYMAYTKECFAILITCLTQWWAPTVVRVSGDSSMVGQLIQKKDGSLQCNFADRMVLMANHQLYTDWLYIWWIAYTNNMHGFIYIILKESLRNIPIIGWSAQFYNFIFLARNWEEDQRRFKKALARLNSATQPMWLIIFPEGTNLSATTREKSKAWAAKNNLQDMKHQLLPRSTGLRFCLNELKDTTEWLYDCTIAYEGVPPGQFGQDIFTLRSTFFEGRPPKSVNMHWRRFHINDIPIQNTKAFEVWLRNRWREKDYMLEYFQKHSRFPAENFWKDHLDMGDRSSQGSQSIRSVPRPAVQIETEVKSGNWNEFVKIFAPISSVMMALTVAYGANPADIIPGGKEFFEQHMKTLLGGGGEMGGLPSPDQLEKMIEGAAKLGAAQAADPQQVPQIAALTQENLAKLVKETAIKSGAVMPGGMRRASTALPQAPTRTLATPTAVPTRARSAVVTPSSARKPAGATTKPKPATSGPAKPKAAPIKPKAAAKPKPTPPTGPMKEITLASGVSIKVPAPAVEDAKKTGATTIKTANGLILQIGKKDVEKAQEKKGDTIMTASGIPIKVTSSGEIEVAKKPASAKSSPAPKPAAKKPAATPAKAPSKLNGTASAPKKLATPGPTKFAAKSSTSQAKVPAKLAK
>Arab_Me14_ctg01_-_Arab_Me14_ctg01g609t1
MAGFIQNILWNSVEGFVDAAKKTGGEYAGNALIKAGDMIEGGGRSVGNGIEKTATGYGSKLSGQTYQPSSASKALPSTARKPMVKRSNSMPANTRPSGSVAGGRSIAGPTSNVPLGAKKTVGGAKKAVGGVAGGATRTVGGVTGTATKTAGGVTGGATKAIGGVTGGATRGVNGVVRGTSKGVNGIAGGATKTAGGAISRGSKPLGGVVNNATQGVGGIVNGSSKPITSIGSNAQKAVPQGMPKPYDSTSAGSSYTNPYPTAKKAAVKPGMGKPFTPPASISSEPKPYPGTNTLPGQGSKTPVRRTYKPAQTLGSQVAPGQKMTHIGSF
>Arab_Me14_ctg01_-_Arab_Me14_ctg01g610t1
MTKFSRDADTPPASASEQDNEKSVAPSKIEDGTAQATASAASIDPEMEKRVRRKLDRNLIPLVSALYLLAFLDRSNIGNARIAGMEVDLDFQDGHYDWLLTIFYISYIVFGFSAIMWKVVPPHYWAAFCVFTWGLVSTVQAAANSWGAMMALRFIMGASEVAYGPGIPFLLSFFYLRSELGLRSGLFLSAAPLANTFSGALAYAITSGKPALAKWRVLFLVEGLPTVVMAVVAFFFLPDSPEKARFLNEEEKEVARARGVRQAGAATRLGAINIREFSTGLADPKGWILGLMYFSCNVGFSSLPVFLPTILKEMGFSSVHAQGLTAPPFFVSFLTVIATTYVADRTQQRGLMVASLTAIGGIGYIILATSHSVGARYFGIFLAAAGIFPAIGNILPWVMNNQGSDTRRGAGIVILNVIGQCGPVLGTRMYPKSEGPYYVKGQSVCAAFLFFCCFLALTLRTLFVWENKKLDQKYGTVGQQRLAMQEAAARGEGEGEEVAVENYGPLLAHTTSNSRALDRSRGEVELPPQACVRASAVSTRKDLTRPSKASCFGRTETWVDLQSAFLPEQDTRFQRPPPASCDATTTTAAPLEERKSSSRAQNHGSRVERQAKPQQALPVHGPRTFRHPSWVRGAPGPSERHWQFLNFSTSQLLHFSTSPLHHRAPSITCPGHRAAKPQHRSTAAEECSPHGRQPGYPRTPSAMASDPPRPAGPTPLIAVSGGASTSQQQAAGSSSAVGKKKKTHRGGKKRRNRRQSFAATADMGHGDASNDRPSLEDIAGHGNSRGSTSFYGLSRNLSTTSLESEALLDHRDHQPARTRRQSIPATSMYAPRASQQLNNSPGRLNVPSSYGKSRLSHTPVASYSDHDDADDADDRTPLMMGSPRDNRKGNNYGTGAPGVTPKKRRTSTASGKQRPAMFGHHSQSNLNDGYDVNNPPSVPASPVFEANPGLDDVALPIDLEHSPDPGRSRDALIDIDEPSGGSNPGSPKQGDFHRRMTQSFAADDDVCFPHDAMSELGQQDYLNDPTGEPTSRRRRRRWPDLDVLASWSHEEKEQRTMEGIRLRKVSEPLMVDGRLRPRQRNWHREADDAPFRFTYFNETFDNTIHSQTISELLQPGQSFRDLFVPEPVIIEDSSDDDSDAEDMPRASANTNGNSTTTTRSPSNTNDKVSSGEQTRTSTPRLQAEEPKAKGDGQQKRYGPRPAWWLDVMSPTETEMKVISKTFGIHPLTSEDILMQEQREKVELFKHYYFINYRTFEQDQSSEDYLEPVNLYIVVFREGVISFHFSMTPHPANVRRRIRQLSDYLVLSPDWISYAMIDDITDAYAPMIQSIEEEVDDIDEAILRLHNADDEDNSDSDEYDEKQSKERSGRDMLRRVGECRKKVMSLYRLLGNKADVIKGFAKRCNEHWDIAPRNEIGMYLGDIQDHIVTMTGNLSHYENLLSRAHSNYLAQINIRMNERQEQTSDILGKLTVLGTIVLPMNVVTGIWGMNCIVPGQDVENLNWFFGITGGLLGFGLLCYMIAKRVYGIV
>Arab_Me14_ctg01_-_Arab_Me14_ctg01g611t1
MGSDDIVDFEVIENSKENIQAIPSGRSARALAQLYTPPLGAKPGHAPSPLQSQDAHSATRLEFEKELMNIDDSDDPLDIYDRYVKWTLDAYPSAQNDKQSQLCPLLERATKAFQSSTHYKNDPRYLKLWLHYIRLFSDTPQEVFRFLARHSIGDGLALYYEEFAAWLEGAGRFSQAEEIYNMGIEREARPTERLVRKYGEFQHRLESRPQDVPEPSSPALPAIRPALAAKVDPFAPASPEPQAQSQPKAAKPKSGKPKMAIFSDEGEPARTSSSGSGKGWDSIGTVADRKKENAQEARPWAGETLKGGKTNKGAGKMMIFKDEVSSLPACPSSNIYDHRTNWLAFALCIQTKSYLEDETCKSHPLREQLQAVNPKTGRVEVVFVDLEQVYPNHEDPMSVEFSFEELRARHRGWLDRDWAAIRREEQEQARKLAEEAAAAQPPKPKPAPLAPKQEPLAPKQDAQKPPKPQTVPLKGGEDGVLADDDENRPPSQADVEKARAAKKARKEERANRTRKIQVLDVKEISGETQTIQAKLDSPSKKSKVRRKKSGREATMTLHTKEAMDDIYEIFNQPLKKSEEEAAEPQSEEISSDDDESDYTSGAESTATRSEFGDETTVGGDFTLGTVIGDNDSDDGSEADNTEIDNTDVGSVSAWSDLTESKDAAKASDEDDDKDDAHSDDGSENSADESFEEVSHPLVHTEEQNEPEVTTPTSPNAPASLPTRFLPIPPEDHDYPMRPYRDPVQAANNRLPFMTPIVEKTESSLGFATAYAQKEQLNAKTPSRSKGDLIIFEDEDDGEPGSSPYQDLLSQAIDGPGKITKLSLRESKPTMSEPVEERQRKPLAAKPAVFRDPKPTGPIIKDTQCNPVDEVIRNTILQEIQPPLDSYDGYFADTEAVSGKGLEIRKYTKAVSKMKNNAQDKTMTNLAAPPKLQFEGSDRTFTIKRELGKGAFAPVYLIESKLNDEGQDENAPVQMGKGEFGLKRQPLEALKMEDPPTPWEFYIMRQAKRRLGVCRASESIVHAYEMHVFRDECYLVEEFRDQGTLLDLVNIARAENGVMDEQLAMFFTIELFRTVEALHAKGIIHGDLKADNILVRFDALQKGEWDSVYQRDGRDGWASKGISLIDFGRGIDMKAFKPDVQFIADWPTTEADCAEMRELRPWTYQIDYHGLAGIVHNLLFGKYISTVAERGATLGAGATKTYKIKESLKRYWQTEIWHECLDLLLNPLMHMEGEEGRRLPVLKGMREVREKMEVYLEGNCEKGIGLKALVRKMEEAVRKR
>Arab_Me14_ctg01_-_Arab_Me14_ctg01g612t1
MTADLTTILLQFQPEAAELKSRQKYDQAARQFVIQLNGTSASQWLKGADTPQDILNPAVHSIAYAFALRHRIAAAVDKKSPPDSVQPGGALWNKAVLFLETFDPVQMRYAGHEWKRVVDYVEPLARNAGSPSLAIAPIRSAMIRLDPTTGTFTSTHVDLIRLCLETRSYAAAEPILDNYIHSLPSQIPAAVREGLEYSVPCADVARSGEYINRSSGHSGRVVFADVQEYYILGAMAYLGLRQFKKAHHFLEHVLVMPSANVANGLMLEAYKKWVLLSCLVSGEAKQVPRSANATAMKQVRCASKAYEAVAEAYTQLSNPSKLKAQINAGAQTWAEDGNTGLVKAVLDSQTRAYVLRLSRTFSAMPVGNIARSVGGSAEETAQYLETLITDGYLNGRVEQTDKAQAGMVLRFFLDPTQGPLAKSEKQQQQALLAQTQRTKALAGQVQDADYRLTLSKEFIENWKRQQKRQGASGDAMDTAWDDGVEEEDIMVDL
>Arab_Me14_ctg01_-_Arab_Me14_ctg01g613t1
MKLDSSFRRPSRTGSVSSSLRSASLSRSLREGEVADTTPTQPPPALPSAPPSAPPPAQPPAQPPAPPPPTSSPRPRPHSSAAHNGAPQLPSLPPTLLGATVHEPSSPTSASTANSPSTAGLFTPTLFAAVQPTDYFNLKPRTPLTAQRPPSRTTLDRALGPEPLAEPAILAPVDLDARHAPGPRPTRAPSATRPPTASTRPRRSASKDHRRSESRDTHPRSDSRAHHRSTSRDHARTESTSARLDDAHHDALPRSRERREKDKKTMLSRALQKANTAVLLDNAQNFEGAMEAYEDACKLLQQVMIRSSQDDDRRKLDAIRVTYTNRIEELRRLDPGYTHGSGKSLPARPMSGESLDEQRSMLLEDDDDDDQDDDQDDPDPDHDHNDHDDDPAVIQAATTTSIVNEPSAEHVPLKDPEPPPTQPLPLRKPEFTGQRESVISTAIRDVQRNMQTSHFNLQPPPGRLAGPTMPTRIESPMDRSYMPPPLSPKRSKSPLFSATLPKEPFDSHKLLQPQQPAQSRHQRVHSNESTSWLDTIDESGGSSCSSSIRSLPLSGVRRKHARNASGATEAEFDAALDAAVEAAYDDGFEPFDHDSLAPDGLLSTKLRNVELAKERVREAEREETIAAAKYRFKETQLQNETLPHVRESAELTLNDESEEEERLLDEMTREYMLDGFDFDLQTKSSLPRQSDSSGFSAYNSSLSSHRTTGGTSLSTVAEAMQPKSLPLHSPPSAPAPSGALPALPALPALPPPPPSGALPSVPELQAARLTDPEITPRPTSATRDTASVRSRRLSGQNAKTLKIETSLPTVSAPPHTEKPPVPAKNSPLDAPLLPKSAAATVFFSSTQTSLEPAFKAPAPPHQTGLVAPSPLPALPSPADSTATISPATPALPHTLSTDPGLAVPGSPKGAKPSALGIRKNKSSLSLKQRTLSTSSPDGSDASVGTPLSTTFSITGRKPSVANIAPLPTPGLPTFNLDGLPSGGMNLFESDIHSPFSPGSPSPAVANAPIPLEPCPDTYLLRPFWLMRCFYQTIVHPRGGYLSTKLFIPRDVWRVKGVKIKNIEDKIANCDLLTAALQKMASMDTLDADAVLEEMQAFEVVLDQVQTQLAKKLGNEVGVQSVSTMFKDATTVGEGASSGDGMRSMYSSQDNSTSRAVAQGKSYLSSWRKLRSKNSGVNLAALAGPKTTNGDVPKDSLNMATLPMTSLPSLRFAKRDTSGLTFDGPNSGYMSSLSRLFDSAQILDQIARQVEDPGLKHSSPTHVGLELSSRHAAEFFGFYICRFVLTDVTMLLDKFIKRGSEWVLV
>Arab_Me14_ctg01_-_Arab_Me14_ctg01g614t1
MPIALTYNEALLFHHFTTHLGRWMDCTNAARIFTLSVSEKARESPVLCHAVLCFAARHRRDDSTAEASYERCVNLLIGRLDGDSASYDDMLLAAVLLLHFAEQLNGKLPRAGRLDSLHLPLSSPHQLRLARQAPFERDFKYSPCFSEQFG
>Arab_Me14_ctg01_-_Arab_Me14_ctg01g615t1
MASTTSPTPAPAPAPAAVERKQQHVLAANTSGTLQVALQNRTSSSNVFAYITGLSINDGNKPIFIQADGRTVYSPPSPAQPLADVAADVAIPLGAPGSTVAVTIPKIAGGRIWFVVDARLTFFVNPGPNIVNPSVTNPSDPNYNLNWTFAEFTYNDAQLFANISYVDFISIPVALTLTTTNSGTLSVPGMGSDGFQRVVDEMRAQTARDGKPWDQLIHNSTNNTPLRVLNPTNLLATNGNAWSNYWDGYVTAVWNKYRNEDLTINTQAAAGNLTGRVVNNQLQLGAAGSFSAPSSSDIFSCSTGPFQTGQNLARDGVIPRLAAAFNRSQLLNTPGNQFPNGGNPSMYYQDVTTNHYARAVHAVQRDGRGYAFPYDDVVPDGGRDVAGTLHAGDPVVFTVAVGGN
>Arab_Me14_ctg01_-_Arab_Me14_ctg01g616t1
MSSSVFYKFKNSKEPERYAFDGNEISVFELKRAIIEASGMAKSTDLNLHIYHEDEPSKEYDDDTTTIPRTSTVIAVRRPAARGFSKIARYVSGKPPARAIKKDAAPVVAPRPSGGATETDAEAAFLAESAQVWDAQKESLSHAKPVYNKKKPVNVPNYDPPSGYVCRRCGVKGHWIQQCPENDNPDFKPVHCPKRTTGIPKSFLKVVDKSEMDEDAKGVMLNADGEYVQVMTDTKTWEKFQEKTQATKVQAANADAASKEVRERGLECPLDNRMFVQPVKTACCEKTYCNDCIESSLADNDLICPNCGEETLIEFTPDKEMEAKIRDYEAEKAKAKAELKAEKEAAAKEEMATAEAAAKAATEVENASANANVPQNETPVVPNEKEEPTSDSESKKRKSPPTEIQPPTAPKAMRQQQQPPQNTMEQDFIAQMEALKNMPMNMQQNMPNTPMNMMSSGMPSGMQMPGMNMGMNMNMPMMPGMQMQMPMGMNMPMNMNMNMPFHQNMPSNMNMQMNMMGNMNGNMNGNPGAGAGGFYGQQNGATAQFNDAYDRQPVNPNRQQRKKPRAPDYRYL
>Arab_Me14_ctg01_-_Arab_Me14_ctg01g617t1
MNERPGTIPSPATPHHPRRPPAHQSVSLRHSPAAKLDRAASTLTATCHSTTLSTSPNVPASDKANPPSTVSPRLQLNSHSSGESSDAAGWFDRTNNHDHVPHDASFVDNDPPFLLHNSSSSGRTPPEAQYMTAASVPYRPGLMKLGTDASSSEDFRSVIDDLTVANKKLKRRLRKYERVYDAHLQDDKLFEVKFHRLPDHKKKELEETLRKFAAGLDDASDMPEISYAHAPALNKEATGSSISRLAESGYVSMSASGQNSSTPSNNPSNQNTDNRKMTKSAYNRQQQSIQSYLHDIPRGLLSHGNAPLSDKAKKKMIVRRLEQIFAGKRSAPGSHPQPMQQEEVAQSAATADRREREAIGQGFRPEGLRTALIMPEQGDMKEGQSTPILHIPAQQRVNEQDFEPSGSGSGTGSPDQRPTRPLDLDPFRAQVPAANMDYFRHLGFSPPDMMTNTSSEQGHGWLYLNLLINMAQLHTLNVTPENVKEALAAYSTQLEVSSDGRKIRWKGGHEFSNNSSDGSPEQSGVNSPYQAMAAQGSPQNNPKPGHSASMESGYGGSEQWGRNMAPAGQETETSLFAYKPLFFRTDSSEEDRDLYDSTGSTISSFQPQQCGDLSGMGTVIQSNKPTKRRDDGPMIFYNKAKFCTDLTGDRVGASLTLPENYKAVTSHPLGALLNTESINGSDIWESRGPLEDAGTDVDSRKGTQTPSTGESIGFSPAGLQNHFGADSPDLMDFEASGLGGVQPDDNFSIRVQRSQIPSAPSDIQPNRRACLYPSKIQAILGEGATPQDARCRSSSPKNTIEEKMISAVRQNMPSSVLPPASFFPFDSASSGELSDDEDESSSGDYDTNDGPSTALQLLNIAPPHAKLASEQSGSTSEASEYSDDDDDDSSIDLLATARQQDPDTVRAFEREYDAAVADRLAEEIVAGSSAATAGGGSGFNSPASDAGDLSKQGSRRKSTQAAPSTTSANSLSPRSKHLKRARTTESLATVVKNGSKAPKSRRTR
>Arab_Me14_ctg01_-_Arab_Me14_ctg01g618t1
MSATRLPSTLLGTLRASASRTSGPILRQRCTYHSYDYAQPPLFAPAESKILSSAYAHVPHHGFTIDALKLGARDAGYLDASTNLFPRGVFDLINYHLVTQRLALRDSVQFAKEKDGRKLGVGSKVRALTLARLRANEPVLHRWQEALAIMAQPTYVPPSLYELAALADEIWFLAGDGSVDMSWYTKRATLSAIYSATEVFMTQDTSKGFAETEQFLDGRLRDLQTVGGLVGKLGCYPDAAACSRLGLSDHTTQSRTTRRLCTPHHHHHRHTAPCIDVAIDIDIDITIDITIDITIDITIDITIDITIDITIDITIDITIDITIDTAITPPPPPPSHHTSTEQSHTVVSRAAHMDVARTLPS
>Arab_Me14_ctg01_-_Arab_Me14_ctg01g619t1
MVRPKKAEVSDYERKRQENIAKTQALLHNLEMEAAQAGLGPTSKAATSAKPKTKKASAARKVKVEDVGPRRTSSRLKGIEADSEKAKRKAEEEFVAIKEADRAKRQRVSGAFNFGDITVVGKTWDQSGSFLRIVGPANPYERTFDFDDANETTDKDVKELRERMSGLQLWEDFEPNEIKITPERIYAMGLHPTEEKPLVFAGDKLGNLGICDASQKAAEVKVEDDEDADTEGPTITTLKPHTRTIHTFQFSPHDSNALYSASYDSSVRKLDLAKGVAVEVYGPQDPNEDQPLSGLEISKDDANMLYFSTLDGRFGMYDMRTEVMDAQIFQLSDKKIGGFSLHPQQPHLVATASLDRTLKLWDLRKITGKGDERGPALVGEHENHLSVSHAAWNSAGQVATASYDDTVKIYDFGNCAAWKAGHTLTEAEMKPSVIVPHNNQTGRWVTILRAQWQQFPRDGVQRFCIGNMNRFVDIYTGKGQQLAQLGGDGITAVPSVAKFHPSLDWVAAGTASGKLCLWM
>Arab_Me14_ctg01_-_Arab_Me14_ctg01g620t1
MKYAFAFAFAGLVAGALAGECYAPAPPAYSATASAPTPPAYSAPPAPSATPAPGPGYFAVISSRSASPVHLLSLTARGGKFYLGAGPPSSYCPENIGSGCPPGNDTIFAGGDGTLSLGVVVPGGQQVYVAKDGALSYTVPHSAYIPEGSVIDQFSKTAPGSNNLGTLNFETGFVACPVGGTGSGYQVYGQVDGFEASSECLGFSALTSASEQPGAWQY
>Arab_Me14_ctg01_-_Arab_Me14_ctg01g621t1
MPAIRFVASKQVKCRLATGTIQLLCHVKPGASANREGITAVTDEIIDVCVAAQAREGEANTAVRTVMAKTLKVPKSDVEIAKGTKSREKTVAIQVGPNVTPTEEIERIRALLSSSVAQ
>Arab_Me14_ctg01_-_Arab_Me14_ctg01g622t1
MSAAPTIQPKFLPSRQDVGVVAVGFSGGQPKAGVDAAPMALIEAGLIKELEEDLDLKVTFDGQVHNYAELLPAEDPDYRGMKRPKFVSAVTKEVSEQVYNYAKTGKLVLTLGGDHSIAMGTVSGTARAMRERLGREIAVIWVDAHADINTPETSDSGNIHGMPVAFLTGLATETREDVFGWLKAHHMLSTKKLVYIGLRDIDRGEKKILREHGIKAFSMHDVDRHGIGKVMDMALAWIGSDTPIHLSFDIDALDPMWAPSTGTAVRGGLTLREGDFIAECVAETGSLIALDLVEVNPSLDEVGANDTIRAGNSIVRCALGDTLL
>Arab_Me14_ctg01_-_Arab_Me14_ctg01g623t1
MRQLPSSIRQLIVRHAGCTTFPVVTTRQLSHAAPRPQLGALANAHLSRQQRSITIQQLDTGRDNRERVVILGSGWAGFTVARQLDNKKYQTVVVSPRSYFAFTPLLASTAVGTLEFRTALEPVRSRRTKVEFVQGWGDDVDFKNKTLTVEQAVDDPTQGLALTQDRHAGETQEQRALEKKSDVEKGRTFDLTYDKLIVTVGCYSQTFGTPGVKEHAFFLKDVGDARKIRNRLLACFEAAALPTTPDEMKKQLLNFAVVGGGPTGIEFSAELHDLINEDLAKIYPELIKYHKITVYDVAAKVLPMFDEKLAGYAMDKFKREGIDIKTKHHVEELSLGSPFERNNLSSEKDHRMFTLKIKEEGEIGVGMCVWSTGLMQNPFVHHALSNVRAVPDNLRLVESAGDPSFAKDIAWKVKKDERSGSILTDDRLRLKVVPQGKNDKHVVAVVDDVYVLGDCGIIEGTSYPATAQVASQKGLWLAKRLNKQDLDKAGFKFKDLGTLAYIGNWDALFQGGKWGRLQGYIAWAIWRGAYLTRTVSWRNKILVPVYWAVNWLFGRDISRF
>Arab_Me14_ctg01_-_Arab_Me14_ctg01g624t1
MPHHKNLAIHPASFRSSHLSIPPSPFSPRSPLTPVPRPKKHGHATGINTTAISTQPPAPNSPLQWVWTCHACTRAYPLGATRRCLDDGHHFCAGTTTAKSWRKDGSRKQVRRRRACSSEFDYLGWKDWGRWRRSQPARRSVGRPIQPLILDTGDEKEKNCWRNCDFPSQCRWGKQAGIHTPTPTRVEFPASAPSSETWACSAPMTDMPTLADCFAAEDNASNAEHRTGTGTDADADADAGALGRLLRISFKQRKRSGLTPSSPVCISTADEAVDIEMCAIDTTAPIPEPHGSCIDPSLLVLPDPAYTSTSTSTSTYTSTSTSTYTYTSTPTPTYTYTYTYTCTPSPTNTSLAPSTRSTAPPSPSPTAAKPSTTIQRSRARFSSGRTASPRQTVFPPVADWQRRAKDCGAGAPVRVVTREPRFESEVVVDEGSALERVGRWTERVVNVG
>Arab_Me14_ctg01_-_Arab_Me14_ctg01g625t1
MRSTTLSALAGFAALAPFTAAQSTSSKRGLCHVPSQKYPGDDSIWISGGSDLTWYYNYQAEPSDAYKNKNIQFVPMLWGAKDSDTGTPFYDSVKSQIDGGANISYVLGFNEPDGTHTTGGSALPVDLAAARWIAEIEPLKKLGIKLGAPAVTGGASGWAWLQNWFTACNGSCTPDFIPVHWYGNFDGMASHIGNVMATYPNMTVWVTEYALPNQDLKTTQDFYNTSKNSMDSWGNITHYSYFGAFRSDVSNVGPNAAMLDQKGKLTDIGSWYMGGVATNNIPKGAGGRIQTIGLPVASVLALFWACML
>Arab_Me14_ctg01_-_Arab_Me14_ctg01g626t1
MKFHGSYSSMLAPFLLLASAPLGVLAGDVLKTNGYSSCLTGNSDIKVNKLDIEFDRSTKKVKFDVSGTNAKEQKVMATLQVNAYGRSVYSKTFNPCDTDTKVDQLCPVPAGTFGATGEQSIPESYISQIPTIAFNIPDIDSQAKLELKSIDSNEELACITSQVSNGKSLSTTGVQYVAAGIAGAALAVGGLSALASAGQAGVAHSSPTFGDVVFWFQGMAMNGMMSADIPGVYRSWSKNFAFSTGLIYWEGMQSSIDGFREKTGGNLTTDSVKFLSNATLVHVDQNMTVSKRSFDGISDVLLWARDDLSTNINGTEEATGDSKVVHAVKGIQGYVEEYKIPNGNTFMTVLLWFAIVVAAITVGILLLKVILETWALFGTFPKRLTSFRKRYWWILAKTITNLILLLYGIWTLYCVYQFKNGDSWAAKTLAGVTLAAFTAVLAFFTWKIWSIAHEFKKMEGDNSRLYDDKEVWRKYSIFYENYKRSYWWIFVPAIVYAFARGCVIAGADGHGLAQAAGQLIVEALLLCVLLWARPYSLKSGNWINCTIHVVRVLSVVCILVFVEELGMTQTTKTVTGMVLVVVQALLTGVLAILIAVNAIIVCCKENPHRRKRKEAEKARDLDNLTPLDARNSLLMDPQEYKRSSLPSPFGPRAAGYDVVPLAEQNTAYNNGRRFEEDRGHLLADASTFGRTPSHNTSLSDDRDRSNSPQPRLPDLEFGQQTGYTQPNNAPWQPQRGNQGGYAY
>Arab_Me14_ctg01_-_Arab_Me14_ctg01g627t1
MAKLSLLLAVSQFSLVYSLPANDINRQPEIPDERAITISTNLDATTSYSTAIESLQTATLTTRPSLTGSILTALPTGGGITKDPANLPGITATFEPLCPEETPLVPGPTSPAGLPSADIFVPLATGVPAPSIPFRNDHVVQKQNIVDGNVPIQTNKFYANFFLGSQQSPVWTHPYSLSWAKGRGGSYGMAISHTERSQFAFGPDTNNPQYFISPIGIQQMALSAAELQAGTAMTIENLKAFSVYANFAPSAGSRVVMSVPVVQGMGFITSVYDNCQPMISSGVFFRSLKYAGQVNSVTFKYNTQLEDGSQWLIYVTPLAADGVPPLTLVGGGSIRGPDSFTGLIQVTKNPSGQDGERTFDGSAGSYAINATISGAVNGPSGSYTLSWTKGGVLSQPLVMYALPHHVESFDQETRGAMTGIQLITTTKGAATAVQADRFTMIEPDLPTTIGFAPWAKAANGAQGGTGNINVGASALQLLNTAGTTELRQDFIAQTSLNSMYYSGKGLAKFAGIVYTMQTMAGNSNLAAAGLEKLKDAFNVFANNTQPEPLVYDTVWKGVVSGATYRSPTKDPGLDFGNTLYNDHHFHYGYFVYTAAVIGHLEPAWLDQGINRQWVNTLVRDYANPVTDGYFPFSRSFDWFHGHSWAKGLFESGDGKDQESTSEDTFATFALKMWGKISGDANMEARGNLQLAVQARSVRNYFLLKSDNKNQPPSFLHNKVTGILFENKVDHTTYFGSNIEYIQGIHMIPLNPSSAYTRPKDFVTEEWNTFFSNGRVDQIPGGWRGILYANLALIDPQTSYNYFASPNFDYGSLDGGASRTWYLAYSAAMLNVGSAVAEPGLTLQYPPQQQEPPQQPYQPEEPVDGEPQPQDAPQEEPIPPQPTQEEPQQEEPQQVPGQQPQAPPQQQQPQQGVAHAVDLTAPAPARVPAPAEVASQDQSADSPYSNDPSFEWADYAPTDGDFTAPQQADQDQYRNPYADDPSSGWRNYFNDYRNNALHGADAPARYPWDMKSRDYHNRVATNGADEDEWEDVLDCGDEGDASQNEEQGREYM
>Arab_Me14_ctg01_-_Arab_Me14_ctg01g628t1
MSGHATATLCWRAASLRAIACSTARQLPPRPIPVSSHIRFDSVMSGTQHPHEPPPSYEAATGPSSSSEPTPGLSRVSTDGPGARTERNGIPMERRRSMEDELRELPPGWVRTFDPESHHQFFVDTTADPPRSIWTHPYDDEQFLSTLSPEERKKHSRMKRTVTLQDLAAEDSDDDDAHAPRAARGKSAEPELKGFHKFSRKLKDKVTGSTHTEREQQRVRRAEQERQAYQAHLRARQALIRAMETGEPQFLCKDHQGKDVYVTPPNGYAPRGAYGYNPYGNPYARGAYANPNVRYMRPAQPYGRPYGYGYGGGAGLPIAAGFLGGALLGGALF
>Arab_Me14_ctg01_-_Arab_Me14_ctg01g629t1
MPTRLSNTRKHRGHVSAGHGRVGKHRKHPGGRGMAGGQHHHRTNIDKYHPGYFGKVGMRYFHKQQNHFWKPVINLDKLWSLVPAEKREEYLAKKSDKAPVLDLLSFGYSKVLGKGRLPEVPIIVRARYFSAEAEKKIKEAGGVVQLVA
>Arab_Me14_ctg01_-_Arab_Me14_ctg01g630t1
MLANNTRNAFAAVSKRLYICQSCLRRSKQLLLAARHLPTRPPARSLQTASQSPAQDDTPFRKALKDAAKQQKKASKGGKKPQKATDPRLDKWELTVGIEIHAELNTARKLFSSAATSISESPNTHASLFDTAFPGSQPRFQTETLLPALRAALAFDCTIQRKSSFDRKHYFYQDQPNGYQITQYYEPFATDGHITLHAHDFPAGSAPQDCPIKIGIKQVQMEQDTAKTVQQPPSTHLLDFNRVSHPLIEIITLPHIHDPLVAAACVRKIQTILKTVDACTAGMEMGGLRADINVSIRERGQPSSEGGLSYSGVTGLGQRTEIKNLASVKAVEDAIIAERDRQIELLENGGAVEGETRGWTVGSKTTKRLRGKEGEIDYRYMPDPDISPVFIAQDLVDHLRANLPVLPDRIVSVLVDKYGLSTKDAGTLLSFDNGDRLEYFFEVTNQLARARNIRPSDAEFLVLGKAAGNWVLMELGSLFKDEDWSATRVPPEVLVCIVSQLLQKRITSRSAKRLLSMKFEGDERHVERLIEDHNMVLRPLSPREYSDFAQTLLDEKPDMVRDIIDKGHEKKIKWFVGQMMARSPEGTVEADVAEQTIKELLAVSKTE
>Arab_Me14_ctg01_-_Arab_Me14_ctg01g631t1
MTASNTAPADRRERQRNARAIRRGLAEITPGNSSLQTQSLLFSKLPAEIRFLIFQFLLSQAHDHNRPISIHSISPLYRPGHAYRTKIDTAILLTCRIVYYEAHAIPIRSATHHFRHLGSTSWLYEGDVWLHHMTKQRGADVYHLHDNLVALNPRNFTKFFLPHLSWKRVTWTICAYLWPPILAGYREIDRLAETLACVGLPVSCQEVNLELEIRKDVPEFRESLQQQANLCQKIGFVTGESTQGQVHTAQPAGLRRSDGSILPFDATNSKQYTWVGSGQARWGTSALIMEKETVKYRTIRLCWRARVPRREYMSYDYMNCLDLNNCEEVEGIKQGGLDDTSLRSPATHH
>Arab_Me14_ctg01_-_Arab_Me14_ctg01g632t1
MQDVVQKHHPEVNNGSLPAELNKANASATQSKMVEHLIEFVKDLRPPKAVEGRSDTKGKSKAASAALLSLGDVRRSRDRTTLISVYLPVSCIDSQIAHFYCVEDGSLACSEVAEVNCSYLTNSTGSISWVLVEREASLLNDINPELGFTRSLFLSPHPRQGNPIYSQGSLLTALDDMGPDRDLVFTTLPVGSVEVIKKEDQQPVPTIEPPRTTGGSQPTASGSQPHASSQLPQFHASSQPPQPTGGSQPHASSPPPLPKRQPTGSSQPLQPTGGSQPPASGSQTFCTRSRMSSSSLPKLRASSWSRPSMMFLPKRAPRAALLTCEPDAGEAGGIVASANPGDWHPTMEGRTYFPVRGAKREEQKAVVEELWEVMGGRRFVYADTKAPKDGGISAAATD
>Arab_Me14_ctg01_-_Arab_Me14_ctg01g633t1
MSYSWIGPPAEFNGTNEITGGDSLTENLNQWYDAGDQAYILVASAMVMVMIPGLAFLYSGLARRKSALSLIWACMFSASVITFQWYFWGYSLAFGPSTNGFIGNLDKFGLKGVLGAPSPGSPLIPELLYSFYQMQFCAVTAAIVVGCVAERGRLIPMMIFIWLWATIVYCPVAYWAWNSNGWFFKWGGLDYAGGGPVEIVSGCSALAYSMILGRRQEKMMLNFRPHNVSLITLGTVFLWFGWLGFNGGSAFGANLRAVMACWNSNLTAMFAAMTWVILDWRLARKWSMVGWCSGVISGLVAATPASGYLTPWGSVILGITTGIVANFATKIKFWIRIDDSLDVFAEHGVAGMWGLFLNGILGADYIIGLDGVNNGLTAGAITGSPEAIYKQIAYIAACTAYSFVVSAILAFVINKIPGLHLRASEEAELLGMDDDQLGEFAYDYVEVRRDYLAWTPAKGEPLNGEHSVPQGERHGIPQHSEMLEGKTPSEHSGHEHTGIAGDRHAVAMGPEHEKTTPPSSSRDYA
>Arab_Me14_ctg01_-_Arab_Me14_ctg01g634t1
MVLSFILIQNRQGKTRLAKWYAPYSDEEKVKLKGEVHRLIAPRDQKHQSNFVEFRNMSKIVYRRYAGLFFCACVDTNDNELAYLEAIHFFVEVLDAFFGNVCELDLVFNFYKVYAILDEVFLAGEIEETNKQVVLTRLAHLDKLEHEIEPPPRPSSATDHQLAADPVDAQPSEAGPAPTRPRHQHPRGAIMSDFSTRPAQAQGPPNPNAPPRTDDPTRWRPPVAASPAGYSQGGSPYTHGGSPYPQGGSPYPHGGSPYTQGGAPQHGSPAQQQQQQQQEGYFPPQASPPSHHGDPNVNQLAAQMGGVGLGLGGDAPPDHRRKKKDRHAYHNLEGPGGSAPAFHGLPQPATPSQYSPQVGGPQWQEPQITPAMSQFPAATPLFTPGAVASPMQHAARAHTPQPGTAVGSAQGKVDPESIPSIPKSRDTPAKYYLEHVYPTMEHHIPPPATVPFVAYDQGNSSPKFARLTLNNIPVSAEALAATALPLGLVLQPLAPLQEGETPVPVLDFGETGPPRCRRCRAYINPFMQFKAGGNKLVCNMCSFPNDVPGEYFAPTDASGARVDRLQRPELTLGTVDYLVPKEYWSKPPVGLRYLFLIDVTAESVERGFLDTFCAGILKALYGEASDEADATESAVKISQGAKVGVITYDKEMHFYNLSPKLATAQMLVMPDLEEPFLPFTEGLFVDPLESKTVITSLLTSLPNMFREFRHPEPALLPTLNSAVAALTATGGKIVCSLGALPTFGPGRLFVRDDGNVHNNDAERKLLKTEHPGFTTVAKKMVENGIGCDFFLAAPSGGYLDIATIGHVSATTGGEVFYYPNFHSPRDDLKLSKEITHTVRRETGYQALMKVRCSNGLQVSGYHGNYFHHNFGADLEFGTIDADKAIGVLFSYDGKLDPKLDAHFQSALLYTTASGERRVRCSNIVASISQSAGECMKFVDQDAVINIIAKEACARMTEKSLKDIRGALTEKTVDILAGYRKNFTGNSPPGQLVLPENLKEFSMYMLGLIKSRAFKAGKEPTDRRVHDMRLIKSMGPLELSLYLYPRVIAVHDLDPADGFANENGHLRMPSGVRASFSKVDEGGVYIVDNGQICLLWIHQHVSPNLLEDLFGPEHNSLKALNPFASSLPVLDTHLNAQVRNILQYLQGSRASKALTLQLARQGLDGAEYEFARLLYEDRNNEAQSYVDWLVHVHRHIQLELAGQRKKNDDSDNSNTGSQFVGLRTPYWG
>Arab_Me14_ctg01_-_Arab_Me14_ctg01g635t1
MVYTGKPSRGCGMCKSRRIKCDEKRPTCGNCRKSGRDCPGYPDEFDLVFRDENKAMARKARKTSGPTPTRCTPDGLSAQASPNQPTFFTFEVSNASTSQEESTTAQATPDSEQQLILIPQYPEALSSQGLFDNWLWNLDRIPQSIAMAPDYEAVTFFFKNFITLPQQAESTRGYLEFLVPLYNQALPSSVLHLATSAVAMAACGQYPGREALVGEAVKTYGKAIRKLNTDLKDPAMSRSNETVLAILMFSLYETIMSTDDTITAWGNHVDGAVALTKLRGTDQFNDPMSHAMFRAVRTMMITSCVQRSKPIDTFPGQKGWVGESDIAEENAANRLTLICIDLPNLRARANKLTSTMYDPAEESEARQIIDFAQLVDGNLEEWYRTLPPEWKHRIIGIESTIPENIANAEKWPGEQHAYHDVPLASIMNDYRVCRIFCRRVMLACLDWLHFGGFADEQGQYAQSVFVVQQMVDELSACVPFHLDYELQPLAKETGQEQYAAEAFGGYSLVWPLYVAANADTVSQRQRDWLLGRLSVIGTKFGLSSAQGTQAERKRGGFHIGYEGDEEFNGVQRRTGSLSR
>Arab_Me14_ctg01_-_Arab_Me14_ctg01g636t1
MTLFDDHLLSPVGIMYSLGILFASVILYAISTIVYNLLFHPLRHIPGPWLAGSTPIPYGLQMRSGKIVTWIQQLHAQYGDVVRVTPTEVSFISGETAWPEIYGFRTGEYKDTGAYLKDNAWFPKPINGVWSIINSNEADHARLRRNLSHAFSDKALRSQESLITSYVDLLIHKLSEHAENCAPVDIMRWYNYTTFDIIADLSFGEPLYCLRDSEYHMWVNMVFSSLKGIPTIAIRNKYLVFRWLDKLRGLFTDTQVAVRARKQFFDMASARVSTRLEKETSRPDFFTFILQNQSHANRALSRGEMDTNAVVFLVAGSETTATTLSGTTYLLLKNRTAYNRLTTELRTAFPTASSITLDAVNTLPYLLAVLQEGLRYYPPVPTGFPRTVPGAGQVISGHFIPGGTSVYVSQHAANHSARNFADADAFVPERWLAGERGDKYEEDRREVVQPFSLGPRNCLGKKYVVFFFAFAFAFAFAFAFAFAFVFVFAFASFSSPLAYAEMRLILAKLLYTFDLELVQPEREWMEEQRVFALWEKPPLAVRLTAVRR
>Arab_Me14_ctg01_-_Arab_Me14_ctg01g637t1
MGAFNLVPLAVLFLVVGGVGWVGYQIYLYSNELAERGVRKMEKKNVVFTKDGARVGVKEVSAEQYADKTQKAFVKTWNAAQDSPQTGNSVRTRRA
>Arab_Me14_ctg01_-_Arab_Me14_ctg01g638t1
MDRLERLLSRPTAKPYKSRDIEASEEVYLNDDGLLEFGPDDIENPKNWSTARRWYITVVSVVLVVNATFASSSPSGTLDGISKDLHVSTEAAGLVITLFLLGYCAGPLIFAPLSEFFGRRWIFYITFTLYLAFNFLCAFTPNFGGLLVGRFLTGTFASAPLSNAPGVLADIWGPLERGNAMAAFSMMTFIGPSLGPVISGFLELKEDWRWCFYVLLWLGGVTELLMFTIPETLPTIVLRNKAKRIRALKIPGHEDVKAPVEVTDRTLASMFRVSLTRPWRILIDPISFAVAIYLAVVYALLYMLFTIYPIIFQQKRGWNSGVGELPLIGTAIGAVIGGGIIFANTARDKKKLESGHKSVPEDRLPVAMLGGVMFPVTMFWFAWSGEYNSVHWIVPVLAGVFLSTSILLIFVAYLNYLTDTYLMYAASALAANTVIRSAAGAAAPLFTEYMFEALGVGGGGSLIAGIACLLAPIPFIFYKYGGPIRERSKFAPTPPKAAEVKEEARGD
>Arab_Me14_ctg01_-_Arab_Me14_ctg01g639t1
MEQNGAQSKRKQPPTPSNERPMKQIKAETDVHSRNGVATSPTPEMDVDDAHSDVSLEPIPIVPVAGAVHDTAEWQKTIEGVVKSVVSIHFCQTCSFDTDPAIASEATGFVVDAERGYIMTNRHVVGAGPFIGYCIFDNHEECDVYPVYRDPVHDFGILRFDPSKIKYMPLTALQLHPDLAKVGVEIRVVGNDAGEKLSILSGVISRLDRNAPEYGEGYSDFNTNYIQAAAAASGGSSGSPVVNRDGFAVALQAGGRSDGAATDYFLPLDRPLRALELVRQGKVVSRGTIQTQWILKPFDECRRLGLSADVEEAVRTRFPKETGMLVAEVVLPQGPASSKIEEGDLLTHVNGELLTQFVRLDAILDDNVGQTISMTIQRAGENMSVELDVGDLHAITPDRFVSVAGASFHDLSYQQARLYAISLKNAGVYVCEAAGSFRFADGYASGWLIQEVDNQPTPNLNAFIEVMRRIPDRKRVVIMYKHLRDLHTVNTSITAIDRHWHAKVRVATRNDATGLWDFKPLADPVPAIPPVPRRANFVKMNSQYPEAVDIVRSLVRVHVSMPIKLDGFPKMNKQGYGIVVDAEQGLVLVSRAILPYDLCDISLIIADSIFIDAKVVFMHPLQNYAIVKYDPSLVQASVKTPKFATDFIKKGDETIFFGMNQNFRPVVTKTVVTDITTVAIPASAITPRYRATNFDAITVDTNQASHSGSGVLIAEDGTVQALWLSYLGERTSHSGKDVEYHLGLATPNLLPVLNEIRGGKTPKLRILNVEFQTVQMSQARVMGVSEEWIEKTEHADPERHQLFMVRKVDSGHGDGLQEGDVLLTLNGELVTRSPDLDVMYTNEFLDAVVVRKRSELAIKVLTVPTEDLETDRLVSFCGATFHRPHQAVRQQISKIHSDVYISSRARGSPAYMYGLAPTNFLTHVNNKPTPDLDSFLEAVKQIKDNEYFRLKVMTFDNVPWVATMKKNEHYFPTIEYVKDKSEELGWRKIIHECDDGGAREEAVDGGEAEAAEGEGCDE
>Arab_Me14_ctg01_-_Arab_Me14_ctg01g640t1
MSDTEPKTPDKGAATGAAWTDTEREMDQQAPVPGGRNVNACRKIIKKLKEKLKDDIDNIKAGLPVAASAAEGDAATTTPIKATPRKRKTNGGAGGEESLKKATPRKKMKSEAIVRDEEDIKT
>Arab_Me14_ctg01_-_Arab_Me14_ctg01g641t1
MGYDCSIIENISDLSILKDHKPAADDSILNATDGSRSYYLQGNSSMVIVQNQTDPLRTLWATNAYAVLETAQQMWPSRDIFDRFQGSSPNALFTETASCYFNKNESPTGDYPGINQQRIFETLLWQKVLNTSYGDGAPPQYNFSIDHNITELYGAYDDLDLEYNIPANFTDTCPHQPMTATGVQCKSSSSVGTADIEGVHSTYSNFARTDTPINTQRYRRADRFGAKTLTSMNPGRSTDDEWFSNFFTSTAAPPLFYAPYSDDPDSVDEGVGYMLKDGYPQASQLRQSMLRAHAAYAVQLMYNGRQGFTARDDNHVILLNPNITCFNAGTVIKQGIIPAGVLVALFFL
>Arab_Me14_ctg01_-_Arab_Me14_ctg01g642t1
MSISDNSTVAVPHEGEGAYDPLNESDYYSQPRDTVLDKSPYAECEIVLLDAGTSATRFLVHSSMIRKSAPLFALASKGQPVTLSKLDESAAHTLVNYLYTGNFQTLLSHEFSDDDAAYEGFKLPTCVYCAAVRYQLPGLAELSRQKITYAGQRLPIFDILKIARDHAFPLLPEADRWYSEYLENTVHDAMSQDPEPFRRPDFITKVEGNSRLLQIVWKTVMSNCAAVIAQVSGELQLENGAETPMADSPFVESEVATQQSFHQLPSPTESVLDSPLPESAQILLKEPEHLDIVLSASESVRNSTVASSSEADDSNAQIDTASNDNFDLPAIEPTIDHHENMDTVKAKREGVKKYGHVRADSVLGEEAVLDKDSDDAKRGGPVEAIPAAGNGNHDTPKKEKKKSKKKRSSIAF
>Arab_Me14_ctg01_-_Arab_Me14_ctg01g643t1
MSDNIHGVIAGLQTSFPIAMLMAGLLAVSFFSVIELTVWTLSTFQRWKGLYFWSLIVATWGIAFNSLGYTLKFFQVTTANLFSVTLIIIGWICMVTGQSVVLYSRLHLVLHNHKKLRCVLIVIISNFFACHVPVTALVYGVNSSNPSPFLRPYDIYERVQLTIFACQEALISGLYIYYARGFLHTARHSRYQPRNTLMFQLIYLNLILMALDVALLGLQYTGFYEIQTSLKPAIYSLKLKLEFKVLNNLLRSTEDQSQNLEAYTGSNSIPP
>Arab_Me14_ctg01_-_Arab_Me14_ctg01g644t1
MNHSSKTPEEVAHPKALNATTDVNMTEAPVTWKAYLLCAFASFGGIFFGYDSGYINGVLNSPLFIEEVEGPICPQGLATPNGACAISSSNTSLIVSILSAGTFFGALAAGDIADIYGRKWTIVAGCIIYIIGVVLQMAASGRDLLVAGRAIAGIGVGFESAIVILYMSEICPKKVRGALVSGYQFCITIGLLLAACVNYAVKGRGDTGEYRIPIGIQFAWGIILATGVACLPDSPRYFIKRGHTEKAKVALMRVRGVHPTDPASEHLRAMVDFELAEIIANEEYEREQTPAGGWLAGWTNCFKGSLFQSNSNLRKTILGTSLQMMQQWTGVNFIFYYSTPFLQSTGAISNTFLISLIFTLVNVCSTPLSFYGMEKFGRRTLLLYGALGMLICQFLVAIIGVTVGFNKSTTFADGTTRANNLSAVNAQIAFIAIFIFFFATTWGPGAWVLIGEVFPLPIRSRGVALSTASNWLWNTIIAVITPYMVGTNEGNLRSSVFFIWGGLCTIAFVYTYFLVPETKGLSLEQVDQMMAETSPRTSAKWRPTHTFAEASVEKGGAARLEGGQVFMDTEKVLRTASIH
>Arab_Me14_ctg01_-_Arab_Me14_ctg01g645t1
MLSLRLLLITSLVWATAALKVSKDARCGRKFDATCQGSIYGGCCSNYGYCGSTKSYCAVENCQPGFGSCNGKQAGTTMNTIVSASCPAAKPTTVTITSTTAKGTITKSLTVTVSGATSTCPAAGKTTITVPTTVTQSAVASTSTTTTTTTVAGADATTTLTLPAVTSTETLPAVTSTQTLPAATSTETLPAVTSTLTLPAVTSTETLPAVTQTMTITSSLTLPASTVTSTSVRVLTVTLIVG
>Arab_Me14_ctg01_-_Arab_Me14_ctg01g646t1
MLIRLLKIPRSLVLLLAILAFFTWQLSQGSSHEPTDASPRAPGKANKKTARIALMTFVTEQRSYLHLSLKNKDHYARRHGYDFVVDYEAHNDRTVMFWKFDMAEKLIKSGKYDWLWWIDFDTLITNTATKVTDIIEDELRNATNPDDIDFLLTHDCNGLNAGSFLVRGHERSLKFMHKSVAVYDEAKRKDVSMSEQDAVVKLLNEDKKSANRARVIPQWKLNAFPSEIACFDEEQKVWEHGMFVLHFAGAWAHVKGEDPTGYLMNKYEGDIMWGDWKEFY
>Arab_Me14_ctg01_-_Arab_Me14_ctg01g647t1
MQICVPCNRSFGSETALKQHQQDSPVHAEACDCKPCNRSFGSGSALEQHQRNSPAHAETFDCKPCDRSFRSTSALEQHQRDAPVHQNAGIPAAVPLPAAPTSPPLLYNNAHSPRHAPSAQTSAHAPGQRSKYKASRTSYTFSELHELIAHAVVPDLPAPHFHPPSARFKNERATNVMGNFLCTYRKCPKQSWGSKIVAIVIRGYANNGYSAEVFGQRCKSCDRLGALTLDVQSYVERVAFRLKTWAGVRMEEPPFEKMKGPPHESAFCEGCARGGKGILCRLPMFIHVDRDHTEGLCDTEPMGVLADCIDLSDSPKLCQAPDQEADRATAPDANNMTFTHFSELTTMPGGRRYICKTKQFLSRLVLGSFGTD
>Arab_Me14_ctg01_-_Arab_Me14_ctg01g648t1
MAEYFKNPPPGLDLTESRTATGNIVGIVLFISAFVFVSLRLFTRLRLKREPLGLDDYLMFVGLALNGANLAFVVAGGRYGLGKHIWSLQPFHMRKISIITFIYVFIYTWSVCIIKFSILALYRRIFGLSWLGYCCFGLTLLYLIVNHVVLPLYTRPLSYYWEQWYGAQGVLLVNEAKFYLGMGIVNLFGDICMLAVPISSVLKLQMERTQKVAICCMFLLGSFVCFASLYRIITILRLVSSRDISWAKSDVFLWSSVEPSIGIISGCLPVLRPLMTYILESWFRFVPEVRTNSSKKSKSSRNFTLNPLETISKKRTRKIKKHDLESTNMTNFTQIDEELEVDAHGAVTYVGKEDKKIKVSVRKGRDETGTWRPDDDEMCLTKTTAHRSLSGAGMEDRSKEILDRDGIRMTTKFEWDEASRHRH
>Arab_Me14_ctg01_-_Arab_Me14_ctg01g649t1
MAPPKETKFKVAAAHAAPVFMDKAATIKKTIKLIEQAASDNVKLLVFPETFIPGYPYWTEAYPPMDQVGAIAKYTEESVVVEPNGEDVSAIQDACRHHSIAINLGISERMANTHTLFNSQVIIDSDGTILGVHRKLQPTFVERMVWAQGNGSTLRTWPLSLGYNLGGLACWEHTMNGARQALIMQNQHIHAGAWPALSTLRDFAGVANTQIEALMKMHALTAQVFVITASDYVNQQALDWMEKNLGKQDHIKAGGGWSSILHPFCMFIAGPHSGAEEKLVTGEINFADLGPVKVWVDAAGHYQRPEILQFGYDSRAHWLDEKVDRFKPRGELKPKEEADEQS
>Arab_Me14_ctg01_-_Arab_Me14_ctg01g650t1
MTSTEDTPASHKFQPDTTAMEAFAPPSASPSHYSPEAIGFLFGAGALVLILIILWVYIAAEGGPSETLRSFRGRREAKRKALDIEMAERTADIDRVLAQGEVDKELEEEQKIARQEALNLLNGLMANNNLVGSTLPARPKAVDFREEQGEEKRLMRLQKSWNPVI
>Arab_Me14_ctg01_-_Arab_Me14_ctg01g651t1
MPSSSSPSVAARSSTGHTMLFRLGSLRIELNPWNPLYAVAPFITILVSIPLAIFAVVTTSIALSLLAFRGFVVYTQLGTAILSAWMSPAPPKPVALQHQPASPKRTSPPRNRNGRSGSNASGASSRNDATTASRLGPKSESSTALFGGSELTRDYEGVGGWRDTGNEDEEALWIGINSRLQLPAATPDRRHQRRHTGGQSPNQRWSRSPEAFRMSPVQSRARTPNRFMGNAGPDNEDYFPIQPTNKARLISTVSDPSKRHNRRLSGSASSVSSLASGIMAAVREVGE
>Arab_Me14_ctg01_-_Arab_Me14_ctg01g652t1
MVSQQLEQAYEKYRYEALFGVWLVVTGATFMRIKRQPYSTRLKVEQYESIFKGTSLGAIVLGVVMSPKRGMKRVP
>Arab_Me14_ctg01_-_Arab_Me14_ctg01g653t1
MAPHCLSQYSSPELCTNYHTGLSTRGKTWRFDSSPRMVSNDLALSIAVPVAVGVVLIVAILLVPKGFFSYVASKIYTASCNSNTSNSTRRWFGRHAQNETSSMNEKSQPTFVEQHLGMLRAWQKPTKYARHLQPVQPTKPGDSHQPFRLTGMSFRYWQEFQRNASVRCNPMHEFKVTGEGVKSPAYWTQVGKEIEARKSWWEIIKA
>Arab_Me14_ctg01_-_Arab_Me14_ctg01g654t1
MLATGKPVWYLPFTILAIIFFVVSIARLGYDRYVFANSRDPGSLTAFLSADTITALKDDARLHHALLGLTESIAQTSSDIGHKYGFEGVKDFGNTLTEGVAEIRKRQEVTGQKRALVDDTTQAIDSLLSGLNVNASGGVSGIIDSLSNSLFSGLATPALFLGVGFGIGASTGLNITDMATAKAQASKVAITFNATATGVNLAFQNIGSGLAGQIAPSLGQFGMTSVLFGPAAYALASGIGNATSRALKLTNQEFRPSDNSGIEAVAGNLGLGITTPIVSNIDFQAVMKSVGGSGLGASLMQQLPQIAAAAGNGLGEGARNGLGFKQAGQTKNQIAKRQTPTDTLKGIDVPGAVNQFTKGLSQSFLTGVDVGNLASSLNITGNLGGMIDPSMFPALAAGAGSGIGMGLAIGLAFKSADAAPLIAQNSNDSMQTAMVAETFTRNLVSNVLLNSTVLQGIGATISSSEPQLLKNADVAKAAEGFGRGTIEGISTALSSIGGIQNLLSGNFSDDALMKVPVLGATKFNDSLNGSSVSFARGLMGEGTILIGEVLKQLNQKANQTGPSASSKPKRKVVVSAEEVAVVPYDAIVARQAQNDTSAAAPFPLAINEATIMGGGQLAINMLTCQGIGGFASVALGALSSSKNKTSMMGMMSSVPLDPRAAGSLPQGPVEFTSEGNTFRIVLKDAEISINGLPIIPFGILTALHVLFMMLAFLLTLPLYLILGVIWRLSVLAGYPVNEVKNKKWRFGLLITFGISAVIGISLGMVGMGNSRHFRDAHGIFGLIALIFVFPTVGFTIARLRSEALYPISSTFVGVKAPFALLKSPDQRIYLISGILIQLIFALGQLTFINGFSALRSISLCIVDAVLTSNSVAGLMGLLLMVQITAAGMVGIRTWLEQHIAKRQKAGVQPMTIVEAGVTTRKDSIATFGFGGSRSTAPPPLDLKRSPPVQRNTGDLEGFEDEKISTPFNVRKEGADSTEFNSPGKHGRQPSAGLRENPFLSPAERRDLDDRVYPQTANYQYEYTSAIDDNTDYYSVPVGYRAQGAKLSSGRPSSELVDPLRSPLPSGLRAGGGQQGYGSSPPKTQGVTMADLFPPPPPPPADEQYQLTGKSASSSYSRPFDGRGRPSSEAMRGGGFGSGPGGTVRVPKETQFI
>Arab_Me14_ctg01_-_Arab_Me14_ctg01g655t1
MATSASFDVIGTCFEFEVPITAIHDRLGDKLSTARCDPKTLFFAWFYAAQRDFTYVSLAGAYKPIAEILKLTFKRACLIVDLPASAVSDDDVAAIMTAFKSMGPREGLKECFDGLREAGWDVYGVTNGGVETSLAYYHNANIELDEQHLLSCDDLQIAKPDVKVYERAQDHLTKQGLGHKGDGKRWFVAAHAWDLIAARAAGFKTAFLDFEEHDPVTEVFGDFDLYAGSMRELLQKLTEAK
>Arab_Me14_ctg01_-_Arab_Me14_ctg01g656t1
MLTDNIDSLSSVRLVGVSSSLHDLIKSLLFPLPHTRSSAEMPSVGNLLYYSAVVAWSAAVYQFLIKDILTVGLGLGRVIQSIDEFPYSCQRIEHPQLEACEDLWLDGSDRTLYAACAGTRSRMAWSPAISKLDASGRRPSGAEIVALEIDSIAPNGFFSLRSIKPTGSFGAQGNAILDTVGFTGEFIDDTTIHFYFPNVPPYHGTYFDATELGANATVEVFEFKRGNDEMKHVRTIQSTAVWSPNRPAAVGNGDFLVTNDHGAKVGWRKHLEPLIGGGTVAYCSSEGKCHSATPAPGIDIRANLKFPNGLARGEDGLIYVPSSADGTIKVFALQPNRTLTQLHTIRVGMPLDNVSPDARGDLWVPGFPDTRQTYKGVADPYQHVSPATVFRVRKVSGAGPGELEYEVKKMVEDREGKVISGATTVVHDVKTGRLFMGAAVSPFLVVCEPKQ
>Arab_Me14_ctg01_-_Arab_Me14_ctg01g657t1
MASRRSLGGGRVLGSGRNLSSAVSPAASPAASPAPAPPHTLQAPQPQHGHVRNVSLLSPSESSVSLSSQTSVSPASIAETGEDIGSKVLLGPSEHAAARASSRLACPICNEHMVTLLQLNRHLDDNHQNLVEEEQDEVKNWFEEQMVKAKKFQPLAVLNQKLKGLDVFESNSAPTPPPASHTRTAHDTPPAPIIRRDPEEEVTRAHWQRPGYRDVCSDPLCRRPITASGVALGNSQSAVNCRQCGQLFCEDHTLYQMKLSRAAKHEPVRGIWCRVCETCYKSREGYNDHHGLERNHFDEFAKIRRKRLDREHMEVSRLEKRLTKLTQLLADPPPAEGTPTAGRWFGLSTVGISTAKNQRKALEQSIITWEEDAKVSHCPFCQQEFSTYTFRRHHCRMCGRVVCGDPNTACSTEIGLNVNPNRSEKITDQMSVDVRMCKDCNHTLFSRSDFEREMAQRPKDQRAYENLAQFERGIRLLLPRFQKLLTALQDPERPPTPQQLTDATKVRKRLMDAFAQFDAAAKRIRDLPTESPTQKRLQQAVYQQAYSFLSLHMLPLRSLPKILKHAAPQGRPTGGGALAAIKASDKSGGSVVGSSEVSAMETEEKELRERLIVLEEQKFMVSEMVADATKHRRFDEHTTLAQNLDDLNQEIDHITGQLAQLDFASAYQRDENSPALR
>Arab_Me14_ctg01_-_Arab_Me14_ctg01g658t1
MAHEQDFPEIQGGGSLILAWQIRNKRVLVVGGGEVAAGRIVNVLNADANITVVSPREGLNPEVAYRIEQKQVDYVDRKFEPSDLEGVDMVMTAVDDPEASSQIWKLCKEKRIAANIADVPPECDFYFGSVHRDGPLQIMVSTNGKGPKLANIVRRQIAANLPPNIGMAITRVGMLRKKLRQVAPDISEGPKRMQWMIKVCEAYSLDDLCSMTERDMEQLLGFYKPNAAPSLDLLRLQEPDDRHIDGLGKRALSRISTPSTHYQAFSTPVVVCIHDLTAFEPINVGWPMRRSLMIPPSLTSNPATPLHLSTALALAPLQSWTMDLAQRPPYSTIDFKTLAKADPDFKQTWQACSGKLDFQDPATLQSLSKAILHVDFDLELALPDNRLCPPIPNRWNYVSWIHGLLDSTSSSHSNRYDPDRDVVGLDIGTGASGIYAMLCMKSRPKWTMCATDVDKVSFESAAANFARNNLLSRTKMLHTTSSMPLIPLEALCLQQLDFTLCNPPFFTDSVEMEKSLSGEGKATGPNAICTGSNNEMVCPGGDLGFVTRIINESLALRDKVSWYSSMLGKLSSAKAVVELLKTNAVTNWAVGVLDPGTKAGTKRWVVAWSFGDMRPRNSIARPPGGSFPHDLLPFPTSYNISLPSTFTGSAAFAKLNDQLSTLDLVWKWNAATSSGVGEASENVWGRAYRRAYERRKREGQVEMRGGTHDKRTQLAFRITVVDLAGEIVLEWLKGDDQVLWESFCGHITMSSPSNSAVYFTSSTELADLGAARFDHDTAAIGDKDYALNSYAPVTVQSGRAPKGLEDQVFAWNTFQYTTSEKNEKEEKKGDLHEGQLHRQNRAAAGVQPTTLASENRPASYGGGRGAQARRGGRGGRGDRGGKGGGGVGRSDGKPDALCAGRKPEGKAPPLAKGFAEELDKSLFWEGPIV
>Arab_Me14_ctg01_-_Arab_Me14_ctg01g659t1
MNLCSITETIPERRGRIDTPILETLDERRRTWLYLLRNQHYEPLIFDILNDELPKYATSCAIDPAELTILTRECALILASAPRVFFAAVEGSLVGRMISDTELQAEYASIQQRAHHQPSIYAHLLADDRGNAPTPNQCLVIRDMVQDYLSGDPSEHAHTIDNVTPPLVLLEASTKGYRKYLHTPSTDRSPKRVATLQRFCSGITLRYTQTSPHLHNTPLPYPPSEVGYALQAHRRLAQHRAHRSSNHVMNLVEDICTQLFRTNALTQHFEMHQFVIYLIFRPSQAAIAEIFCSGLLQCWVEGGGFNACPAGRSVASSRRVSAGQWRVYEEAAREVSLLDARMEGMKERAEVWREALCWEDEDGDVEKKGVKG
>Arab_Me14_ctg01_-_Arab_Me14_ctg01g660t1
MAEPTAPAPATGEEEKGPSKRALEKAAKKAAAKAKKAEHALRPKEQAKPAAKAEPVSMFAEGWLKRIYEEKPVKDVYTRFPPEPNGYLHIGHCKAIAVNFGFAKHHKGVCYLRYDDTNPEKEEEKYFTSILDIIKWLGFEPWKVTYSSDNFDKLYELAEELIRKDGAYVCHCSREEVNMQRGGPDNRGKRYACEHRTRPIDESITEFRAMRDGKYKAGEAYLRMKQSLTDPNEGNPQMWDLPAYRVVEKNHHHRTGDRWKIYPTYDFTHCICDALEGISHSLCTVEFRQSRISYDWLLEKLEMKVPKSEEKGPMQREYGRLSVNGTILSKRRILMLVEGAKVGDRTIPPSVRGWDDPRLYTMVALRRRGIPAKAMLHFVEELGVTDSFTDIEAPRFEASIRKHLERTVPRQMLVLEPIKVVIEDFAAEDDQEVTVPYDPKGGIPGERKVKVGGSIYIDRSDFREEDDPDYFRLAPNKTVGLYNVPFSIRATSFSKDASGKVTEIKAVKVPASERPKAYIQWVDAATGIQVTARQYNSLFKTESPNTLNWKDGSWADDLRTDSEVIYADAVIERGLNNLIAENELNPGGSSDALVRFQALRTAYFCVDLESTPERIVLNQIVSLREDKGK
>Arab_Me14_ctg01_-_Arab_Me14_ctg01g661t1
MAGGEDIWRMSSKVQVQAQLEDTTRHDTHDLAVTTTTMAPLVNQPQIRQASLHNPLPLQLHLYVWPFLIVWPAFSSIYLSSARYEQYIQSQEWTFVWVASIVTLQSLVWLLTQWNINLRTLFTTTKAADIRSARLIKVQPVENAGAAEICELRRDNAGGKPNLSFLFQKRRFLYDAAAGSFAPLAYALDSEPKPQLKTLQQTQGLVSPAEMERIQQHYGDNAFDIPVPTFTELFKEHAVAPFFVFQIFCVGLWMLDDYWYYSLFTLFMLVMFESTVVWQRQRTLTEFRGMSIKPYELLAYRQKKWQDVMSDKLLPGDVVSVGRTKEDSGVACDMVLLEGAAIVNEAMLSGESTPVLKESVQLRPGDARIEPEGLDKNAFLWGGTKVLQVSHGNTADDDANTVSRLSSGVPPPPDRGAVAVVIKTGFETNQGSLVRTMIYATERVSANNVEALLFILFLTVFAIAASWYVWQEGVRLDRQRNKLLLDCVLIVTSVVPPELPMELSLAVNTSLAALSKYAIFCTEPFRIPFAGRVDIACFDKTGTLTGEDLIVEGIAGLTLGQTNAKTSPDGAHTDLTKVTDVGTHTTLVLATAHALVKLDEGDIVGEPMEKATIEALGWKVGAKDTLNASTTTAKSHAELVQIRRRFQFSSALKRQSSVATVLVTNNSGKKVRSTFVGVKGAPETIRKMLVNAPANYEETFKHFTRNGGRVLALAYKFLAEEGEWGQNRINDLKRETVESDLHFAGFLVLQCPLKPDAIEACRALNESSHRVVMITGDNPLTAVHVAKLCEIVDRECYILDAPEHDESGNALVWKSVDDKVNIPVDPTQPLAADIISSKDICITGYALAKFAGQPGWKQILRHAWVYARVSPKQKEEILLGLKEGGYTTLMAGDGTNDVGALKQAHIGVALLNGTREDLDKIGEHYRNTKMKEIYEKQCQMMTRFNQPQPPVPVLIAHLYPPGPTNPHYEKAMLQQAQRKGLAASANGAVNGSTDVAAPQEKKPLGIGEQLTAKMMESELEELNSEPPTIKLGDASVAAPFTSKLANVVAIPNIIRQGRCTLVATIQMYKILALNCLISAYSLSVLYLDGIKFGDGQVTISGMMMSVCFLSISRAKTVEALSKERPQHNIFNIYIIGSVLGQFAVHIVTLIYVSQFVQRVEPKDPNPDLEKDFEPSLLNSAIYLLQLIQQISTFAINYQGRPFRESIRENKAMYWGLVSVSAVAFSCATEFIPEINEKLKLVPFTTEFKIMITTVMAGDFIACYVIEKGLKFLFSDNKPKDIAVRRPDQLEREKERKKLEEVEAQKKKNELIEEKARAAGIVPA
>Arab_Me14_ctg01_-_Arab_Me14_ctg01g662t1
MNPSQNFSLATELPRRCQLPEHLYIVVDDVAFPTIGHEDGSVVTPRLGDFHAKLDFACEDVSQDHLRSYLKQKNSLSTQSCFISTFEDEEIALRAPPFCASEMIRSGIYIPHATKLIIDTTRLHAGWIDTSSARVPVWLEHGELPKVPKGVLYMTSEGVEAFDASIWICVAEVRNVLGLKPHHGERGEWLACGHITRSMVEAQVVLHAYQREQIITSQLVPRRSVSIRSISSEEQEKHLNQQIARNKASREDLRLRAVAKNQECEKAASLLRQATENRQAQKQTGRRYATESPCKFPREEKLEQRVFVQSPSEVAGTYSVGHIATRYASVRSPRLREALERNQASKSNENLNSSSCSRLPAPQNFKKELPGHFSFHEARYVTLSDDFYSMSAGESPPSLHRRDTRDRAREEDSYEQTFADPPKTSLLPVSIAFSRRAFDEDRNTLPPSERLRRARAGKKRVSFVEPDDEVNDVLISVGQASNVISALEEPNHVRVSFTLPEPPLSSEGESFSDDAPCGTNEDLHTSIDFSLEEGSAPDPQTYASQRAIGSRKEREDVLA
>Arab_Me14_ctg01_-_Arab_Me14_ctg01g663t1
MDAWNDPSDLPASVEPNINDVHANLSPSNSDPFKFSHGLTGVDQPANYLFVNILTATILAPVIATILLRTFVYLRNDRRRVSVITSCRSQNFWRRDRYSCWGPLKRLFLYAPLVGDRHSREIRLTSTVHAGGLPTRPQFLVIVIYVASNIAYCLAVPEQLPDQRFAELRGRCGALAAFNLIFTVLFALRNNPFIWILGISYDTFNLFHRWTARLVILESIAHVAAFVYNTYRVTYKGQDGWANIKWVLGHSVSYQWGLTAFVTFIFLLLQSLGPIRRAFYDTFLSLHRLGVIVAITGVYLHMAKHALPQLPWAVLFIALLALELLIRFGRILYFNFSWRRRNWTRVTVEALPGEATRVTFSTPRSWNHYPGLHTYVYLPRIAPFAVHPFSVAWHTSSGYTRLDQEKLPSNIEDLEIENGPSTISCIVRARTGMTRSLYDRASKAKTGSMELWGAIEGPYGGHHSMESYGTVILFAAGAGITHQLSFVRPLLAGYSNSTSATRRIVLVWCMPTIDSVEWIHPWLEELAAMPDFGDIVQVRLYVSRSSPQAVEALSLPMQVNVHTQRCNPQDIVDEQVLAQVGAMVVTVCGPGRFNDSVRAAVRRRVGLRSIDFFEESFSS
>Arab_Me14_ctg01_-_Arab_Me14_ctg01g664t1
MQEPSTPSSSSETLASQPQRATPPTRHHRNQDSLIFINATIPLSPASSTSNDSSSDTLLDGLAPRKRSGFARLFCCFGREERARRRALRATQFEKVGEKCHWSEY
>Arab_Me14_ctg01_-_Arab_Me14_ctg01g665t1
MFAARNAFAQAQRRAFSASARQSSKVTVLGAAGGIGQPLSLLLKLNPRVSKLSLYDIRLAPGVAADIGHINTKSEVTGHAATPSGLAEALKGAEIVVIPAGVPRKPGMTRDDLFNTNASIVRDLAKAAAEHAPEANILIISNPVNSTVPITAEVFKAKGVYNPKRLFGVTTLDVVRASRFISQLKNNDPASENITVVGGHSGATIVPLLSQSGYNLSGEQLDSYVKRVQFGGDEVVQAKEGAGSATLSMAMAGARFTESLLKAAQGQKNVIEPTFVDSPLYKDQGVEYFASNVELGPNGVEKIHPVGKITEYEQKLLDACLADLKGNITKGVKFAKENP
>Arab_Me14_ctg01_-_Arab_Me14_ctg01g666t1
MARPRKDVKFAHRNASNGRARRASMSMSDISETGSQPGSPSRNGAAHPPPSQPEQSEYEKKKANFIVRTTWTLLMIGGFFFALGAGHLYIIVIITAVQVICFKEVIAIANVPSKARSLRFTKSLNWYFLGTAMYFLYGESVIYYFKHVLLVDRILLPLATHHRFISFMLYIIGFVFFVFSLQKGHYKFQFTQFAWTHMALFLIVGQAHFVINNIFEGFIWFILPISMVITNDIFAYLCGITFGRHQLIQISPKKTWEGFLGAWFFTIIWGVLATHFLAQYKFFICPVNDLGANVLTGLECKPNPVFLSRNYTLPFIPEVIPAYLPIPRTFDIMPVQFHMVILATFASLIAPFGGFFASGLKRTFKIKDFGDSIPGHGGMTDRFDCQFIMGSIAFFYYSSFVATHHTTVGGVIEAAITGLTHEEQFEVVKILSKNLVNHGTIPPQILEYLSAQVARR
>Arab_Me14_ctg01_-_Arab_Me14_ctg01g667t1
MAMSAAAAAAADDDLDFDFSDHDLDDLPANAIQQFEADAIRATQQQTQTRRAAPESDYGLDDGDAVVNLDDADSFAQAQHADAHDAYDTYDAYDTTIDESRHFDHAHDHAHDHAHDHAHAHDHAHDHDHAHPHVQALQQPRPSQADPGQLLSRIKQLEQDKAREKRHADDLKAKLQTKAGEADTLRRRHDADLRRHERQLADQHLFHGGELAKLRAEMETLRREKEQASTNNMFHQHDVRDAAMAPRTRKPMAARPKPSAAVSPAATPRKKARGPLADGFEDDDLLVASPSRARESSKTATPSLASKRKRNVVDASPIPLQLSEPRSAKEPEPVQREAQIDAALLDYFRKDDQRFDLLHRLLAHRSSNGTDRVLEVLAQHAFPSDPSKRLSSIFYDALAAKAFSDVHALALDICFAICHLWTRCLAEKYYAPVNLLLDAFHFVLACERCETACQVKGRFIPLMIDSIDLVANPLSKAAKVGEDAVAALYASGHREVTAQIDVLGCLELLYLIATSCVSMDGTESAELWASIPSDFAIMLLNKEQPIAQVSLMLRIISTSALPASIGPITSSDSQVDSQASKEDALIGRLTNLFTETPGITADCSPSSPSSPSSDPPETVTESDILELRFQVIDLLTSLSIPQHGATRLAQNRICIGRLIKYLDRLLILLYKSPLAPTQDVTIDSINSTMKLIYHIVTSNPGFDVKSKLVNTLGGQHAYLVSLTRLAFSDGLVLEAGIEDAVIDMAHHILDEGLSLEEGEAFGAVFSTATSTL
>Arab_Me14_ctg01_-_Arab_Me14_ctg01g668t1
MDRYFIAKIPAMAPSVLTLGLLALILSYGPHTAAATGINPLVSRQSNGTALNPHFTAISDYIDSITDDLSSINTEIHSNPELGYEEVKAHELLTSFMEEQEGWNVTRSVGNISTAFMAVFEGSSEGPTVGFNAEYDALPELGHACGHNLIATVSLGAALAAADVMRKESLAGRIILFGTPAEESLGGKVKMLEAGIFDDAKMDISLISHPTSNADSPYMLTTSTDRVDVEYYGREAHAAAGPWEGINAQDGLLVANSALSYMRQQMRPSDRVHGFISSAGSRINVISSKASGSYQIRANDETQLANLTARVENCFQAGALATGAQLNFTVRPYGYANHVSNDLLAASYATHFTSLGGALQPAEIDKLKDPSGSTDQGNLSHEWPSLSPFFQITNQDGSVPAGGPHTAAFEVAAGSQPAFEKAVQVAKSLAGVAVDVLTVEGLLGEIKSEFEKTQTSPRRRR
>Arab_Me14_ctg01_-_Arab_Me14_ctg01g669t1
MFSRVARARAPASILRRPVTQTPTPTPRRFAMAPARKQSSLPEGYKEDHSKGAMLRFEDSLPRLPVPTLAETARRYLKSVHPLLSAAEFEQTTRAVNDFVAPGGPGETLQQRLEERRARPEIKNWLAEWWNEAAYMGYRDPVVPYVSYFYSHRDDKKRRDPAKRAAALSTAVLEFKRLVDGGQLEPEYMKKLPMAMSSYEWMFNCSRVPKKPADTSVKFPFAQNQHIVAVRKNQFWKIPHEIGGKQLNTSELELQFRRVYDSAVKTDAVGILTSQNRDVWADVYPKLKAASPVNAAAIEAIEAASFVVCLDDASPVTLEERAHQYWHGDGANRWFDKPLQFIVNDNGTSGFMGEHSIMDGTPTHRLNDHANKLIFTNALPFDDPSIRSDLPNPKPLRFELNAELKSDIAAAAAHFTSQIGAHELRVQAYQGYGKGLIKKFKCSPDAYVQMIIQLAYYKFYGKSRPTYESAATRRFQEGRTETCRTVSDESVAFCEAMTSPDTTPEECAAKLRAALAAHVAYISDASDGRGVDRHLFGLKKCLKEGEPVPALYSDPAYSYSSTWFISSSQLSSEYFNGYGWSQVVDDGWGLAYMINENSIQFNVCSKGLGSDKMSFYLNEAAGDIRDVMLPSLEAPKAKL
>Arab_Me14_ctg01_-_Arab_Me14_ctg01g670t1
MPPRAFVNDALWRCLCPGFPPKALAPKAARIGGSTIVSPRPQRSTRAPQCQKRPYSAAASAPSASPFFTQPHAPPPTSRDQYAPRVPRSAREKTPLVQLPTHVLYESLRHEGFKGHFDEVMRICNVLVKDRGQRPDKDMYAAILHSFTSSVDGTAGKVRKVLEDMGFWADSTSEGGVAEKVELDARGCENVLEALAVHPDYLLRAEVLEYMKERWFTLSDRGHNFVVAGLLRDRLFEQALEMLEDMCAKQVRVEEWVFSEAMWLLLEFGEIEEAFYVLGLKESATSTNTAGAAAGVKLSNALWGAMLDAAAKHHLHDAARLVWTAQVQPGFLKPPTGTCLSVLSLASRHGDVQLATDVFRLLTERETVFTTHHYELLIAAYLKANALSDALSVILIMTDANLKVDAGTCHPLYWYLRNAPPSAPTTRSDGTEETATLPLHAFTLLQDFEAQGRKVPTAAVNCCIAASTALNALPDALEMYKALHTVCPSGPNTETFNLLFRGCSQSGRKDVAMYLASEMISLNLQPDRITYDRLILVCEQGDDLDDALAYFEEMRNARLRPRRGTYERLIDRLVERGDERCVAVLRDYKASGEAVSKGAERRVRERFQLKDED
>Arab_Me14_ctg01_-_Arab_Me14_ctg01g671t1
MLTGKSLQMTQLLLVVLPSFVLFGYNQSGVGGLLSLSDWNKHFPSIDTVHVSGALKSERSTKQGAVVATFTLGALFGALTCSWIGDVLGRRKVIFVGAICTLIGEILQCTSFGIAQFVVGRFILGWGVGQLSATVPVWQSECSSSANRGKHVVLDGCFIALGYLLEAWINLGFFEQNNLPLQWRIPLAIPTVISLIPMAVVFVIPESPRWLVNKGRVEDARKSLSQFKGLDLHDPEIASEISAIELALEETKGSAVKISDIFTNGKDKLFYRFSLCIFLQFLQQMCGSNLISTYSTIIFQQGLGLSSETSRILSGGALTWKFLSCFVAFFTIDRFGRRKLFMFSGAGMASCMLALAVASSFPKTNNAAQIASALFVFLFNFFIPVGFLGANFLYCTEVAPTRLRVPMAGISTANHWLWNFVVNMATPVAIETIGWKYYLVFLIISAIIVPVVYFLYPETMGRSLEELEMMFSSGRSITGIVRESRRPLTGGFASDIVSIEKGDEKNVDKVESVRS
>Arab_Me14_ctg01_-_Arab_Me14_ctg01g672t1
MSYPISTTAIVSDAPDGTHPRWRIVKVQLREPNEDELLVRIVASGICHTDIAISTFPEDTPGFQPYPKIMGHEGAGIVERIGSNISHVKKGDKVLLSFDYCGNEQCRACEDETPGYCNEFHVKNLSSVPGVFQVDDGKSAGGLFFGQSSFSSIALVKGASVVNVEQLVKDEEELKLFAPMGCGYQTGAASVTEVVDVGNKDAVVVLGLGGVGMSAIMAANVRGAKTIIAVERIQSRLALAKEMGATHVIDTSNFRNLTADLPIAIREIVPAGANAVFDTTGVVPLIAGAVKALHFKGQIILIGIVNGKTMDLDLGELLNRGTAIRGSVEGNAQPSKFIPQMIDWYRQGNFPIEKLVKYYPSEDFEKALTDMHLGSTIKPVLLW
>Arab_Me14_ctg01_-_Arab_Me14_ctg01g673t1
MERAIRIPFPLPQALHPSDEAPPKSQAGVGLRRFDTSCSAKGVTLGDHDAQLGLDNSSDTMIPRPRTPMLKRVKSNWHGLPSPQTPSYTYDVSSYQSTDVLFDGHCGNKKESPRSPERRGRVRPPGTPDAVVSHFNTPFSPSTSDNAFSFESKEPSVLSQRRLRALPTLIEVDAESALEHSTQSSTRRSSRLKNKMKNQEETNSIFKPTKRVTQAPPISPQEPSQQIFTSAEPATSSFEMAIAHGDELPTLHSTDWQLMYPPGGSSHPSYPWPAADPRLVFEPHYVPLRNGLPDVSYVPGLILPMGWRQVCWSGLHPVVFDPFRQAFKLTPVGPLPLTCEEVHQGGLQNYIPGGKSHPEFGLLPQMSTFSDGSDHEVFNFEGIDWVLPWSHMKGISEIDSGLVSSIIGADMKQPTALVTSVAQPKSHYVEARDCPDHVIDLEDGWRWLKALDPNGTAAFTPTPGKTWSGTGIPMTSRKTKQPIASLMALAMKDKDTDAGNYLVKQDRKRFCSFKSVATPVHIDITLLQDVEFTIMELLCYFPSHYQWRGGGSRLSRSGMGPSDVANVINMVRCLPPASTCKASTVDGYITWRDLQEDGSRIHNEPPDMEATDYTAEHWSSLIWEAQDYPLLAIALGLQELPSGLNAGPITALIKWCRENDRIQVMLSDVPSLLREANIESPIDPSNGFDPDKGFLSLHAEVIKLDRKRVIQEKKDLHSDKERKSRKRKFG
>Arab_Me14_ctg01_-_Arab_Me14_ctg01g674t1
MRFVLHLALASLAAGVSIRSPSVSLYEGTKVYHVKTGRHVADVQERLAKLSHNVWESASDHIDVAIPRHEVARFEALGLNSRVLHADLGASIASEAEVRSYWKRQDYNTSGDWFDSYHPYEDHIEYFKQLQESFPENSNWTSSGTSYEGRDIYGIHMWGADGPGKPAVLWHGTVHAREWIVAPTLEYITKQLVDGYKSGDNLTQTFLNSYDFYIFPIVNPDGFVHTQTTDRLWRKNRQPPPATAANQTCYGRDINRNWEHNWDANTRGASDNECSQTYRGVRPRDAPENAAMDDFLRNIRDEQGIKLYIDWHSYSQLILCPFGHNEYLYAPELGRWTRAASLMSQEIAANSTNQTTYTFGPSGAVLYPTTGVGVDHVYAVGRAEWSYTIELPDTGDFGFVLPPERIRPTVEESWVGQKVLLSLLDETFFDGEGPAIFY
>Arab_Me14_ctg01_-_Arab_Me14_ctg01g675t1
MSQEPNTNALTFGNIEDILELAQKQLHGRFSDPEYSYVHNALDHLFYLGILECRAHRGNPAQILKECLQDERIVLDRHNRLQGKILLQQEMIYDVSESPENFPLRHLILEKGISLPANNFRPIYHLVDDPEKLQAAHNARRNIAGATTRSDSSSPRTMTGYAPKQHANKSGSNHDKLYDAPSPEHSFPDGNITLAEIAAFIPQSIKSWDIIDRIIWNSAKAEDIAKLFNKHRAMPAGAIVNNTVYMMMRGQMYKRSKEDVAYKGWTVGTHQHITKPDEFDPHSISVTGFRRPRIFANRSDNPADPVPFKDLANGVAVWPEHGDALDLTRCVSWCVANPEAQYFYPVDFQKVLHECLGGPVIVKPRNEDAQILSRLRVAGGTYKPRDRVTKDLSDDDTDEHKRDAVAHSEKRKRSTRVDGYVNRRKTLSSRSTRASRTSTARTTTGNSSFSFQMVDSEDDTDDNAYQGPKRTKKNKAAPRRSERTKKSVQYDDGAMIIDEEEGELEEDQGTEREAQKNDSIGDEDDVDDGENDEIYQDE
>Arab_Me14_ctg01_-_Arab_Me14_ctg01g676t1
MQPFRTNKVSTISGDPQSIINTNQDSSDEGHQNGNMQFNRTTYPNAGAFQHLPVRRTLSGAPAQEHPNAYTIFLRDLPAHCYILPPVPLNFTMVELIVLLPNWFKNKSVVTRFMNNNLTAAIHFMILEEHRYLQFPTGKEKEKARKTIADEYRRAMRKMIPSWTKVGHTVPFGWDPNSLAMDGFVPDDVEMPGYRRPASIPFRDLTMGVQKIPEGPHAGDLTSALQFALQRPEIYMFPEDLPVILNHIGPTKITIAHTDRAIVRHYDEIKREGDHAKKYPSRHNGLRPTAEELVARLSPHETFEREKMHTVVQALRQGGRPAATESPEVYDPPFMFQRSGFNVAGMLPRNQKSVVLAQTQPNLAHEVDELFRLPAQVETDAVAYQTVEKSPIVGVERSSEATMDALLRPYQGTHDSRTLKLTAGRPYAPSQLLRHCVEGNIGFDGSFFAQAARYAQRLDQIGTHWCVEHVPWLAQILSAAQLEDRVDL
>Arab_Me14_ctg01_-_Arab_Me14_ctg01g677t1
MASSPQGKQRLKEDKDSIKDENEQKRFDTTSRQSTIAQFIKSGQVAFGGVDPQPLKEKDEKNGEVQTWMLDRICERLADASELNGNDILALRPLLKLEYCKSGLNDCISTGFSCLLPQLLRLMQSNLTCAVNFSNHVLDAPDNEVPREMKEELLCSVAQILGAVSIEKRDSGTIKRQLATLEDAECGSVPEPQPQAKLTATAFGIFTKRLCSLGLFKPIESMLARLRSEMSHVHIVDLHTIYVPFLQELIGLMLVYGIPLKDVTYSSFFEAVLQQYLERFVGQVANGANDVERENWNQRAFAARAMLESFDHSYFRDILGDRYDRGLLPALLRLFEIAPSTTRSQPHNLCTTTSSTQSGEFKETVKTAKDKIDPALTASNVSLHI
>Arab_Me14_ctg01_-_Arab_Me14_ctg01g678t1
MYSFYTSLAKSLFCLVFARVYKRQVVPTRDLKGQTAIVTGANSGIGLSVAVARTSQGATKCLAFRNPDRGAAAVDHVVVKCGDKSRERVTCTILDVGDLGSVHSFCQSWVQEYTKIDMLVHNAGIAAPPAGSSIKTNEGLEIMHTTNFLGSFLMTHLLEPHLSSRARVVITSSTDSYSAIAHFAYDVARTEGITAPGLFTQLIARSKAILGLEAASSAPAYGLSKAQQVLLASLLQQRLTAPATRATGRRMLLLWALRQRQFLANMTLHGRHGQ
>Arab_Me14_ctg01_-_Arab_Me14_ctg01g679t1
MSSHSIGIPTSFDPAFLYSEYDLVQNAPSSISHSDDLEALQACILEDRAKKNVQGVVIQHQSWNLTDIFRSEGEQSIDTPLRNRTYLPIQRTSIDERPFPSSPPTFVMPLVSSPVAYPPSSSMPQATTPKKRKRSIDVRSPLNGAPKKETARRFGGFLDDSDNEDDVAALKEHSMKRIAVTSIRELPAAPEELAHCTLPASQDEIADAEDVPVEALDEYFDLQSQTKRLPLHTAPTYARSVHGSIARNSAGKTIYIPKKAKKEAISFEELIAARSEAVEGKARTSYYGIDIHSLIDEANAEDTAKAASQAQAFQNLTHQSIEQPASKTEKSNRTLMWTEKYRARKFTDLVGDERTHRSVLRWLKGWDSIVFPGSGRTKSRTVKKEFGEEEQKHRKILLLTGPPGLGKTTLAHVCARQAGYEVQEINASDERSRDVVKGRIRDMVGTENVRGISSNTANGKVRKAGKPVCVVVDEVDGVVGGSSSGGGEGGFVKALIDLINLDEKNSKMTGQQQATGSKTKKGDKFRLLRPLILICNDLYHPALRPLRQSSTAEIVRIRQPAMNMVVTRIQDIFSKEGFQCDSDGVRRLCEATWGVSTKKEGGTGSGTGEGDIRGVMVMAEWVAGRLKSTHDLRSSDRPHLTKKWIEDNFINDLKHGGGAARSLGRGGAKDVVDRVFKEGAGFPKQAETTDVRTAAARAKTGVVGVAEAAKRRAMDRLREMVDTSGDCDRIVADCFAAYPDKPFQDDTLLSKPSVAYEWLHFHDTLSSAVHSSQEWELFPYLSQTALAFHDLFASPRREASNPAADPDAQPLPFSGPGASFAAAEQFKASRAQLMGLQSSLSVPLTRLFRSPEEMATELIPYTLRMLSPDIKPVIVNTGPAGSRSSATAAVRKSSEKALVKKAVEAMAATGVRFERSRIEVDDAMNRSGGFVFRMEPPLDTLASFETLSSKKDDKVRYAVRSVLEMEWKKESARIDMENRKRRGGQESEEIVIPEEKDEDVAKKLEDANRRAVKRDFFGRIIKEKPLLEGEVRKKTKQEGDDDRIWVSFHEGFSNAVRKPITIDELFRGL
>Arab_Me14_ctg01_-_Arab_Me14_ctg01g680t1
MSQHTRTTFPLELLDTIVKMGIQNKLADGIDEVDVIIAGGGTAGCIIAGRLAESNPDLSVLVIEGGANNKDVASIQYPVFYLQNLLPTQKTALFYKGNKSKQLADREPIVPSGGTLGGGSSINFMMYTRAQRDDFESWKSEGWSADEMLHHMKKLETYHGPGEKKNHGFDGPINVSDGGFREKRVEDDFIKAAGEVGYPEIDDLQSLDNNNGVQRWLRYVSPEGKRQDTASRYIHPKLEDEAHSNLHVLVESKVVRVLFDDNKRAVGVEYTPNAEFQAVIGLTAHPVKTIKARKLVVVTCGACGTPPVLERSGVGERSILERAGVPVVEELPGVGKDYQDHHLLLYPYRTSLEPDQTIDGILSGRVDATELVKNNDKTLGWNAIDIASKLRPTEEEVAGLGPEFKAAWDRDFKNTPNRPLVLCGIVSCFLGDPSSVPEGQYVTAGVYTAYPYSRGHMHITGSSVEDPLDFDVGFFNDDHDIDVKKQIWAYKKQREILRRTDLYRGELAAGHPRFPEGSKAAAVEFEEPLSNVQNLVYSQEDDAAIEQWLRENVNTTWHSLGTCKMAPREENGVVDSKLNVYGVSGLKIADLSIPPQNVGANTNNTALAIGEKAADIIIAELSAAGTP
>Arab_Me14_ctg01_-_Arab_Me14_ctg01g681t1
MVQYANFLFPLYVYPINNAWEPLTSAAAQYPDVTFTAVINPSTGPAPDANGCPNKDYVEGIASLNKYPNIHTMGYVHTANKWDCGDAKKDICFCTAPAADVKANITTYASWKTKGCPGWSTVNPDIHINSIFIDEAPGKDGGSCLSYMTDLTNHAKSSLTTSTGGEVLFNAGAEIELSYFDVADVVIILEDTQDRYEQIPDIGVRNGNGKYARKSSIIIHSASNATNIIQRDTSTVLRVDKDAFHSMFYTDRSTDQYAYFPYDWAEIVKEVNVVAQANKAILGA
>Arab_Me14_ctg01_-_Arab_Me14_ctg01g682t1
METWLTSADISKVTAIQLSTTTATVSSTATLSFTSTLPAVTLPAQSFTITSISTQTLPAQSFTVTSVSTSIQTLPAVTTTATSISVQTLPAVTQSITQTLPAVTQSFTATSISVQTLPEVTQFITQTLPVVTQSFTITSVSTSIQTLPVVPQFITTTSISTSTQTLSAITVTSVPPPGTITITSVSVSIQTPPAPPAIIEIPQAITLTETSLSTLTQVLPAITVVSTSVSVSTFILPASPCPNYCLHLNSPSRYVIGTRAVDSISPRNAQFLDETSLHQNFIISITSLITSFLTLAPVTEIITTTNISPPDFITVVSSDIQTLTATTTLSQTATLTEILQITSTSVDTQIITAVSTTTLVQTERSTELSTISTTQVITTTVVQQLTSTETLLLTQTEQITEISTLSIPDPTTITTTDQITATSILSLTETQTEQTTETATLSLTSTLSLTSSITETLVLRTTTTSTLSIPSPTTITLTERSTETTTLSVLDPTTTTLTEILLSTLSLTSSLTLSTTETETEIVTSQVTEIQTSRITSTTTLSIPSPTTTTLTVQSTSTTSITQVETLSVTQIIVLTETSIATSTLSLTSTEIVSTTATTILSFFSTDTISLTETTVLTERSTETSTTSVLDPTTITEIEQEVITTTFSVLQPTTTTLTEQQTIVVSTTSTVSEPTTVISTLSILQPIITTLVVQATITETTSLLQPTTTTIVEQEIITSTLSIDRPTTTTLTEQSIETSTLSLYENKTDTTYVQLTTTLTSSGFSTLTAIELVIETVISTQTALLTSTEITTVVSPLTEVQTTTLILPQDTVTNTLLETRTITSNNIVIVTQTLEPSTITLDNTIEITSTLPASTVTIDGTLYVTPPPVTVTEEQTLQITQTLEPSTITLENTIFVTSTLAASTVTLNGTIYVTPDPITLIEENTFQVTQTLEPSTITQDNTVLVTETLPASTVTFNGTIYVTPDPVTLTEVNTVLTTQTLEPSTVTQENTLLITETLLASTVILNGTVYVTPDPVTVTESQTLQVTQTLEASTTTIEGTVFITEPASTITLEASTITINGTIYVTPAPITAVEDEDVIITTVTLEASTVTLDASTITLTPEPTTLTRENTLIITQDPLTVTVNGTVLVTLPPSTFTQDPSTILITPEPTTITLNPSTVIETLPVTQFETVLTTITVTQVSVQTSVQDSVLTRTLTEMSFVGTITSTVYQATLIETAYVTGPTVTRITPETFTITQPAATETISAIRNVTEFTISTLTINTPAPITAIEDDGDLGLAVRTVTYTQSAPTTISVFATSTSLITCSTTPILPQETTIIKSVPTTISVTETLTKNVLILSTTTQLVSFTSTSTTFVDAGQMVTSTTTLIRPTTFTVFQPATLNLTEYIRETETLLQTRTETTSVLTTTTQTSTISLLRTITAVQLSTVYLSATVTDFSTVSVPEPITFTVFRTISVPLPTTVTLYNIISSPQLFPVGVTTNPLLPLVTTVTQLRTSTVTLPAPAPSTTTILSTIFAPQLATTTRIPSAITITQLSTISVPLPQVTITSVERNTETVAVTATDLVHDTSTLFVTRSVPFTTTSVLVVTSIHILTVTSPALPAATITSTEFVTRTISQLQTVDVSSPAVGVTEAGMQTGGGVQTVTTTFTPAAVVRTQTLTTTSFLPGIVVTSTALLPALTLEQTISLTVFRTVTAIITQRETLNFFVTSTSPPKTTTNTISVTTTLVQATKPFTSTAFVHPTVTEIQQIRTTATETSTHVIPTTFTMRDFSTTTQTVTCTEFAGTATILKSFTNFQTISATTTRTIFATQISVIKSTIAATTSVVLRPTTIYSTQLIPSTFTLTTTSISVSERGITTTIFTGRTVTTTVTANPMNLPVRAERTQAVPVNIETLQTKEAPTETPRPQRYWAPFARR
>Arab_Me14_ctg01_-_Arab_Me14_ctg01g683t1
MQLVAFGPRQWKDADVQKLGGSIDFLVGLHSGHVEPQAWPLQSTRTYPSFVDRPIDQSVFYRHGAANRDSNQCLYPDGNDIGDLNINLNSTSYYYYNILGDLNFDLNSISHH
>Arab_Me14_ctg01_-_Arab_Me14_ctg01g684t1
MTERLKSIVAQMSPSTSGLSTITTKNPDDVVITLAIRTPLTKAGKGGFKDTKLDGLLVKTLKQVVAQSKLDPAVVEDICCGNVSDAKAAYYVRAAMLAAGFPNTTAGSSLNRFCSSGLKAVQDIANQIAVGAIECGVAMGAESMTSGGDRLERPFVDEILQNPEACDCMQPMGQTSENVGNDFNISRERQDRYAAESYRRAEVAQKAGWFDDEIAPIKTTIKDPKTGEEKEITLTKDEGIRYGTTFESLQKVKPAFLPHGDKSHAGNSSQLTDGAAAVILMKRSKAEALGQPILAKYVGATVAGLPPRIMGIGPSVAIPKLLSQFKLSLDDVDLIELNEAFASMAVYCLETLKIDHNKLNVRGGAIALGHPLGCTGARQIVTGLSECRRQKKKVLLTSMCIGTGMGMAGLFVNEQL
>Arab_Me14_ctg01_-_Arab_Me14_ctg01g685t1
MDILTMVEDQPTPKSVYNWRVYVSAMTASFASCMIGYTTSFIGTTVSLDSFKDEFGLSSMSASHSGLIQANVVSLFQAGTFFGSIFSYGTAYHFGRRITLWAFVTLFIVGVCVTFLPLEDILAPFTLGDLSQGLVKEAVL
>Arab_Me14_ctg01_-_Arab_Me14_ctg01g686t1
MSSTNPTVRHATRKDVPTILGLIQELADYEKASSSVEATVESLTRTLSHADPSDPDNPDKFSKGYAKTLLLTDPDGTIVGMALYFYNYSTWTGVPGIYLEDLFIKDAYRNKGYGTLLLSQLAKETLKVDGKRLEWSCLDWNEPSLSFYQSEKIGAAKKDEWVGLRVEGDKLDALAGSSAS
>Arab_Me14_ctg01_-_Arab_Me14_ctg01g687t1
MSAWPSPTASPSQAKSLRLLRALLREASYLPDAAARDYFRRYAVARFRAYQPADHATASFDVLALAKHRHRAFKRRHLAVIRARTAQQQRQAHKGLNLLRRANQGEGPCLEKVLWFTYGRLGRRKHALLHDLLKPDPAWPEAPPPLQLLYHSTAPCLQYFEAPAAHGTHGTHTIAISKQYPRLRAVLASQSHNALALGRAIKRPYFKAPIRNTWERPMPLERAVNNVRRWYAETMTRLLPALPAAEWDSIHAMSTGKQRIAFARRRTPATLVDLPRALADEDDLPKRLQRNLALDKLSKADRPAGIDRPHALTARYMQRLYAKLLTLSCKLEYDAVHKQWNAIWGEPMKSIRPVSYTAPVDHVLFADVDAKGLRPKAHQTKANTRPLVQPRTEDGDYMRFPFFAEMLPATHPMRIDLDKWKKERAEAHASWVASGGDA
>Arab_Me14_ctg01_-_Arab_Me14_ctg01g688t1
MHVGGAAVVGGGCRVGDVAQLARRATRARRRTRSAPQRTAGHRLPASQQQTTTTTTATLETRSATDCDRLTATDCARLRPAATRLRFFAGGSHSASLCPPPTVAHHPPSPTTVAHHRRPPPSPTTVAHRLAHAHQLAQTAHPAHPAHPAPHRTPAMQQVARSFPDPQPVYQQSPAHAPAPSPSHSHSALMAAPGFNRSFSDASGYAQQPHAQPHAQPHAQPHAHAHAHAQAQAHAHAHTHAHAHAMDKPQIYTAVYSGVSVYEMEVNRVAVMRRRSDGWLNATQILKVAGVDKGKRTKVLEKEILTGEHEKVQGGYGKYQGTWINYRRGREFCRQYGVEDLLRPLLDYDISAEGTQGHGLDTPTKEQAMAANRKRFYTQTIDARQPSQSLGGTFFSNISSTATSALAAMNKVARLHSPAPPRPASASQPRRSTTRPSQPPPLPSQDSFRTSSQHSIHSLASDRSFSAHNTHPHHSNNTHNTHNTHTDSAYATGADDTQEPPSKRLRDDSFSQHRPNAADDLLHDHGSPTEPSDSFYQHQTGHHISLPDGQVPSALPPLPFPDTKLNEEKQAMLTDLFADQTRTDFTNHPAILHLSGADLDMPIDNSSNTALHWAATLARVSLMRLLVSKGANMFRGSASGQTPLMSAVSVNNSLDHSCFPETLEILAPLIELRDTQGRTILHHIAVTCAIKGRAASSKYYLEALLEYLVRSNIGAHQIPSFLENSNYPKPIGLMRFMQEMVNARDKAGNTALNLAARIGNRNIISQLLEVQADPTIPNHKGTRPVDFGVGSDLHGDAADTALSAASPSKGKVPLSKVEETSREIQPLMNGILQSASMQFTQEARLKQDLIDQTNSTISTLSSLQKSEQSRLETLRSRLRQRQDRAKRIANLKRWLEPQRHMLAATNAATDLTQRRDVGYADAEGAGVLVQESDLPEEVRREGEHLIRQASGGPSYLSTPLSLPPAATLSPSLTSIPTVALRQRVEVYTQANASLLQRSRQLKDKDGQLEAMFRQVVCLCTNVQEDRIDEVLPSLVAALDSDPLDGVEVGRVREFLRKVEGVEA
>Arab_Me14_ctg01_-_Arab_Me14_ctg01g689t1
MLENPLVEPARILRHAGRVILGSNASSFTLENQGDISTRAEVVLDYQRCEGGIPVFEIACASGATSIGVNIIYSEGIEGIDHDTGDGPFFLFSNAMDTYRNTFMTVPAETNPQTTRAVYAQRSQRYQKVILTTANASITFTKIAFERIRPSAPPRSTFTCSSELLNRIWQDGVRTVDRCTVAKGETSSAWEVTDEGTRVRGQHWAPCRFGTRWADKTVRFQVQIESGGASWAVHMVANGLIFCLDVVERVLYACEGLSTEATIFPVAEKGRWALGDLDMDAWLEVETATRGSTVIISVQGRQLAFIENLDIRPILGGSPNNTGSVAFGGPCQWVSRYRKLSVHDSQGNALYENDFLRKDEQRTLVDFQVGTNALACTIDGAKRDRACFGGDLYVMGRSIAHSTMSFKAIAGSIELLTSHQTADGYLGNLCPIQAPVHDTKEEPPTYAFYSLSYALLLIVAIKDYWLHTGDEKIRSRCLKPLENLMSYAEQFVSQGVVIAPPPLSMHWFPLGGPVFGASSALNNAYYEALRAMTTLSTDAAIKGKYSVQAQSLKVNMLRNFYDPFTGVYHLDKSLPASGICQDIKAHAITLDLLPYHSDDLDHLIDPDSGLPRAFRGLGHWDVANVASPYATGFAVEALLSRDRGAEAVKLLERVWGPMADTASPNYSGGHWEAMKPDGTPHGHDTSLMHGWSTWPVSLMPRYLAGLQPTSPGWKSFSVAPVLAGLTNIKCVLETVTGRIGVELDIDEANSHGALKILAPYGVRARLHSPQGWVIQGPELIEGIGEWQKFFLSAAGDASVLETKSAALQIEAIPTPLL
>Arab_Me14_ctg01_-_Arab_Me14_ctg01g690t1
MIEENLPDARQPTNIGLHTELDEMLVHSPWPKPVSHYEPYFDYATFARPWNYHLDHTADTSDWFSSQFFAALRETDLACSPLFQTWNNTGYEPTTLDIMGALDRGHDMLPPSVTVDEGAISLQTGDDLLQSSQVRPRPNERPESLPGRASRVASPPNESSHEDRLPFAWDPRSKPIARANPIVLPMNDPIFASINRAVEISQTTLSRVSAFLRPANPVNGEDIFTMPELPLVNVFISLFFGKFLPQVPVLHKPTMKIEAFPPALLSIIIVIGSCYSRLRHTRRFGIIVFDRTRQNLLALIEEDNSLMRDPLSIYAAALVCYMGLWCGNKRAFELSEALRAVVVTYIRRLPNDHNQQVQPFHEMRHTTTRGHTNSVPHLARSNPLQSQWSGWATQESHKRLRWFIYMIDSQFPAILGMNGMMTTADIRKWECPCDEEFWTVATARSWKNKLGSASEPSCPIFGSLTALLLLAPEQPVGNESVALLPSVNTWSANLLMTVAMSEVFHFQETLVVIRTYEEPECSQSTISSSSSHMSCHVAHLLGMLELWKHSYVLPHQTRRPDTTSSHLKHCSMIMYHLARLYLVFPISDIQDSLGRSGPADAEAARTKLSAWIHQCPEQAARAVEDAATCISLIMCNEGESDPYDVIGLFLCHVVVWSFAHAASAHQKGFILRQLQDKPGVSPAVLEVIQAGFAHDDSTDDSEVDAPQLVFRHAIQSLVQLGTWGASSNLALLLHLHPGAAR
>Arab_Me14_ctg01_-_Arab_Me14_ctg01g691t1
MKDELEKQEASSATMIENVANDSDLQFGEGLVENDRDSSLWASAMSHKLILAHSIAAFLAGGVFGYDSVINGASISMPAFLLYFGEHTATGSLFVPSIWASMWTAMSYLLQAIGGFGIGFVSDRIGRKWACVGAACISVVGVGVQFAATSRGMLLGGKMINGLAIGCIFASATSWASEISPLRLRGPIQSGIVLFMVLMQALGLVTIRLYIENISPSAFRSVFALQWIWPVAAGLAFTVMPESPIFLVQKGKITAAKKALTRLYGSNNHIDARLAVLCKQVEQERSQAEGHGNAGYLELFQGTNFKRTFTVLWLFLAAGLNGASLLSQNTYFLIIAGLPAVHAFDVGIGGFGLAIIAIVFSWFYMEKFGRRSIWLAGVAINILVLAIIGSLYYLKSNGSLWAVAILMNALIAWQLLTITSIGWVITAEVSSYRLRAKTQSIGVISNATVTWLFTFTVPYMYNTDAGNLGSRAGFVFMGSSVLLLIGSWFLVPDLHGFTTDEVDWLYSQNIPVRNFQQYADGRAKQGATMRTVATGKC
>Arab_Me14_ctg01_-_Arab_Me14_ctg01g692t1
MKTSILLTAAALVSGIHGCFLTAHSSTVGDCHGRKSEPKNHGGARQFVNWSKDACNIKGELLNGCTVNVSSTKGCGSVSFSIWKPGRFARGFQATEAEM
>Arab_Me14_ctg01_-_Arab_Me14_ctg01g693t1
MFYFLASLLLSHSLGVNARSQPIPIRSTGNPILADGSYFSADPAPLVVNNTLYILAGHDAAPENENSFIINEWEMFVSTSTPDPAGSEWDFYPGIIQPEDVFAWASPGTAYAAQIVEGPDGRFYLYAPVTEAQSNNADKFAIGVAVADSPLGPFKDAHASGPVLSQSKPAPGNDIQNIDPTILVDDDGKIYVYYGTFGDLRGYQFESDMVTPIGEVTTVSTLTGFFEAPWLMKRNGTYYMLYAANNAGPDSPCTPTSYHACIAYGTASSPLGPWTFRGVLLDIVSSTTSHPGAVEFNGSWFLVYHTADADTGGNFRRSVAFDEMTFDDAQTPPGINKVVQTRRPPRPSRPTRNVAPLAKASSANTTPIQYWIAAVNDEKIPSNPLPPEYWSSYADEQSPQNSTLTLTWNTTLALNGTRMVFFADQPDGSDIGVPPPASWRMEYLSDSGSWVAIESTYPTTVTDGPDELGFAQINTKSVRALIVASGSNGQFGGVAVKEWEVFSTTAR
>Arab_Me14_ctg01_-_Arab_Me14_ctg01g694t1
MIPGLSESDKESKNYTPFQADLSSPDIVKHAVQQSGATSAFAYTIFDSADNMRSIVDALRKAEVEHMIILPSGSVKGPAEDGGNMRNLRPKSH
>Arab_Me14_ctg01_-_Arab_Me14_ctg01g695t1
MQLSILVLSAVGGIVNALPTTLSPIELRSDGRAATLFKHPDLATINADSTFVPANAYCTDISNIFGGFDGNIRSLSVEEGFKCDFYKEAGCGVNDFTSGGAVLEVGFKNKKDERKQLGSWETKIASVICQRL
>Arab_Me14_ctg01_-_Arab_Me14_ctg01g696t1
MSPTERTPLLGGNPLPFLSSDFIGNGSNSKKDIHQQFCLLVGVPPSNGPKDIPRRSDFKRTLYGRAVHKRNTQNATYLFTAALSNTLLLTQVVLGAALTALGASESSHILITVFGALNTIIAGLVAYLKSRGQPMRARMFRDDLDRVVDEMENSEVMWLGIQQGVHGYDEIAIEDTVSVRSEVARLTRLLDKAVRSNTMNDPDMYMNAVGEGANAALRARPIQPEVISAPESSPSATGNASGPANAAAPAPTADPDASPASAPPKQKSQPSSPPPELADEQAEPVKPVKEATTPIPAPSFSSIVAVDAPPKIDAVKLADKSVNGEPVNNENDVEGTQAGEGGETNGEGSQSASTEEGDDRLVKKGEQNLDGV
>Arab_Me14_ctg01_-_Arab_Me14_ctg01g697t1
MRTHRQAAELLFVEHHSASSSKTLAAITSAPRTLHLAPEPPQPLVSTLERRAHGEAATGTGASAAPPLTLNWVFVSCVIQRASRCSNHLLLPAISVLHAPRHACHTLVTSPPLLKSRRLLYLCCPHRYLVSNMPIFHDPHESPPQQSASRQMSSDKAQRGGESTPTHHVAPLDSLRAHGATGSGMICESASHETRPRSRDRNELMERIKRVKSPLWQLGQDQTSSHNHCRYSSRPSSQDRPKTPATPSADRQAPRETTPEHPVDHVSAGLEIARPRSALHAGDFRERSACVGTGQAPPAFLATSPVVPWDRSFPVAAVPPPRNTAHHPFHNALSYDPPPVSRARAISQSPSTSFTLMPPTSPLVQQVNNTDLDSSSRPSSRRGSRSPDRSNRRHTFSPDSFQPYQTTQQARSTTGTPAARHLRHGGTTPYQAHQPRRSVTSLTHIEPHSSPQTPFAARRPSITSDASPLHHAPMVGSYEESILRGRMSTTPSRPLDFVAKIGVLGRGQCKPSLKCPPHVTVPFPAVFYSYNTGNGRISDNEPSPYVGLIDLEHSLPPPSESQESSKRRRHHTPSAPDHNSFDLRLQLDEEHADDIGRAGLRRKEKKKRRSTSPKAPPGGCYRIPAEGQLQIVLKNPNRTAVKLFLVPYDVSDMEPGQKTFIRQRSYSAGPIIDMPLSFRKNFGTDRPEAALSNSDDPRDRPILRYLVHLHICCTGKGRYYLYKSIRVVFANRVPDGKEKLRNEIQQPEPKYSTYRPAREPTTVQHTPSHEVSLVTETAYRRRSPAWPLSRSQQMYDQMDGLPQNPQLPPPAVRFTGGSLSSPSSGDYGAGIPLMQPIPFNFTRLAAIESRPVSRERMDIDPKSPFRSPLASPPPGVGNSIVHQEATFEKLNKGDIGYGGNAFSPMGSPASPPAAGLLAQRLRGLEVQPEADLS
>Arab_Me14_ctg01_-_Arab_Me14_ctg01g698t1
MAEKRARDGDAARAVKKQKKGFQIGPANLPDSTHRRKVKKIKEDIIYKAKLKKQYAKIKSREAQAEDAPRKSVYEREAEVAADTDEPTAPVPEPTLEPHPDRVKMLEEPEKEPVVSSFDRRQRRPRSQPFQKEAEVARKKKDEAEARQKAREDADRERTKKIAERERFRKAMAKARGGPNGQRKLGRESQVLLEKAQRLMGKS
>Arab_Me14_ctg01_-_Arab_Me14_ctg01g699t1
MTNSERQPRRWSLAEDQILREQVEVQQTEGGGKDWCRVASALPGRTNKDCRKRWHNSVAEGLNKGQWSRPEDQLLLNGVHQYGSQWTKVATCVSSRSADQCAKRWQQSLDPRLDRSEWREDEDLVLITAVNRLGRHWKDIQQQHLPYRSKNCVKNRYSVLSRRMATKLVLYDDGLESSSSDPGTPPQTEAEMPLGHTPMILIHQNQQAPYMQGSVLDTSGDELSWTWSGLSNPNVLMTPRHHESLNMHTWPTQYSGGDNSLHPTNHSGWYDAQTNTASQYPAQYSSTSYPSTQGHMTSPRQTHVPPSHFYASTFPPNTPSTRQPTSTANIPWSGYRYRDTAPFG
>Arab_Me14_ctg01_-_Arab_Me14_ctg01g700t1
MESPSFDHLHVDVNDEQDPLPKRYRSRSSGYIDHLEEQARWDRRDREHQLKRYRESKKSPWTNHGSTSQRLVVPVFETARGRGPGRRGSNGTQRNESPRAFHEEEVRPGTRQMRNSDLNQGGSAPPPPPPPPQMSSRPMSQIYGGIGYVPIYIPPAAPVQPSDLVSKAEKSRIKVAILDTGLENTTSDQNDDKDDHGTMLRHLETGNKYGPNLGYDDILEPALNSDLLLLSPRSARSSLTGPSLSTPATLRCPVESCDSEFHGTYRKGNLTEHVRRAHTEFAFKYQCKSPGCEKLYKRQDGLLRHHMRKHPELAVAPVPTRWQFELSPKKDQELDPIPQNDVLDRDMPLEMSKVVEVIEKLTAIGVPDSLFAPSGGKQNSGNVITTEEQDLQGYRDEHDPQSIVQAAAPSDLEAWLSWSEDTREISSSPSNLDSNSQGFPWHEKDFDSHADEIASVDNSVQPFKGKSSIWDSSIWGSSKKNKTAREDKAREKKEEKYHLEQEVKEAEEVAELSQDQLPSAYEKEDDSVSVDSSYAASVFSIASLASAATDLSQASGYSAVQIATATRELINIFQEDKFLVPLYQSAMLSTSIGPDRLLRNLRRLFKSYAKDLGEEAEERLDFLASRLVALRARDLAQSIVRKFQPEQSMSQNNTAHHEKSDDESSDEELGSSSVNDSHFDDTRIFREFLVRSTAFATLCTQIQSFVLSRSYEPATAEPRDSAQGPKVATCAPSTKGLEEVDSKTWRRWSSDVAQTVDAIFIHDTQLVCSLLTQLAFDAFSLVTDRAFIATGLLEPPLSPGFIRLRWDCGCGENIFSDIKELQKGGIRELAARMQDSTGVKVVPSSYNQRSGNQQYSIPVHLKWFRSTPTSSQTGRRKTTRLSSDQSSTTASTTTCAANQGSKPHKPMLHLMACVHDGRSGMILQQDRIEELFTDCALIQFLRTQYRKRRSRLRTILSLKRVQGIFFVKFHLPMGSSVIIRPHGVSCIPLDSISSSSATTMCECLPPKARVEPINTAEYQCYPVPPKTFPPVPPEYLRSLFTCHKEPHPMSTWIIQQLPKRKWGELFGQPDQPAEGWGIYYKEGWDPGMIAIFVFLLLLASLLFGILWTALRSDIQGAFGVASWIVAIGGALLAVIVTQVDNM
>Arab_Me14_ctg01_-_Arab_Me14_ctg01g701t1
MIMRTSQVLLWFGLAELHQSVDGLPATFCIEASRDIYNPGSEAAGYHQHPRAEVKLGRGLGRRAPPKKGGVTPPKAPVVVPVPQTPVGKGNAKSNTPGAPDKDKDGKGKAPSKKGKFRVYKLGKCGSEDARDEIKNIDSEGNSPPKKRKTSKPPKTPKAPKLKNRPDNDGDDDYVKPHVSVTNLLSVFPGGEFHKGEMLLLPGRLNNKKAPLFSVREHNVMSPVDFPNYSLHRKIHELREIVLLIEYLNSSDVAKYFKTLSLRIQDRLAKIDADGNDAFVRDIDDWWFKQKNNRALKDAPGEQYKSLKLGGRKDVCGAAERNREDLQGQLRDSNEGAEKKNIKKAVKVQAYVIGSVSSPNTSNVSDSEPFPEDDGNSDSDALPESPTRPRPAPGQGQPMNLPRRPAPPSVARPSTPLRKSRRL
>Arab_Me14_ctg01_-_Arab_Me14_ctg01g702t1
MRLTAAQNEHARFFREVKAIWEELASWGDDLRVEVVFFNVAGFSVYKFVGPDVCSEDFSTLLDFSSLPKSPLLPSVKSLWVREETNEEIDLWPTKVTCSVASSLPTLECLKTVGVDYEVQWPMARRSLRRTLAEQISRLPASLKTLYICLRYGGIENHEVQPPNLLGGNLDSLTMMRLPLLVSQAGPTFESLTLAPALKDHPGIIGSVPPQVILSTSLGAWPVRRFLTRPEPAFFDELAVSMARAVSSMPKLEYLDLEFNASHQGALKPDVTNYNQAPTRYGGFRPHLHQYEGWTFYFCASNEAKFASKYSRPYWFEHKPGLDRTDIERPRTEWVFQCPHGHLEWEEPEVAKVLWREKCPHIDFDVVALDGVGTSWERRRNGNLVPLLGKGFATKFPEMQDLDEIPEGLE
>Arab_Me14_ctg01_-_Arab_Me14_ctg01g703t1
MAPLLKVKYIWIDSLCIKQDDLEDWNTKSAKMADIYQGAYITLSATASSGDAYGCFAFTPQSLNDVEIQLPDGLRPIKIAVYKAVIHWDEDTPRAMRDRFLLMTRGWAYQERLLSRRVLHLIKTELVWECRSLVTCECKWLSQRSSPGGNFEQSLEARKGEQRANTGHQLQLNQTSEDWLIIEWIQNATNEKEQERMRRSKKLSQKDKPPKERRRRRKRPFAPQTERSEALSWFDFFTITVEEWGNPKADKLANKLATYLADVRECADYGLHFHRVIETYSGLRLTKRSDRLIALSGVCNFVQGIRGKYAAGLWKHSLCFDLLWRVERLDVDVVENDDSASYHGQSWSWVSVNCTVVYWTVIIDSSMPHDCFDLPVKKKTDDSMHSSRRQLALHGVSQMIPCTSS
>Arab_Me14_ctg01_-_Arab_Me14_ctg01g704t1
MILAPRFHRIAGSAASRFSKDFISTSSKHICCPSVSRGLTTSSVAFSGLLPSPQPYTFPASSSSRPSIQRQKGGQRLLDSNARCISVEAPHEPKVGSEPGININDKDAWPQWREKVQSQITAVDFSIDRIEKYELDNSTLEDFLAKPREDWVTCRWINVNGLSWDVVRLLGEKQKLHGLAIEDLLHTRNRTKADWYPEHVFGAYIMLDFPTNTCPDEQAVLLTLQRLISKSENSADGKTPRTPQPRYISTSSPAYREKHVPDQYRQAVKTLQAYRTNVDPERTRYMEEHSTLNPKGLMVSVEQVSMFLQSNNTLVSFFEHSADVIEEPILKRLQSSETVLRQSGDASMVMHAIIDGIVDLAIPIATAYEDSIAELELDVLTDPSIAHSKALYILTSELSLLRSQIAPITSLVNALRQHNSNALLQTTGASQNPSSSHIANSPPPYAPKDHSTASITITTLAHTYFSDVEDHCITVTESLERMRRSADRMISLIFNTMGAYQNESMKQLTFVTILFLPMTFLVGYFGMNFEQFPALKNSEAYFWWLCIPVTGTMILILMRQRVWRGLTRFWRRRDVAKSRRARLLKEQRW
>Arab_Me14_ctg01_-_Arab_Me14_ctg01g705t1
MSSNDYYGGQGHGYDGAHQQQQQGYGGYSQQQQHPPAPAYGQPQHEQYGQSHSPYPQQQGHYPPPAQDQYGQAPQQHGYGAPQGQHDQGHDASRGHSPYPPPAQHQQYHDPNQHYGQQQYGQQQHGYGDQPHQPQGYNQQHGQYAQPGAPGAPGGPADGERGLGSTLMGGAGGAFLGNKMGGGALGTIGGLIAGAVGANVLSDKVEDKKKHKKHKKHSSHGSHHSSSHGGSSAGIGGLYAGSAHGHGHKKHKHRSHSRGGSSSSSSDSD
>Arab_Me14_ctg01_-_Arab_Me14_ctg01g706t1
MGDVLLQFFRKTLPDELAAVLEDVLKATETADLLTLSQLPEVQILLGHKDNDATKDVKREDFTLWSDYIFHRLGLLFPFRTEEEGTPVKETLAYRVHLLWAVAVASLYAFVQSTVTGPPLSYKPAEILFSKGVSGDATAVRKIQQDLIASMTLDGVAAYKLTPNIELLCLADTILINPVFQKFIELSAWARLRVAFTYQRLLSEPAPSLQTIIYEDLKTVEKLVKESANAQGVQDLHPSFLLERAAVHTHHGLDKQARADLDEATAERKFEFALTGLMGKRTKFQQKDTSQLLVLARSAGTKSKAAATEASGPMALDLNDDTLHETIQFTEKVASMDIKDETKLPPSLAELEPANQPLLQPLDSVILLSLAESIKNTNPADGITREQTVPYAERVLEGGSSNWQVYTHALLVRSRIEGYKTRTMERGLLQLQALVDQVIAETSGESTSDAETGEKVTAFLPGAKEGESAPVEDRLRYFFALCSPSRWELEAELAARWVHIGGLRSALDIYERLEMWAEAALCYAATDKEDKARRMIRRQLFHATNGDDLTADPDSEAWEGAPRDPPPAEAPRFYCILGDLDSDLAMYEKAWEVSGKRYARAQRSLGQRYITQRNYEKAAEAYQLAIKCNALNHPAWFALGCAYLELQQFKNAIEAFSRCVQLDEQDAEAWSNLAASLLHLRPKAKTAEEEAVEGKVTSHPRTDALKAFKRAATIKHDNYRIWSNVLAVAASTSPPSYPDIVTAQRRICELRGETDGEKCVDPEILDVLIKHLVQTKSDAVLDLSAPGLPRLVNELVEKQIKPLITFSPKLWAVLATLYMHSGRPTSALECHEKAWRAVTSQPKWEDQDEKVWDAVAQQTVDLVDAYETLGPRERTEGLAAGSGELVAKDWKFKARSAIRSVMGKGKEMWEDSKGWEKLVERMEELKASA
>Arab_Me14_ctg01_-_Arab_Me14_ctg01g707t1
MSSDSAPRMVRVLAPRMSPIVTDGTVSIVLTDDYRLSPYMRDGDPDTNMPRTIIPEKLTTRSASVPLQYALGINLDAAKIWLEESLPDGFRAMDPNWVLFFDCNPDLMLARSFFPLHHTWHGFMERLLGANYDSALIARLIKNHTNKGRDYKPSSSFGTDSWEVKIGNRKTDDCAHHDWNLVSLAKGVVQLPTGTDRRHRRMAVEHAKAEGNTELMLSKLPAYSISVTQMAKNPPNKFPAAIIALKRVVLKDTNSNVSCAAMESTPTATEGEIVDRGYLYGIARIIRVEKQCQYSNDKIN
>Arab_Me14_ctg01_-_Arab_Me14_ctg01g708t1
MTTKTVPTLTLEGARIALAAAEQRAKEINVPMNIAIVDHATHLLNFARMEGAKFTSINIAIDKAFTAAGHKAPTSVYKENVWPGGPAYGINHTNGGRFNTIGGGLPIVLDGVVVGAIGCSTGTPAQDEDVSTAGKKAVEKSFGLKAKL
>Arab_Me14_ctg01_-_Arab_Me14_ctg01g709t1
MSGIICAWAANMSQSSTQWYEDEYIPSTTSKLAQHALHCELVGTGLGAEVDGIGTQEAPWKWLTLYEVDDANKATAATYDESNRPAMAGGLEHARLDVRTYEELKRWQADDWEGEYADIASVAVMEWQVEEGREKEVLDFYKAEAAPTIASSPEVLRFRMFKIQNATVFKAGLYETLGKETTHTYLTVAELEREEWPWDVVVVLGENPKWREYFDSQKAVKWQSSHYLVKRSYPDPDEDGKDI
>Arab_Me14_ctg01_-_Arab_Me14_ctg01g710t1
MVCRNEHPTDTNSVGLTAMLCELRLERIAQTWRDRCTVKHNIWANEYNRRIEEKKAQEEDDKMFIEKCTVWWKECRELANQLRALFHKFRTNHPVTPADWEALTAGKERKVFAVLSTCYPKETWPRSVPYLNLIAHALYEEEEDDRRLWYMEQYLVAMEDIRRRGEEVLGTKRIMGNSSARISFQAPLTEAQVLENRETLRVKKQQLQADKAQFFAELYDFILARLHGHVVLDGGWDVDVWAESVLEEIGIIATDEVKEHVVHFVHQMSDEPIDESEDMANVAFEQDINCEGEFFLPYDV
>Arab_Me14_ctg01_-_Arab_Me14_ctg01g711t1
MSSNNNLYDPDQDAVNTRWIQPWSEAFRAQRDVGLRIPIDFHTLAAVSLTQACFVDNQFEHNAFQKCFSNLLGVGFPRFEVDVYWDALRSVWSLCPVELPLNDTEVQSDAPVISGPTISVSTGTANARVPETTATMPAPLKVRQGGSASSQSELSSVTVENPLPSSSPGPTSPSAQPTIISFPTVKGPPILQIGRYNCTSQMTLGLLTGLLEDFLDKTSTTTGAFVTFLNLNIHAAATLSNPNGPAPQLTEDQVPKSGDLLSDIVNGNLSSVLYSPKTLAEQRANLNSSWYDVEWENLPAQGYYESSQNSAGNIFTQSGWPTEVLMEFQDLKRLITSYGTVDDQMTAYDISGDLEDIFPPGTITNQRPVLFDTTGQISSGCYFPSVENTITLQTNSSFARALPPTVNIDTNPDLMSPISSVSNLTRCGIIPFLNQSLASTTADKNPLPYAAYVHSTLWSWAPGQPLNVTRSSSTANRCAVMSTSSYPGRWEVTDCRSRYRGACQNPQQPYYWEISSDNSDFNSATALCRSPLQFAVPHTALENAHLFAALQNSSKPNEPIYINLNQLNTPDCWVIGINGTCPYLQSTDTNRTRIVVIPTVAAVIIFVLAVFTFFVKCASNRREDRRGRSRKMVGGWDYEGVPS
>Arab_Me14_ctg01_-_Arab_Me14_ctg01g712t1
MKEEAVYPSTSPEASSSSLTPGGGPPKKKQKRNKPTLSCEECVERKTKCDRSRPHCLACIKRQSVCKYSVIANLIATSQDGDGAARNSGRPRKQQQKPAQLQLGSDTQSHPLPLQAHAQVPTPVRAQYRSVSLSSSGSSPFLLSNVPFSSRAPQPFFGLGSEHPFANYWTSRGGIAEVVGVLPAKEQADILVDKYFDAVDPVYPMIHRRNFYADYERFWAMSPEERQVADPVVVALHFVVYAMGTQFIHTPSNHERAQIAEFYVSAAQQALRLSSYLSRASVRTLQAMVLIGYFLMNDNHASDAWAFGGVLVRQAYAMGLHRDPDVIASRCSRSDKQQRRKLWQAIFFQDTFLTVLLKLPPTTTFSDVRPESLGDELDDYAMPNGSSNGSTDTAINPMSITHIASIKDVYPTYELADRRYIRSMWHMANLVSRTVCMPRSLSTPLTTSLAQKMALVQEYFDLHRSFPPELTASDDATIQKMALSSPRSLRQNLFFRSNFWHCVMVIQSDENPTKGYTCEVKGCLEAARMAVRSFFHFWEYLRIDASVWWVFQHRAFEEALLIARILGQQEQPLSPGHNGPPSTDPLLRLAKEDARKCLEILDLVGIAPEMQKTRTEVLRTAFADILW
>Arab_Me14_ctg01_-_Arab_Me14_ctg01g713t1
MNHSESTDSTPKTSSLPRPVEVKLSESLNSSPIVLPTPSVTSEMDHIFLEGSNMETNQDQTEIQVAETTPNSEPESMIAPPPSPPTVNEESKVTIAATGAKKVRTEKNKPAKKSSKTSKPKNTESSDSDTRDAESESENSVDHEKGKRKKKRKAAVKTQETRRSKIKAKLKKRKSKRRIKKADLSDDSSDDTCGTSIESGLDTTSDSETDGNRTRRSSHKTHKAKSKSKRKSKRNETSSDDDESELSSNTSSSSDSDSTSDDVKAERKRAKTKRRVKKLVEFVASASESEDAPLSPGVILEFPVPGDDINTQVAKMDAILRSLKTEQLAATNAATVGITPRLPKSLAKKNAHEFKRIDQVWDTKLRDYKLIESTADQKDEFECVFTVRRRFNWEGKHHETLVDIKSKALRSALQVILKECKNVSLVEDTPEVDPHTLFHHYNEIKQYVKHTMKPKLKRTRKSKDRKKLTQEIAQCKLLLGYIDEDFAATRKALKPLLKAGTITYDLCWALFKPDTIVYTPTYGNKDDPRCFKVDQCFEYESWLSGAKSWMINGRYLEYDGKVFGFGDHQTEIKAFKGHKKITSLVAYPLEYHKDLKNIQKQLIERGKKFVALQGMSYRLQKGIAYMKVKNTIAKFNINGRVMIDPAIFRRIQPNYPLSYIKQDELDREDEEQEVSDDCCYSNEEDDGDLSGSERPEKDPLRVVLWKDSKGKKHPITVFQSQVDAENGVGENATSKLEMDEDGHMARHIFTEEELLIASPVVLGFAFSEKLWLEFSLSGIEEIQWNAEAFESLVLPDRVKSNLKGLVSSHRFNAARTIDDVIQGKGKGLNVVLHGPPGVGKTLTGESIAEYLKCPLYAVSAGELGTNSGSLERDLNRIMDITHSWGAILLLDEADVFLEARQPHDIHRNSLVSVFLRLTEYYQGILFLTTNRVETFDEAFQSRIHMGIRYENLKPPARKKIWQHHVGKVEKMAMEELQEGKGKDRSEKKPFKELDFDELSKKNMNGRQIKNTVKTGQSIALSEGAAFGMEHIKRVLEVAEAFEDDMRGGKGYRDAMLHYT
>Arab_Me14_ctg01_-_Arab_Me14_ctg01g714t1
MASILRQIVAGPRARHAEAGLDLCYVTDNIIATSGPSGTYPQRAYRNPLDSLVKFLDSKHGDNWAIWEFRAEGTGYPDSEVYNRVYHYPFPDHHPPPFALIPNIMASMRNWLKEKEGRVVVVHCKAGKGRSGTASCSYLMSEEGWPMEKALQRFTERRMRPGMGYKGVSIPSQLRWLTYVDRWAKHGKMYVERQVEVLEVHCWGLRDGVKIQIEGFVEDGKLIKNFHTFTTEEREVVRGEVKTTGMAQAVHEVMYKNGLSGSSGKANAQQDGNKDTSQNASSSSLEVTRDADGTATPQVSSKESLLPGTGDVVFRPSKRVVLPTNDMNIDVERRSKAAFDLTMVTAVAHVWFNTFFEGNGAEKNGMADDSGVFEINWDAMDGIKGSSRKGTQAFEHIAVVWRALNAEDGRPGVVITEPKEGEEVRQTGPTDWKGTKGVEPSEGKDLGLRISSPDDSEVDLTHTDAIKSANEQNKTAIRMPGRRNSGESDDSDTRDVRSHGPNGEEVLQYSTSARTSLETSGNSKGPQATASQPILTSQPEGSAAHSRPPSVGSHKGTRHVEKIIDNVKYHVSGAASTGDLPDGKPEGEMKDAKEHGLGHVGRSKLSN
>Arab_Me14_ctg01_-_Arab_Me14_ctg01g715t1
MSSSTKYLVHADASLFQPQHTCMFRYLTKRAMTSAYYLAKPPSSPFSGQSQMASSVPLDEIPTLTLLYKLKKIEPAADSASTYKPNATYNDRISIIRQDITTLAVDSIVNAANTSLLGGGGVDGAIHRAAGPELLDECGTLGGCETGSAKITDGYELPADKIIHAVGPIYWNKSKDEAARLLAKCYTTSLQLAVNNECKSIAFSALSTGVYGYPSGEASLVALETVRKFLEEGEKADKLDRVVFCNFLQKDEDAYFKNIPTFFPPITEVHANADNGCTEDEEEHTTEAITEILSQLPDAPTDEPVDIDDAKLPSQKKQKTEEVLDDDFVVVNKETTDGAKPKAEL
>Arab_Me14_ctg01_-_Arab_Me14_ctg01g716t1
[truncated: 5,667,955 more chars]
